# Supplementary material
Source: publisher figshare collection journal article supplement (https://gsapubs.figshare.com/ndownloader/files/22398732)
Supplement: Supplementary file 1 [file 22398732]

Archive with 21 entries (21 files):
- Table1.pdf
- T2.pdf
- T3.pdf
- Table4.pdf
- T5.pdf
- Table_A1.pdf
- DR.doc
- SD1_CL.pdf
- DR2.pdf
- MovieDR1.pdf
- SD_T1.pdf
- SD_T2.pdf
- SD_T3.pdf
- SD_T4.pdf
- SD_T5.pdf
- SD_T6.pdf
- SD_T7.pdf
- SD_T8.pdf
- SD_T9.pdf
- SD_T10.pdf
- SD_T11.pdf
