# Supplementary material
Source: publisher figshare collection journal article supplement (https://gsapubs.figshare.com/ndownloader/files/22398732)
Supplement: Supplementary file 1 [file 22398732 › DR.doc]

Supporting information and data repository for:

*Late Cretaceous gravitational collapse of the southern Sierra Nevada batholith, California*

Alan D. Chapman1,3, Jason B. Saleeby1, David J. Wood1,2, Alison Piasecki1, Steven Kidder1, Mihai N. Ducea3, and Kenneth A. Farley1

1*Division of Geological and Planetary Sciences, California Institute of Technology, Pasadena, California, USA*

2*Now at 3423 Broadmead Dr. Houston, Texas, USA*

3*Department of Geosciences, University of Arizona, Tucson, Arizona, USA.*

*adchapman@email.arizona.edu*

**1. ANALYTICAL METHODS**

**1.1. LA-MC-ICPMS**

With the exception of samples 91TH181, 93TH417, and 91TH140, U-Pb geochronology of igneous and detrital zircons was conducted by laser ablation multicollector inductively coupled mass spectrometry (LA-MC-ICPMS) at the Arizona LaserChron Center (ALC) following the methods outlined in Gehrels *et al*. (2006). Zircon grains were extracted from plutonic and metamorphic samples using standard mineral separation techniques of crushing, sieveing, magnetic separation, processing through heavy liquids, and hand picking. Separates were then mounted in epoxy, polished, and imaged on the Caltech Zeiss 1550 VP field emission scanning electron microscope before analysis. Representative cathodoluminescence images are shown in Figure SD1. Zircons were ablated using a 193 nm ArF laser with a pit depth of ~12 µm and spot diameters of 25-30 µm depending on grain size. Data reduction was done using in-house ALC Microsoft Excel programs and ISOPLOT/Ex Version 3 (Ludwig, 2003).

The normalized probability plot in Figure 6 was constructed with isoplot using 206Pb/238U ages for grains younger than 800 Ma and 207Pb/206Pb ages for grains older than 800 Ma. Analyses with greater than 10% uncertainty, 30% discordance, and/or 5% reverse discordance were excluded.

**1.2. Isotope dilution analyses**

Zircon grains from samples 91TH181, 93TH417, and 91TH140 were separated from 2-10 kg rock samples for TIMS-isotopic dilution analysis. Magnetic separation procedures were aimed towards maximum sample purity and selection of highest integrity grains. Non- or paramagnetic zircon was taken from Franz Isodynamic Separator runs with a front slope of 20° and a side slope of either 0° or -1°. After initial washing in 8N, and sieving in expendable nylon sieves, the fractions to be analyzed were picked to 100 percent purity by inspection of each grain. Only well-faceted clear euhedral grains lacking visible inclusions or cores were accepted.

Zircon separates were weighed into a TFE bomb capsule and then given an additional 15-minute warm wash with ultrapure concentrated HNO3. Dissolution was performed in concentrated ultrapure HF with a drop of ultrapure concentrated HNO3 at 235°C for 3 days. Following dissolution, the samples were evaporated and re-bombed overnight in ultrapure 6N HC1 prior to spiking. Samples were then spiked with a mixed 205Pb/235U tracer, and equilibration was obtained in hot 6N HCL within a sealed PFA container overnight on a hotplate.

Dissolution and chemical extraction techniques for zircon entailed cycles of 2N, 3N and 6N HCl, similar to those described in Krogh (1973). Mass spectrometry was performed on a VG Sector multicollector instrument. Pb and U were run on outgassed Re single filaments with silica gel and graphite loads, respectively. Pb was ionized at ~1400°C and U at ~2000°C, yielding typical ion beam currents of 1 to 5 x 10-11 A. Regular inter-calibrations of the multiple detector system yielded stabilities at the 10-ppm level for time periods typically in excess of several hours, and thus Pb and U were run in a static multi­collector mode. 206Pb/204Pb ratios were measured with the 204Pb beam directed into a Daly deflection knob-photomultiplier system. The gain factor was stable within 5 per mil over the course of the Pb runs. A 0.13±0.05/amu mass fractionation correction was applied to both U and Pb runs based on replicate analyses of NBS 982, 983 and U500 standards. Uncertainties in radiogenic 206Pb/238U and radiogenic 207Pb/206Pb were calculated as in technique described in Saleeby *et al*. (2008).

**1.3. (U-Th)/He zircon analyses**

(U-Th)/He zircon ages were determined for a subset of samples studied by apatite He (Mahéo *et al*., 2009) collected from a traverse of the footwall of the southern Sierra detachment. This subset was chosen because it lacks the potential complications of Neogene-Quaternary faulting and burial by Miocene volcanogenic strata (Maheo et al., 2009). Plutonic rocks in the footwall of the SSD were tectonically denuded along the traverse to ~6 kb levels (Nadin and Saleeby, 2008) shortly after igneous construction (93-85 Ma, Saleeby *et al*., 1987, 2008), making the ~180°C closure temperature for the zircon He system (Reiners, 2005) ideal for resolving the timing of the rapid removal of upper crustal plates.

Three to seven grains were analyzed per sample and the results were averaged. Following the methods outlined in Farley (2002), molybdenum crucibles with two depressions were used to hold the sample while heated. Individual zircon grains were placed in one depression with a ruby ball on top to prevent the zircon from leaving the capsule, and the other depression was heated with a laser to a temperature of approximately 1400°C to extract helium. The extracted gas was spiked with a known aliquot of 3He, and the 4He/3He ratio was measured.The grain was then dissolved in HF within a pressurized bomb for approximately 48 hours. The sample was spiked with a known thorium and uranium content. Then the HF was evaporated, the sample was re-dissolved with HCl to break up any salts that could have formed between Th or U and F. Finally, the sample was dried down and heated slightly on a hot plate with HNO3 to run through the mass spectrometer. The Th and U isotopes were then measured on an inductively coupled mass spectrometer. The results were compared to a normal and a spike blank, and an age is calculated using a corrected mass that helps to account for helium ejection and diffusion from the grain (Farley 2002).

**1.4. Thermobarometry**

Electron microprobe analyses were performed using a JEOL8200 system (California Institute of Technology) except for sample 31001-5, which was analyzed with a Cameca SX50 microprobe (University of Arizona). Each system is equipped with 5 LiF, PET, and TAP crystal spectrometers. Major element concentrations were measured in point analyses at 15 kV accelerating voltage and a 25 nA beam current with 60 s count times, using natural and synthetic standards, and the CITZAF correction algorithm. Garnet analyses were done in spot mode, while plagioclase, hornblende, and biotite grains were measured using a 5 µm beam width.

Equilibrium *P-T* conditions were calculated from metamorphic pendant rocks using the internally consistent average *P-T* mode in THERMOCALC, version 3.26 (Powell and Holland, 1994; Holland and Powell, 1998). Thermobarometry was done on garnet-bearing metapelitic assemblages. *P-T* conditions for pendant rocks were calculated from garnet + cordierite + sillimanite + quartz (sample 31001-5), garnet + cordierite + andalusite + quartz + plagioclase + biotite (sample 08TC29), and garnet + sillimanite + plagioclase + quartz (sample 10SE41) assemblages interpreted, based on chemical and textural evidence, to have equilibrated during peak metamorphism. For metamorphic pendant samples, we use garnet rim compositions where Mg# is highest suggesting garnet growth at peak temperatures (Spear, 1993). All calculations were done assuming a water activity of unity, due to the abundance of hydrous phases.

Hornblende-plagioclase thermometry (Holland and Blundy, 1994) and aluminum-in-hornblende barometry (Hammarstrom and Zen, 1986; Hollister *et al*., 1987; Johnson and Rutherford, 1989; Schmidt, 1992; Anderson and Smith, 1995) were applied to plutonic assemblages interpreted, based on chemical and textural evidence, to have equilibrated during crystallization attending emplacement. We determine Al-in-hbl emplacement pressures and calculate temperatures from coexisting and texturally equilibrated hornblende and plagioclase from analyses of at least 3 hornblende-plagioclase pairs per sample. Anderson and Smith (1995) pressures were calculated by iteration using Holland and Blundy (1994) temperatures. Results from thermobarometric work and representative mineral compositions are summarized in Tables 3, 4, SD8, SD9, and SD10.

Samples 08SE463 and 08SE429, yielding Al-in-hbl pressures of 5.7 and 5.8 kbar, were collected from an ~100 m wide fault horse of an unnamed hornblende-clinopyroxene quartz monzonite that crops out along the Pastoria fault system between the Pastoria plate and lower plate San Emigdio schist (Figure 1). This fault sliver is interpreted to represent a tectonic fragment calved off the lower plate as the Pastoria plate descended structurally. We exclude these pressure determinations from autochthon-allochthon pressure differential calculations based on the structural setting of these samples.

**1.5. Geochemistry**

Two samples of basaltic sheeted dikes and one sample of pillow basalt from the WSEMC as well as two samples of dacitic metatuff from the Bean Canyon pendant were analyzed for major, minor, and trace elements by X-ray fluorescence (XRF) and inductively coupled plasma-mass spectrometry (ICP-MS). Weathering rinds and mineralized veins were removed to avoid contamination. Whole-rock compositions for WSEMC and Bean Canyon samples are presented in Table SD11. XRF measurements were done at the GeoAnalytical Laboratory of Washington State University following the methods of Johnson *et al*. (1999). ICP-MS analyses were done at the same facility using a combination fusion-dissolution method that effectively decomposes refractory mineral phases and removes the bulk of unwanted matrix elements. Of the WSEMC samples, 2 were analyzed for Sr and Nd isotopes by thermal ionization mass spectrometry (TIMS) at the University of Arizona (Table SD11).

**2. MULTIDIMENSIONAL SCALING OF U-PB DETRITAL ZIRCON DATA**

The Multidimensional scaling (MDS) method used in this study was inspired by Dr. Pieter Vermeesch, who graciously provided a Matlab script for MDS of U-Pb zircon ages. The first application of MDS to U-Pb detrital zircon age data can be found in Vermeesch (in review). The MDS mapping algorithm used to compare U-Pb detrital zircon spectra is as follows: 1) input square, symmetric matrix of Kolmogorov-Smirnov (K-S) distances between samples; 2) assign points to arbitrary coordinates in 2-dimensional space; 3) Compute K-S distances among all pairs of points, to form a new matrix; 4) Compare the new matrix with the input matrix by evaluating the stress function, a measure of the degree of correspondence between the observed and reproduced distances; 5) perturb the coordinates of each data point; and 6) repeat steps 2 through 5 until stress is minimized. The resuting 2-dimensional map (Figure 7) should be interpreted as follows. The degree of similarity in U-Pb detrital zircon age spectra is higher for samples that plot close to each other than for samples that are positioned farther apart. The reader is referred to Borg and Groenen (1997) for a comprehensive treatment of MDS.

**3. ZIRCON MORPHOLOGY AND U-PB AGE INTERPRETATIONS**

**3.1. Antimony Peak tonalite and San Emigdio tonalite**

Zircon grains in samples 08SE46, 08SE262, 08SE451, 08SE582, and 08SE675 are generally subhedral, ~ 50 – 350 µm in length, inclusion-poor, and exhibit simple oscillatory zoning patterns in CL images that we interpret as magmatic features. CL-dark cores are commonly overgrown by CL-bright rims up to ~35 µm wide in samples 08SE46 and 08SE675. While conventional zircon fractions yielded highly discordant U-Pb ages (James, 1986a, 1986b), *in* *situ* LA-MC-ICPMS analyses of core and rim regions are concordant with weighted mean ages of ca. 135 and 100 Ma, respectively. These ages are interpreted to reflect the timing of crystallization (cores) and deep crustal overgrowth (rims). A single aberrant grain in sample 08SE675, yielding an age of 485.0 ± 34.0 Ma, is interpreted here as related to source inheritance and/or entrainment of a Paleozoic or older zircon.

**3.2. San Emigdio gneiss**

Zircon grains in samples 07SE94 and 08SE450 are rounded to subrounded, ~100 – 200 µm in length, inclusion-poor, and preserve a faint and broad zoning texture. Weighted mean ages for the San Emigdio gneiss range from ca. 105-106 Ma.

**3.3. Digier Canyon/White Oak diorite gneiss**

Zircon grains in sample 08SE674 (quartz diorite) and 08SE679 (gabbro) are generally subhedral, ~100 – 300 µm in length, inclusion-poor, and exhibit broad zoning in ~95% of grains; the remainder contain convolute zoning domains that truncate the oscillatory zoning. Weighted mean ages of 120.6 ± 1.4 and 104.4 ± 4.2 for samples 08SE674 and 08SE679, respectively reflect the lithologic and structural variability of the White Oak tectonic unit. Earlier U-Pb zircon geochronologic studies (Saleeby *et al*., 1987, 2007) specifically avoided this unit owing to structural complexities and metamorphic overprinting adjacent to the Rand fault in the Tehachapi Mountains.

**3.4. Lebec granodiorite**

Zircon morphology and zoning vary widely in the Lebec body, depending mainly on the proximity of Salt Creek pendant rocks. Sample 04SE5 was collected over 200 m from the nearest exposure of pendant rocks, and contains 100 – 300 µm, subhedral zircon grains that exhibit oscillatory zoning. Samples 06SE19A and 08SE256 were collected adjacent to pendant assemblages and contain large (up to 1 cm) skeletal garnets in textural disequilibrium with the surrounding matrix and zircon grains that are subhedral, ~25 – 150 µm in length, and inclusion-poor with core regions exhibiting oscillatory zoning with local convolute zoning at the rims. Four grains of the 04SE5 and 08SE256 spectra, yielding aberrant ages of 97-102 Ma, are interpreted as a source inheritance and/or entrainment feature. Weighted mean ages for the Lebec granodiorite range from 88 – 92 Ma.

**3.5. Claraville granodiorite**

Samples 91TH181 and 93TH417 were collected from the Whiterock facies of the Claraville granodiorite (Ross, 1989; Wood, 1997), a medium grained porphyritic hornblende biotite granodiorite. The Tera-Wasserburg diagrams (Figure 5b) show concordant fractions at ca. 92 Ma, and slightly discordant fractions probably reflecting minor inheritance and/or entrainment of Proterozoic grains.

**3.6. Granodiorite of Gato Montes**

Zircon grains in sample 10TC5 are euhedral to subhedral, ~150 – 200 µm in length, inclusion poor, and exhibit oscillatory zoning. The weighted mean age of this sample is 92. 1 ± 1.0 Ma. The five grains that yield ages of ca. 104 Ma resemble the principal inherited component observed from Lebec granodiorite samples. The grain that yields an anomalous age of ca. 129 Ma is also attributed to source inheritance or entrainment.

**3.7. Granodiorite of Gamble Spring Canyon**

Large lensoidal bodies of this unit separate rocks of the Tylerhorse Canyon pendant from the more felsic granodiorite of Gato Montes (Ross, 1989) and lie within the metasedimentary sequence, possibly as dikes (Rindosh, 1977). Sample 08TC27 was collected from the northern margin of the Tylerhorse Canyon pendant. The interpreted age of this sample is 146.8 ± 0.4 Ma.

In the light of our new U-Pb geochronology, Rb-Sr ages of ca. 150 Ma (R. A. Fleck, written communication in Ross, 1977; 1989) from Bean Canyon metavolcanic rocks, originally thought to represent the age of volcanism, probably instead reflect isotopic disturbance owing to intrusion of the granodiorite of Gamble Spring Canyon.

**3.8. Granite of Brush Mountain**

Zircon grains in sample 08SE596 are euhedral to subhedral, ~ 50 – 200 µm in length, inclusion poor, and exhibit faint CL-dark oscillatory zoning. The interpreted age of this sample is 104.7 ± 0.9 Ma. A single aberrant age of 91.9 ± 3.0 Ma is probably due to isotopic disturbance of a labile grain. However, the U concentration (3141 ppm) and U/Th (4.7) for the aberrant grain are similar to those of other grains, suggesting that significant isotopic disturbance has not occurred. Dikelet contamination from the 1 km distant Lebec granodiorite is precluded, as the contact between the two bodies is clearly a fault (Chapman and Saleeby, in press) and microscale intrusions are not visible in thin section.

**3.9. White Ridge tonalite**

Zircon grains in sample 09SE23 are subhedral to subrounded, ~50 – 250 µm in length, inclusion-poor, and exhibit oscillatory and sector zoning. The weighted mean age of this sample is 154.2 ± 3.5 Ma.

**3.9. Metamorphic pendant rocks**

Zircon grains in these samples generally contain detrital cores characterized by igneous oscillatory zoning truncated by zones of metamorphic recrystallization and local development of patchy and convolute zoning along rims (Figure DR1). Metamorphic domains were avoided during analysis.

**4. SAMPLE PETROGRAPHY**

**4.1. Plutonic rocks**

***K16b-87***

South tonalite of Vergeles. Light gray, medium-grained hypidiomorphic-granular quartz monzodiorite. Biotite and hornblende are the dominant mafic minerals. Accessory minerals: sphene, apatite, epidote, and zircon. Local alteration of hornblende and biotite to chlorite.

***91TH181***

Claraville granodiorite, Mendiburu Canyon phase. Light gray, medium- to coarse-grained porphyritic hornblende biotite granodiorite. 1-2 cm K-feldspar phenocrysts in subhedral granular matrix. Accessory minerals: apatite, allanite, and zircon. Minor alteration of plagioclase to sericite and biotite to chlorite.

***93TH417***

Claraville granodiorite, Bootleg Canyon phase. Light gray, medium-grained, equigranular sphene hornblende biotite granodiorite. Cataclasis and hydrothermal alteration common. Quartz is commonly fractured, biotite are crinkled and chloritized, and plagioclase is saussuritized.

***94KK27***

Unnamed granodiorite. Light gray, medium-grained hornblende biotite granodiorite. Accessory sphene is euhedral with well-developed concentric zoning. Other accessory minerals: magnetite and zircon.

***04SE5***

Lebec granodiorite. Medium- to coarse-grained, light orange granular hornblende biotite granodiorite. Quartz, K-feldspar, and plagioclase have consertal texture. Interstitial hornblende is closely associated with biotite. Hornblende and biotite are variably chloritized. Plagioclase is sericitized. Minor zircon, sphene, and opaques.

***06SE19a***

Lebec granodiorite. Escapula Peak phase. Medium- to coarse-grained, light gray granular biotite granodiorite with skeletal garnet porphyroblasts. Quartz, K-feldspar, and plagioclase display consertal texture with interstitial biotite. Alteration is minor, with local chloritization of biotite and sericitation of plagioclase.

***07SE94***

San Emigdio gneiss. Brown, medium-grained, foliated, hornblende-bearing quartz diorite gneiss. 1 cm skeletal garnet porphyroblasts with trondhjemitic halos and blebby quartz inclusions. Minor biotite, ilmenite, rutile, zircon, K-feldspar, and apatite. Minor alteration of hornblende and garnet to chlorite. Quartz is undulose.

***08TC27a***

Granodiorite of Gamble Spring Canyon. Dark gray, medium- to coarse-grained, porphyritic granular, hornblende biotite granodiorite. Hornblende is closely associated with biotite. Accessory ilmenite, sphene, zircon, and apatite. Plagioclase is variably sericitized.

***08SE46***

San Emigdio tonalite. Gray, medium- to coarse-grained, weakly foliated biotite tonalite. Alteration is minor.

***08SE256***

Lebec granodiorite, Escapula Peak phase. Strongly sheared garnetiferous leuco-granodiorite collected adjacent to the Salt Creek pendant. K-feldspar and plagioclase phenocrysts and skeletal garnet porphyroblasts are set within a deformed quartz matrix. Quartz is characterized by grain boundary migration and strong crystallographic preferred orientation. Secondary chlorite and sericite are abundant. Minor biotite, opaques, and zircon.

***08SE262***

San Emigdio tonalite. Light pink, medium-grained, weakly foliated leucotonalite. Biotite makes up about 5 percent of this rock. Alteration is minor. The sampled outcrop is unconformably overlain (depositional contact) by the Uvas formation.

***08SE429***

Unnamed quartz monzonite. Light gray to green, medium-grained, equigranular monzonite. Mafic minerals include hornblende and clinopyroxene. Alteration of hornblende by chlorite and plagioclase by sericite is common. Minor apatite and opaques.

***08SE450***

San Emigdio gneiss. Brown, medium-grained, foliated, hornblende-bearing quartz diorite gneiss. Strong shape preferred orientation in hornblende. Minor biotite, ilmenite, K-feldspar, zircon, and epidote. Minor alteration of hornblende to chlorite and plagioclase to sericite. Biotite-rich shear bands anastomose through sample and outcrop.

***08SE451***

Antomony Peak tonalite. Light gray, medium- to coarse-grained, porphyritic, massive to penetratively foliated, hornblende-biotite tonalite containing mainly plagioclase, quartz, hornblende, and K-feldspar, with minor amounts of garnet, biotite, epidote, apatite, sphene, and ilmenite. Where hypidiomorphic granular (igneous) textures are not overprinted by metamorphic foliation, the epidote occurs as subhedral replacement products of embayed hornblende and retains distinct core and rim regions, consistent with a magmatic origin. Original petrographic relationships are locally obscured by extensive seritization and chloritization. Hornblende-rich mafic schlieren are found in the same outcrop as 08SE451.

***08SE463***

Unnamed quartz monzonite. Gray, coarse-grained, equigranular hornblende clinopyroxene quartz monzonite. Mafic minerals, plagioclase, and K-feldspar are highly altered to sericite, chlorite, and secondary epidote. Minor apatite, calcite, and opaques.

***08SE582***

Antomony Peak tonalite. Light gray, medium-grained, porphyritic, foliated, hornblende tonalite. Epidote phenocrysts embayed in hornblende. Minor K-feldspar, apatite, zircon, and ilmenite. Plagioclase, epidote, and hornblende are altered to chlorite, sericite, and opaques. Approximately 5µm-wide cross-cutting veins filled with secondary epidote, apparently injecting the host rock, may represent devitrified pseudotachylyte.

***08SE596***

Granite of Brush Mountain. Light pink, coarse-grained, granular biotite granite. Porphyritic K-feldspar is microperthitic. Accessory zircon. Biotite is somewhat chloritized and plagioclase is sericitized.

***08SE674***

Digier Canyon quartz diorite gneiss. Foliated, dark green to black, hornblende-bearing quartz diorite. Minor rutile, ilmenite, apatite, zircon, K-feldspar, and secondary chlorite and sericite.

***08SE675***

San Emigdio tonalite. Foliated garnet-biotite leucotonalite. Similar in appearance to the 101 Ma “Garnet-biotite tonalite of Grapevine” of Pickett and Saleeby (1993, 1994). Epidote phenocrysts embayed in biotite. Garnet is 0.5-1 mm in diameter with blebby quartz inclusions. Accessory minerals include zircon, apatite, and opaques. Very little alteration. Radiation-damage halos surrounding zircon inclusions in biotite are common.

***08SE679***

Digier Canyon quartz diorite gneiss. Brownish-green, medium-grained, hornblende-clinopyroxene gabbro. Weakly developed solid state foliation. Clinopyroxene are altered to epidote, sericite, and chlorite and are found within hornblende cores. Secondary sphene, opaques, and zircon.

***10SE1***

Granite of Brush Mountain. Dark brown, fine- to medium-grained hornblende gabbro enclave. Rock is essentially bimineralic (hornblende + plagioclase) with minor K-feldspar, quartz, and ilmenite. Alteration of K-feldspar to sericite and hornblende to chlorite are common.

***10TC5***

Granodiorite of Gato Montes. Light orange-brown medium-grained biotite granodiorite. Dark brown biotite cores locally stained red due to chlorite alteration. Minor alteration of plagioclase to sericite. Accessory minerals: ilmenite, apatite, zircon, and monazite.

**4.2. Metamorphic pendant rocks**

***91TH140***

Oaks metavolcanics. Metamorphosed pumice lapilli silicic tuff: finely recrystallized laminated tuff with remnants of fine quartz phenocrysts, pumice lapilli recrystallized to biotite+quartz, and faintly schistose groundmass consisting of quartz, feldspar, biotite and sericite.

***31001-5***

Sur series metapelitic schist. Garnet + cordierite + sillimanite + quartz + K-feldspar + biotite metapelitic schist with secondary plagioclase and muscovite. Cordierite is locally altered to pinite, K-feldspar is microperthitic, and garnet is homogeneous with Mn "kick-ups" at rims. Accessory minerals: zircon and ilmenite.

***07BC60***

Bean Canyon pendant quartzite. Nearly pure quartzite with minor biotite, muscovite, plagioclase, and andalusite. Biotite define a faint foliation surrounded by polygonal aggregates of quartz.

***07TM10***

Bean Canyon pendant metavolcanics. Metamorphosed porphyritic silicic tuff. 1-5 mm plagioclase porphyroblasts are set in a fine-grained and annealed (120˚ grain boundaries in quartz) quartz+biotite schistose matrix. Relict pumice lapilli recrystallized to biotite+quartz. Plagioclase is mildly sericitized. Accessory zircon and opaques.

***11BC1***

Felsic segregation from Bean Canyon pendant amphibolite. Probably the metamorphic equivalent of a plagiogranite. Predominantly plagioclase + quartz, with < 20% clinopyroxene, hornblende, and ilmenite and minor biotite, sphene, andalusite, cordierite, and zircon. Thin (1-5 mm) folia of clinopyroxene + hornblende are spaced 1-10 mm apart and separated by annealed quartz + feldspar aggregates.

***08TC29***

Tylerhorse Canyon pendant metapelitic schist. Garnet + cordierite + andalusite + quartz + plagioclase + biotite metapelitic schist. Foliation is characterized by alternating garnet-rich and garnet-poor bands. Garnet is homogeneous. Alteration is minor.

***08TC44***

Tylerhorse Canyon pendant impure quartzite. Quartz + muscovite + biotite + cordierite + andalusite + tourmaline metasandstone. Polygonal aggregates of quartz define an annealed texture. Accessory tourmaline, zircon, and graphite are especially prevalent in veins.

***08SE258***

Salt Creek pendant metaturbidite. Sillimanite + cordierite + biotite + muscovite + plagioclase + quartz metapsammite. The foliation consists of alternating sillimanite + biotite and quartz + plagioclase layers. Plagioclase is highly sericitized. Blocky pods of fibrolitic sillimanite probably represent pseudomorphs after andalusite. Adjacent sample 08SE259 contains garnet porphyroblasts.

***10SE41***

Salt Creek pendant migmatitic gneiss. Garnet + sillimanite + plagioclase + quartz + biotite migmatitic gneiss with accessory hornblende, ilmenite, and zircon. The rock contains ~1 cm garnet and sillimanite porphyroblasts in a granular matrix. Dikelets of host Lebec granodiorite truncate gneissose foliation. Garnet is homogeneous. Alteration is minor.

**4.3. Western San Emigdio mafic complex**

***09SE21A***

Metamorphosed sheeted dike. Hornfelsic groundmass consists mainly of hornblende and recrystallized plagioclase laths. Epidote + calcite veins truncate sample. The equilibrium assemblage of hornblende + plagioclase + epidote suggests metamorphism at albite-epidote hornfels to hornblende hornfels facies.

***09SE21B***

Metamorphosed sheeted dike. Sample is coarser grained than 09SE21A, yet still exhibits hornfelsic texture. Groudmass consists mainly of hornblende and diopsidic clinopyroxene. Plagioclase lath relics (up to 0.5 mm) are better-preserved than 09SE21A. Epidote-, garnet-, and calcite-filled endoskarn veins truncate the sample. The equilibrium assemblage of hornblende + clinopyroxene + plagioclase suggests metamorphism at hornblende hornfels facies.

***09SE23***

White Ridge tonalite. Gray, coarse-grained, granular hornblende tonalite. Plagioclase is sericitized.

***09SE32B***

Metamorphosed pillow basalt with hornfelsic texture. Groudmass consists mainly of hornblende and plagioclase lath relics with scattered epidote. The equilibrium assemblage of hornblende + plagioclase + epidote suggests metamorphism at albite-epidote hornfels to hornblende hornfels facies.

**5. CORRELATIVE GRANITOIDS**

The granodiorites of Claraville, Gato Montes, Lebec, and the granites of Tejon Lookout, Brush Mountain, Tehachapi Airport, and Bean Canyon (Figure 1) constitute the vast majority of plutonic rocks exposed in the area surrounding correlations 1-4, discussed below (Ross, 1989). The granodiorites are nearly identical in field appearance, petrography, major and trace element geochemistry, and Sri, which led Ross (1989) and Kistler and Ross (1990) to correlate the units. U-Pb geochronology yields identical emplacement ages of 91 ± 1 (Saleeby *et al*., 1987; 2008), 92 ± 1, and 90 ± 2 for Claraville, Gato Montes, and Lebec bodies, respectively. Exposures of biotite hornblende granodiorite and biotite granite in the Rand Mountains (Nourse, 1989) are probably correlative with aforementioned granodiorite and granite units, yet are not studied in sufficient detail to permit correlation.

Ross (1989) interpreted the granites of Brush Mountain and Tejon Lookout to intrude the granodiorites of Lebec and Gato Montes, respectively. However, new field mapping (Chapman and Saleeby, in press) indicates that the contact, where exposed, is a shallowly dipping fault characterized by narrow (< 10 m) zones of cataclasis and hydrothermal alteration. This reinterpretation is compatible with older U-Pb zircon ages in the granites, ranging from 105 to 98 Ma (James, 1986b, and this study), than in the granodiorites. Similar low angle fault contact relations are documented between “Plate III” granodiorite and “Plate IV” granite in the Rand Mountains (Nourse, 1989).

**REFERENCES**

Ague, J. J., and Brimhall, G. H., 1988, Magmatic arc asymmetry and distribution of anomalous plutonic belts in the batholiths of California; effects of assimilation, crustal thickness, and depth of crystallization: *Geological Society of America Bulletin*, **100**(6), 912-927.

Anderson, J. L., and Smith, D. R., 1995, The effects of temperature and fO2 on the Al-in-hornblende barometer: *American Mineralogist*, **80**(5-6), 549-559.

Barth, A. P., Wooden, J. L., Grove, M., Jacobson, C. E., and Pedrick, J. N., 2003, U-Pb zircon geochronology of rocks in the Salinas Valley region of California; a reevaluation of the crustal structure and origin of the Salinian Block: *Geology*, **31**(6), 517-520.

Bartley, J.M., Glazner, A. F., Coleman, D. S., Kylander-Clark, A.R.C., and Friedrich, A.M., 2007, Large Laramide dextral offset across Owens Valley, California, and its possible relation to tectonic unroofing of the southern Sierra Nevada, in Till, A. B., Roeske, S. M., Foster, D. A. and Sample, J. C., eds., Exhumation Processes Along Major Continental Strike-slip Fault Systems: *Geological Society of America Special Paper*, **434**, 129-148.

Bateman, P. C., 1992, Plutonism in the central part of the Sierra Nevada Batholith, California: *U.S. Geological Survey Professional Paper* 1483, 186 pp.

Borg, I., and Groenen, P. J. F., 1997, Modern multidimensional scaling: Theory and applications, New York, Springer, 471 pp.

Brady, R., Ducea, M., Kidder, S., and Saleeby, J., 2006, The distribution of radiogenic heat production as a function of depth in the Sierra Nevada Batholith, California: *Lithos*, **86**, 229-244.

Busby-Spera, S. C. J., 1982, Paleogeographic reconstruction of a submarine volcanic center: geochronology, volcanology and sedimentology of the Mineral King roof pendant, Sierra Nevada, California. PhD thesis, Princeton University, 290 pp.

Chapman, A. D. and Saleeby, J., in press, Geologic map of the San Emigdio Mountains: *Geological Society of America Map and Chart Series*, MCH-101.

Chapman, A. D., Luffi, P., Saleeby, J., and Petersen, S., 2011, Metamorphic evolution, partial melting, and rapid exhumation above an ancient flat slab: Insights from the San Emigdio Schist, southern California: *Journal of Metamorphic Geology*, **29**, 601-626, doi: 10.1111/j.1525-1314.2011.00932.x.

Chen, J.H., and Moore, J.G., 1982, Uranium-lead isotopic ages from the Sierra Nevada batholith: *Journal of Geophysical Research*, **87**, 4761-4784.

Chen, J. H., and Tilton, G. R., 1991, Applications of lead and strontium isotopic relationships to the petrogenesis of granitoid rocks, central Sierra Nevada batholith, California: *Geological Society of America Bulletin*, **103**, 439–447.

Chen, J. H., and Wasserburg, G. J., 1981, Isotopic determination of uranium in picomole and subpicomole quantities: *Analytical Chemistry*, **53**(13), 2060-2067.

Clemens-Knott, D., and Saleeby, J.B., 1999, Impinging ring dike complexes in the Sierra Nevada batholith, California: Roots of the Early Cretaceous volcanic arc: *Geological Society of America Bulletin*, **111**, 484–496, doi: 10.1130/0016-7606(1999)111<0484:IRDCIT>2.3.CO;2.

Coleman, D. S. and Glazner, A. F. (1998) The Sierra Crest magmatic event: rapid formation of juvenile crust during the Late Cretaceous in California. In: Ernst, W. G. and Nelson, C. A. (eds.) *Integrated Earth and environmental evolution of the Southwestern United States: the Clarence A. Hall, Jr. volume.* Columbia, MD: Bellwether Publishing. 253-272.

Coleman, D. S., Briggs, S., Glazner, A. F. and Northrup, C. J., 2003, Timing of plutonism and deformation in the White Mountains of eastern California. *Geological Society of America Bulletin*, **115**, 48-57.

Coleman, D. S., Gray, W. and Glazner, A. F., 2004, Rethinking the emplacement and evolution of zoned plutons: geochronologic evidence for incremental assembly of the Tuolumne Intrusive Suite, California. *Geology*, **32**, 433-436.

DeCrisoforo, D. T., and Cameron, K. L., 1977, Petrology of sillimanite-K-spar zone metapelites from Ben Lomond Mountain, central Coast Ranges, California: *Abstracts with Programs Geological Society of America*, **9**, 411.

DePaolo, D. J., 1981, A neodymium and strontium isotopic study of the Mesozoic calc-alkaline granitic batholiths of the Sierra Nevada and Peninsular Ranges, California. *Journal of Geophysical Research*(B 86), 10470-10488.

Dickinson, W.R., Ducea, M., Rosenberg, L.I., Greene, H.G., Graham, S.A., Clark, J.C., Weber, G.E., Kidder, S., Ernst, G.W., and Brabb, E.E., 2005, Net dextral slip, Neogene San Gregorio-Hosgri fault zone, coastal California; geologic evidence and tectonic implications: *Geological Society of America Special Paper*, **391**, 43 pp.

Dixon, E. T., 1995, 40Ar/39Ar hornblende geochronology and evaluation of garnet and hornblende barometry, Lake Isabella and the Tehachapi area, southern Sierra Nevada, California: M.S. thesis, University of Michigan, 63 pp.

Dunne, G. C., Walker, J. D., 2004, Structure and evolution of the east Sierran thrust system, east-central California, *Tectonics*, **23**, doi:10.1029/2002TC001478.

Ernst, W. G., Coleman, D. S. and Van de Ven, C. M., 2003, Petrochemistry of granitic rocks in the Mount Barcroft area: implications for arc evolution, central White Mountains, easternmost California. *Geological Society of America Bulletin*, **115**, 499-512.

Farley, K. A., 2002, (U-Th)/He Dating: Techniques, Calibrations, and Applications, *Reviews in Mineralogy and Geochemistry*, **47**, 819-844.

Fletcher, J. M., J. S. Miller, M. W. Martin, S. S. Boettcher, A. F. Glazner, and J. M. Bartley (2002), Cretaceous arc tectonism in the Mojave Block: Pro- found crustal modification that controlled subse- quent tectonic regimes, in Geologic Evolution of the Mojave Desert and Southwestern Basin and Range, edited by A. F. Glazner, J. D. Walker, and J. M. Bartley, *Geological Society of America Memoir*, **195**, 131–149, doi:10.1130/0-8137-1195-9.131.

Frost, T. P., and Mahood, C. A., 1987, Field, chemical, and physical constraints on mafic–felsic magma interaction in the Lamarck Granodiorite, Sierra Nevada, California: *Geololgical Society of America Bulletin*, **99**, 272–291.

Gaschnig, R. M., Coleman, D. S. and Glazner, A. F., 2006, Twin of the Tuolumne: new geochronology from the Mono Pass intrusive suite. *Geological Society of America Abstracts with Programs*, **38**, 559.

Gehrels, G., Valencia, V., and Pullen, A., 2006, Detrital zircon geochronology by laser-ablation multicollector ICPMS at the Arizona Laserchron Center: *The Paleontological Society Papers*, **12**, 67-76.

Hammarstrom, J. M., and Zen, E. a., 1986, Aluminum in hornblende; an empirical igneous geobarometer: *American Mineralogist*, **71**(11-12), 1297-1313.

Hanson, R. B., Saleeby, J. B. and Fates, D. G., 1987, Age and tectonic setting of Mesozoic metavolcanic and metasedimentary rocks, northern White Mountains, California. *Geology*, **15**, 1074-1078.

Hill, M., O’Neil, J. R., Noyes, H., Frey, F. A. and Wones, D. R. (1988). Sr, Nd, and O isotope variations in compsitionally zoned and unzoned plutons in the central Sierra Nevada batholith: *American Journal of Science*, **288-A**, 213-214.

Hollister, L. S., Grissom, G. C., Peters, E. K., Stowell, H. H., and Sisson, V. B., 1987, Confirmation of the empirical correlation of Al in hornblende with pressure of solidification of calc-alkaline plutons: *American Mineralogist*, **72**(3-4), 231-239.

Holland, T., and Blundy, J., 1994, Non-ideal interactions in calcite amphiboles and their bearing on amphibole-plagioclase thermometry: *Contributions to Mineralogy and Petrology*, **116**(4), 433-447.

Holland, T. J. B., and Powell, R., 1998, An internally consistent thermodynamic data set for phases of petrological interest: *Journal of Metamorphic Geology*, **16**(3), 309-343.

Irwin, W. P., and Wooden, J. L., 2001, Map Showing Plutons and Accreted Terranes of the Sierra Nevada, California with a Tabulation of U/Pb Isotopic Ages, *U.S. Geological Survey Open-File Report* 01-229.

Jaffey, A. H., Flynn, K. F., Glendenin, L. E., Bentley, W. C., and Essling, A. M., 1971, Precision Measurement of Half-Lives and Specific Activities of 235U and 238U: *Physical Review*, **C4**(5), 1889-1906.

James, E. W., 1986a Geochronology, isotopic characteristics, and paleogeography of parts of the Salinian Block of California. Ph.D. thesis, University of California, 176 pp.

James, E. W., 1986b, U/Pb age of the Antimony Peak tonalite and its relation to Rand Schist in the San Emigdio Mountains, California: *Geological Society of America Abstracts with Programs*, **18**(2), 121.

John, D., 1981, Structure and petrology of pelitic schist in the Fremont Peak Pendant, northern Gabilan Range, California: *Geological Society of America Bulletin*, **92**(5), 237-246.

Johnson, D. M., Hooper, P. R., and Conrey, R. M., 1999, XRF Analysis of Rocks and Minerals for Major and Trace Elements on a Single Low Dilution Li-tetraborate Fused Bead: *Advances in X-Ray Analysis*, **41**, 843-867.

Johnson, M. C., and Rutherford, M. J., 1989, Experimental calibration of the aluminum-in-hornblende geobarometer with application to Long Valley Caldera (California) volcanic rocks: *Geology*, **17**(9), 837-841.

Kellogg, K.S., 1999, Geologic map of the Lockwood Valley quadrangle, Ventura County, California: *U.S. Geological Survey Open-File Report* 99–130, scale 1:24,000.

Kidder, S., Ducea, M., Gehrels, G. E., Patchett, P. J., and Vervoort, J., 2003, Tectonic and magmatic development of the Salinian Coast Ridge Belt, California: *Tectonics*, **22**, doi:10.1029/2002TC001409.

Kistler, R. W., and Champion, D. E., 2001, Rb-Sr whole-rock and mineral ages, K-Ar, 40Ar/39Ar, and U-Pb mineral ages, and strontium, lead, neodymium, and oxygen isotopic compositions for granitic rocks from the Salinian Composite Terrane, California: *U.S. Geological Survey Open-File Report*, 01-453, 84 pp.

Kistler, R. W. and Fleck, R. J. (1994). Field guide for a transect of the central Sierra Nevada, California: geochronology and isotope geology. *U.S. Geological Survey, Open-File Report* 94-0267, 50 pp.

Kistler, R. W. and Lee, D. E., 1989, Rubidium and strontium isotopic data for a suite of granitoid rocks from the Basin and Range Province, Arizona, California, Nevada, and Utah: *U.S. Geological Survey Open-File Report* 89-199, 13pp.

Kistler, R. W., and Peterman, Z., 1973, Variations in Sr, Rb, K, Na and initial 87Sr/86Sr in Mesozoic granitic rocks and intruded wall rocks in central California: *Geological Society of America Bulletin*, **84**, 3489-3512.

Kistler, R. W. and Peterman, Z. E., 1978, Reconstruction of crustal blocks of California on the basis of initial strontium isotopic com- positions of Mesozoic granitic rocks. *U.S. Geological Survey Professional Paper* 1071, 17 pp.

Kistler, R. W., and Ross, D. C., 1990, A strontium isotopic study of plutons and associated rocks of the southern Sierra Nevada and vicinity, California: *U. S. Geological Survey Bulletin* 1920, 20 pp.

Kistler, R. W. and Swanson, S. E., 1981, Petrology and geochronology of metamorphosed volcanic rocks and a Middle Cretaceous volcanic neck in the east-central Sierra Nevada, California. *Journal of Geophysical Research*, **B 86**, 10489-10501.

Kistler, R. W., Chappell, B. W., Peck, D. L., and Bateman, P. C., 1986, Isotopic variation in the Tuolumne Intrusive Suite, central Sierra Nevada, California: *Contributions to Mineralogy and Petrology*, **94**, 205–220.

Krogh, T. E., 1973, A low-contamination method for hydrothermal decomposition of zircon and extraction of U and Pb for isotopic age determinations: *Geochimica et Cosmochimica Acta*, **37**(3), 485-494.

Lackey, J. S., Valley, J. W., Chen, J. H., and Stockli, D. F., 2008, Dynamic Magma Systems, Crustal Recycling, and Alteration in the Central Sierra Nevada Batholith: the Oxygen Isotope Record: *Journal of Petrology*, **49**(7), 1397-1426.

Ludwig, K. R., 2003, Mathematical-statistical treatment of data and errors for 230Th/U geochronology: *Reviews in Mineralogy and Geochemistry*, **52**, 631-656.

Mahan, K.H., Bartley, J.M., Coleman, D.S., Glazner, A.F., and Carl, B.S., 2003, Sheeted intrusion of the syn- kinematic McDoogle Pluton, Sierra Nevada, California: *Geological Society of America Bulletin*, **115**, 1570–1582, doi: 10.1130/B22083.1.

Mahéo, G., Saleeby, J., Saleeby, Z., and Farley, K. A., 2009, Tectonic control on southern Sierra Nevada topography, California: *Tectonics*, **28**(6), TC6006.

Martin, M. W., Walker, J. D., and Fletcher, J. M., 2002, Timing of Middle to Late Jurassic ductile deformation and implications for paleotectonic setting, Shadow Mountains, western Mojave Desert, *California Geological Society of America Memoirs,* **195**, 43-58.

Masi, U., O’Neil, J. R. and Kistler, R. W., 1981, Stable isotope systema- tics in Mesozoic granites of central and northern California and southwestern Oregon. *Contributions to Mineralogy and Petrology*, **76**, 116-126.

McNulty, B. A., Tobisch, O. T., Cruden, A. R. and Gilder, S., 2000, Multistage emplacement of the Mount Givens Pluton, central Sierra Nevada Batholith, California. *Geological Society of America Bulletin*, **112**, 119-135.

Miller, J.S., Glazner, A.F., Walker, J.D., and Martin, M.W., 1995, Geochronologic and isotopic evidence for Triassic-Jurassic emplacement of the eugeoclinal allochthon in the Mojave Desert region, California: *Geological Society of America Bulletin*, **107**, 1441–1457, doi: 10.1130/0016–7606(1995)1072.3.CO;2.

Miller, J.S. and Glazner, A.F., 1995, Jurassic plutonism and crustal evolution in the central Mojave Desert, California: *Contributions to Mineralogy and Petrology*, **118**, 379-395.

Nadin, E. S., 2007, Structure and history of the Kern Canyon fault system, southern Sierra Nevada, California: Ph.D. thesis, California Institute of Technology, 296 pp.

Nourse, J. A., 1989, Geological evolution of two crustal scale shear zones; Part I, The Rand thrust complex, northwestern Mojave Desert, California; Part II, The Magdalena metamorphic core complex, north central Sonora, Mexico. Ph.D. thesis, California Institute of Technology, 394 pp.

Pickett, D. A., and Saleeby, J. B., 1993, Thermobarometric constraints on the depth of exposure and conditions of plutonism and metamorphism at deep levels of the Sierra Nevada Batholith, Tehachapi Mountains, California: *Journal of Geophysical Research*, **98**(B1), 609-629.

Pickett, D. A., and Saleeby, J. B., 1994, Nd, Sr, and Pb isotopic characteristics of Cretaceous intrusive rocks from deep levels of the Sierra Nevada Batholith, Tehachapi Mountains, California: *Contributions to Mineralogy and Petrology*, **118**(2), 198-215, doi: 110.1007/BF01052869.

Powell, R., and Holland, T., 1994, Optimal geothermometry and geobarometry: *American Mineralogist*, **79**(1-2), 120-133.

Ratajeski, K., Glazner, A. F. and Miller, B. V., 2001, Geology and geochemistry of mafic to felsic plutonic rocks in the Cretaceous intrusive suite of Yosemite Valley, California. *Geological Society of America Bulletin*, **113**, 1486-1502.

Reiners, P. W., 2005, Zircon (U-Th)/He thermochronometry: *Reviews in Mineralogy and Geochemistry*, **58**(1), 151-179.

Robinson, A. C. and Kistler, R. W. (1986) Maps showing isotopic dating in the Walker Lake 1 degrees by 2 degrees Quadrangle, California and Nevada. *U. S. Geological Survey Miscellaneous Field Studies Map* MF-1382-N, **49**, 3 sheets, 1:250,000.

Ross, D. C., 1977, Pre-intrusive metasedimentary rocks of the Salinian block, California; a paleotectonic dilemma, *in* Stewart, J. H., Stevens, C. H., and Fritsche, A. E., eds., *Paleozoic paleogeography of the western United States: Pacific Section, Society of Economic Paleontologists and Mineralogists Pacific Coast Paleogeography Symposium* **1**, 371-380.

Ross, D. C., 1989, The metamorphic and plutonic rocks of the southernmost Sierra Nevada, California, and their tectonic framework: *U.S. Geological Survey Professional Paper* 1381, 159 pp.

Saleeby, J., 2011, Geochemical mapping of the Kings-Kaweah ophiolite belt, California - evidence for progressive melange formation in a large offset transform-subduction initiation environment: *Geological Society of America Special Paper* (in press).

Saleeby, J., and Dunne, G. C., in press, Temporal and Structural Relations of Early Mesozoic Arc Plutonism, southern Sierra Nevada, California: *Geological Society of America Bulletin*.

Saleeby, J. B., Ducea, M. N., Busby, C. J., Nadin, E. S., and Wetmore, P. H., 2008, Chronology of pluton emplacement and regional deformation in the southern Sierra Nevada Batholith, California: *Geological Society of America Special Paper*, **438**, 397-427.

Saleeby, J., Farley, K. A., Kistler, R. W., and Fleck, R. J., 2007, Thermal evolution and exhumation of deep-level batholithic exposures, southernmost Sierra Nevada, California: *Geological Society of America Special Paper*, **419**, 39-66.

Saleeby, J. B., Sams, D. B., and Kistler, R. W., 1987, U/Pb zircon, strontium, and oxygen isotopic and geochronological study of the southernmost Sierra Nevada Batholith, California: *Journal of Geophysical Research*, **92**(B10), 10,443-10,466.

Saleeby, J. B., Geary, E. E., Paterson, S. R., and Tobisch, O. T., 1989, Isotopic systematics of Pb/U (zircon) and 40Ar/39Ar (biotite-hornblende) from rocks of the central Foothills terrane, Sierra Nevada, California: *Geological Society of America Bulletin*, **101**(11), 1481-1492.

Saleeby, J. B., 1990, Progress in tectonic and petrogenetic studies in an exposed cross– section of young (~100 Ma) continental crust, southern Sierra Nevada, California, *in*, Salisbury, M. H., ed.: *Exposed Cross Sections of the Continental Crust*, D. Reidel Publishing Co., Dordrecht, Holland, 137–158.

Sawka, W. N., Chappell, B. W., and Kistler, R. W., 1990, Granitoid compositional zoning by side-wall boundary layer differentiation: Evidence from the Palisade Crest intrusive suite, central Sierra Nevada, California, *Journal of Petrology*, **31**, 519-553.

Schmidt, M. W., 1992, Amphibole composition in tonalite as a function of pressure; an experimental calibration of the Al-in-hornblende barometer: *Contributions to Mineralogy and Petrology*, **110**(2-3), 304-310.

Schweickert, R. A. and Lahren, M. M., 1999, Triassic caldera at Tioga Pass, Yosemite National Park, California: structural relationships and significance. *Geological Society of America Bulletin*, **111**, 1714-1722.

Silver, L. T., and Nourse, J. A., 1991, Timing of the Rand thrust and its implications for Late Cretaceous tectonics in southern California: *Geological Society of America Abstracts with Programs*, **23**(5), A480.

Spear, F. S., 1993, Metamorphic phase equilibria and pressure-temperature-time paths, Washington, D.C., Mineralogical Society of America, 799 p.

Stacey, J. S., and J. D. Kramers, 1975, Approximation of terrestrial lead isotope evolution by a two-stage model, *Earth and Planetary Science Letters*, **26**, 207–221.

Stern, T. W., Bateman, P. C., Morgan, B. A., Newell, M. F., and Peck, D. L., 1981, Isotopic U-Pb ages of zircon from the granitoids of the central Sierra Nevada, California: *U. S. Geological Survey Professional Paper* 1185, 19 pp.

Tindle, A. G., and Webb, P. C., 1994, PROBE-AMPH; a spreadsheet program to classify microprobe-derived amphibole analysis: *Computers & Geosciences*, **20**, 7-8.

Tobisch, O. T. and Cruden, A. R., 1995, Fracture-controlled magma conduits in an obliquely convergent continental magmatic arc: *Geology*, **23**, 941-944.

Vermeesch, P., in review, On the visualisation and intercomparison of detrital age distributions, *Earth and Planetary Science Letters*.

Wenner, J. M. and Coleman, D. S., 2004, Magma mixing and Cretaceous crustal growth: geology and geochemistry of granites in the central Sierra Nevada batholith, California. *International Geology Review*, **46**, 880-903.

**Figure captions**

**Figure SD1** Representative cathodoluminescence images of selected zircon grains from samples 08SE46 (a and b), 08SE451 (c), 08SE675 (d), 08SE450 (e), 08SE674 (f), 04SE5 (g), 10TC5 (h), 06SE19a (i), 08SE596 (j), 09SE23 (k), 11BC1 (l), 08SE258 (m), and 07BC60 (n and o).

**Figure SD2.** Composite zonation profiles from four Sur Series garnet grains (sample 31001-5). Note decreasing Mg# and Mn “kick-ups” at the rims.

**Animations**

**Movie SD1.** Movie illustrating the timing of fault activity and events surrounding extensional collapse of the southern Sierra Nevada batholith and vicinity. Red faults active; black faults inactive.

**Tables**

**Table SD1** LA-MC-ICPMS U-Pb zircon data for plutonic and metavolcanic rocks of the southern Sierra Nevada batholith.

**Table SD2.** ID-TIMS U-Pb zircon data for plutonic and metavolcanic rocks of the southern Sierra Nevada batholith.

Notes:

* Radiogenic; nonradiogenic correction based on 25 picogram blank Pb as determined by periodic measurements and initial Pb determinations from Saleeby *et al*. (2008) of 1:18.632:15.601:38.735.

§ Decay constants used in age calculations: l 238U = 1.55125 x 10-10  λ235U= 9.8485x10-10 (Jaffey *et al*., 1971); 238U/235U atom = 137.88 (Chen and Wasserberg, 1981). Uncertainties in 206Pb*/238U and 207Pb*/206Pb* are given as ± 2σ in last two figures.

**Table SD3.** LA-MC-ICPMS U-Pb detrital zircon data for metamorphic pendant rocks of the southern Sierra Nevada batholith.

**Table SD4.** Compilation of U-Pb zircon ages from the Sierra Nevada batholith.

**Table SD5.** Compilation of Sri ratios from the Sierra Nevada batholith.

**Table SD6.** Compilation of pressures calculated from aluminum-in-hornblende barometry and conventional thermobarometry from the Sierra Nevada batholith.

**Table SD7.** Detailed (U-Th)/He replicates data.

**Table SD8.** Representative mineral analyses used in thermobarometric calculations. Garnet normalized to 12 O, biotite normalized to eight cations, plagioclase normalized to 8 O, cordierite normalized to 18 O. Ferric iron calculated using the program AX (Holland and Powell, 1998). Mineral abbreviations: ab, albite; an, anorthite; alm, almandine; grs, grossular; prp, pyrope; sps, spessartine.

**Table SD9.** Representative hornblende analyses used in aluminum-in-hornblende pressure calculations.

Notes:

* determined using Probe-AMPH (Tindle and Webb, 1994).

**Table SD10.** Representative plagioclase analyses used in hornblende-plagioclase temperature calculations. Ferric iron calculated using the program AX (Holland and Powell, 1998).

**Table SD11.** Summary of sample locations, rock units, major and trace element geochemistry, and isotopic data from the western San Emigdio mafic complex and the Bean Canyon pendant.

Notes:

a UTM coordinates are WGS datum, zone 11N.

* total Fe reported as FeO
