# Supplementary material
Source: publisher figshare collection journal article supplement (https://gsapubs.figshare.com/ndownloader/files/22398732)
Supplement: Supplementary file 1 [file 22398732 › SD_T1.pdf]

**Table SD1** LA-MC-ICPMS U-Pb zircon data for plutonic and metavolcanic rocks of the southern Sierra Nevada batholith.

| Analysis                                     | U<br>(ppm) | <sup>206</sup> Pb<br><sup>204</sup> Pb | U/Th | Isotope ratios     |      |                    |      |                    |     |             | Isotopic ages (Ma) <sup>§</sup> |      |                    |       |                    |        |
|----------------------------------------------|------------|----------------------------------------|------|--------------------|------|--------------------|------|--------------------|-----|-------------|---------------------------------|------|--------------------|-------|--------------------|--------|
|                                              |            |                                        |      | <sup>206</sup> Pb* | ±    | <sup>207</sup> Pb* | ±    | <sup>206</sup> Pb* | ±   | Error       | <sup>206</sup> Pb*              | ±    | <sup>207</sup> Pb* | ±     | <sup>206</sup> Pb* | ±      |
|                                              |            |                                        |      | <sup>207</sup> Pb* | (%)  | <sup>235</sup> U*  | (%)  | <sup>238</sup> U   | (%) | correlation | <sup>238</sup> U                | (Ma) | <sup>235</sup> U*  | (Ma)  | <sup>207</sup> Pb* | (Ma)   |
| <i>Sample 08SE46 Antimony Peak tonalite</i>  |            |                                        |      |                    |      |                    |      |                    |     |             |                                 |      |                    |       |                    |        |
| 08SE46-01                                    | 333        | 8700                                   | 2.5  | 19.7945            | 11.0 | 0.1582             | 12.1 | 0.0227             | 5.1 | 0.42        | 144.8                           | 7.3  | 149.2              | 16.8  | 218.9              | 255.2  |
| 08SE46-02                                    | 913        | 28962                                  | 1.7  | 20.5577            | 2.1  | 0.1611             | 3.4  | 0.0240             | 2.7 | 0.78        | 153.0                           | 4.1  | 151.6              | 4.8   | 130.7              | 49.8   |
| 08SE46-03                                    | 521        | 12118                                  | 1.6  | 21.1743            | 7.7  | 0.1329             | 8.7  | 0.0204             | 4.1 | 0.47        | 130.3                           | 5.3  | 126.7              | 10.4  | 60.7               | 184.1  |
| 08SE46-04                                    | 273        | 10039                                  | 2.9  | 21.6953            | 9.2  | 0.1428             | 9.5  | 0.0225             | 2.4 | 0.25        | 143.3                           | 3.4  | 135.6              | 12.0  | 2.5                | 221.5  |
| 08SE46-05                                    | 304        | 9232                                   | 2.2  | 21.0099            | 8.0  | 0.1501             | 8.5  | 0.0229             | 2.7 | 0.32        | 145.8                           | 3.9  | 142.0              | 11.2  | 79.2               | 190.7  |
| 08SE46-06                                    | 492        | 23280                                  | 3.6  | 20.4454            | 5.8  | 0.1689             | 7.4  | 0.0250             | 4.6 | 0.62        | 159.4                           | 7.2  | 158.4              | 10.9  | 143.6              | 137.3  |
| 08SE46-07                                    | 358        | 8913                                   | 2.3  | 22.4983            | 8.1  | 0.1397             | 8.5  | 0.0228             | 2.6 | 0.31        | 145.3                           | 3.8  | 132.8              | 10.6  | -85.8              | 199.4  |
| 08SE46-08                                    | 383        | 14231                                  | 2.8  | 21.3560            | 9.0  | 0.1522             | 9.2  | 0.0236             | 1.9 | 0.20        | 150.2                           | 2.8  | 143.8              | 12.4  | 40.3               | 216.8  |
| 08SE46-09                                    | 117        | 2273                                   | 5.0  | 27.3892            | 40.0 | 0.0875             | 40.1 | 0.0174             | 3.3 | 0.08        | 111.1                           | 3.6  | 85.2               | 32.8  | -592.5             | 1121.8 |
| 08SE46-10                                    | 277        | 5889                                   | 3.2  | 22.4633            | 14.1 | 0.1278             | 14.2 | 0.0208             | 2.0 | 0.14        | 132.8                           | 2.6  | 122.1              | 16.4  | -82.0              | 346.7  |
| 08SE46-11                                    | 181        | 7662                                   | 5.7  | 20.5153            | 16.7 | 0.1407             | 17.1 | 0.0209             | 3.7 | 0.22        | 133.6                           | 4.9  | 133.7              | 21.4  | 135.6              | 394.1  |
| 08SE46-12                                    | 344        | 12886                                  | 4.7  | 20.7827            | 5.2  | 0.1399             | 5.6  | 0.0211             | 2.1 | 0.38        | 134.5                           | 2.8  | 133.0              | 7.0   | 105.0              | 122.1  |
| 08SE46-13                                    | 449        | 13492                                  | 5.3  | 20.5222            | 8.0  | 0.1484             | 8.4  | 0.0221             | 2.7 | 0.32        | 140.8                           | 3.7  | 140.5              | 11.0  | 134.7              | 187.5  |
| 08SE46-14                                    | 1120       | 33274                                  | 71.9 | 20.9767            | 5.5  | 0.1075             | 5.8  | 0.0163             | 1.8 | 0.31        | 104.5                           | 1.8  | 103.6              | 5.7   | 83.0               | 130.0  |
| 08SE46-15                                    | 319        | 9836                                   | 4.3  | 21.5082            | 12.0 | 0.1368             | 12.7 | 0.0213             | 4.2 | 0.33        | 136.1                           | 5.6  | 130.2              | 15.5  | 23.3               | 288.6  |
| 08SE46-16                                    | 656        | 24051                                  | 4.6  | 21.0751            | 4.9  | 0.1394             | 5.5  | 0.0213             | 2.4 | 0.44        | 135.9                           | 3.2  | 132.5              | 6.8   | 71.9               | 116.4  |
| 08SE46-17                                    | 551        | 23234                                  | 3.4  | 19.5260            | 5.9  | 0.1451             | 6.0  | 0.0205             | 1.1 | 0.18        | 131.1                           | 1.4  | 137.6              | 7.7   | 250.4              | 135.2  |
| 08SE46-18                                    | 352        | 13418                                  | 3.7  | 19.9698            | 10.2 | 0.1451             | 10.8 | 0.0210             | 3.5 | 0.33        | 134.1                           | 4.7  | 137.6              | 13.8  | 198.5              | 236.7  |
| 08SE46-20                                    | 350        | 13234                                  | 10.3 | 21.2977            | 8.7  | 0.1334             | 9.1  | 0.0206             | 2.4 | 0.27        | 131.5                           | 3.2  | 127.2              | 10.8  | 46.8               | 209.1  |
| 08SE46-21                                    | 500        | 19829                                  | 8.0  | 20.9730            | 6.1  | 0.1233             | 6.2  | 0.0188             | 1.0 | 0.15        | 119.8                           | 1.1  | 118.1              | 6.9   | 83.4               | 145.3  |
| 08SE46-22                                    | 301        | 9709                                   | 4.1  | 20.6188            | 10.2 | 0.1434             | 10.3 | 0.0214             | 1.7 | 0.17        | 136.8                           | 2.3  | 136.1              | 13.1  | 123.7              | 240.2  |
| 08SE46-23                                    | 357        | 7026                                   | 4.1  | 20.4494            | 6.2  | 0.1456             | 6.8  | 0.0216             | 2.8 | 0.41        | 137.7                           | 3.8  | 138.0              | 8.7   | 143.1              | 145.0  |
| 08SE46-24                                    | 373        | 13490                                  | 6.6  | 20.6791            | 11.6 | 0.1464             | 12.0 | 0.0220             | 3.0 | 0.25        | 140.0                           | 4.1  | 138.7              | 15.6  | 116.8              | 274.9  |
| 08SE46-25                                    | 352        | 14764                                  | 4.6  | 22.9303            | 8.4  | 0.1277             | 8.9  | 0.0212             | 2.8 | 0.32        | 135.5                           | 3.7  | 122.0              | 10.2  | -132.6             | 208.5  |
| 08SE46-26                                    | 282        | 9508                                   | 5.5  | 21.2653            | 12.7 | 0.1351             | 13.1 | 0.0208             | 3.1 | 0.24        | 132.9                           | 4.1  | 128.6              | 15.9  | 50.5               | 305.4  |
| 08SE46-27                                    | 994        | 30420                                  | 47.9 | 20.4952            | 2.6  | 0.1076             | 4.4  | 0.0160             | 3.6 | 0.82        | 102.3                           | 3.7  | 103.8              | 4.4   | 137.8              | 60.3   |
| 08SE46-28                                    | 307        | 16435                                  | 6.7  | 21.8456            | 17.9 | 0.1350             | 18.0 | 0.0214             | 2.6 | 0.14        | 136.5                           | 3.5  | 128.6              | 21.8  | -14.2              | 434.5  |
| 08SE46-29                                    | 428        | 22154                                  | 5.1  | 20.5983            | 9.9  | 0.1426             | 10.1 | 0.0213             | 1.7 | 0.17        | 135.9                           | 2.3  | 135.4              | 12.8  | 126.1              | 234.2  |
| 08SE46-30                                    | 458        | 19846                                  | 4.5  | 20.3831            | 7.2  | 0.1397             | 7.7  | 0.0207             | 2.7 | 0.36        | 131.8                           | 3.6  | 132.8              | 9.5   | 150.7              | 168.0  |
| 08SE46-31                                    | 183        | 5674                                   | 4.8  | 20.0201            | 14.2 | 0.1419             | 14.4 | 0.0206             | 2.3 | 0.16        | 131.4                           | 3.0  | 134.7              | 18.1  | 192.7              | 330.8  |
| 08SE46-32                                    | 611        | 12580                                  | 40.1 | 22.3028            | 14.1 | 0.0973             | 14.3 | 0.0157             | 2.5 | 0.17        | 100.7                           | 2.5  | 94.3               | 12.9  | -64.5              | 346.3  |
| 08SE46-33                                    | 244        | 4539                                   | 4.5  | 22.9651            | 21.5 | 0.1252             | 21.7 | 0.0209             | 2.8 | 0.13        | 133.1                           | 3.6  | 119.8              | 24.5  | -136.4             | 537.1  |
| 08SE46-34                                    | 1536       | 46267                                  | 99.7 | 20.5866            | 2.5  | 0.1095             | 3.7  | 0.0163             | 2.7 | 0.73        | 104.5                           | 2.8  | 105.5              | 3.7   | 127.4              | 59.5   |
| 08SE46-35                                    | 423        | 15662                                  | 3.4  | 21.5791            | 10.0 | 0.1399             | 10.2 | 0.0219             | 1.9 | 0.18        | 139.7                           | 2.6  | 133.0              | 12.7  | 15.4               | 241.2  |
| 08SE46-36                                    | 199        | 7019                                   | 9.2  | 22.7278            | 34.0 | 0.0982             | 34.3 | 0.0162             | 4.5 | 0.13        | 103.5                           | 4.6  | 95.1               | 31.1  | -110.7             | 858.3  |
| 08SE46-37                                    | 377        | 12501                                  | 4.2  | 22.2706            | 10.1 | 0.1275             | 10.3 | 0.0206             | 1.6 | 0.16        | 131.4                           | 2.1  | 121.9              | 11.8  | -60.9              | 247.8  |
| <i>Sample 08SE262 Antimony Peak tonalite</i> |            |                                        |      |                    |      |                    |      |                    |     |             |                                 |      |                    |       |                    |        |
| 265-1                                        | 320        | 8740                                   | 2.6  | 19.4672            | 7.1  | 0.1633             | 7.5  | 0.0231             | 2.4 | 0.32        | 146.9                           | 3.5  | 153.6              | 10.7  | 257.4              | 163.3  |
| 265-2                                        | 93         | 3780                                   | 4.0  | 22.5515            | 13.6 | 0.1394             | 13.9 | 0.0228             | 2.7 | 0.19        | 145.3                           | 3.9  | 132.5              | 17.3  | -91.6              | 335.8  |
| 265-3                                        | 70         | 1788                                   | 4.4  | 12.7913            | 55.8 | 0.2135             | 56.6 | 0.0198             | 9.5 | 0.17        | 126.5                           | 11.8 | 196.5              | 101.5 | 1151.4             | 1211.2 |
| 265-4                                        | 269        | 6612                                   | 3.0  | 20.3937            | 12.9 | 0.1431             | 13.1 | 0.0212             | 2.6 | 0.20        | 135.0                           | 3.5  | 135.8              | 16.7  | 149.5              | 302.4  |
| 265-5                                        | 359        | 8604                                   | 8.7  | 20.3347            | 8.8  | 0.1385             | 9.0  | 0.0204             | 2.0 | 0.22        | 130.3                           | 2.5  | 131.7              | 11.1  | 156.3              | 206.0  |
| 265-6                                        | 252        | 5524                                   | 2.4  | 18.3094            | 15.4 | 0.1578             | 15.4 | 0.0210             | 1.3 | 0.08        | 133.7                           | 1.7  | 148.8              | 21.4  | 396.5              | 346.5  |
| 265-9                                        | 139        | 3396                                   | 6.9  | 18.2264            | 22.5 | 0.1571             | 22.7 | 0.0208             | 2.8 | 0.12        | 132.5                           | 3.6  | 148.1              | 31.2  | 406.7              | 509.1  |
| 265-10                                       | 173        | 4000                                   | 3.1  | 21.9991            | 16.8 | 0.1328             | 16.9 | 0.0212             | 1.3 | 0.08        | 135.2                           | 1.7  | 126.6              | 20.1  | -31.1              | 410.0  |
| 265-11                                       | 279        | 6272                                   | 3.0  | 19.6795            | 8.0  | 0.1495             | 8.2  | 0.0213             | 1.8 | 0.22        | 136.1                           | 2.4  | 141.5              | 10.8  | 232.4              | 184.0  |
| 265-12                                       | 148        | 3504                                   | 4.0  | 21.5168            | 20.7 | 0.1422             | 21.0 | 0.0222             | 3.4 | 0.16        | 141.5                           | 4.8  | 135.0              | 26.6  | 22.3               | 502.1  |
| 265-13                                       | 138        | 3320                                   | 3.1  | 19.0678            | 15.5 | 0.1558             | 15.6 | 0.0215             | 1.7 | 0.11        | 137.4                           | 2.3  | 147.0              | 21.4  | 304.8              | 355.6  |
| 265-14                                       | 277        | 3120                                   | 3.0  | 19.6913            | 12.0 | 0.1412             | 12.3 | 0.0202             | 2.5 | 0.20        | 128.7                           | 3.2  | 134.1              | 15.4  | 231.0              | 278.6  |
| 265-16                                       | 61         | 1468                                   | 10.6 | 12.7433            | 54.6 | 0.2084             | 54.9 | 0.0193             | 5.5 | 0.10        | 123.0                           | 6.7  | 192.2              | 96.3  | 1158.8             | 1177.4 |
| 265-17                                       | 215        | 4884                                   | 3.7  | 19.4645            | 7.2  | 0.1565             | 7.7  | 0.0221             | 2.5 | 0.33        | 140.9                           | 3.5  | 147.6              | 10.5  | 257.7              | 166.5  |
| 265-18                                       | 146        | 4528                                   | 3.1  | 21.3312            | 17.3 | 0.1492             | 17.4 | 0.0231             | 1.4 | 0.08        | 147.1                           | 2.0  | 141.2              | 22.9  | 43.1               | 417.1  |
| 265-19                                       | 173        | 4476                                   | 2.4  | 21.1448            | 13.7 | 0.1373             | 13.9 | 0.0211             | 2.5 | 0.18        | 134.3                           | 3.3  | 130.7              | 17.0  | 64.0               | 326.4  |
| 265-20                                       | 280        | 6648                                   | 2.4  | 20.7088            | 7.3  | 0.1449             | 7.7  | 0.0218             | 2.6 | 0.34        | 138.8                           | 3.6  | 137.4              | 9.9   | 113.4              | 171.6  |

Table SD1 (Continued).

| Analysis       | U<br>(ppm) | <sup>206</sup> Pb<br><sup>204</sup> Pb | U/Th | Isotope ratios     |       |                    |       |                    |     |             | Isotopic ages (Ma) <sup>§</sup> |      |                    |       |                    |        |
|----------------|------------|----------------------------------------|------|--------------------|-------|--------------------|-------|--------------------|-----|-------------|---------------------------------|------|--------------------|-------|--------------------|--------|
|                |            |                                        |      | <sup>206</sup> Pb* | ±     | <sup>207</sup> Pb* | ±     | <sup>206</sup> Pb* | ±   | Error       | <sup>206</sup> Pb*              | ±    | <sup>207</sup> Pb* | ±     | <sup>206</sup> Pb* | ±      |
|                |            |                                        |      | <sup>207</sup> Pb* | (%)   | <sup>235</sup> U*  | (%)   | <sup>238</sup> U   | (%) | correlation | <sup>238</sup> U                | (Ma) | <sup>235</sup> U*  | (Ma)  | <sup>207</sup> Pb* | (Ma)   |
| 265-21         | 101        | 3868                                   | 5.4  | 25.6979            | 105.4 | 0.1176             | 105.4 | 0.0219             | 2.8 | 0.03        | 139.8                           | 3.9  | 112.9              | 113.1 | -422.6             | 1440.5 |
| 265-22         | 129        | 4576                                   | 3.7  | 23.5078            | 39.1  | 0.1323             | 39.1  | 0.0226             | 2.0 | 0.05        | 143.8                           | 2.8  | 126.1              | 46.4  | -194.5             | 1011.7 |
| 265-23         | 204        | 4312                                   | 3.3  | 22.0076            | 9.2   | 0.1296             | 9.8   | 0.0207             | 3.2 | 0.32        | 132.0                           | 4.1  | 123.7              | 11.4  | -32.1              | 224.6  |
| 265-24         | 150        | 5032                                   | 3.2  | 22.2718            | 16.7  | 0.1378             | 16.8  | 0.0223             | 1.7 | 0.10        | 141.9                           | 2.4  | 131.1              | 20.7  | -61.1              | 410.6  |
| 265-25         | 99         | 728                                    | 4.7  | 11.0307            | 23.2  | 0.2765             | 23.3  | 0.0221             | 1.7 | 0.07        | 141.1                           | 2.3  | 247.9              | 51.2  | 1439.4             | 448.3  |
| 265-26         | 131        | 4608                                   | 3.6  | 17.4608            | 9.1   | 0.1764             | 9.2   | 0.0223             | 1.1 | 0.12        | 142.4                           | 1.5  | 165.0              | 14.0  | 502.0              | 200.7  |
| 265-27         | 116        | 2400                                   | 3.4  | 18.2013            | 32.9  | 0.1598             | 33.1  | 0.0211             | 3.4 | 0.10        | 134.6                           | 4.5  | 150.6              | 46.4  | 409.8              | 755.3  |
| 265-28         | 320        | 3452                                   | 10.1 | 19.5443            | 7.7   | 0.1469             | 7.8   | 0.0208             | 1.5 | 0.20        | 132.9                           | 2.0  | 139.2              | 10.2  | 248.3              | 176.6  |
| 265-29         | 141        | 4028                                   | 4.4  | 22.8028            | 22.9  | 0.1386             | 23.0  | 0.0229             | 2.4 | 0.10        | 146.1                           | 3.4  | 131.8              | 28.4  | -118.8             | 570.6  |
| 265-30         | 120        | 3680                                   | 3.8  | 21.1243            | 14.5  | 0.1521             | 14.6  | 0.0233             | 0.7 | 0.05        | 148.5                           | 1.1  | 143.7              | 19.5  | 66.3               | 347.6  |
| 265-31         | 204        | 4976                                   | 3.6  | 21.0582            | 12.0  | 0.1491             | 12.6  | 0.0228             | 3.6 | 0.29        | 145.1                           | 5.2  | 141.1              | 16.5  | 73.8               | 286.8  |
| 265-33         | 286        | 4040                                   | 3.0  | 17.5321            | 21.2  | 0.1757             | 21.2  | 0.0223             | 1.0 | 0.05        | 142.4                           | 1.4  | 164.3              | 32.2  | 493.0              | 472.3  |
| 265-34         | 187        | 2564                                   | 4.1  | 21.4039            | 8.9   | 0.1319             | 9.0   | 0.0205             | 1.2 | 0.14        | 130.7                           | 1.6  | 125.8              | 10.7  | 34.9               | 214.3  |
| 265-35         | 170        | 3108                                   | 4.3  | 19.8121            | 15.2  | 0.1488             | 15.3  | 0.0214             | 0.9 | 0.06        | 136.4                           | 1.2  | 140.9              | 20.1  | 216.9              | 354.7  |
| 265-36         | 187        | 3736                                   | 3.8  | 22.5558            | 12.4  | 0.1313             | 12.6  | 0.0215             | 2.1 | 0.16        | 137.0                           | 2.8  | 125.3              | 14.8  | -92.1              | 305.3  |
| 945-1          | 142        | 4416                                   | 3.0  | 21.8668            | 6.1   | 0.1388             | 6.3   | 0.0220             | 1.4 | 0.22        | 140.4                           | 1.9  | 132.0              | 7.7   | -16.5              | 147.4  |
| 945-2          | 98         | 2898                                   | 4.5  | 22.3352            | 10.1  | 0.1344             | 10.4  | 0.0218             | 2.4 | 0.23        | 138.8                           | 3.3  | 128.0              | 12.5  | -68.0              | 247.3  |
| 945-6-3        | 108        | 4102                                   | 4.0  | 22.2551            | 8.2   | 0.1345             | 8.3   | 0.0217             | 1.6 | 0.19        | 138.4                           | 2.2  | 128.1              | 10.0  | -59.2              | 199.0  |
| 945-6-4        | 95         | 3199                                   | 4.2  | 22.1618            | 9.2   | 0.1357             | 9.3   | 0.0218             | 1.4 | 0.16        | 139.1                           | 2.0  | 129.2              | 11.3  | -49.0              | 223.4  |
| 945-6-5        | 105        | 2936                                   | 3.8  | 24.2696            | 10.5  | 0.1210             | 10.6  | 0.0213             | 0.8 | 0.07        | 135.9                           | 1.0  | 116.0              | 11.6  | -274.9             | 268.2  |
| 945-6-6        | 114        | 1911                                   | 3.7  | 24.4925            | 11.9  | 0.1201             | 12.0  | 0.0213             | 0.7 | 0.06        | 136.1                           | 0.9  | 115.2              | 13.0  | -298.3             | 306.1  |
| 945-6-7        | 101        | 1094                                   | 4.1  | 27.5359            | 13.4  | 0.1043             | 13.5  | 0.0208             | 1.1 | 0.08        | 132.9                           | 1.4  | 100.7              | 12.9  | -607.0             | 367.0  |
| 945-6-8        | 80         | 1756                                   | 4.7  | 25.9671            | 15.2  | 0.1112             | 15.3  | 0.0209             | 1.6 | 0.10        | 133.6                           | 2.1  | 107.0              | 15.6  | -449.9             | 403.5  |
| 945-6-9        | 112        | 4457                                   | 4.1  | 23.0002            | 6.1   | 0.1248             | 6.4   | 0.0208             | 2.0 | 0.31        | 132.8                           | 2.6  | 119.4              | 7.2   | -140.1             | 151.1  |
| 945-6-10       | 114        | 3746                                   | 3.3  | 23.0062            | 9.6   | 0.1234             | 9.8   | 0.0206             | 2.1 | 0.21        | 131.4                           | 2.7  | 118.2              | 11.0  | -140.8             | 238.3  |
| 945-6-11       | 95         | 2680                                   | 5.0  | 21.6939            | 11.2  | 0.1349             | 11.3  | 0.0212             | 1.8 | 0.16        | 135.4                           | 2.4  | 128.5              | 13.7  | 2.6                | 269.9  |
| 945-6-12       | 262        | 6192                                   | 2.6  | 21.4036            | 4.2   | 0.1373             | 4.8   | 0.0213             | 2.2 | 0.47        | 135.9                           | 3.0  | 130.6              | 5.8   | 35.0               | 100.6  |
| 945-6-13       | 141        | 3792                                   | 3.9  | 23.7315            | 10.0  | 0.1202             | 10.0  | 0.0207             | 1.2 | 0.12        | 132.0                           | 1.6  | 115.2              | 10.9  | -218.2             | 250.9  |
| 945-6-14       | 212        | 3756                                   | 3.3  | 22.9093            | 4.7   | 0.1270             | 4.9   | 0.0211             | 1.4 | 0.28        | 134.6                           | 1.8  | 121.4              | 5.6   | -130.3             | 116.7  |
| 945-6-15       | 121        | 3574                                   | 3.7  | 24.9505            | 11.4  | 0.1168             | 11.5  | 0.0211             | 1.5 | 0.13        | 134.9                           | 2.0  | 112.2              | 12.2  | -345.8             | 293.8  |
| 945-6-16       | 99         | 1964                                   | 4.4  | 24.3594            | 15.4  | 0.1167             | 15.7  | 0.0206             | 3.2 | 0.20        | 131.5                           | 4.1  | 112.1              | 16.6  | -284.4             | 393.1  |
| 945-6-17       | 126        | 2041                                   | 4.2  | 25.4403            | 9.0   | 0.1139             | 9.2   | 0.0210             | 2.0 | 0.22        | 134.1                           | 2.7  | 109.5              | 9.5   | -396.2             | 233.9  |
| 945-6-18       | 93         | 1428                                   | 4.7  | 29.4792            | 14.4  | 0.0976             | 14.4  | 0.0209             | 1.3 | 0.09        | 133.1                           | 1.7  | 94.6               | 13.0  | -796.5             | 408.9  |
| 945-6-19       | 171        | 1993                                   | 3.1  | 23.9143            | 5.8   | 0.1216             | 6.0   | 0.0211             | 1.3 | 0.21        | 134.5                           | 1.7  | 116.5              | 6.6   | -237.6             | 147.4  |
| 945-6-20       | 192        | 3509                                   | 3.2  | 23.4958            | 8.1   | 0.1292             | 8.2   | 0.0220             | 1.3 | 0.15        | 140.4                           | 1.8  | 123.4              | 9.5   | -193.2             | 202.7  |
| 945-6-21       | 109        | 2385                                   | 4.3  | 22.4279            | 10.1  | 0.1330             | 10.3  | 0.0216             | 2.3 | 0.22        | 137.9                           | 3.2  | 126.8              | 12.3  | -78.1              | 247.1  |
| 945-6-22       | 125        | 3481                                   | 4.3  | 21.9445            | 9.2   | 0.1357             | 9.3   | 0.0216             | 1.5 | 0.16        | 137.7                           | 2.0  | 129.2              | 11.3  | -25.1              | 222.6  |
| 945-6-23       | 169        | 4973                                   | 4.4  | 20.9214            | 12.9  | 0.1405             | 13.0  | 0.0213             | 1.8 | 0.14        | 136.0                           | 2.5  | 133.5              | 16.3  | 89.3               | 305.9  |
| 945-6-24       | 72         | 2666                                   | 5.9  | 26.3305            | 31.5  | 0.1131             | 31.7  | 0.0216             | 3.7 | 0.12        | 137.8                           | 5.1  | 108.8              | 32.7  | -486.7             | 853.9  |
| 945-6-25       | 131        | 3989                                   | 4.4  | 22.9039            | 7.6   | 0.1297             | 7.7   | 0.0215             | 1.4 | 0.18        | 137.4                           | 1.9  | 123.8              | 9.0   | -129.8             | 188.1  |
| 945-6-26       | 385        | 16642                                  | 2.6  | 21.0138            | 2.0   | 0.1425             | 2.7   | 0.0217             | 1.8 | 0.66        | 138.5                           | 2.4  | 135.2              | 3.4   | 78.8               | 48.1   |
| 945-6-27       | 147        | 3223                                   | 4.1  | 22.0650            | 6.0   | 0.1338             | 6.1   | 0.0214             | 1.3 | 0.21        | 136.6                           | 1.7  | 127.5              | 7.3   | -38.4              | 144.8  |
| 945-6-28       | 122        | 4824                                   | 4.7  | 22.9727            | 7.2   | 0.1302             | 7.5   | 0.0217             | 2.0 | 0.26        | 138.3                           | 2.7  | 124.3              | 8.7   | -137.2             | 178.4  |
| 945-6-29       | 156        | 7030                                   | 4.1  | 22.2611            | 9.9   | 0.1347             | 10.0  | 0.0218             | 1.3 | 0.13        | 138.7                           | 1.7  | 128.3              | 12.1  | -59.9              | 242.4  |
| 945-6-30       | 146        | 3169                                   | 4.3  | 23.5175            | 9.5   | 0.1247             | 9.6   | 0.0213             | 1.1 | 0.11        | 135.7                           | 1.4  | 119.3              | 10.8  | -195.5             | 238.7  |
| 945-6-32       | 179        | 938                                    | 4.2  | 28.3856            | 17.7  | 0.1034             | 17.9  | 0.0213             | 2.7 | 0.15        | 135.8                           | 3.6  | 100.0              | 17.0  | -690.5             | 493.8  |
| 945-6-33       | 195        | 5503                                   | 3.0  | 20.4561            | 5.6   | 0.1436             | 6.1   | 0.0213             | 2.5 | 0.41        | 135.9                           | 3.3  | 136.2              | 7.8   | 142.3              | 131.1  |
| 945-6-33       | 195        | 4013                                   | 3.0  | 21.8269            | 4.3   | 0.1328             | 4.7   | 0.0210             | 1.8 | 0.38        | 134.1                           | 2.4  | 126.6              | 5.6   | -12.1              | 104.6  |
| 945-6-35       | 98         | 3077                                   | 4.8  | 21.6829            | 17.1  | 0.1341             | 17.3  | 0.0211             | 2.9 | 0.17        | 134.5                           | 3.8  | 127.8              | 20.8  | 3.8                | 413.6  |
| Sample 08SE451 |            | Antimony Peak tonalite                 |      |                    |       |                    |       |                    |     |             |                                 |      |                    |       |                    |        |
| 08SE451-1      | 287        | 4224                                   | 4.5  | 23.9326            | 12.7  | 0.1224             | 12.8  | 0.0212             | 1.3 | 0.10        | 135.5                           | 1.8  | 117.3              | 14.2  | -239.5             | 322.1  |
| 08SE451-2      | 491        | 6710                                   | 3.6  | 21.1605            | 11.0  | 0.1341             | 11.3  | 0.0206             | 2.3 | 0.21        | 131.3                           | 3.0  | 127.8              | 13.5  | 62.3               | 263.5  |
| 08SE451-3      | 517        | 9843                                   | 3.6  | 21.1900            | 7.6   | 0.1411             | 7.8   | 0.0217             | 1.7 | 0.21        | 138.3                           | 2.3  | 134.0              | 9.7   | 59.0               | 181.0  |
| 08SE451-4      | 349        | 5360                                   | 3.8  | 20.3378            | 10.5  | 0.1450             | 10.6  | 0.0214             | 1.3 | 0.12        | 136.4                           | 1.7  | 137.5              | 13.6  | 155.9              | 246.6  |
| 08SE451-5      | 635        | 10713                                  | 3.2  | 20.7972            | 5.1   | 0.1414             | 6.0   | 0.0213             | 3.1 | 0.52        | 136.0                           | 4.2  | 134.3              | 7.5   | 103.4              | 120.8  |
| 08SE451-6      | 272        | 4433                                   | 4.0  | 20.9007            | 16.6  | 0.1419             | 16.7  | 0.0215             | 1.8 | 0.11        | 137.2                           | 2.4  | 134.8              | 21.1  | 91.7               | 395.3  |
| 08SE451-7      | 158        | 2358                                   | 5.5  | 26.7413            | 34.4  | 0.1134             | 34.4  | 0.0220             | 2.1 | 0.06        | 140.3                           | 2.9  | 109.1              | 35.6  | -528.0             | 942.9  |

Table SD1 (Continued).

| Analysis                                     | U<br>(ppm) | <sup>206</sup> Pb<br><sup>204</sup> Pb | U/Th | Isotope ratios     |      |                    |      |                    |     |             | Isotopic ages (Ma) <sup>§</sup> |      |                    |      |                    |       |
|----------------------------------------------|------------|----------------------------------------|------|--------------------|------|--------------------|------|--------------------|-----|-------------|---------------------------------|------|--------------------|------|--------------------|-------|
|                                              |            |                                        |      | <sup>206</sup> Pb* | ±    | <sup>207</sup> Pb* | ±    | <sup>206</sup> Pb* | ±   | Error       | <sup>206</sup> Pb*              | ±    | <sup>207</sup> Pb* | ±    | <sup>206</sup> Pb* | ±     |
|                                              |            |                                        |      | <sup>207</sup> Pb* | (%)  | <sup>235</sup> U*  | (%)  | <sup>238</sup> U   | (%) | correlation | <sup>238</sup> U                | (Ma) | <sup>235</sup> U*  | (Ma) | <sup>207</sup> Pb* | (Ma)  |
| 08SE451-8                                    | 388        | 8042                                   | 3.4  | 22.6383            | 8.3  | 0.1458             | 8.4  | 0.0239             | 1.6 | 0.19        | 152.5                           | 2.4  | 138.2              | 10.9 | -101.0             | 204.2 |
| 08SE451-9                                    | 317        | 7880                                   | 4.0  | 21.6431            | 11.8 | 0.1409             | 12.0 | 0.0221             | 1.7 | 0.14        | 141.0                           | 2.4  | 133.8              | 15.0 | 8.3                | 285.5 |
| 08SE451-10                                   | 338        | 5326                                   | 4.6  | 22.2482            | 14.7 | 0.1341             | 15.0 | 0.0216             | 3.4 | 0.22        | 138.0                           | 4.6  | 127.8              | 18.1 | -58.5              | 358.7 |
| 08SE451-11                                   | 321        | 5057                                   | 2.9  | 19.6284            | 6.8  | 0.1566             | 8.1  | 0.0223             | 4.3 | 0.54        | 142.1                           | 6.1  | 147.7              | 11.1 | 238.4              | 156.6 |
| 08SE451-12                                   | 591        | 7680                                   | 7.0  | 19.8833            | 6.4  | 0.1469             | 6.4  | 0.0212             | 0.8 | 0.13        | 135.2                           | 1.1  | 139.2              | 8.3  | 208.6              | 147.5 |
| 08SE451-13                                   | 474        | 8343                                   | 3.3  | 21.5265            | 12.5 | 0.1353             | 12.6 | 0.0211             | 1.7 | 0.14        | 134.7                           | 2.3  | 128.8              | 15.2 | 21.3               | 300.5 |
| 08SE451-14                                   | 277        | 3592                                   | 3.8  | 21.1706            | 19.8 | 0.1313             | 20.0 | 0.0202             | 2.3 | 0.11        | 128.6                           | 2.9  | 125.2              | 23.5 | 61.2               | 476.9 |
| 08SE451-15                                   | 692        | 11763                                  | 3.1  | 21.1520            | 8.4  | 0.1358             | 8.6  | 0.0208             | 1.5 | 0.18        | 132.9                           | 2.0  | 129.3              | 10.4 | 63.2               | 201.0 |
| 08SE451-16                                   | 350        | 5724                                   | 2.5  | 21.1318            | 15.6 | 0.1350             | 15.7 | 0.0207             | 2.0 | 0.13        | 132.0                           | 2.7  | 128.6              | 19.0 | 65.5               | 373.3 |
| 08SE451-17                                   | 217        | 6670                                   | 4.3  | 25.0428            | 8.8  | 0.1200             | 9.4  | 0.0218             | 3.1 | 0.34        | 139.0                           | 4.3  | 115.1              | 10.2 | -355.4             | 228.7 |
| 08SE451-18                                   | 275        | 4753                                   | 3.1  | 21.0576            | 20.5 | 0.1337             | 20.7 | 0.0204             | 2.2 | 0.11        | 130.3                           | 2.9  | 127.4              | 24.7 | 73.9               | 492.7 |
| 08SE451-19                                   | 466        | 8829                                   | 2.6  | 21.5786            | 7.0  | 0.1349             | 7.7  | 0.0211             | 3.3 | 0.43        | 134.7                           | 4.4  | 128.5              | 9.3  | 15.4               | 168.2 |
| 08SE451-20                                   | 697        | 12155                                  | 2.4  | 20.5625            | 8.1  | 0.1452             | 8.3  | 0.0217             | 2.0 | 0.24        | 138.1                           | 2.7  | 137.7              | 10.7 | 130.2              | 189.7 |
| 08SE451-21                                   | 258        | 4439                                   | 4.3  | 22.9916            | 7.6  | 0.1299             | 8.4  | 0.0217             | 3.6 | 0.43        | 138.1                           | 4.9  | 124.0              | 9.8  | -139.2             | 189.2 |
| 08SE451-22                                   | 316        | 6211                                   | 3.2  | 21.9086            | 13.1 | 0.1395             | 13.3 | 0.0222             | 2.2 | 0.17        | 141.3                           | 3.1  | 132.6              | 16.5 | -21.1              | 318.5 |
| 08SE451-23                                   | 338        | 5325                                   | 3.6  | 23.0531            | 10.8 | 0.1217             | 11.6 | 0.0204             | 4.2 | 0.36        | 129.9                           | 5.4  | 116.6              | 12.7 | -145.8             | 268.2 |
| 08SE451-24                                   | 507        | 11095                                  | 2.6  | 21.8755            | 12.6 | 0.1331             | 12.8 | 0.0211             | 2.3 | 0.18        | 134.7                           | 3.1  | 126.9              | 15.2 | -17.5              | 304.6 |
| 08SE451-25                                   | 474        | 6309                                   | 2.9  | 21.5480            | 12.4 | 0.1348             | 12.5 | 0.0211             | 1.5 | 0.12        | 134.4                           | 2.0  | 128.4              | 15.1 | 18.9               | 299.3 |
| 08SE451-26                                   | 604        | 10879                                  | 3.1  | 22.0907            | 7.1  | 0.1328             | 7.5  | 0.0213             | 2.4 | 0.32        | 135.7                           | 3.2  | 126.6              | 8.9  | -41.2              | 173.0 |
| 08SE451-26                                   | 724        | 12925                                  | 2.5  | 20.8522            | 6.6  | 0.1384             | 7.1  | 0.0209             | 2.6 | 0.37        | 133.5                           | 3.5  | 131.6              | 8.8  | 97.1               | 155.9 |
| 08SE451-27                                   | 257        | 7397                                   | 3.5  | 22.2740            | 26.9 | 0.1320             | 27.0 | 0.0213             | 2.3 | 0.09        | 136.0                           | 3.1  | 125.9              | 32.0 | -61.3              | 666.3 |
| 08SE451-28                                   | 431        | 7986                                   | 3.9  | 21.6136            | 14.5 | 0.1266             | 14.5 | 0.0198             | 1.4 | 0.09        | 126.6                           | 1.7  | 121.0              | 16.6 | 11.5               | 349.5 |
| 08SE451-28                                   | 498        | 11486                                  | 3.7  | 23.1188            | 8.5  | 0.1277             | 8.6  | 0.0214             | 1.6 | 0.19        | 136.6                           | 2.2  | 122.0              | 9.9  | -152.9             | 210.4 |
| 08SE451-29                                   | 261        | 6519                                   | 4.5  | 21.8373            | 17.0 | 0.1365             | 17.1 | 0.0216             | 1.6 | 0.10        | 137.8                           | 2.2  | 129.9              | 20.8 | -13.2              | 412.8 |
| 08SE451-30                                   | 575        | 9383                                   | 3.3  | 21.5012            | 6.6  | 0.1334             | 6.9  | 0.0208             | 2.0 | 0.29        | 132.7                           | 2.6  | 127.1              | 8.3  | 24.1               | 159.7 |
| 08SE451-31                                   | 433        | 8825                                   | 2.6  | 21.6586            | 15.6 | 0.1373             | 15.7 | 0.0216             | 1.4 | 0.09        | 137.5                           | 2.0  | 130.6              | 19.2 | 6.6                | 377.9 |
| 08SE451-32                                   | 1484       | 1327                                   | 0.9  | 19.4461            | 14.6 | 0.0982             | 14.7 | 0.0139             | 1.8 | 0.12        | 88.7                            | 1.6  | 95.1               | 13.3 | 259.9              | 335.9 |
| 08SE451-33                                   | 675        | 14417                                  | 2.8  | 21.5193            | 3.6  | 0.1415             | 4.1  | 0.0221             | 1.9 | 0.47        | 140.8                           | 2.7  | 134.4              | 5.2  | 22.1               | 86.8  |
| 08SE451-34                                   | 596        | 12003                                  | 2.3  | 21.2439            | 9.8  | 0.1398             | 10.3 | 0.0215             | 3.0 | 0.29        | 137.3                           | 4.1  | 132.8              | 12.8 | 52.9               | 235.5 |
| 08SE451-35                                   | 634        | 10568                                  | 4.2  | 21.3705            | 6.8  | 0.1371             | 7.0  | 0.0212             | 1.5 | 0.22        | 135.5                           | 2.0  | 130.5              | 8.5  | 38.7               | 163.3 |
| <i>Sample 08SE582 Antimony Peak tonalite</i> |            |                                        |      |                    |      |                    |      |                    |     |             |                                 |      |                    |      |                    |       |
| 09SE23-1                                     | 477        | 5858                                   | 3.4  | 20.6384            | 11.0 | 0.1375             | 11.1 | 0.0206             | 1.1 | 0.10        | 131.3                           | 1.5  | 130.8              | 13.6 | 121.5              | 260.1 |
| 09SE23-2                                     | 284        | 4831                                   | 4.5  | 29.2471            | 25.1 | 0.0995             | 25.3 | 0.0211             | 2.9 | 0.11        | 134.7                           | 3.8  | 96.3               | 23.2 | -774.1             | 717.7 |
| 09SE23-3                                     | 239        | 3389                                   | 4.3  | 23.2084            | 18.6 | 0.1216             | 19.0 | 0.0205             | 3.9 | 0.21        | 130.6                           | 5.1  | 116.5              | 20.9 | -162.5             | 466.3 |
| 09SE23-4                                     | 613        | 11961                                  | 3.9  | 21.2813            | 6.9  | 0.1357             | 7.0  | 0.0209             | 1.3 | 0.19        | 133.6                           | 1.7  | 129.2              | 8.6  | 48.7               | 165.5 |
| 09SE23-5                                     | 236        | 1761                                   | 3.8  | 19.5127            | 19.8 | 0.1511             | 20.1 | 0.0214             | 3.5 | 0.18        | 136.4                           | 4.8  | 142.9              | 26.8 | 252.0              | 458.8 |
| 09SE23-6                                     | 368        | 4937                                   | 3.9  | 21.7185            | 6.6  | 0.1342             | 7.1  | 0.0211             | 2.6 | 0.37        | 134.8                           | 3.5  | 127.8              | 8.5  | -0.1               | 158.9 |
| 09SE23-7                                     | 355        | 4614                                   | 2.8  | 22.4992            | 9.6  | 0.1312             | 10.1 | 0.0214             | 3.3 | 0.32        | 136.6                           | 4.4  | 125.2              | 11.9 | -85.9              | 234.9 |
| 09SE23-8                                     | 422        | 6222                                   | 3.8  | 20.4645            | 6.8  | 0.1463             | 7.2  | 0.0217             | 2.4 | 0.34        | 138.5                           | 3.3  | 138.6              | 9.4  | 141.4              | 159.9 |
| 09SE23-9                                     | 412        | 5835                                   | 4.2  | 20.9166            | 10.9 | 0.1429             | 11.1 | 0.0217             | 2.1 | 0.19        | 138.3                           | 2.9  | 135.7              | 14.1 | 89.8               | 259.2 |
| 09SE23-11                                    | 512        | 7044                                   | 3.6  | 20.9289            | 6.8  | 0.1380             | 7.0  | 0.0209             | 1.9 | 0.27        | 133.6                           | 2.5  | 131.3              | 8.7  | 88.5               | 160.7 |
| 09SE23-12                                    | 290        | 6783                                   | 3.7  | 20.6244            | 10.8 | 0.1421             | 10.8 | 0.0213             | 1.1 | 0.10        | 135.6                           | 1.4  | 134.9              | 13.7 | 123.0              | 254.3 |
| 09SE23-13                                    | 393        | 5378                                   | 4.2  | 20.7321            | 9.5  | 0.1397             | 9.7  | 0.0210             | 2.2 | 0.22        | 134.0                           | 2.9  | 132.8              | 12.1 | 110.8              | 224.0 |
| 09SE23-14                                    | 1009       | 15045                                  | 3.0  | 20.3668            | 3.0  | 0.1371             | 6.3  | 0.0203             | 5.5 | 0.88        | 129.3                           | 7.1  | 130.5              | 7.7  | 152.6              | 70.9  |
| 09SE23-15                                    | 538        | 8836                                   | 2.8  | 20.5878            | 6.4  | 0.1425             | 6.6  | 0.0213             | 1.4 | 0.21        | 135.8                           | 1.8  | 135.3              | 8.3  | 127.3              | 151.0 |
| 09SE23-16                                    | 406        | 8124                                   | 2.6  | 21.8724            | 6.0  | 0.1343             | 7.6  | 0.0213             | 4.7 | 0.61        | 135.9                           | 6.3  | 127.9              | 9.1  | -17.1              | 145.4 |
| 09SE23-17                                    | 246        | 3083                                   | 3.4  | 23.2999            | 8.2  | 0.1275             | 8.8  | 0.0216             | 3.0 | 0.34        | 137.5                           | 4.1  | 121.9              | 10.1 | -172.3             | 205.6 |
| 09SE23-18                                    | 539        | 8803                                   | 2.6  | 21.0838            | 10.0 | 0.1405             | 10.4 | 0.0215             | 2.7 | 0.26        | 137.0                           | 3.7  | 133.5              | 13.0 | 70.9               | 239.5 |
| 09SE23-20                                    | 699        | 10022                                  | 3.3  | 21.4368            | 6.3  | 0.1431             | 6.7  | 0.0223             | 2.3 | 0.34        | 141.9                           | 3.2  | 135.8              | 8.6  | 31.3               | 151.9 |
| 09SE23-21                                    | 299        | 7164                                   | 3.8  | 26.4298            | 33.7 | 0.1088             | 33.7 | 0.0209             | 1.4 | 0.04        | 133.1                           | 1.9  | 104.9              | 33.6 | -496.7             | 917.8 |
| 09SE23-22                                    | 678        | 11932                                  | 4.1  | 21.4311            | 4.8  | 0.1342             | 5.5  | 0.0209             | 2.7 | 0.49        | 133.1                           | 3.6  | 127.9              | 6.6  | 31.9               | 114.9 |
| 09SE23-23                                    | 377        | 7262                                   | 4.2  | 21.3651            | 11.2 | 0.1383             | 11.5 | 0.0214             | 2.8 | 0.24        | 136.7                           | 3.8  | 131.5              | 14.2 | 39.3               | 268.2 |
| 09SE23-24                                    | 342        | 6015                                   | 4.1  | 20.1156            | 11.6 | 0.1428             | 11.7 | 0.0208             | 1.0 | 0.09        | 132.9                           | 1.3  | 135.6              | 14.8 | 181.6              | 271.2 |
| 09SE23-25                                    | 449        | 5297                                   | 4.2  | 20.8881            | 10.2 | 0.1413             | 10.4 | 0.0214             | 2.2 | 0.21        | 136.6                           | 2.9  | 134.2              | 13.1 | 93.0               | 241.7 |
| 09SE23-26                                    | 323        | 4731                                   | 3.3  | 22.1631            | 8.8  | 0.1266             | 9.3  | 0.0203             | 3.1 | 0.33        | 129.8                           | 4.0  | 121.0              | 10.7 | -49.2              | 214.9 |
| 09SE23-27                                    | 303        | 5829                                   | 3.5  | 20.8509            | 10.8 | 0.1421             | 11.2 | 0.0215             | 2.7 | 0.24        | 137.1                           | 3.6  | 134.9              | 14.1 | 97.3               | 256.9 |
| 09SE23-28                                    | 432        | 6643                                   | 3.1  | 21.3463            | 6.1  | 0.1357             | 6.4  | 0.0210             | 1.8 | 0.28        | 134.0                           | 2.3  | 129.2              | 7.7  | 41.4               | 146.3 |

Table SD1 (Continued).

| Analysis                                     | U<br>(ppm) | <sup>206</sup> Pb<br><sup>204</sup> Pb | U/Th  | Isotope ratios     |      |                    |      |                    |      |             | Isotopic ages (Ma) <sup>§</sup> |      |                    |      |                    |       |
|----------------------------------------------|------------|----------------------------------------|-------|--------------------|------|--------------------|------|--------------------|------|-------------|---------------------------------|------|--------------------|------|--------------------|-------|
|                                              |            |                                        |       | <sup>206</sup> Pb* | ±    | <sup>207</sup> Pb* | ±    | <sup>206</sup> Pb* | ±    | Error       | <sup>206</sup> Pb*              | ±    | <sup>207</sup> Pb* | ±    | <sup>206</sup> Pb* | ±     |
|                                              |            |                                        |       | <sup>207</sup> Pb* | (%)  | <sup>235</sup> U*  | (%)  | <sup>238</sup> U   | (%)  | correlation | <sup>238</sup> U                | (Ma) | <sup>235</sup> U*  | (Ma) | <sup>207</sup> Pb* | (Ma)  |
| 09SE23-29                                    | 759        | 13683                                  | 3.2   | 20.7479            | 5.0  | 0.1424             | 5.3  | 0.0214             | 1.6  | 0.30        | 136.7                           | 2.2  | 135.2              | 6.7  | 109.0              | 118.2 |
| 09SE23-30                                    | 229        | 3095                                   | 5.0   | 23.9894            | 19.8 | 0.1138             | 22.9 | 0.0198             | 11.7 | 0.51        | 126.4                           | 14.6 | 109.4              | 23.8 | -245.5             | 503.7 |
| <i>Sample 08SE675 Antimony Peak tonalite</i> |            |                                        |       |                    |      |                    |      |                    |      |             |                                 |      |                    |      |                    |       |
| 08SE675-2                                    | 310        | 7046                                   | 4.1   | 20.7890            | 17.0 | 0.1381             | 18.7 | 0.0208             | 7.8  | 0.42        | 132.9                           | 10.3 | 131.4              | 23.1 | 104.3              | 405.1 |
| 08SE675-4                                    | 533        | 3185                                   | 3.0   | 23.4689            | 14.8 | 0.0902             | 14.9 | 0.0153             | 1.8  | 0.12        | 98.2                            | 1.7  | 87.7               | 12.5 | -190.3             | 371.5 |
| 08SE675-5                                    | 1051       | 13002                                  | 21.4  | 21.2341            | 5.5  | 0.1002             | 6.4  | 0.0154             | 3.4  | 0.53        | 98.7                            | 3.3  | 97.0               | 5.9  | 54.0               | 130.3 |
| 08SE675-7                                    | 673        | 16159                                  | 4.5   | 21.1073            | 8.5  | 0.1296             | 10.6 | 0.0198             | 6.3  | 0.60        | 126.6                           | 7.9  | 123.7              | 12.3 | 68.3               | 202.5 |
| 08SE675-8                                    | 402        | 6837                                   | 2.4   | 19.2682            | 14.7 | 0.1463             | 15.3 | 0.0204             | 4.3  | 0.28        | 130.4                           | 5.6  | 138.6              | 19.9 | 281.0              | 338.3 |
| 08SE675-10                                   | 381        | 4385                                   | 2.4   | 22.1222            | 8.7  | 0.1306             | 9.1  | 0.0209             | 2.6  | 0.29        | 133.6                           | 3.4  | 124.6              | 10.7 | -44.7              | 212.1 |
| 08SE675-11                                   | 368        | 8037                                   | 3.0   | 23.8635            | 19.9 | 0.1174             | 20.6 | 0.0203             | 5.5  | 0.27        | 129.6                           | 7.1  | 112.7              | 22.0 | -232.2             | 504.9 |
| 08SE675-12                                   | 312        | 5277                                   | 9.3   | 23.1084            | 30.7 | 0.1016             | 31.5 | 0.0170             | 7.2  | 0.23        | 108.8                           | 7.8  | 98.2               | 29.5 | -151.8             | 777.6 |
| 08SE675-13                                   | 1650       | 35821                                  | 3.4   | 20.2107            | 2.3  | 0.1514             | 4.2  | 0.0222             | 3.5  | 0.83        | 141.5                           | 4.8  | 143.2              | 5.6  | 170.6              | 54.0  |
| 08SE675-14                                   | 749        | 15762                                  | 5.1   | 21.6960            | 10.9 | 0.1349             | 11.4 | 0.0212             | 3.2  | 0.28        | 135.5                           | 4.3  | 128.5              | 13.7 | 2.4                | 263.0 |
| 08SE675-15                                   | 895        | 7671                                   | 9.3   | 20.1339            | 8.2  | 0.1459             | 9.9  | 0.0213             | 5.6  | 0.57        | 135.9                           | 7.5  | 138.3              | 12.8 | 179.4              | 190.7 |
| 08SE675-16                                   | 299        | 3974                                   | 3.6   | 19.0766            | 18.8 | 0.1416             | 19.2 | 0.0196             | 3.8  | 0.20        | 125.1                           | 4.7  | 134.5              | 24.2 | 303.8              | 432.3 |
| 08SE675-17                                   | 1274       | 20557                                  | 16.5  | 21.2008            | 5.0  | 0.1201             | 7.1  | 0.0185             | 5.0  | 0.71        | 118.0                           | 5.9  | 115.2              | 7.7  | 57.7               | 118.1 |
| 08SE675-19                                   | 819        | 10870                                  | 2.5   | 21.3538            | 7.7  | 0.1360             | 8.4  | 0.0211             | 3.2  | 0.38        | 134.4                           | 4.2  | 129.5              | 10.2 | 40.6               | 185.5 |
| 08SE675-20                                   | 436        | 11268                                  | 3.0   | 19.2403            | 11.6 | 0.1578             | 12.0 | 0.0220             | 3.0  | 0.25        | 140.4                           | 4.2  | 148.8              | 16.6 | 284.3              | 266.9 |
| 08SE675-21                                   | 594        | 6157                                   | 4.0   | 22.5718            | 11.3 | 0.1315             | 12.5 | 0.0215             | 5.4  | 0.43        | 137.3                           | 7.4  | 125.4              | 14.8 | -93.8              | 278.1 |
| 08SE675-22                                   | 1113       | 22556                                  | 7.5   | 21.0778            | 4.4  | 0.1481             | 5.2  | 0.0226             | 2.7  | 0.52        | 144.3                           | 3.8  | 140.2              | 6.8  | 71.6               | 104.8 |
| 08SE675-23                                   | 1801       | 30920                                  | 160.5 | 21.1268            | 9.2  | 0.0977             | 11.4 | 0.0150             | 6.6  | 0.58        | 95.8                            | 6.3  | 94.7               | 10.3 | 66.1               | 220.1 |
| 08SE675-24                                   | 401        | 7755                                   | 2.7   | 20.4201            | 8.1  | 0.1441             | 10.6 | 0.0213             | 6.9  | 0.65        | 136.1                           | 9.3  | 136.7              | 13.6 | 146.5              | 190.3 |
| 08SE675-25                                   | 489        | 5128                                   | 3.7   | 20.3677            | 15.1 | 0.1196             | 15.9 | 0.0177             | 5.2  | 0.32        | 112.9                           | 5.8  | 114.7              | 17.3 | 152.5              | 354.9 |
| 08SE675-26                                   | 515        | 23121                                  | 3.6   | 22.1123            | 9.5  | 0.1352             | 10.5 | 0.0217             | 4.4  | 0.42        | 138.3                           | 6.0  | 128.8              | 12.7 | -43.6              | 232.1 |
| 08SE675-27                                   | 409        | 6936                                   | 3.1   | 21.5611            | 10.9 | 0.1295             | 12.8 | 0.0203             | 6.8  | 0.53        | 129.3                           | 8.7  | 123.7              | 14.9 | 17.4               | 262.2 |
| 08SE675-28                                   | 494        | 46545                                  | 3.0   | 21.2332            | 9.8  | 0.1517             | 10.6 | 0.0234             | 4.0  | 0.38        | 148.9                           | 5.9  | 143.4              | 14.1 | 54.1               | 233.7 |
| 08SE675-30                                   | 1027       | 27804                                  | 3.7   | 21.1113            | 5.3  | 0.1471             | 5.4  | 0.0225             | 1.3  | 0.25        | 143.5                           | 1.9  | 139.3              | 7.1  | 67.8               | 125.0 |
| 08SE675-31                                   | 645        | 12925                                  | 5.4   | 19.7998            | 6.8  | 0.1493             | 9.9  | 0.0214             | 7.2  | 0.73        | 136.8                           | 9.7  | 141.3              | 13.1 | 218.3              | 157.6 |
| 08SE675-32                                   | 253        | 4935                                   | 3.3   | 22.2958            | 19.6 | 0.1282             | 19.9 | 0.0207             | 3.4  | 0.17        | 132.3                           | 4.5  | 122.5              | 23.0 | -63.7              | 483.1 |
| 08SE675-33                                   | 273        | 3566                                   | 3.7   | 26.2611            | 32.8 | 0.1105             | 33.0 | 0.0210             | 4.2  | 0.13        | 134.2                           | 5.6  | 106.4              | 33.4 | -479.7             | 888.3 |
| 08SE675-34                                   | 338        | 9288                                   | 3.6   | 23.7283            | 10.2 | 0.1250             | 11.3 | 0.0215             | 4.9  | 0.43        | 137.2                           | 6.6  | 119.6              | 12.7 | -217.9             | 257.0 |
| 08SE675-35                                   | 518        | 6897                                   | 6.2   | 22.5017            | 12.4 | 0.1274             | 12.8 | 0.0208             | 3.5  | 0.27        | 132.6                           | 4.6  | 121.7              | 14.7 | -86.2              | 303.7 |
| 08SE675-36                                   | 836        | 13539                                  | 11.6  | 21.4516            | 15.1 | 0.1168             | 17.0 | 0.0182             | 7.9  | 0.46        | 116.1                           | 9.1  | 112.2              | 18.1 | 29.6               | 363.2 |
| 08SE675-37                                   | 657        | 13713                                  | 8.2   | 19.9618            | 12.3 | 0.1419             | 12.6 | 0.0205             | 2.7  | 0.22        | 131.1                           | 3.6  | 134.7              | 15.9 | 199.4              | 286.1 |
| 08SE675-39                                   | 495        | 8459                                   | 7.9   | 19.6270            | 13.9 | 0.1480             | 14.0 | 0.0211             | 2.0  | 0.14        | 134.4                           | 2.7  | 140.2              | 18.4 | 238.6              | 321.7 |
| 08SE675-40                                   | 380        | 4519                                   | 4.1   | 17.0878            | 15.6 | 0.1583             | 15.8 | 0.0196             | 2.8  | 0.18        | 125.2                           | 3.4  | 149.2              | 22.0 | 549.4              | 342.3 |
| 08SE675-43                                   | 463        | 7201                                   | 3.0   | 22.5705            | 20.2 | 0.1294             | 20.3 | 0.0212             | 2.4  | 0.12        | 135.1                           | 3.2  | 123.6              | 23.7 | -93.7              | 499.8 |
| 08SE675-44                                   | 622        | 18023                                  | 2.0   | 21.4831            | 16.9 | 0.1375             | 17.0 | 0.0214             | 2.0  | 0.11        | 136.7                           | 2.6  | 130.8              | 20.9 | 26.1               | 407.3 |
| 08SE675-45                                   | 696        | 12763                                  | 2.5   | 19.8305            | 8.7  | 0.1296             | 16.4 | 0.0186             | 13.9 | 0.85        | 119.1                           | 16.4 | 123.7              | 19.1 | 214.7              | 202.3 |
| 08SE675-46                                   | 1142       | 7593                                   | 18.6  | 21.1630            | 6.2  | 0.1150             | 6.6  | 0.0176             | 2.3  | 0.35        | 112.8                           | 2.6  | 110.5              | 6.9  | 62.0               | 147.5 |
| 08SE675-47                                   | 939        | 18859                                  | 3.0   | 20.2311            | 6.4  | 0.1477             | 6.8  | 0.0217             | 2.2  | 0.32        | 138.2                           | 3.0  | 139.8              | 8.8  | 168.2              | 150.0 |
| 08SE675-49                                   | 335        | 18324                                  | 1.3   | 16.1509            | 5.3  | 0.6671             | 9.0  | 0.0781             | 7.3  | 0.81        | 485.0                           | 34.0 | 518.9              | 36.6 | 671.2              | 113.8 |
| 08SE675-50                                   | 578        | 12599                                  | 4.7   | 21.2336            | 7.3  | 0.1422             | 8.1  | 0.0219             | 3.6  | 0.45        | 139.6                           | 5.0  | 135.0              | 10.3 | 54.1               | 174.0 |
| <i>Sample 07SE94 San Emigdio gneiss</i>      |            |                                        |       |                    |      |                    |      |                    |      |             |                                 |      |                    |      |                    |       |
| 27-1                                         | 433        | 8838                                   | 16.3  | 21.0208            | 2.3  | 0.1069             | 2.7  | 0.0163             | 1.4  | 0.53        | 104.2                           | 1.5  | 103.2              | 2.7  | 78.0               | 55.3  |
| 27-2                                         | 277        | 2952                                   | 2.1   | 21.6998            | 4.9  | 0.1001             | 5.4  | 0.0157             | 2.2  | 0.40        | 100.7                           | 2.1  | 96.8               | 5.0  | 2.0                | 118.5 |
| 27-3                                         | 285        | 4476                                   | 4.5   | 22.0675            | 8.2  | 0.1029             | 8.3  | 0.0165             | 1.1  | 0.13        | 105.3                           | 1.1  | 99.5               | 7.8  | -38.6              | 199.2 |
| 27-4                                         | 279        | 4308                                   | 5.5   | 21.5098            | 5.9  | 0.1020             | 6.0  | 0.0159             | 1.1  | 0.18        | 101.8                           | 1.1  | 98.6               | 5.6  | 23.1               | 141.7 |
| 27-5                                         | 239        | 2682                                   | 1.9   | 21.5648            | 5.7  | 0.1055             | 6.1  | 0.0165             | 2.2  | 0.36        | 105.5                           | 2.3  | 101.9              | 5.9  | 17.0               | 136.2 |
| 27-6                                         | 178        | 2610                                   | 2.4   | 21.8854            | 9.5  | 0.1023             | 9.6  | 0.0162             | 1.4  | 0.14        | 103.8                           | 1.4  | 98.9               | 9.1  | -18.6              | 231.1 |
| 27-7                                         | 160        | 2469                                   | 3.1   | 22.7410            | 11.8 | 0.0987             | 12.1 | 0.0163             | 2.5  | 0.20        | 104.1                           | 2.5  | 95.6               | 11.0 | -112.2             | 291.4 |
| 27-8                                         | 243        | 2916                                   | 2.0   | 21.7643            | 6.3  | 0.1049             | 6.4  | 0.0166             | 1.0  | 0.15        | 105.9                           | 1.0  | 101.3              | 6.2  | -5.2               | 152.4 |
| 27-9                                         | 234        | 3267                                   | 2.7   | 21.9974            | 7.3  | 0.1001             | 7.5  | 0.0160             | 1.7  | 0.22        | 102.1                           | 1.7  | 96.8               | 6.9  | -30.9              | 178.0 |
| 27-10                                        | 195        | 2544                                   | 2.3   | 23.6344            | 12.5 | 0.0965             | 12.6 | 0.0165             | 1.6  | 0.13        | 105.8                           | 1.7  | 93.6               | 11.3 | -208.0             | 315.1 |
| 27-11                                        | 190        | 2886                                   | 2.5   | 20.6468            | 7.6  | 0.1112             | 7.9  | 0.0167             | 2.3  | 0.29        | 106.5                           | 2.5  | 107.1              | 8.0  | 120.5              | 178.1 |
| 27-12                                        | 257        | 4539                                   | 3.1   | 21.5127            | 6.9  | 0.1053             | 7.1  | 0.0164             | 1.4  | 0.19        | 105.1                           | 1.4  | 101.7              | 6.9  | 22.8               | 166.9 |

Table SD1 (Continued).

| Analysis  | U<br>(ppm) | <sup>206</sup> Pb<br><sup>204</sup> Pb | U/Th  | Isotope ratios     |      |                    |      |                    |     |             | Isotopic ages (Ma) <sup>§</sup> |      |                    |      |                    |       |
|-----------|------------|----------------------------------------|-------|--------------------|------|--------------------|------|--------------------|-----|-------------|---------------------------------|------|--------------------|------|--------------------|-------|
|           |            |                                        |       | <sup>206</sup> Pb* | ±    | <sup>207</sup> Pb* | ±    | <sup>206</sup> Pb* | ±   | Error       | <sup>206</sup> Pb*              | ±    | <sup>207</sup> Pb* | ±    | <sup>206</sup> Pb* | ±     |
|           |            |                                        |       | <sup>207</sup> Pb* | (%)  | <sup>235</sup> U*  | (%)  | <sup>238</sup> U   | (%) | correlation | <sup>238</sup> U                | (Ma) | <sup>235</sup> U*  | (Ma) | <sup>207</sup> Pb* | (Ma)  |
| 27-13     | 175        | 3276                                   | 6.0   | 21.5512            | 10.1 | 0.1051             | 10.2 | 0.0164             | 0.7 | 0.07        | 105.1                           | 0.7  | 101.5              | 9.8  | 18.5               | 243.8 |
| 27-14     | 239        | 3315                                   | 2.6   | 22.0071            | 7.6  | 0.1035             | 7.6  | 0.0165             | 0.5 | 0.07        | 105.7                           | 0.6  | 100.0              | 7.3  | -32.0              | 185.0 |
| 27-15     | 360        | 5952                                   | 15.1  | 19.9602            | 4.9  | 0.1108             | 5.7  | 0.0160             | 3.0 | 0.52        | 102.6                           | 3.0  | 106.7              | 5.8  | 199.6              | 113.4 |
| 27-16     | 307        | 4839                                   | 12.6  | 20.7770            | 5.3  | 0.1076             | 5.6  | 0.0162             | 2.0 | 0.36        | 103.7                           | 2.1  | 103.8              | 5.5  | 105.7              | 124.2 |
| 27-17     | 259        | 3480                                   | 2.8   | 22.6867            | 9.1  | 0.0981             | 9.4  | 0.0161             | 2.1 | 0.22        | 103.2                           | 2.1  | 95.0               | 8.5  | -106.3             | 224.8 |
| 27-18     | 286        | 3840                                   | 2.4   | 20.9770            | 6.2  | 0.1107             | 6.4  | 0.0168             | 1.7 | 0.26        | 107.7                           | 1.8  | 106.6              | 6.5  | 83.0               | 147.9 |
| 27-19     | 252        | 2733                                   | 2.0   | 22.7085            | 9.2  | 0.1015             | 9.2  | 0.0167             | 0.8 | 0.08        | 106.9                           | 0.8  | 98.2               | 8.6  | -108.7             | 226.5 |
| 27-20     | 331        | 6015                                   | 31.3  | 21.0752            | 3.6  | 0.1044             | 3.8  | 0.0160             | 1.2 | 0.32        | 102.1                           | 1.2  | 100.8              | 3.6  | 71.9               | 84.7  |
| 27-21     | 322        | 3240                                   | 2.0   | 21.9231            | 6.8  | 0.1015             | 6.9  | 0.0161             | 1.0 | 0.15        | 103.2                           | 1.0  | 98.2               | 6.5  | -22.7              | 165.5 |
| 27-22     | 337        | 5661                                   | 5.1   | 21.7005            | 5.4  | 0.1057             | 5.5  | 0.0166             | 1.2 | 0.23        | 106.4                           | 1.3  | 102.0              | 5.3  | 1.9                | 129.4 |
| 27-23     | 245        | 3213                                   | 2.8   | 22.3326            | 8.1  | 0.1028             | 8.3  | 0.0167             | 1.6 | 0.20        | 106.5                           | 1.7  | 99.4               | 7.8  | -67.7              | 198.4 |
| 27-24     | 103        | 2169                                   | 6.8   | 22.7181            | 11.4 | 0.1144             | 12.5 | 0.0188             | 5.2 | 0.42        | 120.4                           | 6.2  | 110.0              | 13.1 | -109.7             | 281.3 |
| 27-25     | 181        | 2475                                   | 2.8   | 21.9956            | 8.5  | 0.1022             | 8.7  | 0.0163             | 1.6 | 0.19        | 104.2                           | 1.7  | 98.8               | 8.2  | -30.7              | 207.6 |
| 27-26     | 408        | 6591                                   | 3.0   | 21.3932            | 4.7  | 0.1046             | 4.9  | 0.0162             | 1.4 | 0.29        | 103.8                           | 1.5  | 101.0              | 4.7  | 36.1               | 112.4 |
| 27-27     | 119        | 2229                                   | 9.7   | 22.6483            | 10.5 | 0.1011             | 10.8 | 0.0166             | 2.5 | 0.24        | 106.1                           | 2.7  | 97.8               | 10.0 | -102.1             | 258.1 |
| 27-28     | 228        | 3435                                   | 2.9   | 21.7162            | 9.5  | 0.1057             | 10.1 | 0.0166             | 3.5 | 0.35        | 106.4                           | 3.7  | 102.0              | 9.8  | 0.1                | 228.6 |
| 27-29     | 129        | 2556                                   | 5.6   | 22.6098            | 20.3 | 0.1016             | 20.4 | 0.0167             | 1.6 | 0.08        | 106.6                           | 1.7  | 98.3               | 19.1 | -98.0              | 503.5 |
| 27-30     | 1484       | 20493                                  | 2.4   | 20.5760            | 1.9  | 0.1130             | 3.8  | 0.0169             | 3.3 | 0.87        | 107.8                           | 3.5  | 108.7              | 3.9  | 128.6              | 44.0  |
| 27-31     | 734        | 6510                                   | 3.3   | 21.0501            | 4.2  | 0.1065             | 4.5  | 0.0163             | 1.5 | 0.34        | 104.0                           | 1.6  | 102.8              | 4.4  | 74.7               | 99.6  |
| 27-32     | 419        | 5151                                   | 2.3   | 21.1652            | 2.4  | 0.1046             | 2.7  | 0.0161             | 1.3 | 0.47        | 102.7                           | 1.3  | 101.0              | 2.6  | 61.7               | 56.7  |
| 27-33     | 126        | 1845                                   | 107.9 | 25.2037            | 18.5 | 0.0867             | 18.6 | 0.0159             | 1.0 | 0.05        | 101.4                           | 1.0  | 84.5               | 15.1 | -372.0             | 484.3 |
| 27-34     | 228        | 4095                                   | 128.5 | 21.9015            | 8.4  | 0.1023             | 8.6  | 0.0162             | 2.0 | 0.23        | 103.9                           | 2.0  | 98.9               | 8.1  | -20.4              | 204.1 |
| 27-35     | 594        | 8811                                   | 11.2  | 20.9911            | 5.0  | 0.1055             | 5.9  | 0.0161             | 3.1 | 0.53        | 102.7                           | 3.2  | 101.8              | 5.7  | 81.4               | 119.5 |
| 27-36     | 156        | 2448                                   | 4.8   | 22.5830            | 8.9  | 0.0986             | 8.9  | 0.0161             | 0.7 | 0.08        | 103.2                           | 0.7  | 95.5               | 8.1  | -95.1              | 217.7 |
| 27-37     | 283        | 2937                                   | 2.1   | 21.7050            | 7.6  | 0.1056             | 7.6  | 0.0166             | 0.7 | 0.09        | 106.3                           | 0.7  | 101.9              | 7.4  | 1.4                | 182.5 |
| 27-38     | 119        | 1698                                   | 4.9   | 24.3041            | 15.2 | 0.0914             | 15.8 | 0.0161             | 4.4 | 0.28        | 103.1                           | 4.5  | 88.8               | 13.5 | -278.6             | 389.0 |
| 27-39     | 134        | 2538                                   | 11.4  | 23.9548            | 15.7 | 0.0914             | 15.7 | 0.0159             | 1.7 | 0.11        | 101.6                           | 1.7  | 88.8               | 13.4 | -241.9             | 397.4 |
| 27-40     | 183        | 2460                                   | 2.2   | 23.2374            | 11.8 | 0.0984             | 12.1 | 0.0166             | 2.6 | 0.21        | 106.1                           | 2.7  | 95.3               | 11.0 | -165.6             | 294.3 |
| 94TEHA-1  | 293        | 4935                                   | 1.3   | 21.8237            | 7.9  | 0.1093             | 8.0  | 0.0173             | 1.3 | 0.16        | 110.5                           | 1.4  | 105.3              | 8.0  | -11.7              | 191.0 |
| 94TEHA-2  | 633        | 9811                                   | 8.5   | 21.3445            | 1.9  | 0.1047             | 2.8  | 0.0162             | 2.1 | 0.73        | 103.7                           | 2.1  | 101.1              | 2.7  | 41.6               | 45.9  |
| 94TEHA-3  | 888        | 14049                                  | 1.3   | 21.0014            | 1.7  | 0.1119             | 2.4  | 0.0170             | 1.6 | 0.69        | 108.9                           | 1.8  | 107.7              | 2.4  | 80.2               | 40.8  |
| 94TEHA-4  | 542        | 9033                                   | 2.5   | 20.8477            | 2.5  | 0.1152             | 3.4  | 0.0174             | 2.3 | 0.68        | 111.3                           | 2.5  | 110.7              | 3.5  | 97.7               | 58.3  |
| 94TEHA-5  | 111        | 2073                                   | 9.3   | 28.2391            | 14.9 | 0.0841             | 15.0 | 0.0172             | 1.6 | 0.11        | 110.1                           | 1.8  | 82.0               | 11.8 | -676.2             | 413.9 |
| 94TEHA-6  | 246        | 3857                                   | 1.7   | 22.8293            | 8.2  | 0.1014             | 8.3  | 0.0168             | 1.0 | 0.11        | 107.3                           | 1.0  | 98.0               | 7.8  | -121.7             | 203.7 |
| 94TEHA-7  | 269        | 5031                                   | 1.7   | 22.7540            | 5.6  | 0.1036             | 5.9  | 0.0171             | 1.7 | 0.30        | 109.3                           | 1.9  | 100.1              | 5.6  | -113.6             | 138.2 |
| 94TEHA-8  | 143        | 2673                                   | 3.4   | 23.9071            | 9.2  | 0.0967             | 9.4  | 0.0168             | 1.8 | 0.19        | 107.2                           | 1.9  | 93.7               | 8.4  | -236.8             | 232.1 |
| 94TEHA-9  | 103        | 1450                                   | 3.8   | 23.5290            | 13.6 | 0.0989             | 13.7 | 0.0169             | 1.2 | 0.09        | 107.9                           | 1.3  | 95.7               | 12.5 | -196.7             | 342.7 |
| 94TEHA-10 | 197        | 3466                                   | 32.7  | 23.3617            | 6.4  | 0.0976             | 6.8  | 0.0165             | 2.1 | 0.32        | 105.7                           | 2.3  | 94.6               | 6.1  | -178.9             | 160.9 |
| 94TEHA-11 | 141        | 2199                                   | 2.4   | 23.0436            | 15.2 | 0.1022             | 15.4 | 0.0171             | 2.1 | 0.14        | 109.2                           | 2.3  | 98.8               | 14.5 | -144.8             | 379.7 |
| 94TEHA-12 | 275        | 3333                                   | 1.4   | 22.0336            | 4.7  | 0.1068             | 5.0  | 0.0171             | 1.5 | 0.31        | 109.1                           | 1.6  | 103.1              | 4.9  | -34.9              | 114.5 |
| 94TEHA-13 | 1123       | 18526                                  | 1.3   | 20.8995            | 1.2  | 0.1148             | 2.0  | 0.0174             | 1.6 | 0.80        | 111.2                           | 1.7  | 110.4              | 2.0  | 91.7               | 27.6  |
| 94TEHA-14 | 1242       | 23902                                  | 6.5   | 20.6889            | 1.7  | 0.1142             | 2.6  | 0.0171             | 1.9 | 0.75        | 109.6                           | 2.1  | 109.8              | 2.7  | 115.7              | 40.5  |
| 94TEHA-15 | 571        | 9974                                   | 2.4   | 21.4022            | 3.6  | 0.1084             | 4.2  | 0.0168             | 2.1 | 0.51        | 107.5                           | 2.3  | 104.5              | 4.2  | 35.1               | 86.3  |
| 94TEHA-16 | 451        | 6651                                   | 15.1  | 21.5529            | 3.2  | 0.1015             | 4.2  | 0.0159             | 2.6 | 0.62        | 101.5                           | 2.6  | 98.2               | 3.9  | 18.3               | 78.0  |
| 94TEHA-17 | 204        | 3314                                   | 1.8   | 23.9008            | 5.5  | 0.0966             | 5.9  | 0.0167             | 2.0 | 0.34        | 107.1                           | 2.1  | 93.6               | 5.3  | -236.2             | 139.9 |
| 94TEHA-18 | 112        | 1796                                   | 2.8   | 27.0424            | 11.4 | 0.0869             | 11.4 | 0.0171             | 1.2 | 0.11        | 109.0                           | 1.3  | 84.6               | 9.3  | -558.0             | 306.9 |
| 94TEHA-20 | 174        | 2713                                   | 3.6   | 24.1690            | 11.6 | 0.0954             | 11.7 | 0.0167             | 1.3 | 0.11        | 106.9                           | 1.4  | 92.5               | 10.3 | -264.4             | 295.6 |
| 94TEHA-20 | 242        | 4071                                   | 3.0   | 22.9049            | 7.5  | 0.0989             | 7.6  | 0.0164             | 0.9 | 0.12        | 105.0                           | 1.0  | 95.7               | 6.9  | -129.9             | 185.8 |
| 94TEHA-21 | 246        | 5402                                   | 4.0   | 21.2992            | 6.7  | 0.1114             | 6.9  | 0.0172             | 1.3 | 0.19        | 110.0                           | 1.5  | 107.3              | 7.0  | 46.7               | 161.3 |
| 94TEHA-22 | 88         | 1389                                   | 3.7   | 21.9794            | 17.3 | 0.1081             | 17.4 | 0.0172             | 1.6 | 0.09        | 110.2                           | 1.8  | 104.2              | 17.3 | -28.9              | 422.9 |
| 94TEHA-23 | 116        | 2047                                   | 17.8  | 20.4760            | 12.5 | 0.1088             | 12.6 | 0.0162             | 1.2 | 0.10        | 103.3                           | 1.2  | 104.9              | 12.5 | 140.1              | 294.7 |
| 94TEHA-24 | 211        | 3447                                   | 2.1   | 22.6846            | 8.3  | 0.0996             | 8.6  | 0.0164             | 2.0 | 0.23        | 104.8                           | 2.1  | 96.4               | 7.9  | -106.0             | 205.3 |
| 94TEHA-25 | 502        | 11251                                  | 2.9   | 21.3073            | 3.6  | 0.1078             | 4.1  | 0.0167             | 2.0 | 0.48        | 106.5                           | 2.1  | 103.9              | 4.0  | 45.8               | 85.8  |
| 94TEHA-26 | 212        | 3301                                   | 1.8   | 23.8344            | 9.6  | 0.0972             | 9.7  | 0.0168             | 1.1 | 0.11        | 107.4                           | 1.1  | 94.2               | 8.7  | -229.1             | 242.3 |
| 94TEHA-27 | 165        | 2858                                   | 3.6   | 23.0071            | 13.5 | 0.1005             | 14.1 | 0.0168             | 4.0 | 0.29        | 107.2                           | 4.3  | 97.2               | 13.0 | -140.9             | 335.2 |
| 94TEHA-28 | 705        | 13558                                  | 2.3   | 21.0826            | 1.9  | 0.1115             | 2.2  | 0.0171             | 1.1 | 0.49        | 109.0                           | 1.2  | 107.4              | 2.2  | 71.1               | 45.8  |
| 94TEHA-29 | 236        | 5403                                   | 2.6   | 23.0051            | 5.7  | 0.1051             | 6.1  | 0.0175             | 2.3 | 0.37        | 112.1                           | 2.5  | 101.5              | 5.9  | -140.7             | 140.8 |
| 94TEHA-30 | 156        | 3332                                   | 2.1   | 23.7773            | 8.8  | 0.1011             | 8.9  | 0.0174             | 1.2 | 0.14        | 111.4                           | 1.3  | 97.8               | 8.3  | -223.1             | 222.6 |

Table SD1 (Continued).

| Analysis              | U<br>(ppm) | <sup>206</sup> Pb<br><sup>204</sup> Pb          | U/Th | Isotope ratios     |       |                    |       |                    |      | Error<br>correlation | Isotopic ages (Ma) <sup>§</sup> |      |                    |       |                    |        |
|-----------------------|------------|-------------------------------------------------|------|--------------------|-------|--------------------|-------|--------------------|------|----------------------|---------------------------------|------|--------------------|-------|--------------------|--------|
|                       |            |                                                 |      | <sup>206</sup> Pb* | ±     | <sup>207</sup> Pb* | ±     | <sup>206</sup> Pb* | ±    |                      | <sup>206</sup> Pb*              | ±    | <sup>207</sup> Pb* | ±     | <sup>206</sup> Pb* | ±      |
|                       |            |                                                 |      | <sup>207</sup> Pb* | (%)   | <sup>235</sup> U*  | (%)   | <sup>238</sup> U   | (%)  |                      | <sup>238</sup> U                | (Ma) | <sup>235</sup> U*  | (Ma)  | <sup>207</sup> Pb* | (Ma)   |
| 94TEHA-31             | 1425       | 22152                                           | 3.9  | 20.7180            | 1.4   | 0.1177             | 2.9   | 0.0177             | 2.6  | 0.88                 | 113.0                           | 2.9  | 113.0              | 3.1   | 112.4              | 32.1   |
| 94TEHA-32             | 256        | 4437                                            | 1.3  | 23.3885            | 7.1   | 0.0987             | 7.4   | 0.0167             | 1.9  | 0.26                 | 107.1                           | 2.0  | 95.6               | 6.7   | -181.8             | 177.8  |
| 94TEHA-33             | 1171       | 17383                                           | 2.2  | 21.1459            | 2.1   | 0.1094             | 2.7   | 0.0168             | 1.7  | 0.63                 | 107.2                           | 1.8  | 105.4              | 2.7   | 63.9               | 50.6   |
| 94TEHA-34             | 144        | 2849                                            | 3.8  | 22.3648            | 11.9  | 0.1131             | 12.3  | 0.0183             | 3.4  | 0.28                 | 117.2                           | 4.0  | 108.8              | 12.7  | -71.2              | 290.5  |
| <i>Sample 08SE450</i> |            | <i>San Emigdio gneiss</i>                       |      |                    |       |                    |       |                    |      |                      |                                 |      |                    |       |                    |        |
| 08SE450-1             | 235        | 7013                                            | 10.3 | 22.0545            | 23.0  | 0.1057             | 23.1  | 0.0169             | 2.5  | 0.11                 | 108.1                           | 2.6  | 102.0              | 22.4  | -37.2              | 564.3  |
| 08SE450-3             | 356        | 11989                                           | 15.1 | 20.0824            | 15.5  | 0.1138             | 15.6  | 0.0166             | 2.3  | 0.15                 | 106.0                           | 2.4  | 109.4              | 16.2  | 185.4              | 362.3  |
| 08SE450-4             | 241        | 6047                                            | 8.0  | 19.0617            | 11.5  | 0.1173             | 11.7  | 0.0162             | 2.0  | 0.17                 | 103.7                           | 2.1  | 112.7              | 12.5  | 305.5              | 262.7  |
| 08SE450-5             | 232        | 6026                                            | 13.0 | 22.6181            | 23.2  | 0.0985             | 23.4  | 0.0162             | 2.6  | 0.11                 | 103.3                           | 2.7  | 95.4               | 21.3  | -98.8              | 577.0  |
| <i>Sample 08SE674</i> |            | <i>Digier Canyon / White Oak diorite gneiss</i> |      |                    |       |                    |       |                    |      |                      |                                 |      |                    |       |                    |        |
| 08SE674-1             | 69         | 2219                                            | 2.8  | 11.0640            | 256.4 | 0.2279             | 256.5 | 0.0183             | 3.3  | 0.01                 | 116.8                           | 3.9  | 208.5              | 525.7 | 1433.6             | 854.5  |
| 08SE674-2             | 82         | 2241                                            | 3.4  | 45.3271            | 102.6 | 0.0578             | 102.6 | 0.0190             | 3.1  | 0.03                 | 121.3                           | 3.7  | 57.0               | 57.0  | -2226.5            | 0.0    |
| 08SE674-3             | 50         | 1617                                            | 5.1  | 18.5116            | 107.3 | 0.1318             | 107.5 | 0.0177             | 5.0  | 0.05                 | 113.1                           | 5.6  | 125.7              | 127.7 | 371.9              | 807.7  |
| 08SE674-4             | 40         | 1098                                            | 4.0  | 11.3054            | 81.5  | 0.2224             | 81.7  | 0.0182             | 5.9  | 0.07                 | 116.5                           | 6.8  | 203.9              | 152.1 | 1392.3             | 2019.8 |
| 08SE674-5             | 70         | 2803                                            | 2.6  | 12.1203            | 337.8 | 0.2102             | 337.9 | 0.0185             | 3.3  | 0.01                 | 118.0                           | 3.9  | 193.7              | 683.2 | 1257.6             | 1453.0 |
| 08SE674-6             | 539        | 14939                                           | 3.1  | 21.6886            | 12.6  | 0.1315             | 12.7  | 0.0207             | 1.9  | 0.15                 | 132.0                           | 2.4  | 125.4              | 15.0  | 3.2                | 304.1  |
| 08SE674-7             | 73         | 3000                                            | 5.0  | 20.5444            | 45.3  | 0.1293             | 45.4  | 0.0193             | 2.3  | 0.05                 | 123.0                           | 2.8  | 123.5              | 52.8  | 132.2              | 1118.2 |
| 08SE674-8             | 71         | 2830                                            | 2.4  | 25.8696            | 39.0  | 0.0979             | 39.2  | 0.0184             | 3.9  | 0.10                 | 117.4                           | 4.5  | 94.9               | 35.5  | -440.0             | 1059.8 |
| 08SE674-10            | 58         | 2108                                            | 2.6  | 34.0135            | 65.8  | 0.0798             | 66.0  | 0.0197             | 4.7  | 0.07                 | 125.6                           | 5.8  | 77.9               | 49.5  | -1221.4            | 2271.7 |
| 08SE674-12            | 65         | 2227                                            | 4.6  | 18.1738            | 32.2  | 0.1468             | 32.4  | 0.0194             | 3.6  | 0.11                 | 123.6                           | 4.3  | 139.1              | 42.1  | 413.2              | 736.3  |
| 08SE674-13            | 61         | 2617                                            | 2.4  | 17.8599            | 67.1  | 0.1473             | 67.3  | 0.0191             | 4.6  | 0.07                 | 121.9                           | 5.5  | 139.5              | 87.9  | 452.0              | 1696.5 |
| 08SE674-14            | 97         | 3503                                            | 1.9  | 21.4863            | 45.1  | 0.1249             | 45.2  | 0.0195             | 1.4  | 0.03                 | 124.3                           | 1.7  | 119.5              | 51.0  | 25.7               | 1135.5 |
| 08SE674-16            | 59         | 1848                                            | 2.6  | 20.3068            | 26.8  | 0.1239             | 27.2  | 0.0182             | 4.5  | 0.17                 | 116.6                           | 5.2  | 118.6              | 30.5  | 159.5              | 637.5  |
| 08SE674-17            | 55         | 2139                                            | 2.6  | 24.6029            | 36.2  | 0.1037             | 36.3  | 0.0185             | 3.3  | 0.09                 | 118.2                           | 3.8  | 100.2              | 34.7  | -309.8             | 953.5  |
| 08SE674-18            | 558        | 18249                                           | 3.1  | 20.2169            | 5.5   | 0.1337             | 6.0   | 0.0196             | 2.3  | 0.39                 | 125.1                           | 2.9  | 127.4              | 7.2   | 169.8              | 128.8  |
| 08SE674-19            | 88         | 4462                                            | 3.5  | 26.1089            | 50.9  | 0.1030             | 51.0  | 0.0195             | 3.3  | 0.06                 | 124.5                           | 4.0  | 99.5               | 48.4  | -464.3             | 1425.0 |
| 08SE674-20            | 56         | 2052                                            | 2.8  | 27.8642            | 66.2  | 0.0879             | 66.8  | 0.0178             | 8.9  | 0.13                 | 113.5                           | 10.0 | 85.5               | 54.9  | -639.4             | 2025.1 |
| 08SE674-22            | 173        | 11286                                           | 3.8  | 20.6582            | 16.9  | 0.1291             | 17.1  | 0.0193             | 2.6  | 0.15                 | 123.5                           | 3.1  | 123.3              | 19.9  | 119.2              | 401.4  |
| 08SE674-23            | 77         | 2269                                            | 3.0  | 22.0051            | 48.3  | 0.1164             | 48.4  | 0.0186             | 2.6  | 0.05                 | 118.6                           | 3.1  | 111.8              | 51.3  | -31.8              | 1238.4 |
| 08SE674-24            | 91         | 2906                                            | 3.1  | 18.3236            | 34.8  | 0.1422             | 35.0  | 0.0189             | 3.3  | 0.09                 | 120.7                           | 4.0  | 135.0              | 44.3  | 394.8              | 803.6  |
| 08SE674-25            | 55         | 2404                                            | 4.8  | 16.7161            | 130.5 | 0.1559             | 130.7 | 0.0189             | 5.7  | 0.04                 | 120.7                           | 6.8  | 147.1              | 180.8 | 597.2              | 814.6  |
| 08SE674-27            | 53         | 1709                                            | 2.8  | 25.7656            | 36.2  | 0.0983             | 36.2  | 0.0184             | 1.6  | 0.04                 | 117.4                           | 1.9  | 95.2               | 32.9  | -429.4             | 976.4  |
| 08SE674-28            | 61         | 1912                                            | 2.4  | 16.5883            | 42.9  | 0.1559             | 42.9  | 0.0188             | 1.0  | 0.02                 | 119.8                           | 1.1  | 147.2              | 58.9  | 613.7              | 970.4  |
| 08SE674-29            | 87         | 2186                                            | 2.9  | 24.5042            | 31.3  | 0.1109             | 31.3  | 0.0197             | 1.3  | 0.04                 | 125.8                           | 1.6  | 106.8              | 31.7  | -299.5             | 816.4  |
| <i>Sample 08SE679</i> |            | <i>Digier Canyon / White Oak diorite gneiss</i> |      |                    |       |                    |       |                    |      |                      |                                 |      |                    |       |                    |        |
| 08SE679-1             | 197        | 7184                                            | 2.6  | 14.8322            | 88.4  | 0.1503             | 88.5  | 0.0162             | 5.3  | 0.06                 | 103.4                           | 5.4  | 142.2              | 118.0 | 850.8              | 323.3  |
| 08SE679-2             | 91         | 1339                                            | 2.9  | 14.4713            | 47.1  | 0.1647             | 47.6  | 0.0173             | 6.7  | 0.14                 | 110.5                           | 7.3  | 154.8              | 68.4  | 901.8              | 1029.5 |
| 08SE679-3             | 70         | 980                                             | 2.9  | 24.3888            | 79.9  | 0.0927             | 80.0  | 0.0164             | 4.1  | 0.05                 | 104.8                           | 4.3  | 90.0               | 69.0  | -287.4             | 2478.8 |
| 08SE679-5             | 86         | 575                                             | 3.0  | 14.8530            | 89.7  | 0.1508             | 90.2  | 0.0162             | 9.3  | 0.10                 | 103.9                           | 9.6  | 142.6              | 120.6 | 847.9              | 335.3  |
| 08SE679-11            | 490        | 8233                                            | 1.5  | 21.8573            | 30.2  | 0.1040             | 31.9  | 0.0165             | 10.2 | 0.32                 | 105.4                           | 10.6 | 100.4              | 30.5  | -15.4              | 744.7  |
| <i>Sample 04SE5</i>   |            | <i>Lebec granodiorite</i>                       |      |                    |       |                    |       |                    |      |                      |                                 |      |                    |       |                    |        |
| 04SE5-1               | 605        | 8322                                            | 4.0  | 21.8860            | 6.9   | 0.0952             | 7.2   | 0.0151             | 2.0  | 0.27                 | 96.7                            | 1.9  | 92.3               | 6.3   | -18.6              | 167.3  |
| 04SE5-2               | 278        | 4773                                            | 1.8  | 18.9386            | 15.3  | 0.1045             | 15.6  | 0.0144             | 2.9  | 0.18                 | 91.9                            | 2.6  | 100.9              | 15.0  | 320.3              | 349.5  |
| 04SE5-3               | 340        | 9520                                            | 2.1  | 28.6821            | 22.2  | 0.0673             | 22.5  | 0.0140             | 3.5  | 0.15                 | 89.7                            | 3.1  | 66.2               | 14.4  | -719.4             | 625.1  |
| 04SE5-5               | 515        | 11995                                           | 3.2  | 21.1496            | 10.8  | 0.0986             | 11.0  | 0.0151             | 1.7  | 0.15                 | 96.7                            | 1.6  | 95.4               | 10.0  | 63.5               | 258.7  |
| 04SE5-6               | 166        | 3916                                            | 2.8  | 35.0469            | 50.1  | 0.0543             | 50.2  | 0.0138             | 3.4  | 0.07                 | 88.4                            | 3.0  | 53.7               | 26.3  | -1315.7            | 1681.2 |
| 04SE5-7               | 209        | 5324                                            | 3.1  | 22.6739            | 23.0  | 0.0859             | 23.0  | 0.0141             | 2.0  | 0.09                 | 90.4                            | 1.8  | 83.7               | 18.5  | -104.9             | 571.1  |
| 04SE5-8               | 133        | 2780                                            | 2.5  | 23.7710            | 64.0  | 0.0811             | 64.0  | 0.0140             | 2.6  | 0.04                 | 89.5                            | 2.3  | 79.2               | 48.8  | -222.4             | 1787.3 |
| 04SE5-9               | 189        | 2348                                            | 2.9  | 23.9632            | 19.5  | 0.0829             | 19.5  | 0.0144             | 0.7  | 0.04                 | 92.2                            | 0.7  | 80.8               | 15.2  | -242.7             | 497.4  |
| 04SE5-10              | 191        | 3345                                            | 2.4  | 27.3170            | 41.2  | 0.0691             | 41.2  | 0.0137             | 1.9  | 0.04                 | 87.6                            | 1.6  | 67.8               | 27.1  | -585.4             | 1157.3 |
| 04SE5-11              | 304        | 8419                                            | 3.8  | 20.4331            | 15.5  | 0.0985             | 15.9  | 0.0146             | 3.6  | 0.22                 | 93.5                            | 3.3  | 95.4               | 14.5  | 144.9              | 365.0  |
| 04SE5-12              | 140        | 3610                                            | 2.2  | 18.6085            | 21.7  | 0.1065             | 21.8  | 0.0144             | 2.4  | 0.11                 | 92.0                            | 2.2  | 102.8              | 21.3  | 360.1              | 494.6  |
| 04SE5-13              | 181        | 2528                                            | 2.3  | 24.2622            | 29.8  | 0.0845             | 29.9  | 0.0149             | 2.9  | 0.10                 | 95.2                            | 2.7  | 82.4               | 23.7  | -274.2             | 771.4  |
| 04SE5-14              | 151        | 2495                                            | 2.8  | 34.3906            | 40.8  | 0.0590             | 40.8  | 0.0147             | 1.3  | 0.03                 | 94.2                            | 1.2  | 58.2               | 23.1  | -1255.9            | 1325.1 |

Table SD1 (Continued).

| Analysis | U<br>(ppm) | <sup>206</sup> Pb<br><sup>204</sup> Pb | U/Th | Isotope ratios     |      |                    |      |                    |     |             | Isotopic ages (Ma) <sup>§</sup> |      |                    |      |                    |       |
|----------|------------|----------------------------------------|------|--------------------|------|--------------------|------|--------------------|-----|-------------|---------------------------------|------|--------------------|------|--------------------|-------|
|          |            |                                        |      | <sup>206</sup> Pb* | ±    | <sup>207</sup> Pb* | ±    | <sup>206</sup> Pb* | ±   | Error       | <sup>206</sup> Pb*              | ±    | <sup>207</sup> Pb* | ±    | <sup>206</sup> Pb* | ±     |
|          |            |                                        |      | <sup>207</sup> Pb* | (%)  | <sup>235</sup> U*  | (%)  | <sup>238</sup> U   | (%) | correlation | <sup>238</sup> U                | (Ma) | <sup>235</sup> U*  | (Ma) | <sup>207</sup> Pb* | (Ma)  |
| 04SE5-15 | 179        | 4504                                   | 2.9  | 21.8174            | 24.4 | 0.0902             | 24.8 | 0.0143             | 4.6 | 0.19        | 91.4                            | 4.2  | 87.7               | 20.8 | -11.0              | 595.8 |
| 04SE5-16 | 160        | 3109                                   | 2.6  | 24.3913            | 12.9 | 0.0801             | 13.2 | 0.0142             | 2.7 | 0.21        | 90.8                            | 2.5  | 78.3               | 9.9  | -287.7             | 330.4 |
| 04SE5-17 | 226        | 5990                                   | 1.9  | 20.2734            | 18.3 | 0.0991             | 18.5 | 0.0146             | 2.8 | 0.15        | 93.3                            | 2.6  | 96.0               | 17.0 | 163.3              | 431.3 |
| 04SE5-18 | 142        | 3393                                   | 2.2  | 20.6756            | 28.1 | 0.0973             | 28.3 | 0.0146             | 3.1 | 0.11        | 93.3                            | 2.9  | 94.2               | 25.5 | 117.2              | 674.8 |
| 04SE5-19 | 238        | 4906                                   | 2.7  | 20.6180            | 26.4 | 0.0968             | 26.5 | 0.0145             | 2.4 | 0.09        | 92.6                            | 2.2  | 93.8               | 23.8 | 123.8              | 632.1 |
| 04SE5-20 | 174        | 5608                                   | 2.7  | 27.4217            | 19.9 | 0.0708             | 20.7 | 0.0141             | 5.8 | 0.28        | 90.1                            | 5.2  | 69.4               | 13.9 | -595.7             | 544.9 |
| 04SE5-21 | 179        | 4652                                   | 2.8  | 24.8690            | 28.2 | 0.0786             | 28.3 | 0.0142             | 2.9 | 0.10        | 90.7                            | 2.6  | 76.8               | 20.9 | -337.4             | 737.0 |
| 04SE5-22 | 183        | 4319                                   | 3.0  | 22.1465            | 26.4 | 0.0974             | 26.5 | 0.0156             | 1.0 | 0.04        | 100.0                           | 1.0  | 94.3               | 23.8 | -47.3              | 652.7 |
| 04SE5-23 | 296        | 5626                                   | 3.3  | 21.5268            | 17.1 | 0.0910             | 17.2 | 0.0142             | 1.6 | 0.09        | 91.0                            | 1.4  | 88.4               | 14.5 | 21.3               | 413.0 |
| 04SE5-24 | 194        | 4393                                   | 3.1  | 21.1137            | 27.2 | 0.0870             | 27.6 | 0.0133             | 4.6 | 0.17        | 85.3                            | 3.9  | 84.7               | 22.4 | 67.6               | 657.2 |
| 04SE5-25 | 441        | 8765                                   | 2.0  | 21.9293            | 16.2 | 0.0895             | 16.2 | 0.0142             | 1.4 | 0.09        | 91.1                            | 1.3  | 87.0               | 13.5 | -23.4              | 393.8 |
| 04SE5-26 | 295        | 9764                                   | 2.8  | 22.5662            | 26.5 | 0.0887             | 26.5 | 0.0145             | 1.3 | 0.05        | 92.9                            | 1.2  | 86.3               | 21.9 | -93.2              | 659.8 |
| 04SE5-27 | 196        | 4638                                   | 2.9  | 24.5805            | 15.9 | 0.0804             | 16.1 | 0.0143             | 2.7 | 0.17        | 91.8                            | 2.5  | 78.5               | 12.2 | -307.4             | 409.1 |
| 04SE5-28 | 124        | 3138                                   | 3.5  | 19.6592            | 30.3 | 0.0993             | 30.6 | 0.0142             | 4.4 | 0.14        | 90.7                            | 4.0  | 96.2               | 28.1 | 234.8              | 712.8 |
| 04SE5-29 | 225        | 4076                                   | 1.8  | 26.7039            | 30.7 | 0.0708             | 31.4 | 0.0137             | 6.4 | 0.20        | 87.7                            | 5.6  | 69.4               | 21.1 | -524.2             | 838.8 |
| 04SE5-30 | 269        | 5708                                   | 2.2  | 23.3959            | 12.9 | 0.0828             | 13.0 | 0.0140             | 1.2 | 0.09        | 89.9                            | 1.1  | 80.7               | 10.1 | -182.6             | 323.8 |

## Sample 06SE19a

## Lebec granodiorite

|            |      |       |      |         |      |        |      |        |      |      |       |      |       |      |        |       |
|------------|------|-------|------|---------|------|--------|------|--------|------|------|-------|------|-------|------|--------|-------|
| 06SE19A-1  | 883  | 3926  | 1.5  | 21.1983 | 20.0 | 0.0917 | 20.5 | 0.0141 | 4.3  | 0.21 | 90.2  | 3.8  | 89.0  | 17.5 | 58.0   | 482.0 |
| 06SE19A-2  | 1732 | 3770  | 4.6  | 18.5978 | 12.5 | 0.1128 | 13.6 | 0.0152 | 5.3  | 0.39 | 97.4  | 5.1  | 108.6 | 14.0 | 361.4  | 282.4 |
| 06SE19A-3  | 3496 | 4912  | 23.4 | 19.6431 | 4.7  | 0.1096 | 5.4  | 0.0156 | 2.8  | 0.51 | 99.8  | 2.7  | 105.6 | 5.5  | 236.7  | 108.3 |
| 06SE19A-4  | 614  | 6586  | 23.6 | 18.8575 | 38.6 | 0.1145 | 39.1 | 0.0157 | 6.6  | 0.17 | 100.2 | 6.5  | 110.1 | 40.9 | 330.0  | 906.3 |
| 06SE19A-5  | 1613 | 18852 | 3.6  | 19.4661 | 6.9  | 0.1152 | 8.4  | 0.0163 | 4.8  | 0.57 | 104.0 | 4.9  | 110.7 | 8.8  | 257.5  | 159.3 |
| 06SE19A-6  | 949  | 7410  | 2.4  | 21.4205 | 6.8  | 0.0956 | 7.2  | 0.0149 | 2.4  | 0.33 | 95.0  | 2.3  | 92.7  | 6.4  | 33.1   | 163.4 |
| 06SE19A-7  | 4315 | 11778 | 1.0  | 20.1620 | 3.8  | 0.0899 | 10.1 | 0.0131 | 9.4  | 0.93 | 84.2  | 7.9  | 87.4  | 8.5  | 176.2  | 87.9  |
| 06SE19A-8  | 2552 | 17396 | 1.0  | 21.0409 | 5.6  | 0.0837 | 10.8 | 0.0128 | 9.3  | 0.86 | 81.8  | 7.6  | 81.6  | 8.5  | 75.7   | 132.8 |
| 06SE19A-9  | 3376 | 22355 | 0.9  | 21.0788 | 5.8  | 0.0896 | 6.9  | 0.0137 | 3.7  | 0.54 | 87.7  | 3.3  | 87.2  | 5.7  | 71.5   | 137.1 |
| 06SE19A-10 | 542  | 10275 | 2.9  | 21.4603 | 16.0 | 0.0954 | 16.6 | 0.0148 | 4.5  | 0.27 | 95.0  | 4.3  | 92.5  | 14.7 | 28.6   | 384.6 |
| 06SE19A-11 | 2503 | 10893 | 0.8  | 21.9915 | 10.1 | 0.0849 | 13.3 | 0.0135 | 8.7  | 0.66 | 86.7  | 7.5  | 82.7  | 10.6 | -30.3  | 244.6 |
| 06SE19A-12 | 3338 | 31694 | 22.4 | 20.2957 | 2.2  | 0.0999 | 3.6  | 0.0147 | 2.9  | 0.79 | 94.1  | 2.7  | 96.7  | 3.3  | 160.8  | 51.5  |
| 06SE19A-14 | 4093 | 37315 | 55.8 | 20.8923 | 2.2  | 0.0951 | 3.1  | 0.0144 | 2.2  | 0.69 | 92.3  | 2.0  | 92.3  | 2.7  | 92.6   | 53.3  |
| 06SE19A-16 | 2563 | 22789 | 8.5  | 21.4121 | 3.0  | 0.0930 | 4.8  | 0.0144 | 3.7  | 0.77 | 92.5  | 3.4  | 90.3  | 4.1  | 34.0   | 72.8  |
| 06SE19A-17 | 487  | 3568  | 7.6  | 21.6995 | 19.0 | 0.0803 | 24.6 | 0.0126 | 15.6 | 0.64 | 80.9  | 12.6 | 78.4  | 18.5 | 2.0    | 460.3 |
| 06SE19A-18 | 4329 | 20721 | 0.8  | 20.1539 | 4.3  | 0.0877 | 8.7  | 0.0128 | 7.6  | 0.87 | 82.1  | 6.2  | 85.4  | 7.2  | 177.1  | 100.4 |
| 06SE19A-20 | 553  | 3220  | 2.1  | 27.5170 | 19.4 | 0.0715 | 19.9 | 0.0143 | 4.4  | 0.22 | 91.4  | 4.0  | 70.2  | 13.5 | -605.2 | 533.1 |
| 06SE19A-21 | 4646 | 12364 | 0.7  | 20.4563 | 2.4  | 0.0893 | 7.6  | 0.0132 | 7.2  | 0.95 | 84.8  | 6.1  | 86.8  | 6.3  | 142.3  | 55.4  |
| 06SE19A-23 | 2273 | 22443 | 3.2  | 19.6163 | 3.2  | 0.1166 | 3.6  | 0.0166 | 1.5  | 0.42 | 106.1 | 1.6  | 112.0 | 3.8  | 239.8  | 74.7  |
| 06SE19A-24 | 1646 | 20440 | 1.3  | 20.7246 | 6.7  | 0.0944 | 7.3  | 0.0142 | 2.8  | 0.39 | 90.9  | 2.6  | 91.6  | 6.4  | 111.6  | 158.7 |
| 06SE19A-25 | 2814 | 16256 | 1.5  | 19.7632 | 5.9  | 0.0995 | 6.8  | 0.0143 | 3.3  | 0.48 | 91.3  | 3.0  | 96.3  | 6.2  | 222.6  | 137.7 |
| 06SE19A-27 | 1362 | 16978 | 9.2  | 20.9951 | 9.8  | 0.0908 | 12.4 | 0.0138 | 7.5  | 0.61 | 88.5  | 6.6  | 88.2  | 10.4 | 80.9   | 232.9 |
| 06SE19A-29 | 3355 | 23358 | 0.8  | 20.9205 | 5.4  | 0.0882 | 6.6  | 0.0134 | 3.9  | 0.59 | 85.7  | 3.3  | 85.8  | 5.5  | 89.4   | 127.1 |

## Sample 08SE256

## Lebec granodiorite

|        |      |      |      |         |      |        |      |        |     |      |       |     |       |      |        |        |
|--------|------|------|------|---------|------|--------|------|--------|-----|------|-------|-----|-------|------|--------|--------|
| 262-1  | 1148 | 5349 | 4.5  | 19.1187 | 19.1 | 0.1029 | 19.1 | 0.0143 | 1.0 | 0.05 | 91.4  | 0.9 | 99.5  | 18.1 | 298.7  | 439.5  |
| 262-2  | 1069 | 3864 | 4.7  | 18.1144 | 7.7  | 0.1038 | 7.7  | 0.0136 | 0.5 | 0.07 | 87.3  | 0.4 | 100.2 | 7.4  | 420.5  | 172.3  |
| 262-3  | 750  | 8736 | 15.9 | 20.4906 | 5.9  | 0.0948 | 6.1  | 0.0141 | 1.7 | 0.27 | 90.2  | 1.5 | 92.0  | 5.4  | 138.3  | 139.0  |
| 262-4  | 142  | 2235 | 4.3  | 24.3979 | 20.3 | 0.0747 | 20.8 | 0.0132 | 4.6 | 0.22 | 84.7  | 3.8 | 73.2  | 14.7 | -288.4 | 521.8  |
| 262-5  | 207  | 2589 | 4.5  | 22.2951 | 17.7 | 0.0845 | 18.1 | 0.0137 | 3.6 | 0.20 | 87.5  | 3.2 | 82.4  | 14.3 | -63.6  | 435.2  |
| 262-6  | 80   | 1134 | 4.6  | 23.3179 | 19.6 | 0.0815 | 19.7 | 0.0138 | 2.7 | 0.14 | 88.2  | 2.4 | 79.5  | 15.1 | -174.3 | 491.4  |
| 262-7  | 500  | 1629 | 9.6  | 10.6396 | 50.6 | 0.1872 | 50.8 | 0.0144 | 3.9 | 0.08 | 92.5  | 3.6 | 174.2 | 81.5 | 1507.9 | 1028.9 |
| 262-8  | 1311 | 2223 | 8.3  | 15.4268 | 12.8 | 0.1225 | 13.0 | 0.0137 | 2.6 | 0.20 | 87.8  | 2.2 | 117.3 | 14.4 | 768.6  | 270.2  |
| 262-9  | 264  | 2520 | 2.8  | 19.4399 | 16.8 | 0.1120 | 16.9 | 0.0158 | 1.7 | 0.10 | 101.0 | 1.7 | 107.8 | 17.3 | 260.6  | 389.2  |
| 262-10 | 196  | 669  | 3.1  | 10.5735 | 14.1 | 0.2091 | 14.2 | 0.0160 | 1.1 | 0.08 | 102.5 | 1.1 | 192.8 | 24.9 | 1519.6 | 268.1  |
| 262-11 | 919  | 9663 | 33.8 | 18.4550 | 5.9  | 0.1065 | 6.1  | 0.0143 | 1.4 | 0.24 | 91.3  | 1.3 | 102.8 | 5.9  | 378.8  | 133.0  |
| 262-12 | 359  | 3633 | 3.3  | 21.4019 | 7.9  | 0.0914 | 8.2  | 0.0142 | 2.2 | 0.27 | 90.8  | 2.0 | 88.8  | 7.0  | 35.2   | 190.1  |
| 262-13 | 390  | 4530 | 3.6  | 21.5755 | 12.1 | 0.0888 | 12.2 | 0.0139 | 1.7 | 0.14 | 88.9  | 1.5 | 86.4  | 10.1 | 15.8   | 291.5  |
| 262-14 | 448  | 5295 | 7.3  | 21.0425 | 6.9  | 0.0887 | 7.4  | 0.0135 | 2.7 | 0.37 | 86.6  | 2.3 | 86.3  | 6.1  | 75.6   | 163.1  |
| 262-16 | 944  | 4041 | 6.9  | 14.2673 | 35.5 | 0.1223 | 36.5 | 0.0127 | 8.3 | 0.23 | 81.0  | 6.7 | 117.1 | 40.4 | 931.0  | 752.5  |

Table SD1 (Continued).

| Analysis                                                  | U<br>(ppm) | <sup>206</sup> Pb<br><sup>204</sup> Pb | U/Th | Isotope ratios     |      |                    |      |                    |     |             | Isotopic ages (Ma) <sup>§</sup> |      |                    |      |                    |        |
|-----------------------------------------------------------|------------|----------------------------------------|------|--------------------|------|--------------------|------|--------------------|-----|-------------|---------------------------------|------|--------------------|------|--------------------|--------|
|                                                           |            |                                        |      | <sup>206</sup> Pb* | ±    | <sup>207</sup> Pb* | ±    | <sup>206</sup> Pb* | ±   | Error       | <sup>206</sup> Pb*              | ±    | <sup>207</sup> Pb* | ±    | <sup>206</sup> Pb* | ±      |
|                                                           |            |                                        |      | <sup>207</sup> Pb* | (%)  | <sup>235</sup> U*  | (%)  | <sup>238</sup> U   | (%) | correlation | <sup>238</sup> U                | (Ma) | <sup>235</sup> U*  | (Ma) | <sup>207</sup> Pb* | (Ma)   |
| 262-18                                                    | 303        | 4734                                   | 6.3  | 19.5762            | 9.6  | 0.1066             | 11.5 | 0.0151             | 6.4 | 0.56        | 96.8                            | 6.2  | 102.8              | 11.3 | 244.5              | 221.2  |
| 262-20                                                    | 796        | 2376                                   | 4.8  | 13.9943            | 32.3 | 0.1276             | 32.4 | 0.0130             | 2.4 | 0.08        | 83.0                            | 2.0  | 122.0              | 37.2 | 970.5              | 675.3  |
| <i>Sample 10TC5 Granodiorite of Gato Montes</i>           |            |                                        |      |                    |      |                    |      |                    |     |             |                                 |      |                    |      |                    |        |
| 10TC5 - 1                                                 | 494        | 8864                                   | 4.3  | 20.2580            | 12.7 | 0.0957             | 13.6 | 0.0141             | 4.8 | 0.36        | 90.0                            | 4.3  | 92.8               | 12.1 | 165.1              | 298.7  |
| 10TC5 - 2                                                 | 356        | 5144                                   | 4.1  | 18.9727            | 22.7 | 0.1013             | 23.1 | 0.0139             | 4.4 | 0.19        | 89.2                            | 3.9  | 98.0               | 21.6 | 316.2              | 521.4  |
| 10TC5 - 3                                                 | 942        | 13731                                  | 2.5  | 19.7740            | 5.0  | 0.1114             | 6.0  | 0.0160             | 3.3 | 0.55        | 102.2                           | 3.4  | 107.2              | 6.1  | 221.3              | 116.6  |
| 10TC5 - 4                                                 | 659        | 15855                                  | 2.4  | 20.4759            | 11.9 | 0.0956             | 12.2 | 0.0142             | 2.7 | 0.22        | 90.9                            | 2.4  | 92.7               | 10.8 | 140.1              | 281.4  |
| 10TC5 - 5                                                 | 325        | 4519                                   | 4.4  | 19.1695            | 22.5 | 0.1021             | 22.6 | 0.0142             | 2.6 | 0.11        | 90.8                            | 2.3  | 98.7               | 21.3 | 292.7              | 519.1  |
| 10TC5 - 6                                                 | 998        | 21164                                  | 4.9  | 21.4015            | 8.3  | 0.0937             | 9.5  | 0.0145             | 4.7 | 0.49        | 93.0                            | 4.3  | 90.9               | 8.3  | 35.2               | 199.8  |
| 10TC5 - 7                                                 | 596        | 9226                                   | 4.0  | 22.3742            | 19.1 | 0.0991             | 19.3 | 0.0161             | 2.6 | 0.13        | 102.8                           | 2.6  | 95.9               | 17.7 | -72.3              | 471.6  |
| 10TC5 - 8                                                 | 1332       | 16944                                  | 6.3  | 21.7055            | 5.6  | 0.0884             | 5.8  | 0.0139             | 1.6 | 0.28        | 89.1                            | 1.4  | 86.0               | 4.8  | 1.4                | 134.6  |
| 10TC5 - 9                                                 | 230        | 4529                                   | 3.5  | 22.2354            | 50.6 | 0.0928             | 51.2 | 0.0150             | 7.7 | 0.15        | 95.7                            | 7.3  | 90.1               | 44.1 | -57.1              | 1310.3 |
| 10TC5 - 10                                                | 264        | 8289                                   | 2.2  | 19.3624            | 32.0 | 0.1057             | 32.9 | 0.0148             | 7.7 | 0.23        | 95.0                            | 7.2  | 102.1              | 32.0 | 269.8              | 751.0  |
| 10TC5 - 11                                                | 580        | 9175                                   | 2.8  | 20.0433            | 10.9 | 0.1037             | 11.7 | 0.0151             | 4.3 | 0.37        | 96.5                            | 4.1  | 100.2              | 11.2 | 190.0              | 253.7  |
| 10TC5 - 12                                                | 504        | 29535                                  | 3.1  | 19.5840            | 15.1 | 0.1005             | 15.5 | 0.0143             | 3.7 | 0.24        | 91.4                            | 3.4  | 97.2               | 14.4 | 243.7              | 349.0  |
| 10TC5 - 13                                                | 356        | 10339                                  | 3.2  | 17.8675            | 16.9 | 0.1128             | 17.9 | 0.0146             | 6.0 | 0.33        | 93.6                            | 5.5  | 108.6              | 18.5 | 451.1              | 378.3  |
| 10TC5 - 14                                                | 690        | 13478                                  | 5.0  | 21.1244            | 16.0 | 0.0931             | 16.4 | 0.0143             | 3.5 | 0.22        | 91.3                            | 3.2  | 90.4               | 14.2 | 66.4               | 382.5  |
| 10TC5 - 15                                                | 497        | 9741                                   | 3.8  | 21.6530            | 16.8 | 0.1046             | 17.1 | 0.0164             | 3.1 | 0.18        | 105.1                           | 3.2  | 101.1              | 16.4 | 7.2                | 406.1  |
| 10TC5 - 16                                                | 708        | 10167                                  | 5.3  | 19.8258            | 10.7 | 0.1020             | 11.0 | 0.0147             | 2.7 | 0.24        | 93.9                            | 2.5  | 98.6               | 10.3 | 215.3              | 247.5  |
| 10TC5 - 17                                                | 300        | 7308                                   | 7.1  | 21.0040            | 27.3 | 0.0945             | 28.1 | 0.0144             | 6.7 | 0.24        | 92.2                            | 6.1  | 91.7               | 24.7 | 79.9               | 659.6  |
| 10TC5 - 19                                                | 772        | 20618                                  | 5.1  | 20.3102            | 7.0  | 0.1369             | 9.9  | 0.0202             | 7.0 | 0.70        | 128.7                           | 8.9  | 130.3              | 12.1 | 159.1              | 165.0  |
| 10TC5 - 20                                                | 743        | 16679                                  | 5.6  | 19.7926            | 6.3  | 0.1017             | 7.3  | 0.0146             | 3.8 | 0.51        | 93.5                            | 3.5  | 98.4               | 6.9  | 219.2              | 145.8  |
| 10TC5 - 21                                                | 1043       | 43381                                  | 4.6  | 21.4687            | 9.4  | 0.0905             | 10.1 | 0.0141             | 3.7 | 0.37        | 90.2                            | 3.3  | 88.0               | 8.5  | 27.7               | 224.8  |
| 10TC5 - 22                                                | 247        | 7747                                   | 3.6  | 24.5444            | 20.6 | 0.0866             | 21.8 | 0.0154             | 7.2 | 0.33        | 98.6                            | 7.1  | 84.3               | 17.6 | -303.7             | 530.5  |
| 10TC5 - 23                                                | 505        | 8159                                   | 3.2  | 21.4982            | 18.9 | 0.0928             | 20.0 | 0.0145             | 6.8 | 0.34        | 92.6                            | 6.2  | 90.1               | 17.3 | 24.4               | 456.2  |
| 10TC5 - 24                                                | 568        | 4927                                   | 2.6  | 18.6067            | 11.7 | 0.1068             | 12.6 | 0.0144             | 4.5 | 0.36        | 92.2                            | 4.1  | 103.0              | 12.3 | 360.3              | 265.1  |
| 10TC5 - 25                                                | 798        | 35726                                  | 4.2  | 21.0033            | 6.8  | 0.1068             | 7.3  | 0.0163             | 2.7 | 0.37        | 104.1                           | 2.8  | 103.1              | 7.2  | 80.0               | 161.4  |
| 10TC5 - 26                                                | 361        | 5206                                   | 3.1  | 20.2837            | 16.1 | 0.1013             | 16.4 | 0.0149             | 2.8 | 0.17        | 95.4                            | 2.7  | 98.0               | 15.3 | 162.2              | 379.4  |
| 10TC5 - 27                                                | 372        | 5828                                   | 3.0  | 25.9300            | 17.8 | 0.0800             | 18.3 | 0.0150             | 4.0 | 0.22        | 96.2                            | 3.8  | 78.1               | 13.7 | -446.2             | 472.0  |
| 10TC5 - 28                                                | 589        | 12649                                  | 3.7  | 21.4163            | 10.3 | 0.0922             | 11.1 | 0.0143             | 4.2 | 0.38        | 91.6                            | 3.8  | 89.5               | 9.5  | 33.6               | 246.8  |
| 10TC5 - 29                                                | 660        | 20385                                  | 3.1  | 21.7576            | 15.5 | 0.0909             | 16.2 | 0.0144             | 4.7 | 0.29        | 91.9                            | 4.3  | 88.4               | 13.7 | -4.4               | 376.5  |
| 10TC5 - 30                                                | 204        | 2988                                   | 4.4  | 24.1013            | 62.5 | 0.0809             | 63.0 | 0.0141             | 8.4 | 0.13        | 90.5                            | 7.5  | 79.0               | 47.9 | -257.3             | 1745.9 |
| 10TC5 - 31                                                | 688        | 12062                                  | 4.0  | 20.8266            | 10.0 | 0.1089             | 10.1 | 0.0164             | 1.5 | 0.15        | 105.1                           | 1.6  | 104.9              | 10.1 | 100.0              | 237.6  |
| 10TC5 - 33                                                | 793        | 30531                                  | 3.7  | 19.6470            | 11.7 | 0.1061             | 12.0 | 0.0151             | 2.6 | 0.21        | 96.7                            | 2.5  | 102.4              | 11.7 | 236.2              | 270.8  |
| 10TC5 - 34                                                | 369        | 9179                                   | 2.4  | 24.7933            | 19.6 | 0.0826             | 20.6 | 0.0149             | 6.3 | 0.31        | 95.1                            | 6.0  | 80.6               | 16.0 | -329.5             | 508.4  |
| 10TC5 - 35                                                | 262        | 11422                                  | 2.8  | 27.2677            | 48.6 | 0.0726             | 48.8 | 0.0144             | 4.7 | 0.10        | 92.0                            | 4.3  | 71.2               | 33.6 | -580.5             | 1384.7 |
| <i>Sample 08TC27 Granodiorite of Gamble Spring Canyon</i> |            |                                        |      |                    |      |                    |      |                    |     |             |                                 |      |                    |      |                    |        |
| TC27-21                                                   | 223        | 5619                                   | 0.6  | 21.1522            | 7.5  | 0.1483             | 7.6  | 0.0228             | 1.6 | 0.21        | 145.1                           | 2.3  | 140.4              | 10.0 | 63.2               | 178.2  |
| TC27-22                                                   | 290        | 8744                                   | 0.8  | 21.4644            | 5.1  | 0.1476             | 5.3  | 0.0230             | 1.5 | 0.28        | 146.4                           | 2.1  | 139.7              | 6.9  | 28.2               | 122.6  |
| TC27-24                                                   | 146        | 5007                                   | 0.8  | 20.4894            | 8.2  | 0.1557             | 8.3  | 0.0231             | 1.5 | 0.18        | 147.5                           | 2.2  | 147.0              | 11.4 | 138.5              | 192.8  |
| TC27-25                                                   | 168        | 12780                                  | 0.7  | 20.7719            | 7.6  | 0.1532             | 7.8  | 0.0231             | 1.4 | 0.18        | 147.1                           | 2.0  | 144.7              | 10.5 | 106.2              | 180.9  |
| TC27-1                                                    | 236        | 8056                                   | 0.5  | 21.6358            | 4.9  | 0.1463             | 4.9  | 0.0230             | 0.4 | 0.08        | 146.4                           | 0.6  | 138.7              | 6.4  | 9.1                | 117.8  |
| TC27-2                                                    | 194        | 8923                                   | 0.6  | 20.4878            | 13.9 | 0.1554             | 14.2 | 0.0231             | 3.1 | 0.22        | 147.2                           | 4.6  | 146.7              | 19.4 | 138.7              | 327.1  |
| TC27-26                                                   | 140        | 6463                                   | 0.7  | 23.1799            | 10.2 | 0.1370             | 10.5 | 0.0230             | 2.7 | 0.26        | 146.8                           | 3.9  | 130.4              | 12.9 | -159.5             | 253.5  |
| TC27-3                                                    | 161        | 5936                                   | 0.7  | 20.9946            | 11.3 | 0.1502             | 11.5 | 0.0229             | 1.9 | 0.17        | 145.8                           | 2.8  | 142.1              | 15.2 | 81.0               | 269.6  |
| TC27-27                                                   | 196        | 4362                                   | 0.6  | 21.7356            | 10.1 | 0.1467             | 10.1 | 0.0231             | 0.8 | 0.08        | 147.4                           | 1.2  | 139.0              | 13.1 | -2.0               | 243.1  |
| TC27-4                                                    | 97         | 4365                                   | 0.9  | 19.8627            | 17.0 | 0.1636             | 17.0 | 0.0236             | 1.5 | 0.09        | 150.2                           | 2.2  | 153.8              | 24.3 | 211.0              | 395.9  |
| TC27-5                                                    | 180        | 3901                                   | 1.0  | 22.6203            | 15.7 | 0.1406             | 15.8 | 0.0231             | 1.9 | 0.12        | 147.0                           | 2.8  | 133.6              | 19.8 | -99.1              | 387.9  |
| TC27-29                                                   | 165        | 8116                                   | 0.8  | 21.3644            | 13.0 | 0.1484             | 13.2 | 0.0230             | 2.1 | 0.16        | 146.6                           | 3.0  | 140.5              | 17.3 | 39.4               | 312.2  |
| TC27-30                                                   | 153        | 7988                                   | 0.8  | 21.6583            | 9.1  | 0.1474             | 9.3  | 0.0231             | 1.8 | 0.20        | 147.5                           | 2.7  | 139.6              | 12.1 | 6.6                | 219.1  |
| TC27-6                                                    | 122        | 4305                                   | 1.0  | 18.8836            | 11.1 | 0.1711             | 11.8 | 0.0234             | 3.9 | 0.33        | 149.3                           | 5.8  | 160.4              | 17.5 | 326.9              | 252.3  |
| TC27-7                                                    | 154        | 5207                                   | 0.9  | 21.0979            | 10.4 | 0.1515             | 10.4 | 0.0232             | 1.2 | 0.11        | 147.7                           | 1.7  | 143.2              | 13.9 | 69.4               | 247.3  |
| TC27                                                      | 213        | 11762                                  | 1.1  | 22.4109            | 9.5  | 0.1378             | 9.6  | 0.0224             | 1.7 | 0.17        | 142.8                           | 2.3  | 131.1              | 11.8 | -76.3              | 231.8  |
| TC27-8                                                    | 134        | 6476                                   | 0.7  | 22.5889            | 13.5 | 0.1411             | 13.6 | 0.0231             | 1.5 | 0.11        | 147.3                           | 2.2  | 134.0              | 17.1 | -95.7              | 333.6  |
| TC27-32                                                   | 126        | 5633                                   | 0.9  | 23.8383            | 24.7 | 0.1337             | 24.9 | 0.0231             | 3.1 | 0.12        | 147.3                           | 4.5  | 127.4              | 29.8 | -229.6             | 629.6  |
| TC27-9                                                    | 395        | 9825                                   | 1.1  | 21.3037            | 6.2  | 0.1490             | 7.1  | 0.0230             | 3.5 | 0.49        | 146.7                           | 5.0  | 141.0              | 9.3  | 46.2               | 147.6  |

Table SD1 (Continued).

| Analysis       | U<br>(ppm) | <sup>206</sup> Pb<br><sup>204</sup> Pb | U/Th | Isotope ratios     |       |                    |       |                    |     |             | Isotopic ages (Ma) <sup>§</sup> |      |                    |       |                    |        |
|----------------|------------|----------------------------------------|------|--------------------|-------|--------------------|-------|--------------------|-----|-------------|---------------------------------|------|--------------------|-------|--------------------|--------|
|                |            |                                        |      | <sup>206</sup> Pb* | ±     | <sup>207</sup> Pb* | ±     | <sup>206</sup> Pb* | ±   | Error       | <sup>206</sup> Pb*              | ±    | <sup>207</sup> Pb* | ±     | <sup>206</sup> Pb* | ±      |
|                |            |                                        |      | <sup>207</sup> Pb* | (%)   | <sup>235</sup> U*  | (%)   | <sup>238</sup> U   | (%) | correlation | <sup>238</sup> U                | (Ma) | <sup>235</sup> U*  | (Ma)  | <sup>207</sup> Pb* | (Ma)   |
| TC27-33        | 192        | 8374                                   | 0.8  | 22.9020            | 10.3  | 0.1372             | 10.5  | 0.0228             | 2.2 | 0.21        | 145.2                           | 3.2  | 130.5              | 12.9  | -129.6             | 254.8  |
| TC27-10        | 211        | 51988                                  | 0.8  | 20.5493            | 7.4   | 0.1550             | 7.6   | 0.0231             | 1.8 | 0.24        | 147.3                           | 2.7  | 146.4              | 10.4  | 131.6              | 174.1  |
| TC27-35        | 541        | 26095                                  | 1.1  | 20.6820            | 3.7   | 0.1512             | 4.3   | 0.0227             | 2.3 | 0.52        | 144.6                           | 3.2  | 143.0              | 5.8   | 116.5              | 87.4   |
| TC27-11        | 91         | 3382                                   | 1.3  | 24.6979            | 23.1  | 0.1351             | 23.2  | 0.0242             | 1.8 | 0.08        | 154.2                           | 2.8  | 128.7              | 28.1  | -319.6             | 600.3  |
| TC27-12        | 192        | 13783                                  | 0.8  | 18.6298            | 8.9   | 0.1727             | 9.1   | 0.0233             | 1.9 | 0.21        | 148.7                           | 2.8  | 161.8              | 13.6  | 357.5              | 200.9  |
| TC27-13        | 295        | 13249                                  | 0.6  | 20.7132            | 6.5   | 0.1541             | 6.7   | 0.0232             | 1.7 | 0.25        | 147.5                           | 2.5  | 145.5              | 9.1   | 112.9              | 153.3  |
| TC27-14        | 209        | 7064                                   | 0.9  | 22.9552            | 8.1   | 0.1387             | 8.4   | 0.0231             | 2.1 | 0.25        | 147.2                           | 3.0  | 131.9              | 10.4  | -135.3             | 200.8  |
| TC27-15        | 168        | 9095                                   | 1.2  | 21.1309            | 10.6  | 0.1497             | 10.8  | 0.0229             | 1.9 | 0.17        | 146.2                           | 2.7  | 141.6              | 14.2  | 65.6               | 253.1  |
| TC27-16        | 145        | 6532                                   | 0.7  | 20.6545            | 14.8  | 0.1530             | 15.0  | 0.0229             | 2.4 | 0.16        | 146.1                           | 3.4  | 144.5              | 20.2  | 119.6              | 350.6  |
| TC27-17        | 147        | 3997                                   | 0.8  | 20.9306            | 7.8   | 0.1525             | 8.3   | 0.0231             | 2.7 | 0.33        | 147.5                           | 4.0  | 144.1              | 11.1  | 88.3               | 185.1  |
| TC27-18        | 200        | 9877                                   | 0.5  | 20.3768            | 7.5   | 0.1543             | 7.7   | 0.0228             | 1.8 | 0.23        | 145.3                           | 2.6  | 145.7              | 10.5  | 151.4              | 176.3  |
| TC27-19        | 192        | 8388                                   | 0.7  | 20.5194            | 8.6   | 0.1549             | 8.8   | 0.0230             | 1.7 | 0.19        | 146.9                           | 2.4  | 146.2              | 12.0  | 135.1              | 202.8  |
| TC27-20        | 218        | 6825                                   | 0.6  | 21.0080            | 9.6   | 0.1540             | 9.8   | 0.0235             | 2.3 | 0.23        | 149.5                           | 3.4  | 145.5              | 13.3  | 79.5               | 227.2  |
|                |            |                                        |      |                    |       |                    |       |                    |     |             |                                 |      |                    |       |                    |        |
| Sample 08SE596 |            | Granite of Brush Mountain              |      |                    |       |                    |       |                    |     |             |                                 |      |                    |       |                    |        |
| 08SE596-2      | 1379       | 7336                                   | 3.2  | 20.8858            | 3.7   | 0.1063             | 4.1   | 0.0161             | 1.7 | 0.42        | 102.9                           | 1.8  | 102.5              | 4.0   | 93.3               | 88.3   |
| 08SE596-4      | 2122       | 4306                                   | 3.5  | 19.7845            | 9.3   | 0.1145             | 9.3   | 0.0164             | 1.0 | 0.11        | 105.1                           | 1.1  | 110.1              | 9.7   | 220.1              | 214.7  |
| 08SE596-5      | 1975       | 13880                                  | 3.1  | 21.1179            | 3.9   | 0.1064             | 4.2   | 0.0163             | 1.4 | 0.34        | 104.2                           | 1.5  | 102.6              | 4.1   | 67.1               | 92.9   |
| 08SE596-6      | 2927       | 8412                                   | 2.4  | 20.6572            | 1.3   | 0.1092             | 2.6   | 0.0164             | 2.2 | 0.85        | 104.6                           | 2.3  | 105.2              | 2.6   | 119.3              | 31.3   |
| 08SE596-7      | 2347       | 21315                                  | 3.3  | 20.2799            | 2.4   | 0.1119             | 2.9   | 0.0165             | 1.5 | 0.52        | 105.3                           | 1.5  | 107.7              | 2.9   | 162.6              | 57.2   |
| 08SE596-8      | 3141       | 3816                                   | 4.7  | 20.4414            | 3.1   | 0.0968             | 4.5   | 0.0144             | 3.3 | 0.73        | 91.9                            | 3.0  | 93.9               | 4.0   | 144.0              | 71.8   |
| 08SE596-10     | 2421       | 15355                                  | 3.6  | 20.8217            | 2.4   | 0.1102             | 3.3   | 0.0166             | 2.3 | 0.70        | 106.4                           | 2.4  | 106.1              | 3.3   | 100.6              | 55.7   |
| 08SE596-11     | 2716       | 21020                                  | 2.7  | 20.7742            | 1.3   | 0.1103             | 2.5   | 0.0166             | 2.2 | 0.86        | 106.2                           | 2.3  | 106.2              | 2.6   | 106.0              | 30.5   |
| 08SE596-12     | 2071       | 14682                                  | 3.6  | 21.1875            | 1.7   | 0.1082             | 3.3   | 0.0166             | 2.8 | 0.85        | 106.3                           | 2.9  | 104.3              | 3.2   | 59.3               | 40.7   |
| 08SE596-13     | 3106       | 21442                                  | 2.0  | 20.7543            | 1.4   | 0.1095             | 2.8   | 0.0165             | 2.4 | 0.86        | 105.4                           | 2.5  | 105.5              | 2.8   | 108.3              | 32.8   |
| 08SE596-14     | 3020       | 26304                                  | 2.2  | 20.8257            | 1.7   | 0.1078             | 3.0   | 0.0163             | 2.4 | 0.83        | 104.2                           | 2.5  | 104.0              | 2.9   | 100.1              | 39.4   |
| 08SE596-15     | 1874       | 12544                                  | 3.7  | 21.1609            | 2.7   | 0.1073             | 3.3   | 0.0165             | 1.9 | 0.58        | 105.3                           | 2.0  | 103.5              | 3.3   | 62.2               | 64.2   |
| 08SE596-16     | 2744       | 16169                                  | 4.1  | 20.8995            | 1.9   | 0.1057             | 2.4   | 0.0160             | 1.5 | 0.63        | 102.4                           | 1.6  | 102.0              | 2.4   | 91.7               | 44.5   |
| 08SE596-17     | 1027       | 7072                                   | 1.9  | 20.9206            | 4.7   | 0.1033             | 5.1   | 0.0157             | 2.1 | 0.40        | 100.3                           | 2.0  | 99.8               | 4.9   | 89.4               | 111.5  |
| 08SE596-18     | 2079       | 17591                                  | 4.3  | 20.8740            | 1.1   | 0.1050             | 1.6   | 0.0159             | 1.2 | 0.75        | 101.7                           | 1.2  | 101.4              | 1.5   | 94.7               | 25.1   |
| 08SE596-19     | 1062       | 3591                                   | 5.2  | 20.7320            | 5.8   | 0.1082             | 6.1   | 0.0163             | 1.8 | 0.30        | 104.1                           | 1.9  | 104.3              | 6.1   | 110.8              | 138.1  |
| 08SE596-20     | 2772       | 12962                                  | 3.6  | 20.5065            | 3.0   | 0.1132             | 4.3   | 0.0168             | 3.1 | 0.73        | 107.6                           | 3.4  | 108.8              | 4.5   | 136.5              | 69.3   |
| 08SE596-21     | 2794       | 30352                                  | 2.5  | 20.9028            | 1.4   | 0.1058             | 2.5   | 0.0160             | 2.0 | 0.82        | 102.6                           | 2.0  | 102.1              | 2.4   | 91.4               | 33.6   |
| 08SE596-23     | 2611       | 25116                                  | 2.7  | 20.7919            | 1.8   | 0.1101             | 3.1   | 0.0166             | 2.6 | 0.83        | 106.1                           | 2.7  | 106.0              | 3.1   | 104.0              | 41.6   |
| 08SE596-24     | 2364       | 6884                                   | 4.5  | 19.6825            | 8.3   | 0.1194             | 8.4   | 0.0170             | 1.3 | 0.15        | 108.9                           | 1.4  | 114.5              | 9.1   | 232.0              | 192.0  |
| 08SE596-25     | 1934       | 21386                                  | 2.3  | 20.9220            | 2.0   | 0.1117             | 3.8   | 0.0170             | 3.2 | 0.84        | 108.4                           | 3.5  | 107.5              | 3.9   | 89.2               | 48.4   |
| 08SE596-26     | 2241       | 26230                                  | 4.0  | 20.9492            | 2.3   | 0.1096             | 3.0   | 0.0167             | 2.0 | 0.65        | 106.5                           | 2.1  | 105.6              | 3.0   | 86.2               | 53.7   |
| 08SE596-27     | 2401       | 16035                                  | 4.1  | 20.5753            | 1.9   | 0.1087             | 3.4   | 0.0162             | 2.9 | 0.83        | 103.7                           | 2.9  | 104.8              | 3.4   | 128.7              | 44.5   |
| 08SE596-28     | 2937       | 28028                                  | 2.0  | 20.7247            | 2.3   | 0.1092             | 3.3   | 0.0164             | 2.3 | 0.71        | 105.0                           | 2.4  | 105.3              | 3.3   | 111.6              | 55.1   |
| 08SE596-29     | 2282       | 23995                                  | 2.7  | 20.6023            | 3.0   | 0.1131             | 3.7   | 0.0169             | 2.1 | 0.56        | 108.0                           | 2.2  | 108.8              | 3.8   | 125.6              | 71.7   |
| 08SE596-30     | 2220       | 10233                                  | 3.2  | 20.6779            | 1.8   | 0.1109             | 3.9   | 0.0166             | 3.5 | 0.89        | 106.3                           | 3.6  | 106.8              | 3.9   | 117.0              | 41.7   |
|                |            |                                        |      |                    |       |                    |       |                    |     |             |                                 |      |                    |       |                    |        |
| Sample 09SE23  |            | White Ridge tonalite                   |      |                    |       |                    |       |                    |     |             |                                 |      |                    |       |                    |        |
| 08SE582-8      | 69         | 1868                                   | 3.9  | 30.9838            | 45.9  | 0.1018             | 45.9  | 0.0229             | 2.4 | 0.05        | 145.8                           | 3.4  | 98.4               | 43.1  | -939.8             | 1402.9 |
| 08SE582-13     | 22         | 367                                    | 7.3  | 19.9023            | 134.1 | 0.1623             | 134.1 | 0.0234             | 3.1 | 0.02        | 149.3                           | 4.6  | 152.7              | 192.4 | 206.4              | 1168.3 |
| 08SE582-14     | 265        | 3788                                   | 2.8  | 23.0986            | 9.8   | 0.1488             | 10.1  | 0.0249             | 2.5 | 0.24        | 158.7                           | 3.8  | 140.9              | 13.3  | -150.7             | 243.8  |
| 08SE582-15     | 26         | 595                                    | 6.4  | 14.6670            | 22.7  | 0.2048             | 23.2  | 0.0218             | 4.8 | 0.21        | 138.9                           | 6.6  | 189.2              | 40.0  | 874.1              | 475.3  |
| 08SE582-19     | 512        | 19809                                  | 4.0  | 20.4443            | 3.9   | 0.1653             | 4.9   | 0.0245             | 3.1 | 0.62        | 156.1                           | 4.7  | 155.3              | 7.1   | 143.7              | 90.6   |
| 08SE582-22     | 40         | 1910                                   | 7.2  | 17.7703            | 101.3 | 0.1886             | 101.3 | 0.0243             | 2.2 | 0.02        | 154.8                           | 3.4  | 175.4              | 164.7 | 463.2              | 690.5  |
| 08SE582-23     | 54         | 2141                                   | 4.8  | 21.0116            | 64.6  | 0.1576             | 64.6  | 0.0240             | 2.7 | 0.04        | 153.0                           | 4.1  | 148.6              | 89.5  | 79.1               | 1714.0 |
| 08SE582-24     | 24         | 855                                    | 7.7  | 30.3099            | 131.4 | 0.1059             | 131.5 | 0.0233             | 3.5 | 0.03        | 148.3                           | 5.2  | 102.2              | 128.5 | -875.9             | 0.0    |
| 08SE582-25     | 29         | 1124                                   | 7.9  | 23.9128            | 76.6  | 0.1310             | 76.9  | 0.0227             | 6.7 | 0.09        | 144.9                           | 9.6  | 125.0              | 90.7  | -237.4             | 2298.5 |
| 08SE582-28     | 69         | 1313                                   | 6.8  | 29.5484            | 40.8  | 0.1041             | 41.3  | 0.0223             | 6.4 | 0.16        | 142.3                           | 9.0  | 100.6              | 39.5  | -803.1             | 1197.9 |
| 08SE582-31     | 265        | 6927                                   | 4.8  | 20.0691            | 11.4  | 0.1703             | 11.8  | 0.0248             | 3.1 | 0.26        | 157.8                           | 4.8  | 159.6              | 17.4  | 186.9              | 265.1  |
| 08SE582-32     | 77         | 2040                                   | 7.0  | 19.4769            | 31.9  | 0.1676             | 31.9  | 0.0237             | 1.3 | 0.04        | 150.8                           | 1.9  | 157.3              | 46.5  | 256.2              | 749.2  |
| 08SE582-33     | 94         | 1169                                   | 6.0  | 25.1342            | 31.1  | 0.1400             | 31.1  | 0.0255             | 1.2 | 0.04        | 162.4                           | 2.0  | 133.0              | 38.8  | -364.8             | 821.4  |
| 08SE582-34     | 71         | 655                                    | 6.5  | 19.8031            | 105.9 | 0.1637             | 106.0 | 0.0235             | 2.8 | 0.03        | 149.8                           | 4.1  | 154.0              | 152.5 | 218.0              | 913.9  |
| 08SE582-35     | 545        | 22997                                  | 2.3  | 20.7238            | 4.8   | 0.1673             | 5.7   | 0.0251             | 3.1 | 0.54        | 160.1                           | 4.8  | 157.1              | 8.2   | 111.7              | 112.4  |

Table SD1 (Continued).

| Analysis                                           | U<br>(ppm) | <sup>206</sup> Pb<br><sup>204</sup> Pb | U/Th | Isotope ratios     |      |                    |      |                    |     |                      | Isotopic ages (Ma) <sup>§</sup> |      |                    |      |                    |       |  |  |
|----------------------------------------------------|------------|----------------------------------------|------|--------------------|------|--------------------|------|--------------------|-----|----------------------|---------------------------------|------|--------------------|------|--------------------|-------|--|--|
|                                                    |            |                                        |      | <sup>206</sup> Pb* | ±    | <sup>207</sup> Pb* | ±    | <sup>206</sup> Pb* | ±   | Error<br>correlation | <sup>206</sup> Pb*              | ±    | <sup>207</sup> Pb* | ±    | <sup>206</sup> Pb* | ±     |  |  |
|                                                    |            |                                        |      | <sup>207</sup> Pb* | (%)  | <sup>235</sup> U*  | (%)  | <sup>238</sup> U   | (%) |                      | <sup>238</sup> U                | (Ma) | <sup>235</sup> U*  | (Ma) | <sup>207</sup> Pb* | (Ma)  |  |  |
| <i>Sample 07TM10      Bean Canyon metavolcanic</i> |            |                                        |      |                    |      |                    |      |                    |     |                      |                                 |      |                    |      |                    |       |  |  |
| 07TM10-2                                           | 289        | 17225                                  | 2.9  | 19.3512            | 2.3  | 0.3105             | 2.8  | 0.0436             | 1.6 | 0.55                 | 274.9                           | 4.2  | 274.5              | 6.8  | 271.1              | 53.9  |  |  |
| 07TM10-3                                           | 144        | 8005                                   | 2.9  | 18.2941            | 27.4 | 0.3221             | 27.5 | 0.0427             | 1.7 | 0.06                 | 269.8                           | 4.4  | 283.5              | 68.0 | 398.4              | 625.0 |  |  |
| 07TM10-4                                           | 517        | 27825                                  | 2.5  | 19.2844            | 1.5  | 0.3136             | 2.4  | 0.0439             | 1.8 | 0.76                 | 276.7                           | 4.8  | 277.0              | 5.7  | 279.0              | 35.1  |  |  |
| 07TM10-5                                           | 270        | 14605                                  | 2.7  | 19.3023            | 2.3  | 0.3191             | 2.9  | 0.0447             | 1.7 | 0.58                 | 281.7                           | 4.6  | 281.2              | 7.1  | 276.9              | 53.6  |  |  |
| 07TM10-6                                           | 276        | 15945                                  | 2.0  | 18.8820            | 2.2  | 0.3143             | 3.1  | 0.0430             | 2.2 | 0.72                 | 271.7                           | 6.0  | 277.5              | 7.6  | 327.1              | 49.2  |  |  |
| 07TM10-7                                           | 337        | 16260                                  | 1.7  | 19.3228            | 2.4  | 0.3004             | 3.3  | 0.0421             | 2.2 | 0.67                 | 265.9                           | 5.8  | 266.8              | 7.7  | 274.5              | 55.9  |  |  |
| 07TM10-8                                           | 711        | 22175                                  | 2.1  | 18.5179            | 2.7  | 0.3407             | 3.1  | 0.0458             | 1.5 | 0.49                 | 288.4                           | 4.3  | 297.7              | 8.1  | 371.1              | 61.2  |  |  |
| 07TM10-9                                           | 960        | 58875                                  | 2.0  | 19.2741            | 3.5  | 0.3104             | 3.7  | 0.0434             | 1.3 | 0.34                 | 273.8                           | 3.4  | 274.5              | 9.0  | 280.2              | 80.6  |  |  |
| 07TM10-10                                          | 241        | 18065                                  | 3.0  | 19.1973            | 2.0  | 0.3142             | 2.3  | 0.0437             | 1.1 | 0.50                 | 276.0                           | 3.1  | 277.4              | 5.5  | 289.4              | 44.7  |  |  |
| 07TM10-11                                          | 651        | 32520                                  | 1.6  | 19.5107            | 1.2  | 0.3075             | 1.9  | 0.0435             | 1.4 | 0.76                 | 274.6                           | 3.8  | 272.3              | 4.5  | 252.2              | 28.3  |  |  |
| 07TM10-13                                          | 332        | 20380                                  | 2.0  | 19.8833            | 2.8  | 0.3044             | 5.0  | 0.0439             | 4.2 | 0.84                 | 276.9                           | 11.5 | 269.8              | 12.0 | 208.6              | 63.9  |  |  |
| 07TM10-14                                          | 210        | 7840                                   | 1.9  | 19.7845            | 3.7  | 0.2917             | 4.6  | 0.0419             | 2.7 | 0.59                 | 264.3                           | 7.0  | 259.9              | 10.5 | 220.1              | 85.2  |  |  |
| 07TM10-15                                          | 430        | 23780                                  | 1.4  | 19.2801            | 1.7  | 0.3099             | 2.1  | 0.0433             | 1.2 | 0.57                 | 273.5                           | 3.2  | 274.1              | 5.0  | 279.5              | 39.2  |  |  |
| 07TM10-16                                          | 700        | 44265                                  | 1.8  | 19.4276            | 1.4  | 0.3033             | 2.8  | 0.0427             | 2.4 | 0.85                 | 269.8                           | 6.3  | 269.0              | 6.6  | 262.1              | 33.1  |  |  |
| 07TM10-17                                          | 295        | 15445                                  | 2.6  | 17.6708            | 9.8  | 0.3476             | 9.9  | 0.0445             | 1.1 | 0.11                 | 281.0                           | 3.1  | 302.9              | 25.9 | 475.6              | 218.1 |  |  |
| 07TM10-18                                          | 366        | 22710                                  | 2.4  | 19.4448            | 2.9  | 0.3031             | 3.1  | 0.0427             | 1.2 | 0.38                 | 269.8                           | 3.1  | 268.8              | 7.4  | 260.0              | 66.4  |  |  |
| 07TM10-19                                          | 469        | 26425                                  | 1.9  | 19.1828            | 2.7  | 0.3148             | 2.8  | 0.0438             | 1.0 | 0.35                 | 276.3                           | 2.7  | 277.9              | 6.9  | 291.1              | 60.7  |  |  |
| 07TM10-20                                          | 413        | 26735                                  | 3.3  | 19.1188            | 2.5  | 0.3076             | 3.6  | 0.0426             | 2.7 | 0.73                 | 269.2                           | 7.0  | 272.3              | 8.6  | 298.7              | 56.0  |  |  |
| 07TM10-21                                          | 323        | 22900                                  | 4.7  | 19.6975            | 2.3  | 0.2895             | 2.7  | 0.0414             | 1.4 | 0.52                 | 261.3                           | 3.6  | 258.2              | 6.2  | 230.3              | 53.6  |  |  |
| 07TM10-22                                          | 217        | 13030                                  | 2.6  | 20.0077            | 1.3  | 0.2882             | 2.0  | 0.0418             | 1.6 | 0.78                 | 264.1                           | 4.1  | 257.1              | 4.6  | 194.1              | 29.7  |  |  |
| 07TM10-24                                          | 158        | 8700                                   | 3.3  | 19.2689            | 3.1  | 0.2978             | 3.7  | 0.0416             | 2.0 | 0.55                 | 262.8                           | 5.3  | 264.6              | 8.6  | 280.9              | 70.6  |  |  |
| 07TM10-25                                          | 677        | 27195                                  | 1.8  | 19.4280            | 5.0  | 0.3043             | 6.0  | 0.0429             | 3.4 | 0.56                 | 270.7                           | 9.0  | 269.8              | 14.3 | 262.0              | 114.4 |  |  |
| 07TM10-26                                          | 956        | 52100                                  | 3.8  | 19.4258            | 1.5  | 0.3053             | 2.2  | 0.0430             | 1.6 | 0.72                 | 271.5                           | 4.2  | 270.5              | 5.2  | 262.3              | 35.1  |  |  |
| 07TM10-27                                          | 405        | 20860                                  | 3.2  | 19.5424            | 2.5  | 0.3097             | 2.7  | 0.0439             | 1.1 | 0.41                 | 276.9                           | 3.1  | 273.9              | 6.6  | 248.5              | 57.2  |  |  |
| <i>Sample 11BC1      Bean Canyon amphibolite</i>   |            |                                        |      |                    |      |                    |      |                    |     |                      |                                 |      |                    |      |                    |       |  |  |
| 11BC1_1                                            | 553.1      | 85721                                  | 0.8  | 17.4997            | 1.0  | 0.6196             | 2.7  | 0.0786             | 2.5 | 0.93                 | 488.0                           | 11.8 | 489.6              | 10.6 | 497.1              | 22.7  |  |  |
| 11BC1_1B                                           | 801.9      | 152427                                 | 0.5  | 17.5108            | 0.8  | 0.6213             | 2.1  | 0.0789             | 1.9 | 0.93                 | 489.6                           | 9.0  | 490.7              | 8.1  | 495.7              | 17.3  |  |  |
| 11BC1_2                                            | 1004       | 148227                                 | 0.5  | 17.4424            | 1.1  | 0.6185             | 3.0  | 0.0782             | 2.8 | 0.93                 | 485.6                           | 13.0 | 488.9              | 11.6 | 504.3              | 24.6  |  |  |
| 11BC1_3                                            | 485.3      | 125566                                 | 1.0  | 17.5094            | 1.7  | 0.6165             | 2.7  | 0.0783             | 2.1 | 0.77                 | 485.9                           | 9.7  | 487.7              | 10.4 | 495.9              | 37.8  |  |  |
| 11BC1_4                                            | 1226       | 258888                                 | 0.6  | 17.4996            | 0.5  | 0.6086             | 1.2  | 0.0772             | 1.1 | 0.89                 | 479.7                           | 5.0  | 482.7              | 4.6  | 497.1              | 11.9  |  |  |
| 11BC1_5                                            | 486.7      | 91022                                  | 0.8  | 17.5199            | 1.4  | 0.6089             | 3.0  | 0.0774             | 2.7 | 0.88                 | 480.4                           | 12.4 | 482.9              | 11.7 | 494.5              | 31.7  |  |  |
| 11BC1_6                                            | 1038       | 157775                                 | 0.6  | 17.4476            | 0.6  | 0.6122             | 2.4  | 0.0775             | 2.3 | 0.97                 | 481.0                           | 10.9 | 484.9              | 9.3  | 503.6              | 13.4  |  |  |
| 11BC1_7                                            | 1166       | 281977                                 | 0.5  | 17.4344            | 0.4  | 0.6066             | 2.1  | 0.0767             | 2.1 | 0.98                 | 476.4                           | 9.6  | 481.4              | 8.2  | 505.3              | 9.4   |  |  |
| 11BC1_8                                            | 836.1      | 192030                                 | 0.7  | 17.5121            | 0.9  | 0.6037             | 1.4  | 0.0767             | 1.0 | 0.72                 | 476.3                           | 4.5  | 479.6              | 5.2  | 495.5              | 20.8  |  |  |
| 11BC1_9                                            | 377.4      | 161629                                 | 1.1  | 17.3141            | 2.5  | 0.6054             | 2.8  | 0.0760             | 1.3 | 0.44                 | 472.3                           | 5.7  | 480.6              | 10.9 | 520.5              | 55.9  |  |  |
| 11BC1_10                                           | 558.7      | 90964                                  | 0.8  | 17.2937            | 1.1  | 0.6027             | 1.5  | 0.0756             | 1.1 | 0.69                 | 469.8                           | 4.8  | 479.0              | 5.9  | 523.1              | 24.4  |  |  |
| 11BC1_11                                           | 594.8      | 163797                                 | 0.8  | 17.3638            | 0.8  | 0.6099             | 2.0  | 0.0768             | 1.8 | 0.92                 | 477.0                           | 8.4  | 483.5              | 7.7  | 514.2              | 17.7  |  |  |
| 11BC1_12                                           | 775.8      | 183114                                 | 0.8  | 17.2944            | 1.5  | 0.6255             | 1.7  | 0.0785             | 0.9 | 0.52                 | 486.9                           | 4.2  | 493.3              | 6.7  | 523.0              | 32.2  |  |  |
| 11BC1_13                                           | 915.6      | 211672                                 | 0.7  | 17.4368            | 1.0  | 0.6210             | 4.1  | 0.0785             | 4.0 | 0.97                 | 487.4                           | 18.8 | 490.5              | 16.0 | 505.0              | 21.5  |  |  |
| 11BC1_14                                           | 1207       | 220558                                 | 0.6  | 17.3852            | 0.5  | 0.6650             | 4.4  | 0.0838             | 4.4 | 0.99                 | 519.0                           | 22.0 | 517.7              | 18.0 | 511.6              | 10.6  |  |  |
| 11BC1_15                                           | 910.3      | 152651                                 | 0.5  | 17.6264            | 0.8  | 0.5668             | 5.1  | 0.0725             | 5.1 | 0.99                 | 451.0                           | 22.2 | 456.0              | 18.9 | 481.2              | 16.8  |  |  |
| 11BC1_16                                           | 956.5      | 327209                                 | 0.8  | 17.4496            | 0.9  | 0.6293             | 1.5  | 0.0796             | 1.2 | 0.79                 | 494.0                           | 5.6  | 495.6              | 5.9  | 503.4              | 20.4  |  |  |
| 11BC1_17                                           | 2419       | 182301                                 | 0.4  | 17.4483            | 0.4  | 0.6099             | 4.0  | 0.0772             | 4.0 | 1.00                 | 479.3                           | 18.3 | 483.5              | 15.3 | 503.6              | 8.4   |  |  |
| 11BC1_18                                           | 658        | 70935                                  | 1.0  | 17.3679            | 1.6  | 0.6076             | 2.4  | 0.0765             | 1.8 | 0.75                 | 475.4                           | 8.3  | 482.0              | 9.3  | 513.7              | 35.5  |  |  |
| 11BC1_19                                           | 438.4      | 66735                                  | 1.0  | 17.3440            | 2.4  | 0.6321             | 2.7  | 0.0795             | 1.2 | 0.45                 | 493.2                           | 5.7  | 497.4              | 10.5 | 516.7              | 52.3  |  |  |
| 11BC1_20                                           | 524.8      | 206375                                 | 0.7  | 17.4281            | 1.5  | 0.6430             | 2.1  | 0.0813             | 1.4 | 0.67                 | 503.7                           | 6.8  | 504.2              | 8.2  | 506.1              | 33.6  |  |  |
| 11BC1_21                                           | 913        | 148698                                 | 0.6  | 17.3440            | 0.6  | 0.6383             | 1.3  | 0.0803             | 1.2 | 0.90                 | 497.9                           | 5.8  | 501.2              | 5.3  | 516.7              | 12.7  |  |  |
| 11BC1_22                                           | 275.5      | 57179                                  | 0.6  | 17.6135            | 1.3  | 0.6281             | 1.7  | 0.0802             | 1.2 | 0.67                 | 497.5                           | 5.5  | 494.9              | 6.8  | 482.8              | 28.5  |  |  |
| 11BC1_23                                           | 700        | 224504                                 | 0.9  | 17.4172            | 1.3  | 0.6126             | 1.6  | 0.0774             | 1.0 | 0.62                 | 480.5                           | 4.6  | 485.2              | 6.2  | 507.5              | 27.8  |  |  |
| 11BC1_24                                           | 377.2      | 75647                                  | 0.6  | 17.5252            | 2.6  | 0.6113             | 2.8  | 0.0777             | 1.2 | 0.44                 | 482.4                           | 5.8  | 484.4              | 11.0 | 493.9              | 56.5  |  |  |
| 11BC1_25                                           | 837        | 151509                                 | 0.9  | 17.3880            | 1.2  | 0.6420             | 1.6  | 0.0810             | 1.0 | 0.63                 | 501.8                           | 4.8  | 503.5              | 6.3  | 511.2              | 26.9  |  |  |
| 11BC1_26                                           | 619.3      | 250019                                 | 0.9  | 17.3746            | 1.1  | 0.6439             | 3.0  | 0.0811             | 2.8 | 0.94                 | 502.9                           | 13.8 | 504.7              | 12.1 | 512.9              | 23.3  |  |  |
| 11BC1_27                                           | 731.7      | 241930                                 | 0.9  | 17.4394            | 1.5  | 0.6265             | 1.6  | 0.0792             | 0.5 | 0.33                 | 491.6                           | 2.4  | 493.9              | 6.1  | 504.7              | 32.3  |  |  |
| 11BC1_28                                           | 898.1      | 11621                                  | 0.5  | 17.1261            | 2.5  | 0.6367             | 3.6  | 0.0791             | 2.5 | 0.71                 | 490.7                           | 12.0 | 500.3              | 14.1 | 544.5              | 55.1  |  |  |
| 11BC1_29                                           | 1346       | 317592                                 | 0.5  | 17.4560            | 1.0  | 0.6058             | 1.7  | 0.0767             | 1.3 | 0.81                 | 476.3                           | 6.2  | 480.9              | 6.4  | 502.6              | 21.4  |  |  |

**Table SD1 (Continued).**

| Analysis | U     | <sup>206</sup> Pb | U/Th | Isotope ratios     |     |                    |     |                    |     | Error | Isotopic ages (Ma) <sup>§</sup> |      |                    |      |                    |      |
|----------|-------|-------------------|------|--------------------|-----|--------------------|-----|--------------------|-----|-------|---------------------------------|------|--------------------|------|--------------------|------|
|          |       |                   |      | <sup>206</sup> Pb* | ±   | <sup>207</sup> Pb* | ±   | <sup>206</sup> Pb* | ±   |       | <sup>206</sup> Pb*              | ±    | <sup>207</sup> Pb* | ±    | <sup>206</sup> Pb* | ±    |
|          | (ppm) | <sup>204</sup> Pb |      | <sup>207</sup> Pb* | (%) | <sup>235</sup> U*  | (%) | <sup>238</sup> U   | (%) |       | <sup>238</sup> U                | (Ma) | <sup>235</sup> U*  | (Ma) | <sup>207</sup> Pb* | (Ma) |
| 11BC1_30 | 1234  | 127264            | 0.5  | 17.4314            | 0.4 | 0.6286             | 1.9 | 0.0795             | 1.8 | 0.97  | 493.0                           | 8.6  | 495.2              | 7.3  | 505.7              | 9.7  |
| 11BC1_31 | 442.3 | 65835             | 1.2  | 17.4083            | 1.4 | 0.6258             | 2.6 | 0.0790             | 2.2 | 0.85  | 490.3                           | 10.3 | 493.5              | 10.0 | 508.6              | 29.8 |
| 11BC1_32 | 344   | 64650             | 0.8  | 17.6216            | 2.2 | 0.6009             | 2.8 | 0.0768             | 1.6 | 0.59  | 476.9                           | 7.5  | 477.8              | 10.5 | 481.8              | 49.1 |
| 11BC1_33 | 277.5 | 43883             | 0.6  | 17.5442            | 1.9 | 0.6368             | 2.3 | 0.0810             | 1.4 | 0.59  | 502.2                           | 6.6  | 500.3              | 9.1  | 491.5              | 41.0 |
| 11BC1_34 | 683.1 | 163047            | 0.6  | 17.4670            | 1.2 | 0.6298             | 1.5 | 0.0798             | 0.9 | 0.60  | 494.8                           | 4.4  | 496.0              | 6.0  | 501.2              | 27.1 |

\* Radiogenic

§ Decay constants used in age calculations:  $\lambda^{238}\text{U} = 1.55125 \times 10^{-10}$   $\lambda^{235}\text{U} = 9.8485 \times 10^{-10}$  (Jaffey *et al.*, 1971);  $^{238}\text{U}/^{235}\text{U} = 137.88$  (Chen and Wasserberg, 1981). Uncertainties are given as  $\pm 2\sigma$  in last three figures.

Common Pb correction from measured  $^{206}\text{Pb}/^{204}\text{Pb}$ , with initial Pb composition from Stacey and Kramers (1975).
