# Supplementary material
Source: publisher figshare collection journal article supplement (https://gsapubs.figshare.com/ndownloader/files/22398732)
Supplement: Supplementary file 1 [file 22398732 › SD_T2.pdf]

**Table SD2.** ID-TIMS U-Pb zircon data for plutonic and metavolcanic rocks of the southern Sierra Nevada batholith.

| Sample  | Fraction<br>( $\mu\text{m}$ ) | Amount<br>(mg) | $^{238}\text{U}$<br>(ppm) | $^{206}\text{Pb}^*$<br>(ppm) | Atomic ratios     |                     |                     |                     | Isotopic ages (Ma) <sup>§</sup> |                     |                     |
|---------|-------------------------------|----------------|---------------------------|------------------------------|-------------------|---------------------|---------------------|---------------------|---------------------------------|---------------------|---------------------|
|         |                               |                |                           |                              | $^{206}\text{Pb}$ | $^{206}\text{Pb}^*$ | $^{207}\text{Pb}^*$ | $^{207}\text{Pb}^*$ | $^{206}\text{Pb}^*$             | $^{207}\text{Pb}^*$ | $^{207}\text{Pb}^*$ |
|         |                               |                |                           |                              | $^{204}\text{Pb}$ | $^{238}\text{U}$    | $^{235}\text{U}^*$  | $^{206}\text{Pb}^*$ | $^{238}\text{U}$                | $^{235}\text{U}^*$  | $^{206}\text{Pb}^*$ |
| 91TH181 | <45 $\mu$                     | 1.9            | 653                       | 8.1                          | 9078              | 0.01439(09)         | 0.0959              | 0.04790(06)         | 92.1                            | 92.2                | 94                  |
|         | 45-62 $\mu$                   | 2.1            | 610                       | 7.6                          | 10103             | 0.01434(10)         | 0.0948              | 0.04795(07)         | 91.8                            | 92.0                | 97                  |
|         | 62-80 $\mu$                   | 2.2            | 579                       | 7.2                          | 8535              | 0.01440(12)         | 0.0958              | 0.04826(08)         | 92.2                            | 92.9                | 112                 |
|         | 80-100 $\mu$                  | 1.8            | 426                       | 5.5                          | 7809              | 0.01445(13)         | 0.0968              | 0.04861(08)         | 92.5                            | 93.9                | 129                 |
| 93TH417 | <45 $\mu$                     | 1.5            | 563                       | 7.0                          | 11789             | 0.01429(13)         | 0.0942              | 0.04781(07)         | 91.5                            | 91.4                | 90                  |
|         | 45-62 $\mu$                   | 1.8            | 533                       | 6.7                          | 10045             | 0.01442(12)         | 0.0952              | 0.04789(08)         | 92.3                            | 92.4                | 94                  |
|         | 62-80 $\mu$                   | 1.7            | 541                       | 6.8                          | 9137              | 0.01453(13)         | 0.0977              | 0.04877(09)         | 93.0                            | 94.6                | 137                 |
|         | 80-100 $\mu$                  | 1.3            | 498                       | 6.3                          | 7899              | 0.01451(12)         | 0.0969              | 0.04844(11)         | 92.9                            | 93.9                | 121                 |
| 91TH140 | <45 $\mu$                     | 0.8            | 306                       | 4.3                          | 4299              | 0.01606(12)         | 0.1065              | 0.04810(09)         | 102.8                           | 102.7               | 104                 |
|         | 80-45 $\mu$                   | 0.5            | 269                       | 3.8                          | 3378              | 0.01612(14)         | 0.1073              | 0.04827(11)         | 103.1                           | 103.5               | 113                 |

\* Radiogenic; nonradiogenic correction based on 25 picogram blank Pb as determined by periodic measurements and initial Pb determinations from Saleeby *et al.* (2008) of 1:18.632:15.601:38.735.

§ Decay constants used in age calculations:  $\lambda^{238}\text{U} = 1.55125 \times 10^{-10}$   $\lambda^{235}\text{U} = 9.8485 \times 10^{-10}$  (Jaffey *et al.*, 1971);  $^{238}\text{U}/^{235}\text{U} = 137.88$  (Chen and Wasserberg, 1981). Uncertainties in  $^{206}\text{Pb}^*/^{238}\text{U}$  and  $^{207}\text{Pb}^*/^{206}\text{Pb}^*$  are given as  $\pm 2\sigma$  in last two figures. Common Pb correction from measured  $^{206}\text{Pb}/^{204}\text{Pb}$ , with initial Pb composition from Stacey and Kramers (1975).
