# Supplementary material
Source: publisher figshare collection journal article supplement (https://gsapubs.figshare.com/ndownloader/files/22398732)
Supplement: Supplementary file 1 [file 22398732 › SD_T3.pdf]

**Table SD3. LA-MC-ICPMS U-Pb detrital zircon data for metamorphic pendant rocks of the southern Sierra Nevada batholith.†**

| Analysis                                                | U<br>(ppm) | <sup>206</sup> Pb<br><sup>204</sup> Pb | U/Th | Isotope ratios     |     |                    |      |                    |     |                      | Isotopic ages (Ma) <sup>§</sup> |       |                    |      |                    |       |
|---------------------------------------------------------|------------|----------------------------------------|------|--------------------|-----|--------------------|------|--------------------|-----|----------------------|---------------------------------|-------|--------------------|------|--------------------|-------|
|                                                         |            |                                        |      | <sup>206</sup> Pb* | ±   | <sup>207</sup> Pb* | ±    | <sup>206</sup> Pb* | ±   | Error<br>correlation | <sup>206</sup> Pb*              | ±     | <sup>207</sup> Pb* | ±    | <sup>206</sup> Pb* | ±     |
|                                                         |            |                                        |      | <sup>207</sup> Pb* | (%) | <sup>235</sup> U*  | (%)  | <sup>238</sup> U   | (%) |                      | <sup>238</sup> U                | (Ma)  | <sup>235</sup> U*  | (Ma) | <sup>207</sup> Pb* | (Ma)  |
| <i>Sample 07BC60      Bean Canyon pendant quartzite</i> |            |                                        |      |                    |     |                    |      |                    |     |                      |                                 |       |                    |      |                    |       |
| 08BC60-1                                                | 433        | 101608                                 | 2.2  | 9.0912             | 0.6 | 4.5693             | 1.1  | 0.3013             | 0.9 | 0.84                 | 1697.6                          | 14.0  | 1743.7             | 9.3  | 1799.3             | 10.9  |
| 08BC60-2                                                | 261        | 45856                                  | 2.8  | 11.0421            | 2.5 | 2.8781             | 3.6  | 0.2305             | 2.6 | 0.73                 | 1337.1                          | 31.5  | 1376.2             | 27.1 | 1437.4             | 47.1  |
| 08BC60-3                                                | 622        | 181943                                 | 5.3  | 9.1134             | 0.4 | 4.4873             | 3.0  | 0.2966             | 3.0 | 0.99                 | 1674.4                          | 44.5  | 1728.6             | 25.3 | 1794.9             | 7.2   |
| 08BC60-4                                                | 421        | 135550                                 | 6.9  | 9.1146             | 0.9 | 4.5832             | 1.9  | 0.3030             | 1.7 | 0.89                 | 1706.0                          | 25.8  | 1746.2             | 16.0 | 1794.6             | 15.7  |
| 08BC60-5                                                | 511        | 246994                                 | 3.3  | 9.1523             | 0.9 | 4.4190             | 3.5  | 0.2933             | 3.3 | 0.97                 | 1658.1                          | 48.8  | 1715.9             | 28.6 | 1787.1             | 16.2  |
| 08BC60-6                                                | 220        | 71550                                  | 3.2  | 9.2493             | 1.4 | 4.4750             | 2.5  | 0.3002             | 2.0 | 0.81                 | 1692.3                          | 30.2  | 1726.4             | 20.7 | 1767.9             | 26.4  |
| 08BC60-7                                                | 234        | 104856                                 | 5.4  | 5.6164             | 0.7 | 10.7448            | 2.6  | 0.4377             | 2.5 | 0.97                 | 2340.2                          | 49.6  | 2501.3             | 24.3 | 2634.8             | 11.1  |
| 08BC60-8                                                | 149        | 85338                                  | 2.3  | 9.2390             | 2.1 | 4.5515             | 3.3  | 0.3050             | 2.6 | 0.78                 | 1716.0                          | 39.4  | 1740.4             | 27.8 | 1769.9             | 38.1  |
| 08BC60-9                                                | 762        | 160145                                 | 5.6  | 9.1369             | 0.6 | 4.7940             | 5.0  | 0.3177             | 5.0 | 0.99                 | 1778.4                          | 77.8  | 1783.8             | 42.4 | 1790.2             | 11.0  |
| 08BC60-10                                               | 209        | 44432                                  | 2.1  | 9.1187             | 1.3 | 4.3709             | 3.7  | 0.2891             | 3.5 | 0.94                 | 1636.9                          | 50.3  | 1706.8             | 30.7 | 1793.8             | 23.6  |
| 08BC60-11                                               | 459        | 86756                                  | 5.6  | 9.1299             | 0.6 | 4.8694             | 4.3  | 0.3224             | 4.3 | 0.99                 | 1801.6                          | 67.5  | 1797.0             | 36.6 | 1791.6             | 11.0  |
| 08BC60-12                                               | 598        | 260789                                 | 9.0  | 9.1595             | 0.8 | 4.5367             | 2.5  | 0.3014             | 2.4 | 0.95                 | 1698.2                          | 35.8  | 1737.7             | 21.0 | 1785.7             | 14.0  |
| 08BC60-13                                               | 97         | 39396                                  | 1.5  | 9.1312             | 1.7 | 4.6421             | 3.0  | 0.3074             | 2.5 | 0.83                 | 1728.0                          | 38.2  | 1756.9             | 25.4 | 1791.3             | 31.1  |
| 08BC60-14                                               | 94         | 19783                                  | 1.6  | 8.5879             | 3.0 | 5.1574             | 3.2  | 0.3212             | 1.2 | 0.37                 | 1795.7                          | 18.6  | 1845.6             | 27.4 | 1902.3             | 53.9  |
| 08BC60-16                                               | 507        | 94653                                  | 8.0  | 8.9865             | 1.0 | 4.9100             | 9.0  | 0.3200             | 9.0 | 0.99                 | 1789.8                          | 140.2 | 1804.0             | 76.3 | 1820.4             | 18.8  |
| 08BC60-17                                               | 276        | 57681                                  | 4.5  | 9.2259             | 1.5 | 4.5062             | 3.4  | 0.3015             | 3.1 | 0.90                 | 1698.8                          | 46.1  | 1732.1             | 28.4 | 1772.5             | 26.8  |
| 08BC60-18                                               | 308        | 71488                                  | 3.6  | 9.1615             | 1.3 | 4.5499             | 2.4  | 0.3023             | 2.0 | 0.85                 | 1702.8                          | 30.5  | 1740.1             | 20.0 | 1785.3             | 23.3  |
| 08BC60-19                                               | 98         | 23730                                  | 3.0  | 11.1187            | 4.0 | 2.9230             | 4.5  | 0.2357             | 2.0 | 0.46                 | 1364.4                          | 25.1  | 1387.9             | 33.7 | 1424.2             | 75.6  |
| 08BC60-20                                               | 401        | 145021                                 | 6.5  | 9.1097             | 0.7 | 4.6857             | 2.7  | 0.3096             | 2.6 | 0.97                 | 1738.7                          | 39.6  | 1764.7             | 22.5 | 1795.6             | 12.8  |
| 08BC60-21                                               | 188        | 66895                                  | 3.5  | 8.9906             | 2.0 | 4.7396             | 4.7  | 0.3091             | 4.2 | 0.90                 | 1736.0                          | 64.3  | 1774.3             | 39.2 | 1819.5             | 36.4  |
| 08BC60-22                                               | 290        | 92491                                  | 6.7  | 9.1422             | 0.7 | 4.7691             | 4.1  | 0.3162             | 4.1 | 0.98                 | 1771.2                          | 62.9  | 1779.5             | 34.7 | 1789.1             | 13.6  |
| 08BC60-23                                               | 342        | 170208                                 | 3.4  | 9.0726             | 0.7 | 4.5684             | 2.8  | 0.3006             | 2.7 | 0.97                 | 1694.3                          | 40.6  | 1743.5             | 23.3 | 1803.1             | 11.8  |
| 08BC60-24                                               | 439        | 147481                                 | 2.9  | 9.1210             | 0.7 | 4.4757             | 4.1  | 0.2961             | 4.1 | 0.99                 | 1671.8                          | 60.0  | 1726.5             | 34.3 | 1793.4             | 12.7  |
| 08BC60-25                                               | 59         | 15001                                  | 1.9  | 10.9441            | 4.6 | 2.9613             | 5.1  | 0.2350             | 2.2 | 0.44                 | 1360.9                          | 27.4  | 1397.7             | 38.6 | 1454.4             | 87.0  |
| 08BC60-26                                               | 319        | 75004                                  | 2.7  | 9.2403             | 0.8 | 4.6041             | 2.3  | 0.3086             | 2.1 | 0.93                 | 1733.6                          | 32.1  | 1750.0             | 18.9 | 1769.7             | 15.0  |
| 08BC60-27                                               | 790        | 228418                                 | 3.6  | 9.3419             | 0.6 | 3.8586             | 2.7  | 0.2614             | 2.6 | 0.98                 | 1497.2                          | 35.0  | 1605.1             | 21.6 | 1749.7             | 10.1  |
| 08BC60-28                                               | 313        | 143603                                 | 4.8  | 8.1641             | 0.6 | 5.8528             | 4.2  | 0.3466             | 4.1 | 0.99                 | 1918.1                          | 68.8  | 1954.3             | 36.4 | 1992.8             | 10.5  |
| 08BC60-29                                               | 199        | 60747                                  | 2.8  | 9.2885             | 1.3 | 4.4533             | 3.1  | 0.3000             | 2.8 | 0.90                 | 1691.3                          | 41.1  | 1722.3             | 25.5 | 1760.2             | 24.6  |
| 08BC60-32                                               | 236        | 73027                                  | 3.9  | 9.0634             | 1.2 | 4.6636             | 1.9  | 0.3066             | 1.5 | 0.78                 | 1723.7                          | 22.6  | 1760.7             | 16.0 | 1804.9             | 21.7  |
| 08BC60-33                                               | 224        | 34998                                  | 2.2  | 11.1339            | 3.3 | 2.9909             | 5.8  | 0.2415             | 4.8 | 0.82                 | 1394.6                          | 60.4  | 1405.3             | 44.5 | 1421.6             | 63.2  |
| 08BC60-35                                               | 477        | 141295                                 | 9.1  | 8.7679             | 0.7 | 3.9260             | 6.0  | 0.2497             | 6.0 | 0.99                 | 1436.7                          | 77.1  | 1619.1             | 48.8 | 1865.0             | 11.9  |
| 08BC60-36                                               | 79         | 13176                                  | 2.3  | 9.5739             | 2.8 | 3.9518             | 3.9  | 0.2744             | 2.7 | 0.69                 | 1563.1                          | 36.9  | 1624.4             | 31.4 | 1704.6             | 52.0  |
| 08BC60-37                                               | 233        | 76190                                  | 2.1  | 4.9281             | 0.6 | 14.4471            | 4.1  | 0.5164             | 4.1 | 0.99                 | 2683.8                          | 89.5  | 2779.5             | 39.1 | 2849.8             | 9.5   |
| 08BC60-38                                               | 293        | 97282                                  | 3.7  | 9.2179             | 1.1 | 4.2751             | 1.7  | 0.2858             | 1.3 | 0.76                 | 1620.6                          | 18.4  | 1688.6             | 13.8 | 1774.1             | 19.8  |
| 08BC60-39                                               | 734        | 174670                                 | 16.3 | 9.1238             | 0.2 | 4.2914             | 3.5  | 0.2840             | 3.5 | 1.00                 | 1611.3                          | 49.8  | 1691.7             | 28.8 | 1792.8             | 4.4   |
| 08BC60-40                                               | 143        | 69582                                  | 2.2  | 5.4953             | 1.1 | 10.9430            | 2.7  | 0.4361             | 2.5 | 0.92                 | 2333.3                          | 48.8  | 2518.3             | 25.3 | 2670.9             | 17.8  |
| 08BC60-41                                               | 132        | 36954                                  | 2.6  | 8.7751             | 1.7 | 4.4284             | 3.8  | 0.2818             | 3.4 | 0.89                 | 1600.6                          | 48.4  | 1717.7             | 31.7 | 1863.5             | 31.0  |
| 08BC60-42                                               | 239        | 91937                                  | 4.1  | 8.4833             | 1.0 | 5.3000             | 4.5  | 0.3261             | 4.3 | 0.97                 | 1819.4                          | 68.8  | 1868.9             | 38.1 | 1924.3             | 17.8  |
| 08BC60-43                                               | 77         | 13797                                  | 2.4  | 13.1489            | 7.1 | 1.8081             | 9.5  | 0.1724             | 6.3 | 0.66                 | 1025.5                          | 59.4  | 1048.4             | 62.1 | 1096.4             | 142.8 |
| 08BC60-44                                               | 207        | 39718                                  | 3.1  | 11.1394            | 1.8 | 2.8778             | 2.2  | 0.2325             | 1.2 | 0.55                 | 1347.6                          | 14.6  | 1376.1             | 16.4 | 1420.7             | 34.7  |
| 08BC60-45                                               | 59         | 10864                                  | 2.9  | 11.5016            | 8.1 | 2.7933             | 9.3  | 0.2330             | 4.6 | 0.49                 | 1350.2                          | 55.5  | 1353.7             | 69.8 | 1359.2             | 157.0 |
| 08BC60-46                                               | 95         | 28438                                  | 1.1  | 4.9077             | 0.7 | 14.0820            | 2.7  | 0.5012             | 2.6 | 0.96                 | 2619.1                          | 56.0  | 2755.2             | 25.6 | 2856.6             | 12.0  |
| 08BC60-48                                               | 345        | 50833                                  | 3.8  | 9.1575             | 0.8 | 4.5895             | 3.5  | 0.3048             | 3.4 | 0.97                 | 1715.2                          | 50.7  | 1747.4             | 29.0 | 1786.1             | 15.3  |
| 08BC60-50                                               | 354        | 60842                                  | 8.3  | 9.1469             | 0.6 | 4.5526             | 3.4  | 0.3020             | 3.3 | 0.98                 | 1701.3                          | 49.8  | 1740.6             | 28.2 | 1788.2             | 11.3  |
| 08BC60-51                                               | 397        | 279777                                 | 7.8  | 9.1527             | 0.7 | 4.3835             | 1.9  | 0.2910             | 1.8 | 0.93                 | 1646.4                          | 26.0  | 1709.2             | 16.0 | 1787.1             | 13.3  |
| 08BC60-52                                               | 83         | 22887                                  | 1.9  | 9.9808             | 2.9 | 3.7248             | 4.0  | 0.2696             | 2.8 | 0.70                 | 1538.9                          | 37.8  | 1576.7             | 31.8 | 1627.6             | 53.0  |
| 08BC60-53                                               | 307        | 91849                                  | 2.7  | 9.1799             | 1.5 | 4.2397             | 4.1  | 0.2823             | 3.8 | 0.93                 | 1602.8                          | 54.3  | 1681.7             | 33.6 | 1781.6             | 26.5  |
| 08BC60-54                                               | 76         | 16004                                  | 2.3  | 13.4453            | 9.9 | 1.8591             | 10.2 | 0.1813             | 2.5 | 0.25                 | 1074.0                          | 25.1  | 1066.7             | 67.3 | 1051.7             | 199.2 |
| 08BC60-55                                               | 380        | 107792                                 | 4.5  | 9.1570             | 0.8 | 4.8617             | 4.0  | 0.3229             | 4.0 | 0.98                 | 1803.8                          | 62.3  | 1795.6             | 34.0 | 1786.2             | 14.4  |
| 08BC60-56                                               | 79         | 30801                                  | 2.4  | 9.5514             | 2.6 | 4.2919             | 3.4  | 0.2973             | 2.2 | 0.65                 | 1678.0                          | 32.8  | 1691.8             | 28.3 | 1709.0             | 48.3  |
| 08BC60-57                                               | 168        | 58425                                  | 1.4  | 9.2473             | 0.9 | 4.6824             | 4.3  | 0.3140             | 4.2 | 0.98                 | 1760.6                          | 64.2  | 1764.1             | 35.6 | 1768.3             | 15.7  |
| 08BC60-58                                               | 103        | 34307                                  | 1.5  | 9.2653             | 1.7 | 4.7744             | 4.4  | 0.3208             | 4.1 | 0.92                 | 1793.8                          | 63.5  | 1780.4             | 36.9 | 1764.7             | 31.1  |
| 08BC60-59                                               | 211        | 106526                                 | 2.0  | 9.1541             | 0.9 | 4.6580             | 2.3  | 0.3093             | 2.1 | 0.92                 | 1737.0                          | 32.5  | 1759.7             | 19.5 | 1786.8             | 17.1  |
| 08BC60-60                                               | 352        | 106534                                 | 3.2  | 9.1039             | 1.1 | 4.6487             | 4.1  | 0.3069             | 3.9 | 0.96                 | 1725.7                          | 59.1  | 1758.1             | 34.0 | 1796.8             | 20.8  |
| 08BC60-61                                               | 270        | 126561                                 | 2.0  | 9.0861             | 0.8 | 4.8513             | 3.5  | 0.3197             | 3.4 | 0.97                 | 1788.2                          | 53.3  | 1793.8             | 29.5 | 1800.4             | 14.8  |
| 08BC60-62                                               | 281        | 53418                                  | 2.5  | 9.0712             | 0.6 | 4.8560             | 5.3  | 0.3195             | 5.2 | 0.99                 | 1787.2                          | 81.9  | 1794.7             | 44.5 | 1803.3             | 10.3  |
| 08BC60-63                                               | 161        | 47689                                  | 2.0  | 9.1731             | 1.4 | 5.0005             | 2.8  | 0.3327             | 2.4 | 0.87                 | 1851.4                          | 38.3  | 1819.4             | 23.3 | 1783.0             | 25.2  |
| 08BC60-64                                               | 174        | 31740                                  | 2.4  | 10.9978            | 2.0 | 2.9273             | 3.5  | 0.2335             | 2.8 | 0.81                 | 1352.8                          | 34.2  | 1389.0             | 26.2 | 1445.1             | 38.6  |

Table SD3 (Continued).

| Analysis   | U<br>(ppm) | $^{206}\text{Pb}$<br>$^{204}\text{Pb}$ | U/Th | Isotope ratios      |       |                     |       |                     |       | Error<br>correlation | Isotopic ages (Ma) <sup>§</sup> |       |                     |       |                     |       |
|------------|------------|----------------------------------------|------|---------------------|-------|---------------------|-------|---------------------|-------|----------------------|---------------------------------|-------|---------------------|-------|---------------------|-------|
|            |            |                                        |      | $^{206}\text{Pb}^*$ | $\pm$ | $^{207}\text{Pb}^*$ | $\pm$ | $^{206}\text{Pb}^*$ | $\pm$ |                      | $^{206}\text{Pb}^*$             | $\pm$ | $^{207}\text{Pb}^*$ | $\pm$ | $^{206}\text{Pb}^*$ | $\pm$ |
|            |            |                                        |      | $^{207}\text{Pb}^*$ | (%)   | $^{235}\text{U}^*$  | (%)   | $^{238}\text{U}$    | (%)   |                      | $^{238}\text{U}$                | (Ma)  | $^{235}\text{U}^*$  | (Ma)  | $^{207}\text{Pb}^*$ | (Ma)  |
| 08BC60-65  | 176        | 32889                                  | 2.6  | 9.0978              | 1.4   | 4.5883              | 2.9   | 0.3027              | 2.6   | 0.88                 | 1704.9                          | 38.8  | 1747.1              | 24.5  | 1798.0              | 25.2  |
| 08BC60-66  | 186        | 36345                                  | 7.2  | 9.4298              | 2.0   | 4.3232              | 4.0   | 0.2957              | 3.5   | 0.87                 | 1669.8                          | 51.6  | 1697.8              | 33.2  | 1732.5              | 36.0  |
| 08BC60-67  | 134        | 56430                                  | 4.5  | 9.0071              | 2.7   | 4.7390              | 4.3   | 0.3096              | 3.4   | 0.78                 | 1738.6                          | 51.2  | 1774.2              | 36.3  | 1816.2              | 49.4  |
| 08BC60-68  | 689        | 463029                                 | 13.9 | 9.0624              | 0.4   | 4.2412              | 4.3   | 0.2788              | 4.3   | 1.00                 | 1585.1                          | 60.7  | 1682.0              | 35.6  | 1805.1              | 6.8   |
| 08BC60-69  | 138        | 44373                                  | 4.0  | 8.9475              | 2.2   | 4.5836              | 3.1   | 0.2974              | 2.2   | 0.70                 | 1678.6                          | 32.6  | 1746.3              | 26.2  | 1828.3              | 40.4  |
| 08BC60-70  | 116        | 22947                                  | 4.2  | 8.7264              | 1.8   | 5.0276              | 3.6   | 0.3182              | 3.1   | 0.86                 | 1780.9                          | 48.7  | 1824.0              | 30.7  | 1873.5              | 32.9  |
| 08BC60-71  | 432        | 42608                                  | 5.8  | 8.9187              | 0.8   | 4.9886              | 8.2   | 0.3227              | 8.1   | 1.00                 | 1802.8                          | 128.1 | 1817.4              | 69.3  | 1834.1              | 13.8  |
| 08BC60-72  | 209        | 37877                                  | 2.6  | 11.2438             | 2.2   | 2.7287              | 3.4   | 0.2225              | 2.6   | 0.76                 | 1295.2                          | 30.1  | 1336.3              | 25.1  | 1402.8              | 42.2  |
| 08BC60-73  | 147        | 32446                                  | 3.1  | 9.4838              | 1.9   | 4.2521              | 2.7   | 0.2925              | 1.8   | 0.68                 | 1653.9                          | 26.5  | 1684.2              | 21.9  | 1722.0              | 35.8  |
| 08BC60-74  | 478        | 242215                                 | 1.1  | 5.5836              | 0.4   | 10.5116             | 2.4   | 0.4257              | 2.4   | 0.99                 | 2286.2                          | 45.5  | 2480.9              | 22.2  | 2644.5              | 6.3   |
| 08BC60-75  | 651        | 118578                                 | 6.4  | 8.9820              | 0.5   | 4.8586              | 2.5   | 0.3165              | 2.4   | 0.98                 | 1772.6                          | 37.2  | 1795.1              | 20.7  | 1821.3              | 9.5   |
| 08BC60-76  | 228        | 158461                                 | 3.5  | 9.4642              | 1.2   | 3.9582              | 2.3   | 0.2717              | 2.0   | 0.86                 | 1549.4                          | 27.3  | 1625.7              | 18.7  | 1725.8              | 21.6  |
| 08BC60-77  | 192        | 134748                                 | 4.8  | 6.7577              | 2.8   | 7.6203              | 5.2   | 0.3735              | 4.4   | 0.84                 | 2045.8                          | 76.6  | 2187.3              | 46.7  | 2322.7              | 48.1  |
| 08BC60-78  | 103        | 18550                                  | 2.5  | 10.6716             | 3.5   | 3.0676              | 4.4   | 0.2374              | 2.6   | 0.59                 | 1373.3                          | 31.6  | 1424.6              | 33.4  | 1502.2              | 66.8  |
| 08BC60-79  | 210        | 37684                                  | 3.3  | 10.9144             | 2.2   | 3.0650              | 3.8   | 0.2426              | 3.1   | 0.82                 | 1400.3                          | 39.0  | 1424.0              | 29.0  | 1459.5              | 41.4  |
| 08BC60-80  | 135        | 27500                                  | 4.2  | 9.4311              | 1.5   | 4.1994              | 3.0   | 0.2872              | 2.6   | 0.86                 | 1627.7                          | 37.9  | 1673.9              | 25.0  | 1732.3              | 28.1  |
| 08BC60-81  | 124        | 51479                                  | 1.2  | 9.0450              | 1.2   | 4.7456              | 2.9   | 0.3113              | 2.7   | 0.92                 | 1747.2                          | 41.3  | 1775.3              | 24.7  | 1808.6              | 21.4  |
| 08BC60-82  | 72         | 24485                                  | 1.0  | 5.3239              | 1.8   | 12.5278             | 3.1   | 0.4837              | 2.5   | 0.82                 | 2543.5                          | 52.9  | 2644.8              | 29.0  | 2723.3              | 29.2  |
| 08BC60-83  | 538        | 76863                                  | 4.7  | 9.2464              | 0.7   | 4.1637              | 2.5   | 0.2792              | 2.4   | 0.96                 | 1587.5                          | 33.7  | 1666.9              | 20.5  | 1768.5              | 13.5  |
| 08BC60-84  | 84         | 45401                                  | 0.9  | 6.2887              | 1.4   | 9.6174              | 3.4   | 0.4386              | 3.0   | 0.91                 | 2344.6                          | 59.8  | 2398.8              | 30.9  | 2445.2              | 23.9  |
| 08BC60-85  | 434        | 128105                                 | 3.4  | 8.9880              | 0.7   | 4.8149              | 2.3   | 0.3139              | 2.2   | 0.95                 | 1759.7                          | 33.3  | 1787.5              | 19.1  | 1820.1              | 12.9  |
| 08BC60-86  | 88         | 21222                                  | 5.0  | 8.9661              | 1.8   | 4.7362              | 3.3   | 0.3080              | 2.8   | 0.84                 | 1730.8                          | 42.3  | 1773.7              | 27.9  | 1824.5              | 32.8  |
| 08BC60-87  | 364        | 148180                                 | 2.0  | 8.7178              | 1.6   | 4.6549              | 2.2   | 0.2943              | 1.6   | 0.70                 | 1663.1                          | 23.0  | 1759.2              | 18.6  | 1875.3              | 28.5  |
| 08BC60-89  | 379        | 61283                                  | 2.0  | 9.0956              | 1.2   | 4.4586              | 2.2   | 0.2941              | 1.8   | 0.84                 | 1662.1                          | 26.8  | 1723.3              | 18.0  | 1798.4              | 21.4  |
| 08BC60-90  | 88         | 15967                                  | 2.8  | 10.9884             | 4.1   | 2.9980              | 5.0   | 0.2389              | 2.9   | 0.58                 | 1381.1                          | 36.4  | 1407.1              | 38.4  | 1446.7              | 78.2  |
| 08BC60-91  | 339        | 154221                                 | 2.8  | 9.1762              | 1.2   | 4.6195              | 3.0   | 0.3074              | 2.7   | 0.91                 | 1728.1                          | 40.9  | 1752.8              | 24.8  | 1782.4              | 22.4  |
| 08BC60-92  | 238        | 131455                                 | 3.0  | 4.7462              | 0.4   | 14.7037             | 2.9   | 0.5061              | 2.9   | 0.99                 | 2640.1                          | 63.0  | 2796.3              | 27.9  | 2910.9              | 6.4   |
| 08BC60-93  | 77         | 90489                                  | 2.1  | 5.4574              | 1.2   | 12.4430             | 1.8   | 0.4925              | 1.4   | 0.76                 | 2581.5                          | 29.6  | 2638.4              | 17.2  | 2682.4              | 19.5  |
| 08BC60-94  | 70         | 31394                                  | 1.6  | 5.1740              | 1.9   | 13.4414             | 3.0   | 0.5044              | 2.3   | 0.77                 | 2632.6                          | 49.3  | 2711.2              | 28.1  | 2770.2              | 31.3  |
| 08BC60-95  | 289        | 65780                                  | 5.2  | 9.0627              | 1.1   | 4.7545              | 2.6   | 0.3125              | 2.3   | 0.90                 | 1753.0                          | 35.8  | 1776.9              | 21.8  | 1805.0              | 20.5  |
| 08BC60-96  | 716        | 26121                                  | 4.3  | 9.3547              | 0.5   | 3.2990              | 3.1   | 0.2238              | 3.1   | 0.99                 | 1302.1                          | 36.3  | 1480.8              | 24.3  | 1747.2              | 8.5   |
| 08BC60-97  | 189        | 87513                                  | 2.5  | 9.4819              | 0.9   | 4.1016              | 2.7   | 0.2821              | 2.5   | 0.94                 | 1601.7                          | 35.7  | 1654.6              | 21.9  | 1722.4              | 17.4  |
| 08BC60-98  | 140        | 30270                                  | 2.2  | 10.9808             | 2.3   | 2.9183              | 5.0   | 0.2324              | 4.4   | 0.88                 | 1347.1                          | 53.5  | 1386.7              | 37.7  | 1448.0              | 44.7  |
| 08BC60-99  | 880        | 343102                                 | 2.1  | 9.1302              | 0.4   | 4.4114              | 2.7   | 0.2921              | 2.6   | 0.99                 | 1652.1                          | 38.3  | 1714.5              | 22.1  | 1791.5              | 8.0   |
| 08BC60-100 | 245        | 42167                                  | 3.2  | 9.5353              | 1.2   | 4.2980              | 2.3   | 0.2972              | 2.0   | 0.87                 | 1677.6                          | 30.0  | 1693.0              | 19.3  | 1712.1              | 21.4  |
| 08BC60-102 | 184        | 50681                                  | 3.5  | 9.0926              | 1.5   | 4.3918              | 2.2   | 0.2896              | 1.7   | 0.76                 | 1639.6                          | 24.6  | 1710.8              | 18.6  | 1799.0              | 26.7  |
| 08BC60-103 | 283        | 70226                                  | 2.4  | 9.1521              | 0.8   | 4.5023              | 2.4   | 0.2989              | 2.3   | 0.95                 | 1685.6                          | 33.6  | 1731.4              | 19.9  | 1787.2              | 14.0  |
| 08BC60-104 | 165        | 32086                                  | 1.4  | 9.4118              | 1.0   | 4.0808              | 3.6   | 0.2786              | 3.5   | 0.96                 | 1584.1                          | 48.7  | 1650.5              | 29.4  | 1736.0              | 18.5  |
| 08BC60-105 | 83         | 32580                                  | 1.0  | 9.7072              | 2.4   | 3.8530              | 4.6   | 0.2713              | 3.9   | 0.84                 | 1547.2                          | 53.0  | 1603.9              | 36.8  | 1679.2              | 45.2  |
| 08BC60-106 | 130        | 81291                                  | 1.9  | 5.4211              | 0.9   | 12.1209             | 2.5   | 0.4766              | 2.3   | 0.94                 | 2512.3                          | 47.7  | 2613.8              | 23.0  | 2693.4              | 14.4  |
| 08BC60-107 | 295        | 76126                                  | 4.7  | 9.2166              | 0.9   | 4.4682              | 3.6   | 0.2987              | 3.5   | 0.97                 | 1684.8                          | 52.0  | 1725.1              | 30.1  | 1774.4              | 17.2  |
| 08BC60-108 | 74         | 13845                                  | 1.7  | 11.1038             | 4.9   | 2.8975              | 7.4   | 0.2333              | 5.6   | 0.75                 | 1352.0                          | 67.9  | 1381.3              | 56.1  | 1426.8              | 93.8  |
| 08BC60-109 | 221        | 63369                                  | 1.9  | 9.1149              | 1.0   | 4.6002              | 2.6   | 0.3041              | 2.4   | 0.92                 | 1711.7                          | 35.5  | 1749.3              | 21.4  | 1794.6              | 18.0  |
| 08BC60-110 | 272        | 61866                                  | 2.2  | 8.7227              | 1.3   | 4.8931              | 3.4   | 0.3095              | 3.2   | 0.92                 | 1738.5                          | 48.2  | 1801.1              | 28.9  | 1874.3              | 23.8  |
| 08BC60-111 | 81         | 33310                                  | 5.3  | 8.7041              | 2.0   | 4.9641              | 5.6   | 0.3134              | 5.2   | 0.93                 | 1757.3                          | 80.4  | 1813.2              | 47.5  | 1878.1              | 36.8  |
| 08BC60-112 | 195        | 56478                                  | 3.0  | 9.4003              | 1.8   | 4.2089              | 2.5   | 0.2870              | 1.7   | 0.69                 | 1626.3                          | 24.9  | 1675.8              | 20.4  | 1738.3              | 32.8  |
| 08BC60-113 | 710        | 166191                                 | 9.7  | 9.1639              | 0.6   | 3.9063              | 5.9   | 0.2596              | 5.9   | 0.99                 | 1487.9                          | 78.0  | 1615.0              | 47.8  | 1784.8              | 11.0  |
| 08BC60-114 | 374        | 212273                                 | 5.9  | 9.1292              | 0.8   | 4.6021              | 3.0   | 0.3047              | 2.9   | 0.97                 | 1714.6                          | 43.2  | 1749.7              | 24.7  | 1791.7              | 13.7  |

## Sample 08SE258 Salt Creek pendant metaturbidite

|            |     |       |     |         |     |        |     |        |     |      |        |      |        |      |        |      |
|------------|-----|-------|-----|---------|-----|--------|-----|--------|-----|------|--------|------|--------|------|--------|------|
| 08SE258-1  | 268 | 21764 | 1.7 | 11.0809 | 1.2 | 2.5492 | 2.9 | 0.2049 | 2.7 | 0.90 | 1201.4 | 29.0 | 1286.2 | 21.4 | 1430.7 | 23.8 |
| 08SE258-2  | 49  | 4946  | 0.9 | 11.7987 | 3.1 | 2.6105 | 4.3 | 0.2234 | 3.0 | 0.70 | 1299.7 | 35.5 | 1303.6 | 31.6 | 1309.9 | 59.5 |
| 08SE258-6  | 87  | 7658  | 2.8 | 12.8945 | 1.9 | 2.0316 | 1.9 | 0.1900 | 0.5 | 0.26 | 1121.3 | 5.1  | 1126.1 | 13.1 | 1135.4 | 37.0 |
| 08SE258-7  | 284 | 35216 | 4.4 | 12.7651 | 1.3 | 1.8182 | 1.7 | 0.1683 | 1.2 | 0.67 | 1002.9 | 10.8 | 1052.0 | 11.4 | 1155.5 | 25.8 |
| 08SE258-8  | 132 | 12658 | 1.9 | 11.4320 | 2.0 | 2.3544 | 2.9 | 0.1952 | 2.2 | 0.74 | 1149.5 | 22.8 | 1228.9 | 20.8 | 1370.9 | 37.6 |
| 08SE258-10 | 207 | 9294  | 1.6 | 11.6861 | 2.8 | 1.8364 | 3.5 | 0.1556 | 2.0 | 0.57 | 932.5  | 17.2 | 1058.6 | 22.7 | 1328.5 | 54.8 |
| 08SE258-12 | 251 | 16398 | 2.2 | 12.5497 | 0.6 | 2.0252 | 2.1 | 0.1843 | 2.0 | 0.96 | 1090.6 | 20.1 | 1124.0 | 14.2 | 1189.2 | 11.7 |
| 08SE258-14 | 128 | 7482  | 1.2 | 12.2832 | 3.1 | 2.0477 | 3.6 | 0.1824 | 1.8 | 0.51 | 1080.2 | 18.3 | 1131.5 | 24.8 | 1231.4 | 61.5 |
| 08SE258-16 | 60  | 4280  | 2.8 | 14.4390 | 3.6 | 1.5118 | 3.9 | 0.1583 | 1.4 | 0.37 | 947.5  | 12.7 | 935.2  | 23.7 | 906.4  | 74.1 |
| 08SE258-17 | 104 | 3630  | 8.5 | 13.9376 | 3.7 | 0.9388 | 5.2 | 0.0949 | 3.6 | 0.70 | 584.5  | 20.3 | 672.3  | 25.7 | 978.8  | 76.3 |

Table SD3 (Continued).

| Analysis   | U<br>(ppm) | $^{206}\text{Pb}$<br>$^{204}\text{Pb}$ | U/Th | Isotope ratios      |       |                     |       |                     |       | Error<br>correlation | Isotopic ages (Ma) <sup>§</sup> |       |                     |       |                     |       |
|------------|------------|----------------------------------------|------|---------------------|-------|---------------------|-------|---------------------|-------|----------------------|---------------------------------|-------|---------------------|-------|---------------------|-------|
|            |            |                                        |      | $^{206}\text{Pb}^*$ | $\pm$ | $^{207}\text{Pb}^*$ | $\pm$ | $^{206}\text{Pb}^*$ | $\pm$ |                      | $^{206}\text{Pb}^*$             | $\pm$ | $^{207}\text{Pb}^*$ | $\pm$ | $^{206}\text{Pb}^*$ | $\pm$ |
|            |            |                                        |      | $^{238}\text{U}$    | (%)   | $^{235}\text{U}$    | (%)   | $^{238}\text{U}$    | (%)   |                      | $^{238}\text{U}$                | (Ma)  | $^{235}\text{U}$    | (Ma)  | $^{238}\text{U}$    | (Ma)  |
| 08SE258-18 | 244        | 20862                                  | 3.5  | 9.4863              | 1.4   | 3.7260              | 2.9   | 0.2564              | 2.6   | 0.88                 | 1471.1                          | 33.9  | 1577.0              | 23.4  | 1721.6              | 25.1  |
| 08SE258-19 | 58         | 3292                                   | 1.5  | 13.8593             | 3.4   | 1.5843              | 4.7   | 0.1593              | 3.3   | 0.70                 | 952.6                           | 29.6  | 964.1               | 29.6  | 990.3               | 68.7  |
| 08SE258-20 | 157        | 8776                                   | 2.2  | 13.9653             | 2.0   | 1.4981              | 4.5   | 0.1517              | 4.0   | 0.89                 | 910.7                           | 34.1  | 929.6               | 27.3  | 974.8               | 41.0  |
| 08SE258-22 | 120        | 15696                                  | 1.5  | 9.8347              | 1.8   | 3.7920              | 3.6   | 0.2705              | 3.1   | 0.87                 | 1543.2                          | 43.1  | 1591.1              | 29.1  | 1655.0              | 33.4  |
| 08SE258-23 | 199        | 14062                                  | 2.3  | 12.4518             | 1.2   | 2.2924              | 2.1   | 0.2070              | 1.7   | 0.81                 | 1212.9                          | 18.7  | 1209.9              | 14.7  | 1204.6              | 23.7  |
| 08SE258-24 | 1140       | 12760                                  | 7.6  | 8.6124              | 1.7   | 0.8591              | 1.8   | 0.0537              | 0.8   | 0.41                 | 337.0                           | 2.5   | 629.6               | 8.6   | 1897.2              | 30.0  |
| 08SE258-26 | 968        | 2264                                   | 14.4 | 19.1252             | 7.8   | 0.1027              | 8.0   | 0.0142              | 1.9   | 0.23                 | 91.2                            | 1.7   | 99.3                | 7.6   | 298.0               | 178.0 |
| 08SE258-27 | 228        | 15472                                  | 1.2  | 10.2042             | 1.8   | 2.7377              | 5.5   | 0.2026              | 5.2   | 0.95                 | 1189.3                          | 56.6  | 1338.8              | 40.9  | 1586.4              | 33.1  |
| 08SE258-28 | 135        | 8460                                   | 2.4  | 11.1740             | 1.8   | 2.1539              | 5.0   | 0.1746              | 4.6   | 0.94                 | 1037.2                          | 44.5  | 1166.3              | 34.4  | 1414.7              | 33.5  |
| 08SE258-29 | 282        | 10044                                  | 4.2  | 13.2570             | 1.8   | 0.9981              | 2.8   | 0.0960              | 2.2   | 0.79                 | 590.7                           | 12.6  | 702.8               | 14.4  | 1080.0              | 35.1  |
| 08SE258-30 | 53         | 3376                                   | 2.8  | 14.0305             | 3.8   | 1.6010              | 4.4   | 0.1629              | 2.3   | 0.52                 | 973.0                           | 20.6  | 970.6               | 27.5  | 965.3               | 76.7  |
| 08SE258-31 | 255        | 16216                                  | 3.8  | 13.6532             | 1.5   | 1.4798              | 4.2   | 0.1465              | 3.9   | 0.93                 | 881.5                           | 32.5  | 922.1               | 25.6  | 1020.7              | 31.0  |
| 08SE258-33 | 99         | 11226                                  | 2.3  | 13.3051             | 2.6   | 1.6782              | 3.7   | 0.1619              | 2.6   | 0.71                 | 967.5                           | 23.2  | 1000.3              | 23.3  | 1072.8              | 52.1  |
| 08SE258-34 | 115        | 11842                                  | 1.4  | 11.3817             | 1.6   | 2.6084              | 2.9   | 0.2153              | 2.4   | 0.84                 | 1257.1                          | 27.8  | 1303.0              | 21.3  | 1379.4              | 30.3  |
| 08SE258-36 | 137        | 15504                                  | 2.5  | 9.6827              | 1.8   | 3.3629              | 2.3   | 0.2362              | 1.4   | 0.61                 | 1366.7                          | 17.2  | 1495.8              | 17.9  | 1683.8              | 33.5  |
| 08SE258-37 | 133        | 12298                                  | 2.0  | 13.6221             | 2.5   | 1.6364              | 3.1   | 0.1617              | 1.8   | 0.58                 | 966.0                           | 15.9  | 984.3               | 19.4  | 1025.3              | 50.8  |
| 08SE258-39 | 199        | 8210                                   | 2.6  | 13.5975             | 4.4   | 0.8548              | 4.7   | 0.0843              | 1.6   | 0.35                 | 521.7                           | 8.1   | 627.3               | 21.9  | 1028.9              | 88.8  |
| 08SE258-41 | 100        | 7258                                   | 1.9  | 11.6176             | 1.9   | 2.1114              | 6.2   | 0.1779              | 5.9   | 0.95                 | 1055.5                          | 57.3  | 1152.5              | 42.6  | 1339.9              | 37.1  |
| 08SE258-42 | 160        | 17888                                  | 1.7  | 9.9873              | 2.0   | 3.4628              | 4.8   | 0.2508              | 4.4   | 0.91                 | 1442.8                          | 56.8  | 1518.8              | 38.1  | 1626.4              | 37.8  |
| 08SE258-43 | 251        | 11282                                  | 2.8  | 12.8443             | 1.9   | 1.7125              | 2.0   | 0.1595              | 0.5   | 0.25                 | 954.2                           | 4.4   | 1013.2              | 12.7  | 1143.2              | 38.1  |
| 08SE258-44 | 77         | 4916                                   | 1.3  | 11.4509             | 3.3   | 2.2441              | 4.1   | 0.1864              | 2.5   | 0.59                 | 1101.7                          | 24.9  | 1194.9              | 29.1  | 1367.8              | 64.2  |
| 08SE258-45 | 90         | 10352                                  | 3.5  | 8.2312              | 1.4   | 4.5579              | 2.4   | 0.2721              | 1.9   | 0.80                 | 1551.5                          | 26.2  | 1741.6              | 19.8  | 1978.2              | 25.3  |
| 08SE258-46 | 135        | 6280                                   | 3.4  | 13.7631             | 2.8   | 0.9446              | 2.9   | 0.0943              | 0.7   | 0.23                 | 580.8                           | 3.7   | 675.3               | 14.2  | 1004.4              | 56.8  |
| 08SE258-47 | 141        | 16576                                  | 2.2  | 10.8811             | 0.7   | 2.6273              | 2.8   | 0.2073              | 2.7   | 0.97                 | 1214.6                          | 30.0  | 1308.3              | 20.6  | 1465.4              | 13.7  |
| 08SE258-49 | 278        | 18638                                  | 1.0  | 13.1149             | 1.5   | 1.4717              | 1.8   | 0.1400              | 1.0   | 0.56                 | 844.6                           | 8.2   | 918.8               | 11.2  | 1101.6              | 30.5  |
| 08SE258-51 | 115        | 15134                                  | 2.6  | 13.8899             | 2.4   | 1.6051              | 3.2   | 0.1617              | 2.2   | 0.67                 | 966.2                           | 19.3  | 972.2               | 20.0  | 985.8               | 48.1  |
| 08SE258-53 | 338        | 23874                                  | 3.0  | 13.0625             | 0.9   | 1.5216              | 2.2   | 0.1441              | 2.0   | 0.91                 | 868.1                           | 16.0  | 939.1               | 13.3  | 1109.6              | 18.2  |
| 08SE258-54 | 47         | 8574                                   | 2.4  | 13.3361             | 3.1   | 1.8425              | 3.7   | 0.1782              | 2.0   | 0.53                 | 1057.2                          | 19.2  | 1060.7              | 24.3  | 1068.1              | 62.7  |
| 08SE258-55 | 619        | 12174                                  | 3.8  | 10.2612             | 1.7   | 1.2946              | 4.1   | 0.0963              | 3.7   | 0.91                 | 593.0                           | 21.1  | 843.4               | 23.5  | 1576.0              | 32.6  |
| 08SE258-56 | 278        | 19228                                  | 2.0  | 13.0136             | 2.4   | 1.7228              | 3.3   | 0.1626              | 2.3   | 0.70                 | 971.2                           | 21.1  | 1017.1              | 21.3  | 1117.1              | 47.0  |
| 08SE258-57 | 443        | 32844                                  | 2.2  | 11.8050             | 2.3   | 2.1144              | 3.8   | 0.1810              | 3.1   | 0.80                 | 1072.6                          | 30.3  | 1153.5              | 26.5  | 1308.9              | 44.8  |
| 08SE258-58 | 177        | 26776                                  | 3.5  | 9.4014              | 0.6   | 4.3236              | 0.8   | 0.2948              | 0.6   | 0.69                 | 1665.5                          | 8.4   | 1697.9              | 6.8   | 1738.1              | 11.1  |
| 08SE258-60 | 204        | 20436                                  | 2.2  | 10.9353             | 1.7   | 2.6617              | 2.0   | 0.2111              | 1.2   | 0.57                 | 1234.7                          | 13.0  | 1317.9              | 14.9  | 1455.9              | 31.4  |
| 08SE258-62 | 335        | 29702                                  | 4.0  | 9.1349              | 2.1   | 4.0210              | 2.4   | 0.2664              | 1.1   | 0.46                 | 1522.5                          | 14.8  | 1638.4              | 19.1  | 1790.6              | 37.9  |
| 08SE258-63 | 217        | 15544                                  | 2.3  | 13.4461             | 1.6   | 1.6676              | 1.9   | 0.1626              | 1.0   | 0.53                 | 971.3                           | 8.9   | 996.3               | 11.9  | 1051.6              | 32.2  |
| 08SE258-64 | 319        | 32066                                  | 4.5  | 13.0895             | 1.8   | 1.5322              | 2.1   | 0.1455              | 1.2   | 0.55                 | 875.5                           | 9.6   | 943.4               | 13.2  | 1105.5              | 35.9  |
| 08SE258-65 | 89         | 10414                                  | 2.6  | 11.5233             | 2.0   | 2.5467              | 2.9   | 0.2128              | 2.2   | 0.74                 | 1244.0                          | 24.8  | 1285.5              | 21.5  | 1355.6              | 38.0  |
| 08SE258-66 | 53         | 6744                                   | 1.4  | 10.9537             | 1.7   | 2.8138              | 10.0  | 0.2235              | 9.9   | 0.99                 | 1300.5                          | 116.1 | 1359.2              | 75.1  | 1452.7              | 32.2  |
| 08SE258-67 | 160        | 9428                                   | 2.0  | 12.8409             | 4.6   | 1.6561              | 5.4   | 0.1542              | 2.7   | 0.51                 | 924.7                           | 23.6  | 991.9               | 34.1  | 1143.7              | 92.2  |
| 08SE258-68 | 180        | 6412                                   | 11.8 | 11.3547             | 2.9   | 1.0436              | 3.6   | 0.0859              | 2.2   | 0.60                 | 531.5                           | 11.0  | 725.7               | 18.5  | 1384.0              | 54.8  |
| 08SE258-70 | 70         | 4080                                   | 1.5  | 12.1245             | 2.4   | 2.2499              | 3.2   | 0.1978              | 2.1   | 0.65                 | 1163.7                          | 21.8  | 1196.8              | 22.3  | 1256.9              | 47.2  |
| 08SE258-72 | 176        | 10548                                  | 2.3  | 11.6376             | 2.0   | 2.2978              | 3.0   | 0.1939              | 2.3   | 0.76                 | 1142.7                          | 24.1  | 1211.6              | 21.5  | 1336.6              | 38.3  |
| 08SE258-74 | 72         | 7086                                   | 3.0  | 11.2651             | 2.7   | 2.8418              | 3.2   | 0.2322              | 1.8   | 0.54                 | 1345.9                          | 21.4  | 1366.7              | 24.3  | 1399.2              | 52.1  |
| 08SE258-75 | 794        | 20360                                  | 6.7  | 14.0226             | 1.7   | 0.9539              | 3.3   | 0.0970              | 2.8   | 0.85                 | 596.9                           | 16.2  | 680.1               | 16.5  | 966.4               | 35.4  |
| 08SE258-77 | 123        | 16042                                  | 2.0  | 11.1722             | 4.0   | 2.9360              | 4.1   | 0.2379              | 0.8   | 0.20                 | 1375.8                          | 10.0  | 1391.2              | 30.8  | 1415.0              | 76.2  |
| 08SE258-78 | 165        | 7582                                   | 1.6  | 13.2823             | 3.4   | 1.3148              | 7.2   | 0.1267              | 6.4   | 0.88                 | 768.8                           | 46.2  | 852.3               | 41.7  | 1076.2              | 68.3  |
| 08SE258-79 | 283        | 14836                                  | 4.2  | 13.7996             | 3.9   | 1.4289              | 6.3   | 0.1430              | 4.9   | 0.78                 | 861.6                           | 39.4  | 901.1               | 37.5  | 999.0               | 79.9  |
| 08SE258-81 | 144        | 10176                                  | 2.0  | 13.6226             | 3.5   | 1.4599              | 4.2   | 0.1442              | 2.3   | 0.55                 | 868.6                           | 18.8  | 914.0               | 25.4  | 1025.2              | 71.3  |
| 08SE258-83 | 376        | 26686                                  | 4.3  | 13.2226             | 1.7   | 1.5159              | 3.9   | 0.1454              | 3.5   | 0.90                 | 875.0                           | 28.4  | 936.8               | 23.7  | 1085.2              | 34.1  |
| 08SE258-86 | 83         | 7710                                   | 3.5  | 13.9911             | 2.2   | 1.6431              | 2.3   | 0.1667              | 0.7   | 0.32                 | 994.1                           | 6.6   | 986.9               | 14.4  | 971.0               | 44.2  |
| 08SE258-87 | 39         | 4344                                   | 2.0  | 12.9255             | 2.0   | 2.0476              | 2.2   | 0.1920              | 0.8   | 0.36                 | 1131.9                          | 8.2   | 1131.5              | 14.9  | 1130.6              | 40.7  |
| 08SE258-88 | 412        | 32162                                  | 2.2  | 13.2269             | 1.4   | 1.8049              | 1.8   | 0.1731              | 1.1   | 0.61                 | 1029.4                          | 10.3  | 1047.2              | 11.5  | 1084.6              | 27.9  |
| 08SE258-89 | 144        | 18390                                  | 2.8  | 10.8588             | 1.0   | 3.1179              | 1.1   | 0.2456              | 0.5   | 0.44                 | 1415.5                          | 6.4   | 1437.1              | 8.8   | 1469.2              | 19.6  |
| 08SE258-91 | 123        | 10504                                  | 3.7  | 13.5099             | 2.4   | 1.7269              | 3.0   | 0.1692              | 1.8   | 0.60                 | 1007.8                          | 16.6  | 1018.6              | 19.1  | 1042.0              | 48.0  |
| 08SE258-92 | 467        | 24924                                  | 1.8  | 13.3458             | 2.2   | 1.3544              | 4.6   | 0.1311              | 4.0   | 0.88                 | 794.1                           | 30.2  | 869.5               | 26.9  | 1066.6              | 44.7  |
| 08SE258-93 | 308        | 16912                                  | 2.1  | 12.1116             | 1.6   | 1.8614              | 2.2   | 0.1635              | 1.5   | 0.69                 | 976.2                           | 13.4  | 1067.5              | 14.3  | 1259.0              | 30.7  |
| 08SE258-94 | 116        | 17460                                  | 2.3  | 11.3410             | 4.6   | 2.5638              | 9.9   | 0.2109              | 8.8   | 0.89                 | 1233.5                          | 98.6  | 1290.4              | 72.5  | 1386.3              | 88.2  |
| 08SE258-95 | 83         | 9408                                   | 2.0  | 12.9937             | 1.4   | 1.9672              | 2.7   | 0.1854              | 2.3   | 0.86                 | 1096.3                          | 23.2  | 1104.4              | 18.0  | 1120.2              | 27.0  |
| 08SE258-97 | 78         | 6190                                   | 1.7  | 13.4889             | 2.1   | 1.7651              | 3.0   | 0.1727              | 2.1   | 0.72                 | 1026.9                          | 20.2  | 1032.7              | 19.2  | 1045.2              | 41.5  |
| 08SE258-98 | 264        | 18114                                  | 2.0  | 13.4423             | 1.2   | 1.5999              | 2.1   | 0.1560              | 1.7   | 0.81                 | 934.4                           | 15.1  | 970.2               | 13.4  | 1052.1              | 25.2  |

Table SD3 (Continued).

| Analysis                                                    | U<br>(ppm) | $^{206}\text{Pb}$<br>$^{204}\text{Pb}$ | U/Th | Isotope ratios      |       |                     |       |                     |       | Error<br>correlation | Isotopic ages (Ma) <sup>§</sup> |       |                     |       |                     |       |
|-------------------------------------------------------------|------------|----------------------------------------|------|---------------------|-------|---------------------|-------|---------------------|-------|----------------------|---------------------------------|-------|---------------------|-------|---------------------|-------|
|                                                             |            |                                        |      | $^{206}\text{Pb}^*$ | $\pm$ | $^{207}\text{Pb}^*$ | $\pm$ | $^{206}\text{Pb}^*$ | $\pm$ |                      | $^{206}\text{Pb}^*$             | $\pm$ | $^{207}\text{Pb}^*$ | $\pm$ | $^{206}\text{Pb}^*$ | $\pm$ |
|                                                             |            |                                        |      | $^{207}\text{Pb}^*$ | (%)   | $^{235}\text{U}^*$  | (%)   | $^{238}\text{U}$    | (%)   |                      | $^{238}\text{U}$                | (Ma)  | $^{235}\text{U}^*$  | (Ma)  | $^{207}\text{Pb}^*$ | (Ma)  |
| 08SE258-100                                                 | 134        | 6870                                   | 1.8  | 13.0608             | 2.3   | 1.6753              | 4.7   | 0.1587              | 4.1   | 0.87                 | 949.5                           | 36.1  | 999.2               | 29.7  | 1109.9              | 45.2  |
| 08SE258-101                                                 | 76         | 13320                                  | 2.5  | 13.3619             | 1.4   | 1.6836              | 2.8   | 0.1632              | 2.4   | 0.87                 | 974.3                           | 22.0  | 1002.3              | 17.7  | 1064.2              | 27.4  |
| 08SE258-102                                                 | 204        | 25022                                  | 3.5  | 10.9764             | 1.9   | 2.9363              | 2.2   | 0.2338              | 1.2   | 0.55                 | 1354.2                          | 14.8  | 1391.3              | 16.8  | 1448.8              | 35.4  |
| 08SE259-4                                                   | 100        | 12056                                  | 2.7  | 13.6229             | 1.5   | 1.7410              | 1.9   | 0.1720              | 1.1   | 0.59                 | 1023.2                          | 10.4  | 1023.9              | 12.1  | 1025.2              | 30.8  |
| 08SE259-18                                                  | 139        | 22904                                  | 2.6  | 12.8851             | 1.7   | 2.0793              | 2.6   | 0.1943              | 2.0   | 0.76                 | 1144.7                          | 20.9  | 1142.0              | 17.9  | 1136.9              | 33.5  |
| 08SE259-19                                                  | 90         | 23530                                  | 2.1  | 9.6541              | 1.4   | 4.0604              | 3.0   | 0.2843              | 2.7   | 0.89                 | 1613.0                          | 38.1  | 1646.4              | 24.6  | 1689.3              | 25.8  |
| 08SE259-22                                                  | 135        | 9560                                   | 3.0  | 13.5090             | 2.9   | 1.7839              | 3.5   | 0.1748              | 1.9   | 0.55                 | 1038.4                          | 18.1  | 1039.6              | 22.5  | 1042.1              | 58.3  |
| 08SE259-24                                                  | 336        | 46496                                  | 1.0  | 12.5782             | 1.3   | 2.1895              | 1.4   | 0.1997              | 0.5   | 0.36                 | 1173.9                          | 5.4   | 1177.7              | 9.6   | 1184.7              | 25.3  |
| 08SE259-27                                                  | 29         | 11840                                  | 1.0  | 5.3090              | 1.2   | 13.2849             | 1.4   | 0.5115              | 0.7   | 0.51                 | 2663.1                          | 15.9  | 2700.1              | 13.6  | 2727.9              | 20.5  |
| 08SE259-36                                                  | 1327       | 13340                                  | 5.9  | 14.8824             | 1.8   | 0.4843              | 1.8   | 0.0523              | 0.5   | 0.27                 | 328.4                           | 1.6   | 401.0               | 6.1   | 843.7               | 36.6  |
| 08SE259-41                                                  | 686        | 13862                                  | 19.4 | 6.7169              | 2.1   | 0.8071              | 6.9   | 0.0393              | 6.6   | 0.95                 | 248.6                           | 16.1  | 600.8               | 31.4  | 2333.1              | 35.8  |
| 08SE259-43                                                  | 893        | 52338                                  | 4.8  | 13.7240             | 2.2   | 0.8806              | 3.7   | 0.0877              | 3.0   | 0.81                 | 541.6                           | 15.7  | 641.3               | 17.6  | 1010.2              | 43.6  |
| 08SE259-45                                                  | 109        | 16270                                  | 3.7  | 12.9742             | 1.9   | 2.0296              | 2.0   | 0.1910              | 0.5   | 0.25                 | 1126.7                          | 5.2   | 1125.5              | 13.4  | 1123.2              | 38.0  |
| 08SE259-48                                                  | 235        | 15372                                  | 6.7  | 13.7903             | 2.6   | 0.8683              | 4.3   | 0.0868              | 3.4   | 0.80                 | 536.8                           | 17.6  | 634.6               | 20.2  | 1000.4              | 52.6  |
| 08SE259-52                                                  | 286        | 16492                                  | 3.8  | 13.4869             | 1.4   | 0.8178              | 3.8   | 0.0800              | 3.5   | 0.93                 | 496.1                           | 16.8  | 606.8               | 17.3  | 1045.5              | 29.0  |
| 08SE259-55                                                  | 161        | 11552                                  | 3.7  | 12.0842             | 1.5   | 0.7237              | 10.0  | 0.0634              | 9.9   | 0.99                 | 396.4                           | 37.9  | 552.8               | 42.6  | 1263.4              | 29.9  |
| 08SE259-56                                                  | 665        | 42226                                  | 41.4 | 11.9859             | 1.4   | 0.9073              | 2.8   | 0.0789              | 2.4   | 0.87                 | 489.4                           | 11.4  | 655.6               | 13.4  | 1279.3              | 26.7  |
| 08SE259-60                                                  | 115        | 27974                                  | 2.0  | 10.9233             | 1.2   | 3.2169              | 1.6   | 0.2549              | 1.1   | 0.66                 | 1463.5                          | 14.0  | 1461.2              | 12.6  | 1458.0              | 23.4  |
| 08SE259-61                                                  | 199        | 4762                                   | 7.1  | 14.8741             | 2.6   | 0.4443              | 3.2   | 0.0479              | 1.9   | 0.58                 | 301.8                           | 5.5   | 373.3               | 10.0  | 844.9               | 54.2  |
| 08SE259-68                                                  | 1291       | 10710                                  | 5.7  | 15.0075             | 1.7   | 0.3761              | 1.8   | 0.0409              | 0.6   | 0.35                 | 258.6                           | 1.6   | 324.2               | 5.1   | 826.3               | 35.7  |
| 08SE259-71                                                  | 53         | 7574                                   | 1.8  | 13.7503             | 1.5   | 1.6376              | 3.4   | 0.1633              | 3.1   | 0.90                 | 975.2                           | 27.9  | 984.8               | 21.5  | 1006.3              | 29.6  |
| 08SE259-86                                                  | 98         | 7490                                   | 4.2  | 13.8498             | 3.7   | 0.8261              | 4.5   | 0.0830              | 2.6   | 0.58                 | 513.9                           | 12.9  | 611.4               | 20.8  | 991.7               | 75.2  |
| 08SE259-87                                                  | 765        | 12156                                  | 14.9 | 10.9478             | 2.9   | 0.5478              | 7.9   | 0.0435              | 7.4   | 0.93                 | 274.5                           | 19.8  | 443.6               | 28.4  | 1453.7              | 55.8  |
| 08SE259-91                                                  | 302        | 11370                                  | 4.6  | 13.3472             | 1.7   | 0.8381              | 3.4   | 0.0811              | 2.9   | 0.87                 | 502.9                           | 14.2  | 618.1               | 15.7  | 1066.4              | 33.7  |
| 08SE259-93                                                  | 175        | 4558                                   | 3.8  | 14.0903             | 2.7   | 0.5419              | 7.4   | 0.0554              | 6.9   | 0.93                 | 347.5                           | 23.2  | 439.7               | 26.3  | 956.6               | 54.9  |
| 08SE259-94                                                  | 216        | 7724                                   | 2.0  | 13.5396             | 2.1   | 0.8272              | 6.4   | 0.0812              | 6.1   | 0.95                 | 503.4                           | 29.3  | 612.0               | 29.5  | 1037.6              | 42.0  |
| 08SE259-95                                                  | 1213       | 8156                                   | 12.7 | 8.5735              | 3.6   | 0.5937              | 5.4   | 0.0369              | 4.1   | 0.75                 | 233.7                           | 9.3   | 473.2               | 20.5  | 1905.3              | 64.3  |
| 08SE259-96                                                  | 122        | 29350                                  | 1.3  | 9.7289              | 2.0   | 4.1710              | 2.1   | 0.2943              | 0.5   | 0.24                 | 1663.0                          | 7.3   | 1668.3              | 16.9  | 1675.0              | 37.0  |
| 08SE259-97                                                  | 424        | 30120                                  | 4.6  | 10.6342             | 2.6   | 1.1457              | 7.6   | 0.0884              | 7.1   | 0.94                 | 545.9                           | 37.3  | 775.2               | 41.1  | 1508.8              | 49.3  |
| 08SE259-98                                                  | 272        | 9764                                   | 6.1  | 11.0179             | 3.4   | 0.6884              | 5.4   | 0.0550              | 4.1   | 0.77                 | 345.2                           | 13.9  | 531.9               | 22.2  | 1441.6              | 64.8  |
| 08SE259-100                                                 | 96         | 14756                                  | 3.7  | 13.5837             | 1.7   | 1.7648              | 2.0   | 0.1739              | 1.1   | 0.56                 | 1033.4                          | 10.7  | 1032.6              | 13.0  | 1031.0              | 33.5  |
| 08SE259-101                                                 | 191        | 27982                                  | 3.6  | 13.2337             | 1.9   | 1.8603              | 2.9   | 0.1786              | 2.2   | 0.75                 | 1059.1                          | 21.2  | 1067.1              | 19.0  | 1083.5              | 37.9  |
| <i>Sample 08TC44 Tylerhorse Canyon pendant metatubidite</i> |            |                                        |      |                     |       |                     |       |                     |       |                      |                                 |       |                     |       |                     |       |
| 08TC44-1                                                    | 456        | 8160                                   | 1.1  | 18.0017             | 17.3  | 0.3577              | 17.3  | 0.0467              | 0.5   | 0.03                 | 294.2                           | 1.4   | 310.5               | 46.3  | 434.4               | 387.4 |
| 08TC44-2                                                    | 171        | 6546                                   | 0.9  | 18.2659             | 1.7   | 0.5203              | 1.8   | 0.0689              | 0.5   | 0.28                 | 429.7                           | 2.1   | 425.3               | 6.1   | 401.9               | 37.8  |
| 08TC44-3                                                    | 219        | 8428                                   | 1.8  | 12.9641             | 1.7   | 1.8155              | 1.8   | 0.1707              | 0.5   | 0.28                 | 1016.0                          | 4.7   | 1051.1              | 11.8  | 1124.7              | 34.6  |
| 08TC44-5                                                    | 429        | 12950                                  | 3.0  | 18.0528             | 1.6   | 0.4933              | 1.6   | 0.0646              | 0.5   | 0.31                 | 403.4                           | 2.0   | 407.1               | 5.5   | 428.1               | 34.7  |
| 08TC44-6                                                    | 153        | 22418                                  | 2.7  | 11.2272             | 1.4   | 2.9119              | 1.5   | 0.2371              | 0.6   | 0.37                 | 1371.6                          | 6.9   | 1385.0              | 11.5  | 1405.6              | 27.0  |
| 08TC44-7                                                    | 210        | 20748                                  | 2.9  | 13.4397             | 0.9   | 1.7736              | 1.3   | 0.1729              | 1.0   | 0.72                 | 1027.9                          | 9.2   | 1035.8              | 8.7   | 1052.5              | 18.6  |
| 08TC44-11                                                   | 230        | 7052                                   | 1.4  | 20.0740             | 4.4   | 0.2765              | 4.6   | 0.0403              | 1.0   | 0.22                 | 254.4                           | 2.5   | 247.8               | 10.0  | 186.4               | 103.6 |
| 08TC44-13                                                   | 298        | 12978                                  | 1.5  | 17.7272             | 1.6   | 0.5847              | 1.7   | 0.0752              | 0.5   | 0.30                 | 467.2                           | 2.3   | 467.5               | 6.2   | 468.6               | 35.2  |
| 08TC44-14                                                   | 98         | 13732                                  | 1.5  | 10.9931             | 1.9   | 3.1290              | 2.0   | 0.2495              | 0.6   | 0.31                 | 1435.8                          | 7.9   | 1439.8              | 15.0  | 1445.9              | 35.3  |
| 08TC44-16                                                   | 175        | 20370                                  | 0.9  | 10.7375             | 2.0   | 3.3717              | 2.8   | 0.2626              | 2.0   | 0.70                 | 1503.0                          | 26.1  | 1497.8              | 21.8  | 1490.6              | 37.7  |
| 08TC44-17                                                   | 72         | 11922                                  | 1.2  | 7.9934              | 1.7   | 6.2376              | 1.8   | 0.3616              | 0.6   | 0.32                 | 1989.8                          | 9.8   | 2009.7              | 15.6  | 2030.3              | 29.9  |
| 08TC44-18                                                   | 464        | 38288                                  | 3.9  | 12.7815             | 1.7   | 1.9976              | 2.4   | 0.1852              | 1.7   | 0.71                 | 1095.2                          | 17.2  | 1114.7              | 16.3  | 1152.9              | 33.8  |
| 08TC44-20                                                   | 91         | 19474                                  | 1.5  | 9.9343              | 1.3   | 4.0442              | 1.8   | 0.2914              | 1.3   | 0.72                 | 1648.5                          | 19.3  | 1643.1              | 15.0  | 1636.3              | 23.8  |
| 08TC44-21                                                   | 690        | 73042                                  | 3.1  | 12.1624             | 2.9   | 2.2597              | 3.1   | 0.1993              | 1.2   | 0.39                 | 1171.7                          | 13.0  | 1199.8              | 21.9  | 1250.8              | 56.2  |
| 08TC44-22                                                   | 80         | 8276                                   | 1.6  | 13.3230             | 1.2   | 1.8648              | 1.3   | 0.1802              | 0.5   | 0.39                 | 1068.0                          | 4.9   | 1068.7              | 8.4   | 1070.1              | 23.5  |
| 08TC44-23                                                   | 350        | 34642                                  | 1.3  | 10.8674             | 1.8   | 3.2305              | 2.1   | 0.2546              | 1.0   | 0.48                 | 1462.2                          | 12.8  | 1464.5              | 15.9  | 1467.7              | 34.2  |
| 08TC44-24                                                   | 193        | 37912                                  | 1.5  | 10.4438             | 0.8   | 3.5185              | 1.2   | 0.2665              | 0.9   | 0.75                 | 1523.1                          | 12.3  | 1531.4              | 9.6   | 1542.9              | 15.2  |
| 08TC44-25                                                   | 349        | 2192                                   | 1.3  | 15.5034             | 15.9  | 0.3696              | 15.9  | 0.0416              | 0.6   | 0.04                 | 262.5                           | 1.6   | 319.3               | 43.6  | 758.1               | 337.1 |
| 08TC44-26                                                   | 154        | 2626                                   | 0.9  | 20.2025             | 5.0   | 0.2555              | 5.0   | 0.0374              | 0.8   | 0.15                 | 236.9                           | 1.7   | 231.1               | 10.4  | 171.5               | 116.1 |
| 08TC44-27                                                   | 264        | 9204                                   | 1.6  | 19.0078             | 2.7   | 0.3993              | 2.8   | 0.0551              | 1.0   | 0.34                 | 345.5                           | 3.2   | 341.2               | 8.2   | 312.0               | 60.7  |
| 08TC44-30                                                   | 163        | 28836                                  | 1.4  | 9.7486              | 0.9   | 3.9547              | 1.7   | 0.2796              | 1.5   | 0.84                 | 1589.4                          | 20.4  | 1624.9              | 13.9  | 1671.3              | 17.1  |
| 08TC44-31                                                   | 67         | 4124                                   | 1.1  | 17.2617             | 3.6   | 0.7747              | 4.7   | 0.0970              | 2.9   | 0.62                 | 596.8                           | 16.5  | 582.5               | 20.6  | 527.2               | 80.0  |
| 08TC44-32                                                   | 353        | 58108                                  | 5.8  | 10.0634             | 1.3   | 3.7269              | 1.7   | 0.2720              | 1.1   | 0.64                 | 1551.0                          | 15.4  | 1577.2              | 14.0  | 1612.3              | 25.0  |
| 08TC44-33                                                   | 497        | 12644                                  | 4.0  | 18.9669             | 3.2   | 0.3159              | 4.4   | 0.0435              | 3.1   | 0.69                 | 274.2                           | 8.3   | 278.7               | 10.8  | 316.9               | 72.8  |
| 08TC44-34                                                   | 245        | 42834                                  | 2.7  | 9.2508              | 0.8   | 4.4477              | 1.7   | 0.2984              | 1.5   | 0.90                 | 1683.4                          | 22.5  | 1721.3              | 14.1  | 1767.6              | 13.7  |
| 08TC44-35                                                   | 626        | 57014                                  | 2.4  | 11.9662             | 0.8   | 2.4094              | 1.5   | 0.2091              | 1.3   | 0.85                 | 1224.1                          | 13.9  | 1245.4              | 10.5  | 1282.5              | 15.0  |

| Analysis   | U<br>(ppm) | <sup>206</sup> Pb/<br><sup>204</sup> Pb | U/Th | Isotope ratios                            |      |                                          |      |                                         |     | Error<br>correlation | Isotopic ages (Ma) <sup>§</sup>         |      |                                          |      |                                           |       |
|------------|------------|-----------------------------------------|------|-------------------------------------------|------|------------------------------------------|------|-----------------------------------------|-----|----------------------|-----------------------------------------|------|------------------------------------------|------|-------------------------------------------|-------|
|            |            |                                         |      | <sup>206</sup> Pb*/<br><sup>207</sup> Pb* | ±    | <sup>207</sup> Pb*/<br><sup>235</sup> U* | ±    | <sup>206</sup> Pb*/<br><sup>238</sup> U | ±   |                      | <sup>206</sup> Pb*/<br><sup>238</sup> U | ±    | <sup>207</sup> Pb*/<br><sup>235</sup> U* | ±    | <sup>206</sup> Pb*/<br><sup>207</sup> Pb* | ±     |
|            |            |                                         |      | (%)                                       | (%)  | (%)                                      | (%)  | (%)                                     | (%) |                      | (Ma)                                    | (Ma) | (Ma)                                     | (Ma) | (Ma)                                      | (Ma)  |
| 08TC44-36  | 116        | 10422                                   | 3.4  | 13.6527                                   | 1.0  | 1.5920                                   | 1.1  | 0.1576                                  | 0.5 | 0.46                 | 943.6                                   | 4.4  | 967.1                                    | 6.8  | 1020.7                                    | 19.8  |
| 08TC44-37  | 115        | 9016                                    | 0.8  | 12.6894                                   | 1.3  | 2.1015                                   | 2.7  | 0.1934                                  | 2.3 | 0.88                 | 1139.8                                  | 24.4 | 1149.3                                   | 18.3 | 1167.2                                    | 24.9  |
| 08TC44-38  | 529        | 7014                                    | 0.8  | 16.7718                                   | 5.0  | 0.5719                                   | 5.5  | 0.0696                                  | 2.2 | 0.40                 | 433.6                                   | 9.1  | 459.3                                    | 20.2 | 590.0                                     | 109.1 |
| 08TC44-39  | 630        | 16816                                   | 5.7  | 16.7460                                   | 1.7  | 0.6009                                   | 5.7  | 0.0730                                  | 5.4 | 0.95                 | 454.1                                   | 23.7 | 477.8                                    | 21.6 | 593.3                                     | 36.6  |
| 08TC44-40  | 148        | 6012                                    | 1.5  | 18.8926                                   | 3.2  | 0.4234                                   | 3.4  | 0.0580                                  | 1.3 | 0.39                 | 363.6                                   | 4.7  | 358.5                                    | 10.4 | 325.8                                     | 72.0  |
| 08TC44-42  | 107        | 31712                                   | 1.5  | 5.9921                                    | 0.9  | 10.9984                                  | 1.5  | 0.4780                                  | 1.2 | 0.81                 | 2518.4                                  | 24.6 | 2523.0                                   | 13.5 | 2526.6                                    | 14.3  |
| 08TC44-43  | 128        | 11686                                   | 0.8  | 11.8593                                   | 1.1  | 2.4106                                   | 1.3  | 0.2073                                  | 0.7 | 0.52                 | 1214.7                                  | 7.7  | 1245.8                                   | 9.6  | 1300.0                                    | 22.1  |
| 08TC44-44  | 630        | 12948                                   | 2.5  | 17.8202                                   | 1.3  | 0.4732                                   | 2.7  | 0.0612                                  | 2.4 | 0.88                 | 382.7                                   | 8.8  | 393.4                                    | 8.8  | 457.0                                     | 28.8  |
| 08TC44-46  | 286        | 8834                                    | 1.8  | 18.8847                                   | 2.6  | 0.4099                                   | 2.6  | 0.0561                                  | 0.6 | 0.22                 | 352.1                                   | 2.0  | 348.8                                    | 7.7  | 326.8                                     | 58.1  |
| 08TC44-47  | 307        | 14710                                   | 1.1  | 17.7691                                   | 1.2  | 0.5866                                   | 1.3  | 0.0756                                  | 0.5 | 0.40                 | 469.8                                   | 2.4  | 468.7                                    | 5.0  | 463.4                                     | 26.9  |
| 08TC44-50  | 1029       | 4034                                    | 2.2  | 16.3418                                   | 10.4 | 0.3921                                   | 10.6 | 0.0465                                  | 1.9 | 0.18                 | 292.8                                   | 5.4  | 335.9                                    | 30.4 | 646.0                                     | 225.1 |
| 08TC44-52  | 184        | 24834                                   | 1.0  | 9.8875                                    | 1.0  | 3.8968                                   | 2.2  | 0.2794                                  | 2.0 | 0.90                 | 1588.6                                  | 28.3 | 1613.0                                   | 18.0 | 1645.1                                    | 17.8  |
| 08TC44-53  | 166        | 6762                                    | 1.3  | 19.0602                                   | 3.2  | 0.4264                                   | 3.6  | 0.0589                                  | 1.6 | 0.45                 | 369.2                                   | 5.9  | 360.6                                    | 11.0 | 305.8                                     | 73.8  |
| 08TC44-54  | 141        | 8818                                    | 1.2  | 16.7529                                   | 2.8  | 0.7245                                   | 3.4  | 0.0880                                  | 2.0 | 0.58                 | 543.9                                   | 10.2 | 553.3                                    | 14.4 | 592.4                                     | 59.7  |
| 08TC44-55  | 230        | 33768                                   | 0.6  | 8.1292                                    | 2.1  | 5.9873                                   | 2.6  | 0.3530                                  | 1.5 | 0.57                 | 1948.9                                  | 24.6 | 1974.0                                   | 22.5 | 2000.4                                    | 37.8  |
| 08TC44-58  | 1208       | 3414                                    | 3.9  | 17.1479                                   | 8.1  | 0.3573                                   | 8.1  | 0.0444                                  | 0.8 | 0.10                 | 280.3                                   | 2.2  | 310.2                                    | 21.7 | 541.7                                     | 177.0 |
| 08TC44-59  | 34         | 2654                                    | 1.8  | 17.7678                                   | 5.8  | 0.6903                                   | 5.9  | 0.0890                                  | 1.1 | 0.19                 | 549.3                                   | 6.0  | 533.0                                    | 24.6 | 463.5                                     | 129.1 |
| 08TC44-61  | 122        | 14072                                   | 1.5  | 9.6015                                    | 1.4  | 4.1708                                   | 1.5  | 0.2904                                  | 0.5 | 0.35                 | 1643.7                                  | 7.7  | 1668.3                                   | 12.5 | 1699.3                                    | 26.4  |
| 08TC44-62  | 88         | 13708                                   | 0.8  | 9.5356                                    | 1.2  | 4.4350                                   | 1.3  | 0.3067                                  | 0.5 | 0.38                 | 1724.5                                  | 7.6  | 1718.9                                   | 10.9 | 1712.0                                    | 22.5  |
| 08TC44-63  | 630        | 7132                                    | 3.0  | 18.5954                                   | 3.2  | 0.3300                                   | 3.2  | 0.0445                                  | 0.5 | 0.16                 | 280.7                                   | 1.4  | 289.6                                    | 8.1  | 361.7                                     | 71.9  |
| 08TC44-64  | 154        | 4746                                    | 0.9  | 19.5440                                   | 3.7  | 0.3608                                   | 3.8  | 0.0511                                  | 0.6 | 0.16                 | 321.5                                   | 1.9  | 312.8                                    | 10.2 | 248.3                                     | 85.9  |
| 08TC44-65  | 603        | 27782                                   | 1.2  | 11.5380                                   | 1.5  | 2.5821                                   | 2.2  | 0.2161                                  | 1.6 | 0.71                 | 1261.1                                  | 17.9 | 1295.6                                   | 16.0 | 1353.2                                    | 29.6  |
| 08TC44-66  | 582        | 12520                                   | 1.6  | 19.4046                                   | 0.9  | 0.2759                                   | 1.5  | 0.0388                                  | 1.2 | 0.80                 | 245.5                                   | 2.8  | 247.4                                    | 3.2  | 264.8                                     | 20.5  |
| 08TC44-68  | 389        | 20170                                   | 1.2  | 16.4929                                   | 1.0  | 0.8383                                   | 1.6  | 0.1003                                  | 1.2 | 0.76                 | 616.0                                   | 6.9  | 618.2                                    | 7.2  | 626.2                                     | 22.1  |
| 08TC44-69  | 280        | 7592                                    | 1.6  | 12.2279                                   | 1.2  | 2.2021                                   | 2.3  | 0.1953                                  | 2.0 | 0.84                 | 1150.0                                  | 20.6 | 1181.7                                   | 16.2 | 1240.2                                    | 24.4  |
| 08TC44-70  | 361        | 6724                                    | 1.2  | 19.7520                                   | 2.9  | 0.2504                                   | 3.2  | 0.0359                                  | 1.3 | 0.40                 | 227.2                                   | 2.9  | 226.9                                    | 6.5  | 223.9                                     | 67.9  |
| 08TC44-71  | 300        | 28550                                   | 2.4  | 12.9816                                   | 0.6  | 1.8636                                   | 0.8  | 0.1755                                  | 0.5 | 0.63                 | 1042.1                                  | 4.8  | 1068.3                                   | 5.3  | 1122.0                                    | 12.4  |
| 08TC44-72  | 372        | 10416                                   | 1.1  | 19.8177                                   | 2.8  | 0.2607                                   | 2.9  | 0.0375                                  | 0.8 | 0.28                 | 237.1                                   | 1.8  | 235.2                                    | 6.0  | 216.3                                     | 63.9  |
| 08TC44-73  | 17         | 1714                                    | 0.9  | 14.4739                                   | 3.7  | 1.5016                                   | 3.8  | 0.1576                                  | 1.1 | 0.29                 | 943.6                                   | 9.8  | 931.0                                    | 23.4 | 901.4                                     | 75.8  |
| 08TC44-74  | 525        | 47462                                   | 1.8  | 13.5325                                   | 0.7  | 1.7025                                   | 1.8  | 0.1671                                  | 1.7 | 0.92                 | 996.1                                   | 15.6 | 1009.5                                   | 11.8 | 1038.6                                    | 14.8  |
| 08TC44-75  | 89         | 13414                                   | 1.6  | 9.5373                                    | 0.9  | 4.2810                                   | 1.3  | 0.2961                                  | 0.9 | 0.67                 | 1672.0                                  | 12.5 | 1689.7                                   | 10.5 | 1711.7                                    | 17.5  |
| 08TC44-77  | 301        | 21776                                   | 4.1  | 8.9699                                    | 1.4  | 4.7896                                   | 2.0  | 0.3116                                  | 1.5 | 0.73                 | 1748.5                                  | 22.5 | 1783.1                                   | 16.9 | 1823.7                                    | 24.9  |
| 08TC44-80  | 152        | 5624                                    | 1.0  | 18.2490                                   | 1.6  | 0.4787                                   | 2.7  | 0.0634                                  | 2.2 | 0.80                 | 396.0                                   | 8.3  | 397.2                                    | 8.8  | 404.0                                     | 35.8  |
| 08TC44-81  | 360        | 26050                                   | 1.5  | 16.3918                                   | 1.3  | 0.8555                                   | 1.5  | 0.1017                                  | 0.8 | 0.50                 | 624.4                                   | 4.5  | 627.7                                    | 7.0  | 639.5                                     | 27.7  |
| 08TC44-82  | 245        | 11400                                   | 1.9  | 17.9895                                   | 1.8  | 0.5339                                   | 2.0  | 0.0697                                  | 0.8 | 0.39                 | 434.1                                   | 3.2  | 434.4                                    | 7.1  | 435.9                                     | 41.0  |
| 08TC44-83  | 426        | 12554                                   | 2.1  | 13.8633                                   | 4.1  | 0.5229                                   | 8.1  | 0.0526                                  | 7.0 | 0.86                 | 330.3                                   | 22.5 | 427.1                                    | 28.2 | 989.7                                     | 83.1  |
| 08TC44-84  | 164        | 21128                                   | 3.0  | 13.4420                                   | 1.5  | 1.8056                                   | 1.6  | 0.1760                                  | 0.5 | 0.31                 | 1045.2                                  | 4.8  | 1047.5                                   | 10.4 | 1052.2                                    | 30.5  |
| 08TC44-85  | 189        | 23262                                   | 1.0  | 9.7413                                    | 1.6  | 4.0203                                   | 2.0  | 0.2840                                  | 1.2 | 0.61                 | 1611.7                                  | 17.4 | 1638.3                                   | 16.2 | 1672.7                                    | 29.2  |
| 08TC44-86  | 251        | 21170                                   | 1.1  | 13.2692                                   | 1.3  | 1.7368                                   | 3.0  | 0.1671                                  | 2.7 | 0.90                 | 996.4                                   | 25.2 | 1022.3                                   | 19.6 | 1078.2                                    | 27.0  |
| 08TC44-87  | 302        | 3880                                    | 0.8  | 17.1121                                   | 2.3  | 0.4964                                   | 2.6  | 0.0616                                  | 1.2 | 0.48                 | 385.4                                   | 4.6  | 409.3                                    | 8.7  | 546.2                                     | 49.3  |
| 08TC44-88  | 1503       | 94156                                   | 22.1 | 9.4471                                    | 1.7  | 4.1039                                   | 2.2  | 0.2812                                  | 1.4 | 0.64                 | 1597.3                                  | 19.5 | 1655.1                                   | 17.6 | 1729.2                                    | 30.3  |
| 08TC44-89  | 18         | 1210                                    | 1.2  | 17.5425                                   | 5.4  | 0.7642                                   | 5.6  | 0.0972                                  | 1.3 | 0.23                 | 598.1                                   | 7.5  | 576.4                                    | 24.5 | 491.7                                     | 119.7 |
| 08TC44-90  | 144        | 4222                                    | 0.9  | 16.1774                                   | 15.1 | 0.6328                                   | 15.2 | 0.0742                                  | 1.4 | 0.09                 | 461.7                                   | 6.1  | 497.8                                    | 59.8 | 667.7                                     | 325.4 |
| 08TC44-91  | 127        | 25256                                   | 1.5  | 9.8261                                    | 1.0  | 3.9023                                   | 1.7  | 0.2781                                  | 1.4 | 0.79                 | 1581.8                                  | 19.1 | 1614.2                                   | 13.9 | 1656.6                                    | 19.3  |
| 08TC44-92  | 377        | 37424                                   | 1.5  | 10.8947                                   | 1.2  | 3.1079                                   | 1.5  | 0.2456                                  | 1.0 | 0.66                 | 1415.6                                  | 12.8 | 1434.7                                   | 11.8 | 1463.0                                    | 22.1  |
| 08TC44-93  | 526        | 16974                                   | 1.0  | 16.8042                                   | 0.8  | 0.7551                                   | 1.8  | 0.0920                                  | 1.6 | 0.89                 | 567.5                                   | 8.8  | 571.2                                    | 7.9  | 585.8                                     | 17.8  |
| 08TC44-95  | 329        | 13928                                   | 2.1  | 17.7944                                   | 1.3  | 0.5633                                   | 1.7  | 0.0727                                  | 1.1 | 0.65                 | 452.4                                   | 4.9  | 453.7                                    | 6.3  | 460.2                                     | 29.1  |
| 08TC44-96  | 106        | 15434                                   | 1.1  | 10.3324                                   | 0.8  | 3.6429                                   | 1.3  | 0.2730                                  | 1.0 | 0.78                 | 1556.0                                  | 13.7 | 1559.0                                   | 10.1 | 1563.0                                    | 14.9  |
| 08TC44-97  | 379        | 32860                                   | 2.6  | 11.6418                                   | 1.6  | 2.5538                                   | 1.7  | 0.2156                                  | 0.8 | 0.44                 | 1258.7                                  | 8.7  | 1287.5                                   | 12.6 | 1335.8                                    | 30.0  |
| 08TC44-98  | 140        | 13654                                   | 0.6  | 10.9136                                   | 0.7  | 2.9730                                   | 3.1  | 0.2353                                  | 3.0 | 0.97                 | 1362.3                                  | 37.0 | 1400.7                                   | 23.5 | 1459.7                                    | 13.8  |
| 08TC44-99  | 394        | 8542                                    | 1.3  | 19.8074                                   | 2.2  | 0.2630                                   | 2.3  | 0.0378                                  | 0.6 | 0.26                 | 239.1                                   | 1.4  | 237.1                                    | 4.8  | 217.4                                     | 51.2  |
| 08TC44-100 | 208        | 5306                                    | 3.3  | 16.8656                                   | 13.9 | 0.5788                                   | 13.9 | 0.0708                                  | 1.3 | 0.09                 | 441.0                                   | 5.5  | 463.7                                    | 51.9 | 577.9                                     | 302.5 |

\* Radiogenic

§ Decay constants used in age calculations:  $\lambda^{238}\text{U} = 1.55125 \times 10^{-10}$ ,  $\lambda^{235}\text{U} = 9.8485 \times 10^{-10}$  (Jaffey *et al.*, 1971);  $^{238}\text{U}/^{235}\text{U} = 137.88$  (Chen and Wasserberg, 1981). Uncertainties are given as  $\pm 2\sigma$  in last three figures.

Common Pb correction from measured  $^{206}\text{Pb}/^{204}\text{Pb}$ , with initial Pb composition from Stacey and Kramers (1975).

† Analyses in which epoxy was overlapped and those with greater than 10% uncertainty, 30% discordance, and/or 5% reverse discordance are excluded. Accepted ages calculated using  $^{206}\text{Pb}/^{238}\text{U}$  ages for grains younger than 800 Ma and  $^{207}\text{Pb}/^{206}\text{Pb}$  ages for

grains older than 800 Ma.
