# Supplementary material
Source: publisher figshare collection journal article supplement (https://gsapubs.figshare.com/ndownloader/files/22398732)
Supplement: Supplementary file 1 [file 22398732 › SD_T4.pdf]

**Table SD4.** Compilation of U-Pb zircon ages from the Sierra Nevada batholith and ophiolitic framework.

| Sample | Latitude | Longitude | Age (Ma) | Reference          |
|--------|----------|-----------|----------|--------------------|
| W34    | 36.458   | -118.872  | 98       | Chen & Moore, 1982 |
| W21    | 36.758   | -119.238  | 100      | Chen & Moore, 1982 |
| W18    | 36.617   | -119.035  | 101      | Chen & Moore, 1982 |
| W19    | 36.668   | -118.980  | 102      | Chen & Moore, 1982 |
| W32    | 36.440   | -118.903  | 104      | Chen & Moore, 1982 |
| W31    | 36.412   | -118.937  | 108      | Chen & Moore, 1982 |
| W22    | 36.725   | -119.292  | 111      | Chen & Moore, 1982 |
| W24    | 36.708   | -119.258  | 111      | Chen & Moore, 1982 |
| W30    | 36.393   | -118.963  | 112      | Chen & Moore, 1982 |
| W26    | 36.665   | -119.218  | 115      | Chen & Moore, 1982 |
| W29    | 36.405   | -119.053  | 116      | Chen & Moore, 1982 |
| W16    | 36.575   | -119.155  | 119      | Chen & Moore, 1982 |
| W6     | 36.722   | -118.970  | 126      | Chen & Moore, 1982 |
| W5     | 36.748   | -119.228  | 145      | Chen & Moore, 1982 |
| KC14   | 36.780   | -118.618  | 89       | Chen & Moore, 1982 |
| K2     | 36.909   | -118.891  | 90       | Chen & Moore, 1982 |
| SQ67   | 36.718   | -118.732  | 91       | Chen & Moore, 1982 |
| KC2    | 36.805   | -118.717  | 97       | Chen & Moore, 1982 |
| K4     | 36.904   | -118.898  | 97       | Chen & Moore, 1982 |
| KC15   | 36.797   | -118.675  | 97       | Chen & Moore, 1982 |
| KC5    | 36.808   | -118.792  | 99       | Chen & Moore, 1982 |
| KC18   | 36.808   | -118.798  | 99       | Chen & Moore, 1982 |
| KC16   | 36.810   | -118.760  | 108      | Chen & Moore, 1982 |
| KC6    | 36.830   | -118.870  | 110      | Chen & Moore, 1982 |
| KC11   | 36.830   | -118.882  | 110      | Chen & Moore, 1982 |
| F11    | 36.846   | -118.930  | 110      | Chen & Moore, 1982 |
| 3S37   | 36.816   | -118.838  | 86       | Chen & Moore, 1982 |
| SQ12   | 36.667   | -118.835  | 98       | Chen & Moore, 1982 |
| SQ46   | 36.730   | -118.788  | 98       | Chen & Moore, 1982 |
| SQ48   | 36.723   | -118.807  | 98       | Chen & Moore, 1982 |
| SQ13   | 36.640   | -118.805  | 97       | Chen & Moore, 1982 |
| SQ22   | 36.605   | -118.738  | 97       | Chen & Moore, 1982 |
| SQ57   | 36.737   | -118.893  | 100      | Chen & Moore, 1982 |
| SQ7    | 36.557   | -118.772  | 102      | Chen & Moore, 1982 |
| SQ75   | 36.582   | -118.753  | 100      | Chen & Moore, 1982 |
| SQ9    | 36.648   | -118.825  | 100      | Chen & Moore, 1982 |
| 95-10  | 36.543   | -118.767  | 102      | Chen & Moore, 1982 |
| 95-11  | 36.579   | -118.742  | 102      | Chen & Moore, 1982 |

|        |        |          |     |                    |
|--------|--------|----------|-----|--------------------|
| 95-12  | 36.633 | -118.792 | 102 | Chen & Moore, 1982 |
| 95-13  | 36.732 | -118.898 | 102 | Chen & Moore, 1982 |
| 95-14  | 36.796 | -118.867 | 102 | Chen & Moore, 1982 |
| SQ15   | 36.513 | -118.803 | 99  | Chen & Moore, 1982 |
| SQ3    | 36.502 | -118.808 | 99  | Chen & Moore, 1982 |
| SQ5    | 36.517 | -118.787 | 97  | Chen & Moore, 1982 |
| SQ61   | 36.683 | -118.833 | 100 | Chen & Moore, 1982 |
| SQ8    | 36.603 | -118.720 | 111 | Chen & Moore, 1982 |
| A95-10 | 36.573 | -118.254 | 84  | Chen & Moore, 1982 |
| 3S36   | 36.798 | -118.582 | 85  | Chen & Moore, 1982 |
| 68M15  | 36.753 | -118.613 | 88  | Chen & Moore, 1982 |
| 6-124  | 36.542 | -118.477 | 95  | Chen & Moore, 1982 |
| OW34   | 36.777 | -118.332 | 103 | Chen & Moore, 1982 |
| OW4    | 36.770 | -118.348 | 103 | Chen & Moore, 1982 |
| 8-38a  | 36.988 | -118.398 | 153 | Chen & Moore, 1982 |
| 08_54  | 36.835 | -118.383 | 156 | Chen & Moore, 1982 |
| 77-7   | 36.423 | -118.393 | 159 | Chen & Moore, 1982 |
| 07_19  | 36.443 | -118.398 | 160 | Chen & Moore, 1982 |
| F1-57  | 37.603 | -117.972 | 175 | Chen & Moore, 1982 |
| OW2    | 37.380 | -118.678 | 210 | Chen & Moore, 1982 |
| MA9    | 37.650 | -118.538 | 161 | Chen & Moore, 1982 |
| 02_26  | 37.273 | -117.578 | 175 | Chen & Moore, 1982 |
| MA5    | 37.860 | -118.630 | 201 | Chen & Moore, 1982 |
| MA2    | 36.893 | -118.847 | 217 | Chen & Moore, 1982 |
| OW7    | 36.793 | -118.303 | 112 | Chen & Moore, 1982 |
| E-27-9 | 36.845 | -118.060 | 152 | Chen & Moore, 1982 |
| OW19   | 36.905 | -118.162 | 163 | Chen & Moore, 1982 |
| 1S94   | 37.176 | -119.833 | 112 | Bateman, 1992      |
| 1S40   | 37.023 | -119.527 | 114 | Bateman, 1992      |
| 1S91   | 37.209 | -119.479 | 114 | Bateman, 1992      |
| 1S97   | 37.288 | -119.868 | 114 | Bateman, 1992      |
| 1S98   | 37.460 | -119.799 | 114 | Bateman, 1992      |
| 1S99   | 37.362 | -119.615 | 114 | Bateman, 1992      |
| 1S100  | 37.523 | -119.615 | 114 | Bateman, 1992      |
| W1-H   | 37.509 | -119.589 | 114 | Bateman, 1992      |
| W2-H   | 37.509 | -119.589 | 114 | Bateman, 1992      |
| W3-H   | 37.500 | -119.611 | 114 | Bateman, 1992      |
| 95-4   | 37.501 | -119.586 | 114 | Bateman, 1992      |
| 95-7   | 37.972 | -119.783 | 114 | Bateman, 1992      |
| W4     | 37.666 | -119.611 | 100 | Bateman, 1992      |
| 95-9   | 37.204 | -119.233 | 90  | Bateman, 1992      |
| 1S84   | 37.217 | -119.152 | 90  | Bateman, 1992      |

|         |        |          |     |                            |
|---------|--------|----------|-----|----------------------------|
| 95-18   | 37.220 | -119.244 | 90  | Bateman, 1992              |
| 1S67    | 37.047 | -119.075 | 90  | Bateman, 1992              |
| 95-1    | 37.458 | -119.542 | 102 | Bateman, 1992              |
| 95-2    | 37.380 | -119.434 | 102 | Bateman, 1992              |
| 96-24   | 37.361 | -119.418 | 102 | Bateman, 1992              |
| 1S90    | 37.197 | -119.420 | 102 | Bateman, 1992              |
| 96-19   | 37.304 | -119.379 | 103 | Bateman, 1992              |
| 96-21   | 37.329 | -119.415 | 103 | Bateman, 1992              |
| 96-2    | 36.945 | -119.014 | 103 | Bateman, 1992              |
| 96-3    | 36.952 | -119.012 | 103 | Bateman, 1992              |
| 96-4    | 36.977 | -119.006 | 103 | Bateman, 1992              |
| 1S125   | 37.077 | -118.353 | 164 | Bateman, 1992              |
| 1S126   | 37.085 | -118.337 | 164 | Bateman, 1992              |
| 1S122   | 37.544 | -118.691 | 210 | Bateman, 1992              |
| 95BR078 | 37.770 | -119.125 | 210 | Bateman, 1992              |
| 95BR080 | 37.764 | -119.113 | 210 | Bateman, 1992              |
| 95BR029 | 37.863 | -119.195 | 210 | Bateman, 1992              |
| 95BR031 | 37.867 | -119.178 | 210 | Bateman, 1992              |
| 95BR042 | 37.820 | -118.504 | 161 | Bateman, 1992              |
| 95BR048 | 37.852 | -118.841 | 214 | Bateman, 1992              |
| 95BR050 | 37.905 | -118.755 | 214 | Bateman, 1992              |
| 95BR051 | 37.852 | -118.636 | 214 | Bateman, 1992              |
| 95BR041 | 37.764 | -118.457 | 214 | Bateman, 1992              |
| 95-15   | 36.796 | -118.959 | 98  | Wenner & Coleman, 2003     |
| 1S128   | 37.135 | -118.455 | 165 | Wenner & Coleman, 2003     |
| 1S92    | 37.124 | -119.735 | 115 | Stern et al., 1981         |
| 1S93    | 37.194 | -119.720 | 115 | Stern et al., 1981         |
| 95-6    | 37.693 | -119.622 | 103 | Stern et al., 1981         |
| 1S41    | 37.061 | -119.448 | 93  | Stern et al., 1981         |
| 1S132   | 37.287 | -118.556 | 200 | Stern et al., 1981         |
| 95BR054 | 37.834 | -118.409 | 90  | Stern et al., 1981         |
| 95BR055 | 37.876 | -118.394 | 90  | Stern et al., 1981         |
| 95BR056 | 37.895 | -118.379 | 90  | Stern et al., 1981         |
| 95BR066 | 37.663 | -118.335 | 90  | Stern et al., 1981         |
| 95BR067 | 37.782 | -118.410 | 90  | Stern et al., 1981         |
| 95BR068 | 37.768 | -118.397 | 90  | Stern et al., 1981         |
| 97WM064 | 37.960 | -118.333 | 90  | Stern et al., 1981         |
| 97WM065 | 37.931 | -118.332 | 90  | Stern et al., 1981         |
| 97WM066 | 37.898 | -118.350 | 90  | Stern et al., 1981         |
| 95BR069 | 37.929 | -119.254 | 96  | Schweickert & Lahren, 1999 |
| 95BR071 | 37.946 | -119.225 | 96  | Schweickert & Lahren, 1999 |
| 95BR036 | 37.966 | -119.153 | 168 | Schweickert & Lahren, 1999 |

|        |        |          |      |                         |
|--------|--------|----------|------|-------------------------|
| 1S106  | 37.855 | -119.484 | 93.3 | Coleman et al., 2004    |
| 1S107  | 37.853 | -119.486 | 93.3 | Coleman et al., 2004    |
| 1S108  | 37.853 | -119.486 | 93.3 | Coleman et al., 2004    |
| 1S119  | 37.908 | -119.265 | 93.3 | Coleman et al., 2004    |
| 95-5   | 37.732 | -119.589 | 93.3 | Coleman et al., 2004    |
| 1S111  | 37.856 | -119.465 | 91.9 | Coleman et al., 2004    |
| 1S118  | 37.893 | -119.263 | 91.9 | Coleman et al., 2004    |
| 1S104  | 37.851 | -119.477 | 91.9 | Coleman et al., 2004    |
| 1S105  | 37.855 | -119.482 | 91.9 | Coleman et al., 2004    |
| Y2     | 37.768 | -119.488 | 91.9 | Coleman et al., 2004    |
| Y3     | 37.758 | -119.494 | 91.9 | Coleman et al., 2004    |
| Y4     | 37.757 | -119.488 | 91.9 | Coleman et al., 2004    |
| 1S109  | 37.869 | -119.457 | 88.8 | Coleman et al., 2004    |
| 1S110  | 37.866 | -119.461 | 88.8 | Coleman et al., 2004    |
| 1S116  | 37.878 | -119.297 | 88.8 | Coleman et al., 2004    |
| 1S101  | 37.883 | -119.345 | 88.1 | Coleman et al., 2004    |
| 1S112  | 37.874 | -119.423 | 88.1 | Coleman et al., 2004    |
| 1S113  | 37.875 | -119.393 | 88.1 | Coleman et al., 2004    |
| 1S117  | 37.877 | -119.305 | 88.1 | Coleman et al., 2004    |
| M95-28 | 37.992 | -119.303 | 88.1 | Coleman et al., 2004    |
| M95-40 | 37.993 | -119.309 | 88.1 | Coleman et al., 2004    |
| M95-79 | 37.986 | -119.325 | 88.1 | Coleman et al., 2004    |
| M95-81 | 37.987 | -119.353 | 88.1 | Coleman et al., 2004    |
| 1S114  | 37.830 | -119.356 | 85.4 | Coleman et al., 2004    |
| 1S115  | 37.839 | -119.356 | 85.4 | Coleman et al., 2004    |
| L94-7  | 37.843 | -119.369 | 85.4 | Coleman et al., 2004    |
| 1S88   | 37.379 | -118.968 | 92   | Coleman & Glazner, 1998 |
| 1S130  | 37.169 | -118.567 | 92   | Coleman & Glazner, 1998 |
| 1S133  | 37.754 | -119.171 | 99   | Kistler & Swanson, 1981 |
| 1S134  | 37.750 | -119.167 | 99   | Kistler & Swanson, 1981 |
| 1S66   | 37.075 | -119.182 | 96   | Tobisch & Cruden, 1995  |
| 95-16  | 37.091 | -119.242 | 102  | Tobisch & Cruden, 1995  |
| 95-17  | 37.154 | -119.269 | 102  | Tobisch & Cruden, 1995  |
| 96-5   | 36.990 | -119.014 | 102  | Tobisch & Cruden, 1995  |
| 96-6   | 37.000 | -119.044 | 102  | Tobisch & Cruden, 1995  |
| 96-7   | 37.034 | -119.073 | 102  | Tobisch & Cruden, 1995  |
| 96-8   | 37.047 | -119.098 | 102  | Tobisch & Cruden, 1995  |
| 96-9   | 37.052 | -119.136 | 102  | Tobisch & Cruden, 1995  |
| F8     | 37.093 | -118.975 | 102  | Tobisch & Cruden, 1995  |
| F9     | 37.076 | -118.964 | 102  | Tobisch & Cruden, 1995  |
| F9.5   | 37.055 | -118.964 | 102  | Tobisch & Cruden, 1995  |
| 1S103  | 37.853 | -119.489 | 104  | Ratajeski et al., 2001  |

|         |        |          |      |                                           |
|---------|--------|----------|------|-------------------------------------------|
| YOS-180 | 37.729 | -119.636 | 104  | Ratajeski et al., 2001                    |
| YOS-1   | 37.728 | -119.624 | 103  | Ratajeski et al., 2001                    |
| YOS-104 | 37.731 | -119.630 | 103  | Ratajeski et al., 2001                    |
| YOS-206 | 37.723 | -119.657 | 102  | Ratajeski et al., 2001                    |
| 96-10   | 37.325 | -119.317 | 90   | McNulty et al., 2000                      |
| 96-11   | 37.322 | -119.312 | 90   | McNulty et al., 2000                      |
| 96-12   | 37.336 | -119.328 | 90   | McNulty et al., 2000                      |
| 96-13   | 37.366 | -119.343 | 90   | McNulty et al., 2000                      |
| 96-14   | 37.388 | -119.359 | 90   | McNulty et al., 2000                      |
| 96-15   | 37.395 | -119.343 | 90   | McNulty et al., 2000                      |
| 96-16   | 37.381 | -119.384 | 90   | McNulty et al., 2000                      |
| 96-17   | 37.363 | -119.384 | 90   | McNulty et al., 2000                      |
| 96-18   | 37.347 | -119.384 | 90   | McNulty et al., 2000                      |
| F3      | 37.481 | -119.264 | 90   | McNulty et al., 2000                      |
| F4      | 37.374 | -119.159 | 90   | McNulty et al., 2000                      |
| F6      | 37.281 | -119.111 | 90   | McNulty et al., 2000                      |
| F7f     | 37.233 | -119.117 | 90   | McNulty et al., 2000                      |
| 1S136   | 38.309 | -119.583 | 86   | Robinson & Kistler, 1986                  |
| 1S137   | 38.325 | -119.682 | 86   | Robinson & Kistler, 1986                  |
| 1S138   | 38.352 | -119.851 | 86   | Robinson & Kistler, 1986                  |
| 1S135   | 38.324 | -119.561 | 91   | Robinson & Kistler, 1986                  |
| 1S139   | 38.355 | -119.879 | 91   | Robinson & Kistler, 1986                  |
| 95BR052 | 37.835 | -118.411 | 74   | Hanson et al., 1987                       |
| 95BR053 | 37.834 | -118.410 | 74   | Hanson et al., 1987                       |
| 95BR065 | 37.641 | -118.336 | 147  | Hanson et al., 1987                       |
| 95BR061 | 37.572 | -118.237 | 165  | Ernst et al., 2003                        |
| 95BR062 | 37.561 | -118.243 | 165  | Ernst et al., 2003                        |
| 95BR064 | 37.544 | -118.328 | 165  | Ernst et al., 2003                        |
| 95BR063 | 37.492 | -118.181 | 175  | Coleman et al., 2003                      |
| 3S28    | 36.461 | -118.634 | 97   | Busby-Spera, 1982                         |
| 3S29    | 36.437 | -118.734 | 100  | Busby-Spera, 1982                         |
| 1S86    | 37.383 | -118.961 | 91.1 | Gaschnig et al., 2006                     |
| 1S87    | 37.382 | -118.964 | 91.1 | Gaschnig et al., 2006                     |
| 1S131   | 37.236 | -118.668 | 91.1 | Gaschnig et al., 2006                     |
| 1S121   | 37.618 | -118.955 | 88.8 | Gaschnig et al., 2006                     |
| 1S123   | 37.458 | -118.734 | 88.8 | Gaschnig et al., 2006                     |
| 99LV655 | 37.590 | -118.891 | 88.8 | Gaschnig et al., 2006                     |
| 1S120   | 37.606 | -119.023 | 87   | Gaschnig et al., 2006                     |
| 1S124   | 37.083 | -118.771 | 87   | Gaschnig et al., 2006                     |
| 1S127   | 37.122 | -118.498 | 95   | Lackey et al., 2008                       |
| 1S129   | 37.111 | -118.548 | 94   | Lackey et al., 2008                       |
| 95BR035 | 37.932 | -119.118 | 93   | Bateman, 1992; Schweickert & Lahren, 1999 |

|           |        |          |     |                                           |
|-----------|--------|----------|-----|-------------------------------------------|
| 95BR073   | 37.949 | -119.192 | 93  | Bateman, 1992; Schweickert & Lahren, 1999 |
| 95BR077   | 37.829 | -119.110 | 93  | Bateman, 1992; Schweickert & Lahren, 1999 |
| 95BR075   | 37.933 | -119.175 | 93  | Bateman, 1992; Schweickert & Lahren, 1999 |
| 95BR037   | 37.959 | -119.125 | 96  | Bateman, 1992; Schweickert & Lahren, 1999 |
| 95BR038   | 37.974 | -119.140 | 96  | Bateman, 1992; Schweickert & Lahren, 1999 |
| 95BR040   | 37.997 | -119.151 | 96  | Bateman, 1992; Schweickert & Lahren, 1999 |
| 95BR032   | 37.858 | -119.074 | 96  | Bateman, 1992; Schweickert & Lahren, 1999 |
| LLC03-01  | 35.922 | -117.942 | 166 | Bartley et al., 2007                      |
| SD01-04   | 36.033 | -118.197 | 147 | Bartley et al., 2007                      |
| JS035     | 35.740 | -117.910 | 182 | Bartley et al., 2007                      |
| JS031     | 35.856 | -117.993 | 166 | Bartley et al., 2007                      |
| JS033     | 35.759 | -117.904 | 176 | Bartley et al., 2007                      |
| JTRS032   | 35.837 | -117.974 | 168 | Bartley et al., 2007                      |
| KOG034    | 35.739 | -117.916 | 92  | Bartley et al., 2007                      |
| KMD037    | 35.634 | -117.963 | 93  | Bartley et al., 2007                      |
| 07_51     | 36.203 | -118.420 | 170 | Chen & Moore, 1982                        |
| KGA-1     | 37.844 | -119.489 | 93  | Coleman et al., 2004                      |
| HD01-35   | 37.906 | -119.265 | 94  | Coleman et al., 2004                      |
| Y01-5     | 37.867 | -119.265 | 93  | Coleman et al., 2004                      |
| HD01-49   | 37.745 | -119.571 | 92  | Coleman et al., 2004                      |
| HD01-43   | 37.744 | -119.532 | 91  | Coleman et al., 2004                      |
| HD02-111  | 37.743 | -119.386 | 89  | Coleman et al., 2004                      |
| HD01-2    | 37.748 | -119.544 | 91  | Coleman et al., 2004                      |
| HD02-102  | 37.920 | -119.297 | 89  | Coleman et al., 2004                      |
| SI-D91-3  | 36.632 | -117.983 | 163 | Dunne & Walker, 2004                      |
| IS-D92-3  | 36.628 | -117.980 | 140 | Dunne & Walker, 2004                      |
| SI-D53-2  | 36.528 | -117.971 | 162 | Dunne & Walker, 2004                      |
| AR-D1-94  | 36.228 | -117.448 | 176 | Dunne & Walker, 2004                      |
| Dunne-5   | 36.151 | -117.497 | 166 | Dunne & Walker, 2004                      |
| AR-D11-95 | 36.143 | -117.503 | 188 | Dunne & Walker, 2004                      |
| DAR-D2-94 | 36.089 | -117.406 | 174 | Dunne & Walker, 2004                      |
| Dunne-3   | 36.046 | -117.437 | 187 | Dunne & Walker, 2004                      |
| SR-D3-3   | 35.848 | -117.270 | 100 | Dunne & Walker, 2004                      |
| SR-D4-3   | 35.848 | -117.270 | 166 | Dunne & Walker, 2004                      |
| SR-D1-3   | 35.837 | -117.277 | 159 | Dunne & Walker, 2004                      |
| SR-D2-3   | 35.799 | -117.281 | 185 | Dunne & Walker, 2004                      |
| HM-D54-2  | 36.601 | -117.496 | 175 | Dunne & Walker, 2004                      |
| SR-1      | 35.596 | -117.220 | 184 | Dunne & Walker, 2004                      |
| SR-15.1   | 35.629 | -117.158 | 177 | Dunne & Walker, 2004                      |
| SR-15.3   | 35.630 | -117.156 | 145 | Dunne & Walker, 2004                      |
| SR-35.2   | 35.611 | -117.189 | 149 | Dunne & Walker, 2004                      |
| SR-48.11  | 35.618 | -117.242 | 151 | Dunne & Walker, 2004                      |

|          |        |          |     |                       |
|----------|--------|----------|-----|-----------------------|
| SR-50.2  | 35.641 | -117.130 | 148 | Dunne & Walker, 2004  |
| SR-50.3  | 35.643 | -117.130 | 149 | Dunne & Walker, 2004  |
| SR-54.6  | 35.597 | -117.220 | 150 | Dunne & Walker, 2004  |
| SR-58.1  | 35.620 | -117.219 | 152 | Dunne & Walker, 2004  |
| SI-D3-94 | 36.647 | -117.989 | 154 | Dunne & Walker, 2004  |
| FP-926   | 35.184 | -117.416 | 92  | Fletcher et al., 2002 |
| B-57     | 35.102 | -117.460 | 93  | Fletcher et al., 2002 |
| 126      | 35.655 | -117.448 | 154 | Irwin & Wooden, 2001  |
| 127      | 35.653 | -117.412 | 149 | Irwin & Wooden, 2001  |
| 125      | 35.689 | -117.394 | 169 | Irwin & Wooden, 2001  |
| 124      | 36.028 | -117.432 | 161 | Irwin & Wooden, 2001  |
| 121      | 36.291 | -117.592 | 174 | Irwin & Wooden, 2001  |
| 122      | 36.258 | -117.579 | 156 | Irwin & Wooden, 2001  |
| 123      | 36.125 | -117.458 | 186 | Irwin & Wooden, 2001  |
| 155      | 36.456 | -119.193 | 125 | Irwin & Wooden, 2001  |
| 168      | 35.894 | -118.928 | 102 | Irwin & Wooden, 2001  |
| 167      | 35.917 | -118.904 | 115 | Irwin & Wooden, 2001  |
| 166      | 35.964 | -118.946 | 287 | Irwin & Wooden, 2001  |
| 165      | 36.066 | -118.937 | 118 | Irwin & Wooden, 2001  |
| 164      | 36.119 | -118.991 | 287 | Irwin & Wooden, 2001  |
| 163      | 36.195 | -119.002 | 118 | Irwin & Wooden, 2001  |
| 162      | 36.243 | -119.000 | 168 | Irwin & Wooden, 2001  |
| 158      | 36.275 | -118.961 | 121 | Irwin & Wooden, 2001  |
| 161      | 36.260 | -119.028 | 205 | Irwin & Wooden, 2001  |
| 157      | 36.382 | -119.028 | 118 | Irwin & Wooden, 2001  |
| 203      | 36.406 | -118.922 | 108 | Irwin & Wooden, 2001  |
| 204      | 36.438 | -118.913 | 104 | Irwin & Wooden, 2001  |
| 156      | 36.430 | -119.137 | 117 | Irwin & Wooden, 2001  |
| 154      | 36.470 | -119.166 | 110 | Irwin & Wooden, 2001  |
| 153      | 36.483 | -119.143 | 130 | Irwin & Wooden, 2001  |
| 152      | 36.534 | -119.210 | 116 | Irwin & Wooden, 2001  |
| 151      | 36.599 | -119.291 | 120 | Irwin & Wooden, 2001  |
| 196      | 36.594 | -118.711 | 98  | Irwin & Wooden, 2001  |
| 200      | 36.576 | -118.330 | 83  | Irwin & Wooden, 2001  |
| 201      | 36.598 | -118.249 | 87  | Irwin & Wooden, 2001  |
| 159      | 36.296 | -119.096 | 120 | Irwin & Wooden, 2001  |
| 160      | 36.283 | -119.093 | 287 | Irwin & Wooden, 2001  |
| 195      | 36.668 | -119.226 | 115 | Irwin & Wooden, 2001  |
| 179      | 36.739 | -119.282 | 111 | Irwin & Wooden, 2001  |
| 178      | 36.737 | -119.312 | 112 | Irwin & Wooden, 2001  |
| 177      | 36.736 | -119.353 | 114 | Irwin & Wooden, 2001  |
| 150      | 36.724 | -119.351 | 115 | Irwin & Wooden, 2001  |

|     |        |          |     |                      |
|-----|--------|----------|-----|----------------------|
| 180 | 36.754 | -119.126 | 111 | Irwin & Wooden, 2001 |
| 181 | 36.745 | -119.070 | 112 | Irwin & Wooden, 2001 |
| 182 | 36.739 | -119.018 | 106 | Irwin & Wooden, 2001 |
| 183 | 36.727 | -118.944 | 128 | Irwin & Wooden, 2001 |
| 198 | 36.685 | -118.851 | 100 | Irwin & Wooden, 2001 |
| 197 | 36.668 | -118.841 | 98  | Irwin & Wooden, 2001 |
| 199 | 36.735 | -118.714 | 91  | Irwin & Wooden, 2001 |
| 187 | 36.799 | -118.785 | 99  | Irwin & Wooden, 2001 |
| 188 | 36.805 | -118.759 | 108 | Irwin & Wooden, 2001 |
| 189 | 36.807 | -118.723 | 97  | Irwin & Wooden, 2001 |
| 190 | 36.814 | -118.682 | 97  | Irwin & Wooden, 2001 |
| 191 | 36.756 | -118.352 | 103 | Irwin & Wooden, 2001 |
| 116 | 36.755 | -118.322 | 103 | Irwin & Wooden, 2001 |
| 117 | 36.765 | -118.301 | 164 | Irwin & Wooden, 2001 |
| 118 | 36.776 | -118.270 | 181 | Irwin & Wooden, 2001 |
| 194 | 36.794 | -118.280 | 112 | Irwin & Wooden, 2001 |
| 193 | 36.796 | -118.314 | 165 | Irwin & Wooden, 2001 |
| 192 | 36.794 | -118.358 | 103 | Irwin & Wooden, 2001 |
| 115 | 36.923 | -118.153 | 163 | Irwin & Wooden, 2001 |
| 112 | 37.088 | -118.272 | 155 | Irwin & Wooden, 2001 |
| 111 | 37.187 | -118.337 | 167 | Irwin & Wooden, 2001 |
| 110 | 37.266 | -118.386 | 95  | Irwin & Wooden, 2001 |
| 97  | 37.145 | -118.557 | 90  | Irwin & Wooden, 2001 |
| 114 | 37.136 | -118.741 | 158 | Irwin & Wooden, 2001 |
| 96  | 37.079 | -118.955 | 88  | Irwin & Wooden, 2001 |
| 184 | 36.825 | -118.902 | 110 | Irwin & Wooden, 2001 |
| 185 | 36.833 | -118.882 | 110 | Irwin & Wooden, 2001 |
| 186 | 36.844 | -118.861 | 86  | Irwin & Wooden, 2001 |
| 93  | 37.095 | -119.270 | 104 | Irwin & Wooden, 2001 |
| 88  | 37.171 | -119.301 | 102 | Irwin & Wooden, 2001 |
| 87  | 37.226 | -119.326 | 113 | Irwin & Wooden, 2001 |
| 85  | 37.276 | -119.441 | 103 | Irwin & Wooden, 2001 |
| 92  | 37.336 | -119.011 | 93  | Irwin & Wooden, 2001 |
| 67  | 37.331 | -120.071 | 123 | Irwin & Wooden, 2001 |
| 75  | 37.314 | -119.642 | 108 | Irwin & Wooden, 2001 |
| 76  | 37.222 | -119.803 | 111 | Irwin & Wooden, 2001 |
| 82  | 37.216 | -119.723 | 115 | Irwin & Wooden, 2001 |
| 81  | 37.194 | -119.625 | 114 | Irwin & Wooden, 2001 |
| 77  | 37.138 | -119.900 | 111 | Irwin & Wooden, 2001 |
| 78  | 37.115 | -119.674 | 115 | Irwin & Wooden, 2001 |
| 83  | 37.058 | -119.727 | 124 | Irwin & Wooden, 2001 |
| 84  | 37.062 | -119.692 | 110 | Irwin & Wooden, 2001 |

|     |        |          |     |                      |
|-----|--------|----------|-----|----------------------|
| 137 | 37.025 | -119.688 | 132 | Irwin & Wooden, 2001 |
| 89  | 37.018 | -119.525 | 112 | Irwin & Wooden, 2001 |
| 91  | 37.047 | -119.409 | 93  | Irwin & Wooden, 2001 |
| 90  | 37.091 | -119.357 | 116 | Irwin & Wooden, 2001 |
| 138 | 36.877 | -119.501 | 120 | Irwin & Wooden, 2001 |
| 139 | 36.860 | -119.457 | 114 | Irwin & Wooden, 2001 |
| 140 | 36.838 | -119.476 | 121 | Irwin & Wooden, 2001 |
| 149 | 36.805 | -119.397 | 170 | Irwin & Wooden, 2001 |
| 148 | 36.820 | -119.388 | 207 | Irwin & Wooden, 2001 |
| 147 | 36.837 | -119.388 | 250 | Irwin & Wooden, 2001 |
| 141 | 36.858 | -119.409 | 154 | Irwin & Wooden, 2001 |
| 146 | 36.834 | -119.356 | 157 | Irwin & Wooden, 2001 |
| 142 | 36.863 | -119.354 | 125 | Irwin & Wooden, 2001 |
| 143 | 36.870 | -119.304 | 98  | Irwin & Wooden, 2001 |
| 144 | 36.843 | -119.320 | 169 | Irwin & Wooden, 2001 |
| 145 | 36.802 | -119.299 | 170 | Irwin & Wooden, 2001 |
| 98  | 36.765 | -119.257 | 199 | Irwin & Wooden, 2001 |
| 63  | 37.446 | -119.947 | 118 | Irwin & Wooden, 2001 |
| 37  | 37.948 | -120.535 | 280 | Irwin & Wooden, 2001 |
| 40  | 37.890 | -120.460 | 190 | Irwin & Wooden, 2001 |
| 41  | 37.879 | -120.441 | 199 | Irwin & Wooden, 2001 |
| 42  | 37.853 | -120.398 | 198 | Irwin & Wooden, 2001 |
| 47  | 37.743 | -120.333 | 182 | Irwin & Wooden, 2001 |
| 48  | 37.730 | -120.328 | 200 | Irwin & Wooden, 2001 |
| 49  | 37.694 | -120.266 | 196 | Irwin & Wooden, 2001 |
| 45  | 37.797 | -120.258 | 162 | Irwin & Wooden, 2001 |
| 43  | 37.880 | -120.380 | 148 | Irwin & Wooden, 2001 |
| 39  | 37.930 | -120.327 | 164 | Irwin & Wooden, 2001 |
| 38  | 37.985 | -120.323 | 173 | Irwin & Wooden, 2001 |
| 130 | 37.750 | -119.884 | 116 | Irwin & Wooden, 2001 |
| 52  | 37.511 | -120.225 | 150 | Irwin & Wooden, 2001 |
| 53  | 37.453 | -120.257 | 147 | Irwin & Wooden, 2001 |
| 54  | 37.496 | -120.280 | 149 | Irwin & Wooden, 2001 |
| 58  | 37.416 | -120.264 | 146 | Irwin & Wooden, 2001 |
| 62  | 37.433 | -120.112 | 151 | Irwin & Wooden, 2001 |
| 64  | 37.395 | -120.026 | 151 | Irwin & Wooden, 2001 |
| 128 | 37.964 | -119.785 | 108 | Irwin & Wooden, 2001 |
| 129 | 37.919 | -119.803 | 113 | Irwin & Wooden, 2001 |
| 44  | 37.975 | -119.985 | 151 | Irwin & Wooden, 2001 |
| 46  | 37.874 | -119.987 | 166 | Irwin & Wooden, 2001 |
| 50  | 37.834 | -119.927 | 116 | Irwin & Wooden, 2001 |
| 51  | 37.810 | -119.906 | 163 | Irwin & Wooden, 2001 |

|     |        |          |     |                      |
|-----|--------|----------|-----|----------------------|
| 131 | 37.773 | -119.771 | 119 | Irwin & Wooden, 2001 |
| 132 | 37.739 | -119.721 | 102 | Irwin & Wooden, 2001 |
| 57  | 37.702 | -119.711 | 103 | Irwin & Wooden, 2001 |
| 61  | 37.640 | -119.716 | 117 | Irwin & Wooden, 2001 |
| 60  | 37.697 | -119.607 | 96  | Irwin & Wooden, 2001 |
| 66  | 37.564 | -119.632 | 97  | Irwin & Wooden, 2001 |
| 70  | 37.638 | -119.428 | 100 | Irwin & Wooden, 2001 |
| 210 | 37.625 | -119.430 | 97  | Irwin & Wooden, 2001 |
| 65  | 37.613 | -119.535 | 112 | Irwin & Wooden, 2001 |
| 68  | 37.594 | -119.398 | 98  | Irwin & Wooden, 2001 |
| 212 | 37.541 | -119.323 | 94  | Irwin & Wooden, 2001 |
| 72  | 37.688 | -119.375 | 98  | Irwin & Wooden, 2001 |
| 69  | 37.672 | -119.379 | 100 | Irwin & Wooden, 2001 |
| 71  | 37.662 | -119.363 | 93  | Irwin & Wooden, 2001 |
| 208 | 37.615 | -119.369 | 86  | Irwin & Wooden, 2001 |
| 211 | 37.583 | -119.296 | 97  | Irwin & Wooden, 2001 |
| 209 | 37.670 | -119.280 | 98  | Irwin & Wooden, 2001 |
| 55  | 37.850 | -119.484 | 88  | Irwin & Wooden, 2001 |
| 58  | 37.885 | -119.348 | 86  | Irwin & Wooden, 2001 |
| 73  | 37.722 | -119.162 | 91  | Irwin & Wooden, 2001 |
| 136 | 37.636 | -118.528 | 160 | Irwin & Wooden, 2001 |
| 100 | 37.798 | -118.552 | 161 | Irwin & Wooden, 2001 |
| 135 | 37.862 | -118.621 | 201 | Irwin & Wooden, 2001 |
| 99  | 37.904 | -118.823 | 214 | Irwin & Wooden, 2001 |
| 133 | 37.961 | -119.225 | 210 | Irwin & Wooden, 2001 |
| 134 | 37.760 | -119.120 | 210 | Irwin & Wooden, 2001 |
| 79  | 37.643 | -119.064 | 76  | Irwin & Wooden, 2001 |
| 80  | 37.533 | -119.031 | 99  | Irwin & Wooden, 2001 |
| 74  | 37.370 | -119.603 | 105 | Irwin & Wooden, 2001 |
| 86  | 37.427 | -119.068 | 90  | Irwin & Wooden, 2001 |
| 103 | 37.396 | -118.736 | 169 | Irwin & Wooden, 2001 |
| 95  | 37.371 | -118.737 | 93  | Irwin & Wooden, 2001 |
| 113 | 37.373 | -118.667 | 198 | Irwin & Wooden, 2001 |
| 105 | 37.361 | -118.687 | 202 | Irwin & Wooden, 2001 |
| 104 | 37.389 | -118.681 | 207 | Irwin & Wooden, 2001 |
| 94  | 37.471 | -118.760 | 88  | Irwin & Wooden, 2001 |
| 102 | 37.499 | -118.726 | 89  | Irwin & Wooden, 2001 |
| 101 | 37.781 | -118.401 | 90  | Irwin & Wooden, 2001 |
| 106 | 37.581 | -118.216 | 161 | Irwin & Wooden, 2001 |
| 107 | 37.540 | -118.145 | 172 | Irwin & Wooden, 2001 |
| 108 | 37.454 | -117.935 | 168 | Irwin & Wooden, 2001 |
| 109 | 37.416 | -117.970 | 167 | Irwin & Wooden, 2001 |

|     |        |          |     |                      |
|-----|--------|----------|-----|----------------------|
| 120 | 36.619 | -117.978 | 174 | Irwin & Wooden, 2001 |
| 202 | 36.582 | -118.108 | 85  | Irwin & Wooden, 2001 |
| 119 | 36.657 | -118.112 | 148 | Irwin & Wooden, 2001 |
| 1   | 40.165 | -121.026 | 378 | Irwin & Wooden, 2001 |
| 2   | 40.012 | -121.167 | 314 | Irwin & Wooden, 2001 |
| 8   | 39.787 | -121.064 | 193 | Irwin & Wooden, 2001 |
| 231 | 39.770 | -121.299 | 142 | Irwin & Wooden, 2001 |
| 236 | 39.794 | -121.329 | 142 | Irwin & Wooden, 2001 |
| 3   | 39.962 | -121.286 | 140 | Irwin & Wooden, 2001 |
| 4   | 39.883 | -121.361 | 140 | Irwin & Wooden, 2001 |
| 230 | 39.777 | -121.506 | 141 | Irwin & Wooden, 2001 |
| 5   | 39.786 | -121.453 | 204 | Irwin & Wooden, 2001 |
| 16  | 39.725 | -120.731 | 423 | Irwin & Wooden, 2001 |
| 229 | 39.522 | -120.541 | 166 | Irwin & Wooden, 2001 |
| 20  | 39.458 | -120.609 | 368 | Irwin & Wooden, 2001 |
| 18  | 39.487 | -120.694 | 409 | Irwin & Wooden, 2001 |
| 21  | 39.471 | -120.710 | 385 | Irwin & Wooden, 2001 |
| 19  | 39.449 | -120.647 | 385 | Irwin & Wooden, 2001 |
| 22  | 39.358 | -120.667 | 385 | Irwin & Wooden, 2001 |
| 23  | 39.311 | -120.608 | 164 | Irwin & Wooden, 2001 |
| 24  | 39.298 | -120.608 | 163 | Irwin & Wooden, 2001 |
| 26  | 39.310 | -120.507 | 120 | Irwin & Wooden, 2001 |
| 17  | 39.467 | -120.862 | 388 | Irwin & Wooden, 2001 |
| 14  | 39.397 | -121.074 | 159 | Irwin & Wooden, 2001 |
| 219 | 39.489 | -121.109 | 159 | Irwin & Wooden, 2001 |
| 11  | 39.509 | -121.049 | 205 | Irwin & Wooden, 2001 |
| 10  | 39.596 | -120.993 | 168 | Irwin & Wooden, 2001 |
| 218 | 39.613 | -121.006 | 168 | Irwin & Wooden, 2001 |
| 217 | 39.654 | -121.043 | 209 | Irwin & Wooden, 2001 |
| 216 | 39.672 | -121.045 | 207 | Irwin & Wooden, 2001 |
| 237 | 39.745 | -121.375 | 142 | Irwin & Wooden, 2001 |
| 6   | 39.721 | -121.503 | 196 | Irwin & Wooden, 2001 |
| 7   | 39.659 | -121.469 | 164 | Irwin & Wooden, 2001 |
| 9   | 39.563 | -121.379 | 140 | Irwin & Wooden, 2001 |
| 232 | 39.483 | -121.456 | 128 | Irwin & Wooden, 2001 |
| 230 | 39.411 | -121.370 | 159 | Irwin & Wooden, 2001 |
| 13  | 39.380 | -121.278 | 162 | Irwin & Wooden, 2001 |
| 12  | 39.367 | -121.303 | 162 | Irwin & Wooden, 2001 |
| 234 | 39.310 | -121.148 | 159 | Irwin & Wooden, 2001 |
| 220 | 39.342 | -121.110 | 161 | Irwin & Wooden, 2001 |
| 15  | 39.302 | -121.075 | 159 | Irwin & Wooden, 2001 |
| 222 | 39.244 | -121.109 | 163 | Irwin & Wooden, 2001 |

|              |        |          |     |                          |
|--------------|--------|----------|-----|--------------------------|
| 221          | 39.262 | -121.016 | 158 | Irwin & Wooden, 2001     |
| 235          | 39.213 | -121.064 | 159 | Irwin & Wooden, 2001     |
| 25           | 39.067 | -121.309 | 162 | Irwin & Wooden, 2001     |
| 27           | 38.901 | -121.107 | 163 | Irwin & Wooden, 2001     |
| 206          | 38.905 | -120.612 | 170 | Irwin & Wooden, 2001     |
| 214          | 38.746 | -120.863 | 143 | Irwin & Wooden, 2001     |
| 28           | 38.838 | -121.063 | 165 | Irwin & Wooden, 2001     |
| 223          | 38.784 | -121.157 | 142 | Irwin & Wooden, 2001     |
| 29           | 38.757 | -121.003 | 162 | Irwin & Wooden, 2001     |
| 30           | 38.659 | -120.982 | 166 | Irwin & Wooden, 2001     |
| 32           | 38.577 | -120.959 | 286 | Irwin & Wooden, 2001     |
| 31           | 38.589 | -120.899 | 304 | Irwin & Wooden, 2001     |
| 215          | 38.578 | -120.878 | 150 | Irwin & Wooden, 2001     |
| 225          | 38.557 | -120.772 | 170 | Irwin & Wooden, 2001     |
| 224          | 38.660 | -120.699 | 133 | Irwin & Wooden, 2001     |
| 205          | 38.590 | -120.567 | 152 | Irwin & Wooden, 2001     |
| 207          | 38.396 | -120.651 | 125 | Irwin & Wooden, 2001     |
| 227          | 38.334 | -120.638 | 165 | Irwin & Wooden, 2001     |
| 228          | 38.293 | -120.610 | 160 | Irwin & Wooden, 2001     |
| 226          | 38.302 | -120.717 | 175 | Irwin & Wooden, 2001     |
| 33           | 38.173 | -120.622 | 177 | Irwin & Wooden, 2001     |
| 31           | 38.153 | -120.367 | 216 | Irwin & Wooden, 2001     |
| 35           | 38.045 | -120.446 | 170 | Irwin & Wooden, 2001     |
| 36           | 38.038 | -120.262 | 162 | Irwin & Wooden, 2001     |
| ERP 10.30.1* | 34.942 | -119.212 | 155 | James, 1986a             |
| ERP 10.30.2* | 34.945 | -119.221 | 160 | James, 1986a             |
| ERP 90*      | 34.931 | -119.217 | 155 | James, 1986a             |
| Gold Hill 1* | 35.833 | -120.350 | 143 | James, 1986a             |
| 2*           | 37.129 | -122.152 | 99  | James, 1986a             |
| 1*           | 37.082 | -122.142 | 99  | James, 1986a             |
| 10*          | 37.025 | -122.084 | 93  | James, 1986a             |
| 3*           | 37.570 | -122.508 | 103 | James, 1986a             |
| Logan1*      | 36.875 | -121.574 | 161 | James, 1986a             |
| noname*      | 34.869 | -119.148 | 98  | James, 1986b             |
| granite*     | 34.681 | -119.047 | 76  | Kellogg, 1999            |
| 630-5        | 36.004 | -121.495 | 92  | Kidder et al., 2003      |
| 701-4        | 36.026 | -121.476 | 86  | Kidder et al., 2003      |
| 706-4        | 36.042 | -121.478 | 81  | Kidder et al., 2003      |
| BH5-88*      | 38.305 | -123.054 | 97  | Kistler & Champion, 2001 |
| PR5-88*      | 38.186 | -122.958 | 104 | Kistler & Champion, 2001 |
| FAIS1-88*    | 37.699 | -122.999 | 95  | Kistler & Champion, 2001 |
| COBA2-92*    | 37.751 | -123.072 | 100 | Kistler & Champion, 2001 |

|             |        |          |     |                          |
|-------------|--------|----------|-----|--------------------------|
| MON6-88*    | 37.560 | -122.508 | 102 | Kistler & Champion, 2001 |
| BL10-89*    | 36.990 | -122.133 | 92  | Kistler & Champion, 2001 |
| K1A-87*     | 37.138 | -122.192 | 99  | Kistler & Champion, 2001 |
| SANLU5-90*  | 36.463 | -121.926 | 92  | Kistler & Champion, 2001 |
| SANLU10-91* | 36.208 | -121.741 | 99  | Kistler & Champion, 2001 |
| 24*         | 36.559 | -121.243 | 83  | Kistler & Champion, 2001 |
| 27*         | 36.268 | -121.070 | 85  | Kistler & Champion, 2001 |
| 29*         | 36.289 | -120.997 | 84  | Kistler & Champion, 2001 |
| 23*         | 36.499 | -121.295 | 91  | Kistler & Champion, 2001 |
| 26*         | 36.289 | -121.052 | 80  | Kistler & Champion, 2001 |
| 14*         | 36.672 | -121.535 | 105 | Kistler & Champion, 2001 |
| 31*         | 35.447 | -120.545 | 80  | Kistler & Champion, 2001 |
| 32*         | 35.605 | -120.269 | 82  | Kistler & Champion, 2001 |
| KM-11b      | 36.885 | -118.345 | 95  | Mahan et al., 2003       |
| KMR         | 36.882 | -118.359 | 94  | Mahan et al., 2003       |
| KM-10a      | 36.883 | -118.349 | 98  | Mahan et al., 2003       |
| WLT94-9     | 36.901 | -118.413 | 165 | Mahan et al., 2003       |
| KM-1        | 36.886 | -118.356 | 164 | Mahan et al., 2003       |
| SH-2.27.3   | 34.726 | -117.616 | 148 | Martin et al., 2002      |
| AL-26       | 35.084 | -116.611 | 149 | Miller & Walker, 2002    |
| AL27        | 35.062 | -116.642 | 75  | Miller & Walker, 2002    |
| EPM-1       | 35.422 | -117.808 | 259 | Miller et al., 1995      |
| EPM-2       | 35.407 | -117.867 | 246 | Miller et al., 1995      |
| EPM-3       | 35.483 | -117.688 | 171 | Miller et al., 1995      |
| TC27        | 35.218 | -118.461 | 90  | Saleeby et al., 1987     |
| CM620       | 35.124 | -118.739 | 95  | Saleeby et al., 1987     |
| BM684       | 35.313 | -118.656 | 100 | Saleeby et al., 1987     |
| TC15        | 35.230 | -118.491 | 97  | Saleeby et al., 1987     |
| TC42        | 35.228 | -118.496 | 98  | Saleeby et al., 1987     |
| TC40        | 35.224 | -118.483 | 97  | Saleeby et al., 1987     |
| CM25        | 35.211 | -118.663 | 101 | Saleeby et al., 1987     |
| CM26        | 35.140 | -118.618 | 100 | Saleeby et al., 1987     |
| CM9         | 35.041 | -118.568 | 100 | Saleeby et al., 1987     |
| CM22b       | 35.184 | -118.646 | 100 | Saleeby et al., 1987     |
| TL197       | 34.991 | -118.538 | 102 | Saleeby et al., 1987     |
| WR84a       | 34.983 | -118.721 | 102 | Saleeby et al., 1987     |
| WR86        | 34.974 | -118.729 | 102 | Saleeby et al., 1987     |
| CM630       | 35.125 | -118.723 | 115 | Saleeby et al., 1987     |
| WR643       | 35.024 | -118.707 | 117 | Saleeby et al., 1987     |
| WR171       | 34.992 | -118.729 | 115 | Saleeby et al., 1987     |
| WR30/2      | 34.984 | -118.725 | 115 | Saleeby et al., 1987     |
| WR39        | 34.944 | -118.663 | 113 | Saleeby et al., 1987     |

|       |        |          |     |                      |
|-------|--------|----------|-----|----------------------|
| PC35  | 34.919 | -118.796 | 110 | Saleeby et al., 1987 |
| PC31  | 34.941 | -118.826 | 114 | Saleeby et al., 1987 |
| PC32  | 34.937 | -118.819 | 113 | Saleeby et al., 1987 |
| PC34  | 34.928 | -118.801 | 117 | Saleeby et al., 1987 |
| PC36  | 34.916 | -118.794 | 112 | Saleeby et al., 1987 |
| PC37  | 34.908 | -118.788 | 115 | Saleeby et al., 1987 |
| PC129 | 34.925 | -118.912 | 115 | Saleeby et al., 1987 |
| WR91a | 34.958 | -118.719 | 113 | Saleeby et al., 1987 |
| WR40  | 34.946 | -118.678 | 117 | Saleeby et al., 1987 |
| TC12a | 35.227 | -118.488 | 117 | Saleeby et al., 1987 |
| GV1   | 34.891 | -118.912 | 105 | Saleeby et al., 2007 |
| GV2   | 34.917 | -118.922 | 101 | Saleeby et al., 2007 |
| GC46  | 34.916 | -118.858 | 102 | Saleeby et al., 2007 |
| PC107 | 34.914 | -118.823 | 110 | Saleeby et al., 2007 |
| GC33  | 34.922 | -118.827 | 112 | Saleeby et al., 2007 |
| CM657 | 35.005 | -118.758 | 111 | Saleeby et al., 2007 |
| WR643 | 35.010 | -118.707 | 115 | Saleeby et al., 2007 |
| TC2a  | 34.981 | -118.722 | 102 | Saleeby et al., 2007 |
| GC16  | 35.013 | -118.643 | 112 | Saleeby et al., 2007 |
| WR27A | 34.946 | -118.671 | 110 | Saleeby et al., 2007 |
| GC1   | 34.981 | -118.580 | 101 | Saleeby et al., 2007 |
| CM13b | 35.212 | -118.551 | 99  | Saleeby et al., 2007 |
| K1    | 35.875 | -118.456 | 105 | Saleeby et al., 2008 |
| K2    | 35.770 | -118.485 | 104 | Saleeby et al., 2008 |
| K3    | 35.682 | -118.443 | 104 | Saleeby et al., 2008 |
| K4    | 35.615 | -118.436 | 104 | Saleeby et al., 2008 |
| K5    | 35.787 | -118.570 | 103 | Saleeby et al., 2008 |
| K6    | 35.527 | -118.425 | 103 | Saleeby et al., 2008 |
| K7    | 35.498 | -118.399 | 103 | Saleeby et al., 2008 |
| K8    | 35.825 | -118.462 | 103 | Saleeby et al., 2008 |
| B1    | 35.478 | -118.733 | 102 | Saleeby et al., 2008 |
| B2    | 35.507 | -118.687 | 101 | Saleeby et al., 2008 |
| B3    | 35.351 | -118.571 | 100 | Saleeby et al., 2008 |
| B4    | 35.395 | -118.435 | 102 | Saleeby et al., 2008 |
| B5    | 35.750 | -118.585 | 103 | Saleeby et al., 2008 |
| B6    | 35.436 | -118.517 | 109 | Saleeby et al., 2008 |
| B7    | 35.451 | -118.589 | 113 | Saleeby et al., 2008 |
| B8    | 35.454 | -118.734 | 98  | Saleeby et al., 2008 |
| B9    | 35.575 | -118.566 | 100 | Saleeby et al., 2008 |
| B10   | 35.603 | -118.648 | 100 | Saleeby et al., 2008 |
| N1    | 35.666 | -118.588 | 101 | Saleeby et al., 2008 |
| N2    | 35.975 | -118.473 | 101 | Saleeby et al., 2008 |

|            |        |          |     |                       |
|------------|--------|----------|-----|-----------------------|
| N3         | 35.826 | -118.600 | 99  | Saleeby et al., 2008  |
| N4         | 35.852 | -118.626 | 98  | Saleeby et al., 2008  |
| N5         | 35.669 | -118.486 | 98  | Saleeby et al., 2008  |
| N6         | 35.976 | -118.569 | 97  | Saleeby et al., 2008  |
| N7         | 36.095 | -118.463 | 97  | Saleeby et al., 2008  |
| N8         | 35.105 | -118.487 | 96  | Saleeby et al., 2008  |
| N9         | 35.676 | -118.464 | 96  | Saleeby et al., 2008  |
| N10        | 35.426 | -118.420 | 96  | Saleeby et al., 2008  |
| S1         | 35.717 | -118.406 | 100 | Saleeby et al., 2008  |
| S2         | 35.982 | -118.359 | 99  | Saleeby et al., 2008  |
| S3         | 35.673 | -118.353 | 99  | Saleeby et al., 2008  |
| S4         | 35.615 | -118.249 | 98  | Saleeby et al., 2008  |
| S5         | 35.578 | -118.393 | 97  | Saleeby et al., 2008  |
| S6         | 35.563 | -118.147 | 95  | Saleeby et al., 2008  |
| S7         | 35.729 | -118.376 | 94  | Saleeby et al., 2008  |
| D1         | 35.848 | -118.349 | 95  | Saleeby et al., 2008  |
| D2         | 35.709 | -118.416 | 95  | Saleeby et al., 2008  |
| D3         | 35.701 | -118.235 | 93  | Saleeby et al., 2008  |
| D4         | 35.462 | -118.281 | 93  | Saleeby et al., 2008  |
| D5         | 35.380 | -118.342 | 92  | Saleeby et al., 2008  |
| D6         | 35.741 | -118.143 | 91  | Saleeby et al., 2008  |
| D7         | 35.791 | -118.050 | 90  | Saleeby et al., 2008  |
| D8         | 35.483 | -118.227 | 89  | Saleeby et al., 2008  |
| D9         | 35.986 | -118.443 | 89  | Saleeby et al., 2008  |
| D10        | 35.744 | -118.309 | 89  | Saleeby et al., 2008  |
| D11        | 35.857 | -118.407 | 87  | Saleeby et al., 2008  |
| D12        | 35.444 | -118.370 | 86  | Saleeby et al., 2008  |
| D13        | 35.801 | -118.416 | 86  | Saleeby et al., 2008  |
| D14        | 35.736 | -118.077 | 84  | Saleeby et al., 2008  |
| Plate III* | 35.273 | -117.847 | 87  | Silver & Nourse, 1991 |
| 08SE596    | 34.878 | -119.219 | 105 | this study            |
| 09SE23     | 34.925 | -119.282 | 155 | this study            |
| 08SE582    | 34.867 | -119.128 | 135 | this study            |
| 08SE451    | 34.875 | -119.111 | 136 | this study            |
| 08SE450    | 34.872 | -119.110 | 105 | this study            |
| 08SE262    | 34.896 | -119.094 | 136 | this study            |
| 04SE5      | 34.852 | -119.065 | 92  | this study            |
| 06SE19A    | 34.857 | -119.068 | 91  | this study            |
| 07SE94     | 34.899 | -119.029 | 106 | this study            |
| 08SE46     | 34.908 | -118.976 | 136 | this study            |
| 08SE256    | 34.869 | -119.047 | 88  | this study            |
| 08SE675    | 34.896 | -118.921 | 136 | this study            |

|         |        |          |     |                                   |
|---------|--------|----------|-----|-----------------------------------|
| 08SE679 | 34.885 | -118.909 | 105 | this study                        |
| 08SE674 | 34.885 | -118.920 | 121 | this study                        |
| 08TC27A | 34.971 | -118.447 | 147 | this study                        |
| 91TH181 | 35.053 | -118.411 | 92  | this study                        |
| 93TH417 | 35.040 | -118.440 | 92  | this study                        |
| 10TC5   | 34.803 | -118.787 | 92  | this study                        |
| G11     | 37.436 | -120.119 | 151 | this study                        |
| 02339   | 36.552 | -121.250 | 88  | Barth et al., 2003                |
| 02340   | 36.364 | -121.555 | 86  | Barth et al., 2003                |
| 02341   | 36.464 | -121.712 | 82  | Barth et al., 2003                |
| WBK129  | 36.589 | 119.202  | 120 | Clemens-Knott & Saleeby, 1999     |
| WBK131  | 36.539 | -119.111 | 123 | Clemens-Knott & Saleeby, 1999     |
| MK-550* | 36.500 | -118.550 | 107 | Busby-Spera, 1982                 |
| MK-510* | 36.450 | -118.650 | 99  | Busby-Spera, 1982                 |
| MK-560* | 36.400 | -118.525 | 97  | Busby-Spera, 1982                 |
| K-D1-0  | 35.829 | -118.112 | 148 | Saleeby and Dunne, in preparation |
| K-D2-0  | 35.882 | -118.121 | 225 | Saleeby and Dunne, in preparation |
| K-D1-1  | 35.944 | -118.080 | 185 | Saleeby and Dunne, in preparation |
| K-D2-1  | 35.944 | -118.081 | 156 | Saleeby and Dunne, in preparation |
| K-D18-1 | 35.939 | -118.073 | 158 | Saleeby and Dunne, in preparation |
| B-D2-0  | 36.020 | -118.291 | 215 | Saleeby and Dunne, in preparation |
| B-D3-0  | 36.002 | -118.336 | 229 | Saleeby and Dunne, in preparation |
| B-D21-2 | 36.019 | -118.324 | 85  | Saleeby and Dunne, in preparation |
| B-D23-2 | 35.986 | -118.367 | 95  | Saleeby and Dunne, in preparation |
| I-D91-0 | 35.667 | -117.949 | 248 | Saleeby and Dunne, in preparation |
| I-D94-0 | 35.664 | -118.024 | 248 | Saleeby and Dunne, in preparation |
| 04SS39  | 35.856 | -117.992 | 171 | Saleeby and Dunne, in preparation |

\* Location approximate
