# Supplementary material
Source: publisher figshare collection journal article supplement (https://gsapubs.figshare.com/ndownloader/files/22398732)
Supplement: Supplementary file 1 [file 22398732 › SD_T5.pdf]

**Table SD5.** Compilation of  $Sr_i$  ratios from the Sierra Nevada batholith and ophiolitic framework.<sup>§</sup>

| Sample | Latitude | Longitude | $Sr_i$  | Reference            |
|--------|----------|-----------|---------|----------------------|
| BL-7   | 37.320   | -119.670  | 0.70473 | Kistler et al., 1986 |
| BL-19  | 37.450   | -119.642  | 0.70539 | Kistler et al., 1986 |
| BL-10  | 37.340   | -119.660  | 0.70560 | Kistler et al., 1986 |
| BL-8   | 37.330   | -119.660  | 0.70563 | Kistler et al., 1986 |
| BL-4   | 37.300   | -119.660  | 0.70567 | Kistler et al., 1986 |
| BL-15  | 37.390   | -119.648  | 0.70596 | Kistler et al., 1986 |
| BL-17  | 37.400   | -119.640  | 0.70600 | Kistler et al., 1986 |
| Z-54   | 37.855   | -119.484  | 0.70580 | Kistler et al., 1986 |
| Z-52   | 37.857   | -119.486  | 0.70580 | Kistler et al., 1986 |
| Z-51   | 37.854   | -119.439  | 0.70590 | Kistler et al., 1986 |
| Z-46   | 37.906   | -119.265  | 0.70590 | Kistler et al., 1986 |
| Z-47   | 37.909   | -119.264  | 0.70590 | Kistler et al., 1986 |
| Z-64   | 37.854   | -119.486  | 0.70600 | Kistler et al., 1986 |
| Z-44   | 37.904   | -119.268  | 0.70600 | Kistler et al., 1986 |
| Z-57   | 37.851   | -119.477  | 0.70610 | Kistler et al., 1986 |
| Z-56   | 37.854   | -119.480  | 0.70610 | Kistler et al., 1986 |
| Z-55   | 37.855   | -119.482  | 0.70610 | Kistler et al., 1986 |
| Z-43   | 37.892   | -119.280  | 0.70610 | Kistler et al., 1986 |
| Z-16   | 37.894   | -119.265  | 0.70610 | Kistler et al., 1986 |
| Z-45   | 37.905   | -119.266  | 0.70610 | Kistler et al., 1986 |
| Z-23   | 37.812   | -119.485  | 0.70620 | Kistler et al., 1986 |
| Z-6    | 37.813   | -119.482  | 0.70620 | Kistler et al., 1986 |
| Z-25   | 37.821   | -119.478  | 0.70620 | Kistler et al., 1986 |
| Z-7    | 37.827   | -119.469  | 0.70620 | Kistler et al., 1986 |
| Z-5    | 37.814   | -119.493  | 0.70630 | Kistler et al., 1986 |
| Z-24   | 37.817   | -119.480  | 0.70630 | Kistler et al., 1986 |
| Z-26   | 37.825   | -119.474  | 0.70630 | Kistler et al., 1986 |
| Z-27   | 37.831   | -119.467  | 0.70630 | Kistler et al., 1986 |
| Z-28   | 37.834   | -119.460  | 0.70630 | Kistler et al., 1986 |
| Z-8    | 37.835   | -119.456  | 0.70630 | Kistler et al., 1986 |
| Z-59   | 37.860   | -119.472  | 0.70630 | Kistler et al., 1986 |
| Z-60   | 37.864   | -119.461  | 0.70630 | Kistler et al., 1986 |
| Z-37   | 37.875   | -119.388  | 0.70630 | Kistler et al., 1986 |
| Z-13   | 37.878   | -119.345  | 0.70630 | Kistler et al., 1986 |
| Z-36   | 37.881   | -119.401  | 0.70630 | Kistler et al., 1986 |
| Z-14   | 37.881   | -119.318  | 0.70630 | Kistler et al., 1986 |
| Z-30   | 37.840   | -119.450  | 0.70640 | Kistler et al., 1986 |
| Z-32   | 37.846   | -119.445  | 0.70640 | Kistler et al., 1986 |

|       |        |          |         |                                         |
|-------|--------|----------|---------|-----------------------------------------|
| Z-9   | 37.850 | -119.441 | 0.70640 | Kistler et al., 1986                    |
| Z-34  | 37.854 | -119.439 | 0.70640 | Kistler et al., 1986                    |
| Z-61  | 37.866 | -119.456 | 0.70640 | Kistler et al., 1986                    |
| Z-62  | 37.868 | -119.448 | 0.70640 | Kistler et al., 1986                    |
| Z-11  | 37.877 | -119.393 | 0.70640 | Kistler et al., 1986                    |
| Z-12  | 37.878 | -119.355 | 0.70640 | Kistler et al., 1986                    |
| Z-40  | 37.878 | -119.349 | 0.70640 | Kistler et al., 1986                    |
| Z-42  | 37.879 | -119.303 | 0.70640 | Kistler et al., 1986                    |
| Z-29  | 37.837 | -119.454 | 0.70650 | Kistler et al., 1986                    |
| Z-31  | 37.844 | -119.447 | 0.70650 | Kistler et al., 1986                    |
| Z-33  | 37.848 | -119.443 | 0.70650 | Kistler et al., 1986                    |
| Z-20  | 37.865 | -119.431 | 0.70650 | Kistler et al., 1986                    |
| Z-35  | 37.874 | -119.423 | 0.70650 | Kistler et al., 1986                    |
| Z-38  | 37.874 | -119.377 | 0.70650 | Kistler et al., 1986                    |
| Z-41  | 37.881 | -119.301 | 0.70650 | Kistler et al., 1986                    |
| Z-19  | 37.873 | -119.368 | 0.70660 | Kistler et al., 1986                    |
| Z-39  | 37.874 | -119.374 | 0.70660 | Kistler et al., 1986                    |
| Z-53  | 37.855 | -119.485 | 0.70590 | Kistler et al., 1986                    |
| Z-58  | 37.852 | -119.474 | 0.70630 | Kistler et al., 1986                    |
| Z-10  | 37.877 | -119.413 | 0.70640 | Kistler et al., 1986                    |
| Z-10  | 37.877 | -119.413 | 0.70640 | Kistler et al., 1986                    |
| Z-10  | 37.877 | -119.413 | 0.70640 | Kistler et al., 1986                    |
| Z-63  | 37.870 | -119.440 | 0.70650 | Kistler et al., 1986                    |
| Z-18  | 37.873 | -119.368 | 0.70660 | Kistler et al., 1986                    |
| W10   | 36.718 | -119.357 | 0.70367 | Chen & Tilton, 1991; Chen & Moore, 1982 |
| W29   | 36.405 | -119.053 | 0.70370 | Chen & Tilton, 1991; Chen & Moore, 1982 |
| W22   | 36.725 | -119.292 | 0.70404 | Chen & Tilton, 1991; Chen & Moore, 1982 |
| W30   | 36.393 | -118.963 | 0.70412 | Chen & Tilton, 1991; Chen & Moore, 1982 |
| W12A  | 36.722 | -119.307 | 0.70413 | Chen & Tilton, 1991; Chen & Moore, 1982 |
| W31   | 36.412 | -118.937 | 0.70494 | Chen & Tilton, 1991; Chen & Moore, 1982 |
| W3    | 36.747 | -119.060 | 0.70524 | Chen & Tilton, 1991; Chen & Moore, 1982 |
| W6    | 36.722 | -118.970 | 0.70530 | Chen & Tilton, 1991; Chen & Moore, 1982 |
| W4    | 36.770 | -119.120 | 0.70565 | Chen & Tilton, 1991; Chen & Moore, 1982 |
| W5    | 36.748 | -119.228 | 0.70580 | Chen & Tilton, 1991; Chen & Moore, 1982 |
| OW4   | 36.770 | -118.348 | 0.70641 | Chen & Tilton, 1991; Chen & Moore, 1982 |
| SQ48A | 36.723 | -118.807 | 0.70681 | Chen & Tilton, 1991; Chen & Moore, 1982 |
| KC14  | 36.780 | -118.618 | 0.70698 | Chen & Tilton, 1991; Chen & Moore, 1982 |
| SQ13A | 36.640 | -118.805 | 0.70707 | Chen & Tilton, 1991; Chen & Moore, 1982 |
| OW6   | 36.785 | -118.315 | 0.70708 | Chen & Tilton, 1991; Chen & Moore, 1982 |
| SQ7   | 36.561 | -118.772 | 0.70722 | Chen & Tilton, 1991; Chen & Moore, 1982 |
| E27-9 | 36.845 | -118.060 | 0.70722 | Chen & Tilton, 1991; Chen & Moore, 1982 |
| SQ67  | 36.718 | -118.717 | 0.70724 | Chen & Tilton, 1991; Chen & Moore, 1982 |

|        |        |          |         |                                         |
|--------|--------|----------|---------|-----------------------------------------|
| KC15   | 36.797 | -118.675 | 0.70726 | Chen & Tilton, 1991; Chen & Moore, 1982 |
| KC6    | 36.830 | -118.870 | 0.70728 | Chen & Tilton, 1991; Chen & Moore, 1982 |
| OW19   | 36.905 | -118.162 | 0.70730 | Chen & Tilton, 1991; Chen & Moore, 1982 |
| KC16   | 36.810 | -118.760 | 0.70739 | Chen & Tilton, 1991; Chen & Moore, 1982 |
| SQ75   | 36.582 | -118.753 | 0.70751 | Chen & Tilton, 1991; Chen & Moore, 1982 |
| SQ8A   | 36.603 | -118.720 | 0.70784 | Chen & Tilton, 1991; Chen & Moore, 1982 |
| KC13   | 36.798 | -118.572 | 0.70788 | Chen & Tilton, 1991; Chen & Moore, 1982 |
| OW40   | 36.562 | -118.292 | 0.70797 | Chen & Tilton, 1991; Chen & Moore, 1982 |
| UB-1a  | 36.984 | -118.407 | 0.70619 | Frost & Mahood, 1987                    |
| 80FL   | 37.146 | -118.583 | 0.70636 | Frost & Mahood, 1987                    |
| 6a     | 37.210 | -118.644 | 0.70639 | Frost & Mahood, 1987                    |
| 76a    | 37.143 | -118.581 | 0.70652 | Frost & Mahood, 1987                    |
| 20a    | 37.172 | -118.564 | 0.70658 | Frost & Mahood, 1987                    |
| 15a    | 37.234 | -118.659 | 0.70679 | Frost & Mahood, 1987                    |
| CR-5   | 37.200 | -119.117 | 0.70899 | Hill et al., 1988                       |
| CR-29  | 37.217 | -119.150 | 0.70811 | Hill et al., 1988                       |
| CR-3   | 37.233 | -119.161 | 0.70869 | Hill et al., 1988                       |
| KPc-42 | 37.353 | -119.133 | 0.70874 | Hill et al., 1988                       |
| KPb-59 | 37.414 | -119.100 | 0.70897 | Hill et al., 1988                       |
| EP-10  | 37.085 | -119.010 | 0.70945 | Hill et al., 1988                       |
| KPa-66 | 37.425 | -119.181 | 0.70925 | Hill et al., 1988                       |
| KPd-72 | 37.306 | -119.022 | 0.70878 | Hill et al., 1988                       |
| E83    | 37.108 | -119.044 | 0.70872 | Hill et al., 1988                       |
| C1     | 37.085 | -119.017 | 0.70908 | Hill et al., 1988                       |
| BC     | 35.327 | -120.260 | 0.70790 | Kistler & Champion, 2001                |
| MP-2   | 36.622 | -121.909 | 0.70812 | Kistler & Champion, 2001                |
| LP-1   | 35.409 | -120.567 | 0.70840 | Kistler & Champion, 2001                |
| CC-3   | 34.544 | -118.535 | 0.70920 | Kistler & Champion, 2001                |
| AC-8   | 35.299 | -120.261 | 0.71280 | Kistler & Champion, 2001                |
| WS     | 34.500 | -118.500 | 0.71360 | Kistler & Champion, 2001                |
| GR-129 | 36.338 | -117.475 | 0.70610 | Kistler & Lee, 1989                     |
| GR-130 | 36.340 | -117.481 | 0.70630 | Kistler & Lee, 1989                     |
| GR-131 | 36.324 | -117.686 | 0.70760 | Kistler & Lee, 1989                     |
| GR-132 | 36.317 | -117.676 | 0.70780 | Kistler & Lee, 1989                     |
| GR-133 | 36.039 | -116.676 | 0.70700 | Kistler & Lee, 1989                     |
| GR-134 | 36.044 | -116.674 | 0.70860 | Kistler & Lee, 1989                     |
| GR-135 | 36.115 | -116.542 | 0.70840 | Kistler & Lee, 1989                     |
| GR-136 | 36.103 | -116.558 | 0.70960 | Kistler & Lee, 1989                     |
| GR-137 | 35.790 | -116.333 | 0.71030 | Kistler & Lee, 1989                     |
| GR-138 | 35.788 | -116.325 | 0.71090 | Kistler & Lee, 1989                     |
| GR-143 | 35.300 | -115.539 | 0.71070 | Kistler & Lee, 1989                     |
| GR-144 | 35.314 | -115.814 | 0.70990 | Kistler & Lee, 1989                     |

|        |        |          |         |                       |
|--------|--------|----------|---------|-----------------------|
| GR-145 | 35.408 | -115.786 | 0.70980 | Kistler & Lee, 1989   |
| GR-146 | 35.411 | -115.139 | 0.70990 | Kistler & Lee, 1989   |
| GR-147 | 35.186 | -116.161 | 0.75400 | Kistler & Lee, 1989   |
| GR-148 | 35.196 | -116.683 | 0.75400 | Kistler & Lee, 1989   |
| GR-149 | 35.542 | -117.676 | 0.70800 | Kistler & Lee, 1989   |
| GR-150 | 35.521 | -117.906 | 0.70800 | Kistler & Lee, 1989   |
| GR-151 | 35.372 | -117.926 | 0.70360 | Kistler & Lee, 1989   |
| GR-152 | 35.368 | -117.056 | 0.70340 | Kistler & Lee, 1989   |
| GR-153 | 34.458 | -117.076 | 0.70790 | Kistler & Lee, 1989   |
| GR-154 | 34.468 | -117.282 | 0.70690 | Kistler & Lee, 1989   |
| GR-155 | 34.543 | -117.293 | 0.70910 | Kistler & Lee, 1989   |
| GR-156 | 34.546 | -117.904 | 0.70910 | Kistler & Lee, 1989   |
| GR-157 | 34.557 | -116.908 | 0.71855 | Kistler & Lee, 1989   |
| GR-158 | 34.551 | -116.824 | 0.71938 | Kistler & Lee, 1989   |
| GR-159 | 34.575 | -116.817 | 0.70960 | Kistler & Lee, 1989   |
| GR-160 | 34.574 | -116.510 | 0.70890 | Kistler & Lee, 1989   |
| GR-167 | 33.456 | -115.117 | 0.70830 | Kistler & Lee, 1989   |
| GR-168 | 33.476 | -115.804 | 0.70880 | Kistler & Lee, 1989   |
| GR-169 | 33.711 | -115.822 | 0.71870 | Kistler & Lee, 1989   |
| GR-170 | 33.728 | -115.657 | 0.71380 | Kistler & Lee, 1989   |
| GR-171 | 34.065 | -114.671 | 0.70650 | Kistler & Lee, 1989   |
| GR-172 | 34.079 | -114.183 | 0.70650 | Kistler & Lee, 1989   |
| GR-173 | 34.081 | -115.201 | 0.71040 | Kistler & Lee, 1989   |
| GR-174 | 34.040 | -115.415 | 0.71040 | Kistler & Lee, 1989   |
| GR-175 | 34.094 | -115.460 | 0.70990 | Kistler & Lee, 1989   |
| GR-176 | 34.108 | -115.693 | 0.71350 | Kistler & Lee, 1989   |
| SCC-25 | 38.780 | -120.740 | 0.70320 | Kistler & Fleck, 1994 |
| Scc-1  | 38.860 | -120.580 | 0.70340 | Kistler & Fleck, 1994 |
| BR8    | 39.570 | -121.200 | 0.70360 | Kistler & Fleck, 1994 |
| BR1    | 39.570 | -121.340 | 0.70360 | Kistler & Fleck, 1994 |
| BR13   | 39.640 | -121.270 | 0.70360 | Kistler & Fleck, 1994 |
| CL-1   | 36.860 | -119.470 | 0.70380 | Kistler & Fleck, 1994 |
| BR3    | 39.740 | -121.130 | 0.70380 | Kistler & Fleck, 1994 |
| SCC-29 | 38.730 | -120.680 | 0.70400 | Kistler & Fleck, 1994 |
| FD-20  | 37.190 | -119.860 | 0.70420 | Kistler & Fleck, 1994 |
| WV-1   | 36.940 | -119.460 | 0.70430 | Kistler & Fleck, 1994 |
| SCC-5  | 38.570 | -120.610 | 0.70470 | Kistler & Fleck, 1994 |
| SCC-33 | 38.820 | -120.400 | 0.70500 | Kistler & Fleck, 1994 |
| SCD-6  | 38.930 | -120.060 | 0.70530 | Kistler & Fleck, 1994 |
| K46-64 | 37.740 | -119.490 | 0.70564 | Kistler & Fleck, 1994 |
| SCD-11 | 38.830 | -120.110 | 0.70580 | Kistler & Fleck, 1994 |
| FD-2   | 36.840 | -117.960 | 0.70590 | Kistler & Fleck, 1994 |

|          |        |          |         |                          |
|----------|--------|----------|---------|--------------------------|
| Kpv-1    | 37.940 | -119.840 | 0.70600 | Kistler & Fleck, 1994    |
| SCD-14   | 38.730 | -120.250 | 0.70600 | Kistler & Fleck, 1994    |
| 12       | 37.832 | -119.583 | 0.70604 | Kistler & Fleck, 1994    |
| 13       | 37.805 | -119.558 | 0.70607 | Kistler & Fleck, 1994    |
| MT-1     | 37.440 | -118.670 | 0.70610 | Kistler & Fleck, 1994    |
| JB-1     | 37.100 | -119.320 | 0.70650 | Kistler & Fleck, 1994    |
| Kmg41a   | 37.180 | -118.920 | 0.70650 | Kistler & Fleck, 1994    |
| SSr-T1   | 37.740 | -119.490 | 0.70650 | Kistler & Fleck, 1994    |
| K5-64    | 37.860 | -119.690 | 0.70658 | Kistler & Fleck, 1994    |
| 78-17    | 35.420 | -117.580 | 0.70660 | Kistler & Fleck, 1994    |
| 78-4     | 35.730 | -118.570 | 0.70660 | Kistler & Fleck, 1994    |
| PapFla   | 37.000 | -117.980 | 0.70660 | Kistler & Fleck, 1994    |
| MG-1     | 37.060 | -118.570 | 0.70660 | Kistler & Fleck, 1994    |
| K37-67   | 37.770 | -119.550 | 0.70668 | Kistler & Fleck, 1994    |
| SCH-8    | 38.090 | -120.080 | 0.70670 | Kistler & Fleck, 1994    |
| FD-3     | 36.760 | -117.980 | 0.70690 | Kistler & Fleck, 1994    |
| SLB-93X3 | 37.090 | -119.190 | 0.70750 | Kistler & Fleck, 1994    |
| Kdc20a   | 37.090 | -119.190 | 0.70750 | Kistler & Fleck, 1994    |
| EAGPK91  | 37.210 | -119.030 | 0.70750 | Kistler & Fleck, 1994    |
| BNPK-1   | 37.740 | -118.370 | 0.70770 | Kistler & Fleck, 1994    |
| EAGPK54  | 37.210 | -119.030 | 0.70790 | Kistler & Fleck, 1994    |
| EAGPK97  | 37.210 | -119.030 | 0.70810 | Kistler & Fleck, 1994    |
| R-99     | 37.030 | -118.620 | 0.70930 | Kistler & Fleck, 1994    |
| PF98     | 36.980 | -118.090 | 0.71030 | Kistler & Fleck, 1994    |
| BC-C-24  | 37.320 | -118.110 | 0.71210 | Kistler & Fleck, 1994    |
| 6        | 38.720 | -120.500 | 0.70320 | Kistler & Peterman, 1973 |
| 4        | 39.100 | -119.970 | 0.70490 | Kistler & Peterman, 1973 |
| 11       | 38.090 | -119.530 | 0.70540 | Kistler & Peterman, 1973 |
| 7        | 38.350 | -119.750 | 0.70560 | Kistler & Peterman, 1973 |
| 17       | 37.210 | -119.260 | 0.70570 | Kistler & Peterman, 1973 |
| 12       | 37.970 | -119.650 | 0.70600 | Kistler & Peterman, 1973 |
| 13       | 37.960 | -119.540 | 0.70610 | Kistler & Peterman, 1973 |
| 8        | 38.280 | -119.830 | 0.70620 | Kistler & Peterman, 1973 |
| 23       | 36.090 | -118.450 | 0.70640 | Kistler & Peterman, 1973 |
| 10       | 37.910 | -119.220 | 0.70650 | Kistler & Peterman, 1973 |
| 19       | 37.030 | -117.970 | 0.70660 | Kistler & Peterman, 1973 |
| 22       | 36.420 | -118.120 | 0.70680 | Kistler & Peterman, 1973 |
| 21       | 36.470 | -118.620 | 0.70700 | Kistler & Peterman, 1973 |
| 20       | 36.770 | -117.890 | 0.70700 | Kistler & Peterman, 1973 |
| 18       | 37.230 | -119.030 | 0.70710 | Kistler & Peterman, 1973 |
| 24       | 35.800 | -118.380 | 0.70810 | Kistler & Peterman, 1973 |
| 27       | 36.440 | -121.950 | 0.70820 | Kistler & Peterman, 1973 |

|            |        |          |         |                                         |
|------------|--------|----------|---------|-----------------------------------------|
| 31         | 36.590 | -121.480 | 0.70820 | Kistler & Peterman, 1973                |
| 30         | 36.750 | -118.010 | 0.70940 | Kistler & Peterman, 1973                |
| 28         | 37.140 | -120.200 | 0.70320 | Kistler & Peterman, 1973; DePaolo, 1981 |
| 2          | 40.520 | -120.800 | 0.70370 | Kistler & Peterman, 1973; DePaolo, 1981 |
| 5          | 38.950 | -119.980 | 0.70430 | Kistler & Peterman, 1973; DePaolo, 1981 |
| 29         | 37.040 | -119.700 | 0.70440 | Kistler & Peterman, 1973; DePaolo, 1981 |
| 15         | 37.850 | -119.920 | 0.70470 | Kistler & Peterman, 1973; DePaolo, 1981 |
| 3          | 39.750 | -120.180 | 0.70480 | Kistler & Peterman, 1973; DePaolo, 1981 |
| 26         | 35.600 | -117.910 | 0.70490 | Kistler & Peterman, 1973; DePaolo, 1981 |
| 9          | 37.910 | -118.830 | 0.70520 | Kistler & Peterman, 1973; DePaolo, 1981 |
| 14         | 37.970 | -119.430 | 0.70650 | Kistler & Peterman, 1973; DePaolo, 1981 |
| A6         | 35.373 | -117.262 | 0.70410 | Kistler & Peterman, 1973; DePaolo, 1981 |
| Sr19-73    | 35.539 | -117.557 | 0.70410 | Kistler & Peterman, 1978                |
| COS10-2    | 36.045 | -117.848 | 0.70410 | Kistler & Peterman, 1978                |
| Sr14-73    | 35.050 | -118.420 | 0.70485 | Kistler & Peterman, 1978                |
| COS13-42-2 | 35.986 | -117.818 | 0.70600 | Kistler & Peterman, 1978                |
| A3         | 35.308 | -117.334 | 0.70640 | Kistler & Peterman, 1978                |
| Sr17-73    | 35.348 | -117.646 | 0.70660 | Kistler & Peterman, 1978                |
| Sr11-73    | 35.034 | -117.957 | 0.70770 | Kistler & Peterman, 1978                |
| Sr18-73    | 35.516 | -117.552 | 0.70810 | Kistler & Peterman, 1978                |
| Sr3-73     | 35.681 | -118.695 | 0.70325 | Kistler & Peterman, 1978                |
| Sr1-73     | 35.688 | -118.913 | 0.70382 | Kistler & Peterman, 1978                |
| Sr2-73     | 35.700 | -118.800 | 0.70434 | Kistler & Peterman, 1978                |
| Sr5-73     | 35.706 | -118.548 | 0.70530 | Kistler & Peterman, 1978                |
| Sr4-73     | 35.710 | -118.625 | 0.70656 | Kistler & Peterman, 1978                |
| TC-40      | 35.206 | -118.476 | 0.70704 | Kistler & Ross, 1990                    |
| TC-27      | 35.206 | -118.476 | 0.70730 | Kistler & Ross, 1990                    |
| GR-152     | 35.343 | -117.931 | 0.70362 | Kistler & Ross, 1990                    |
| GR-151     | 35.357 | -117.919 | 0.70362 | Kistler & Ross, 1990                    |
| S31-84     | 35.418 | -117.849 | 0.70362 | Kistler & Ross, 1990                    |
| S28-84     | 35.426 | -117.865 | 0.70362 | Kistler & Ross, 1990                    |
| DR-6391    | 35.607 | -117.958 | 0.70362 | Kistler & Ross, 1990                    |
| DR-6179    | 35.663 | -117.952 | 0.70362 | Kistler & Ross, 1990                    |
| DR-6226    | 35.714 | -118.045 | 0.70362 | Kistler & Ross, 1990                    |
| DR-6123    | 35.981 | -118.952 | 0.70366 | Kistler & Ross, 1990                    |
| DR-5980    | 35.765 | -118.715 | 0.70382 | Kistler & Ross, 1990                    |
| DR-6061    | 35.874 | -118.874 | 0.70382 | Kistler & Ross, 1990                    |
| DR-6079A   | 35.808 | -118.784 | 0.70390 | Kistler & Ross, 1990                    |
| DR-6024    | 35.869 | -118.806 | 0.70390 | Kistler & Ross, 1990                    |
| DR-6106    | 35.904 | -118.923 | 0.70390 | Kistler & Ross, 1990                    |
| DR-6096    | 35.767 | -118.859 | 0.70391 | Kistler & Ross, 1990                    |
| DR-6220    | 35.745 | -118.030 | 0.70396 | Kistler & Ross, 1990                    |

|           |        |          |         |                      |
|-----------|--------|----------|---------|----------------------|
| DR-6176A  | 35.692 | -117.968 | 0.70398 | Kistler & Ross, 1990 |
| DR-6174D  | 35.660 | -117.951 | 0.70400 | Kistler & Ross, 1990 |
| DR-6093   | 35.781 | -118.765 | 0.70403 | Kistler & Ross, 1990 |
| DR-6400   | 35.687 | -117.981 | 0.70407 | Kistler & Ross, 1990 |
| DR-6030   | 35.892 | -118.739 | 0.70408 | Kistler & Ross, 1990 |
| DR-6117   | 35.977 | -118.872 | 0.70411 | Kistler & Ross, 1990 |
| DR-6314-1 | 35.752 | -118.830 | 0.70414 | Kistler & Ross, 1990 |
| DR-6088   | 35.812 | -118.834 | 0.70417 | Kistler & Ross, 1990 |
| DR-6321   | 35.690 | -118.898 | 0.70421 | Kistler & Ross, 1990 |
| DR-6356   | 35.671 | -118.915 | 0.70424 | Kistler & Ross, 1990 |
| DR-3631   | 35.270 | -118.734 | 0.70427 | Kistler & Ross, 1990 |
| DR-6385A  | 35.623 | -117.921 | 0.70428 | Kistler & Ross, 1990 |
| DR-6438A  | 35.632 | -117.904 | 0.70428 | Kistler & Ross, 1990 |
| DR-6439   | 35.632 | -117.904 | 0.70428 | Kistler & Ross, 1990 |
| DR-4184   | 35.445 | -118.813 | 0.70430 | Kistler & Ross, 1990 |
| DR-3635   | 35.258 | -118.700 | 0.70443 | Kistler & Ross, 1990 |
| DR-6297   | 35.628 | -118.819 | 0.70459 | Kistler & Ross, 1990 |
| DR-6300   | 35.622 | -118.865 | 0.70471 | Kistler & Ross, 1990 |
| DR-6373   | 35.537 | -118.656 | 0.70478 | Kistler & Ross, 1990 |
| DR-6336   | 35.593 | -118.838 | 0.70480 | Kistler & Ross, 1990 |
| DR-6292   | 35.618 | -118.677 | 0.70490 | Kistler & Ross, 1990 |
| DR-3791   | 35.038 | -118.591 | 0.70497 | Kistler & Ross, 1990 |
| DR-6359   | 35.627 | -118.630 | 0.70503 | Kistler & Ross, 1990 |
| DR-3858   | 35.317 | -118.559 | 0.70512 | Kistler & Ross, 1990 |
| DR-6509A  | 35.831 | -118.115 | 0.70512 | Kistler & Ross, 1990 |
| DR-3837   | 35.137 | -118.678 | 0.70591 | Kistler & Ross, 1990 |
| DR-4281   | 35.397 | -118.470 | 0.70593 | Kistler & Ross, 1990 |
| DR-5421   | 35.613 | -118.380 | 0.70593 | Kistler & Ross, 1990 |
| DR-3575   | 35.059 | -118.627 | 0.70600 | Kistler & Ross, 1990 |
| DR-5153   | 35.492 | -118.395 | 0.70608 | Kistler & Ross, 1990 |
| DR-5423   | 35.746 | -118.551 | 0.70616 | Kistler & Ross, 1990 |
| DR-5852   | 35.925 | -118.545 | 0.70616 | Kistler & Ross, 1990 |
| DR-4995   | 35.976 | -118.548 | 0.70616 | Kistler & Ross, 1990 |
| DR-5034   | 35.982 | -118.464 | 0.70616 | Kistler & Ross, 1990 |
| DR-5974   | 35.797 | -118.691 | 0.70618 | Kistler & Ross, 1990 |
| DR-5946   | 35.807 | -118.647 | 0.70618 | Kistler & Ross, 1990 |
| DR-5965   | 35.836 | -118.652 | 0.70618 | Kistler & Ross, 1990 |
| DR-5285   | 35.836 | -118.528 | 0.70618 | Kistler & Ross, 1990 |
| DR-5922   | 35.863 | -118.606 | 0.70618 | Kistler & Ross, 1990 |
| DR-5801R  | 35.875 | -118.650 | 0.70618 | Kistler & Ross, 1990 |
| DR-5887   | 35.908 | -118.655 | 0.70618 | Kistler & Ross, 1990 |
| DR-5871   | 35.925 | -118.658 | 0.70618 | Kistler & Ross, 1990 |

|          |        |          |         |                      |
|----------|--------|----------|---------|----------------------|
| DR-4692  | 36.104 | -118.467 | 0.70623 | Kistler & Ross, 1990 |
| DR-5062  | 35.788 | -118.562 | 0.70628 | Kistler & Ross, 1990 |
| DR-5017  | 35.808 | -118.577 | 0.70628 | Kistler & Ross, 1990 |
| DR-6245  | 35.722 | -118.603 | 0.70638 | Kistler & Ross, 1990 |
| DR-6269  | 35.736 | -118.653 | 0.70644 | Kistler & Ross, 1990 |
| DR-5407  | 35.767 | -118.268 | 0.70645 | Kistler & Ross, 1990 |
| DR-5425  | 35.739 | -118.565 | 0.70653 | Kistler & Ross, 1990 |
| DR-5089  | 35.498 | -118.422 | 0.70671 | Kistler & Ross, 1990 |
| DR-5261  | 35.598 | -118.583 | 0.70675 | Kistler & Ross, 1990 |
| DR-6208  | 35.655 | -117.888 | 0.70675 | Kistler & Ross, 1990 |
| DR-6535  | 35.729 | -117.981 | 0.70679 | Kistler & Ross, 1990 |
| DR-4294  | 35.435 | -118.423 | 0.70680 | Kistler & Ross, 1990 |
| DR-5865A | 35.952 | -118.634 | 0.70681 | Kistler & Ross, 1990 |
| DR-6415  | 35.685 | -117.883 | 0.70682 | Kistler & Ross, 1990 |
| DR-5403  | 35.834 | -118.269 | 0.70687 | Kistler & Ross, 1990 |
| S67-84   | 35.884 | -118.019 | 0.70718 | Kistler & Ross, 1990 |
| DR-6472A | 35.891 | -117.921 | 0.70718 | Kistler & Ross, 1990 |
| DR-3401  | 34.805 | -118.868 | 0.70727 | Kistler & Ross, 1990 |
| DR-3466  | 34.852 | -118.750 | 0.70727 | Kistler & Ross, 1990 |
| DR-3752  | 35.038 | -118.360 | 0.70727 | Kistler & Ross, 1990 |
| DR-6539  | 35.778 | -117.950 | 0.70731 | Kistler & Ross, 1990 |
| DR-3088  | 34.857 | -118.932 | 0.70741 | Kistler & Ross, 1990 |
| DR-4102A | 35.201 | -118.446 | 0.70746 | Kistler & Ross, 1990 |
| DR-5133R | 35.990 | -118.405 | 0.70762 | Kistler & Ross, 1990 |
| DR-4314  | 35.337 | -118.376 | 0.70766 | Kistler & Ross, 1990 |
| DR-5006  | 35.883 | -118.535 | 0.70767 | Kistler & Ross, 1990 |
| DR-4763  | 35.669 | -118.441 | 0.70773 | Kistler & Ross, 1990 |
| DR-3737  | 35.032 | -118.440 | 0.70777 | Kistler & Ross, 1990 |
| DR-4354  | 35.417 | -118.357 | 0.70782 | Kistler & Ross, 1990 |
| DR-3534B | 34.955 | -118.535 | 0.70786 | Kistler & Ross, 1990 |
| DR-3818  | 34.979 | -118.366 | 0.70786 | Kistler & Ross, 1990 |
| DR-3733A | 34.995 | -118.454 | 0.70786 | Kistler & Ross, 1990 |
| DR-3745  | 35.014 | -118.420 | 0.70786 | Kistler & Ross, 1990 |
| DR-3740  | 35.023 | -118.407 | 0.70786 | Kistler & Ross, 1990 |
| DR-3746  | 35.032 | -118.397 | 0.70786 | Kistler & Ross, 1990 |
| DR-3747A | 35.040 | -118.382 | 0.70786 | Kistler & Ross, 1990 |
| DR-5191A | 35.593 | -118.231 | 0.70790 | Kistler & Ross, 1990 |
| DR-4402  | 35.376 | -118.120 | 0.70793 | Kistler & Ross, 1990 |
| DR-4341  | 35.471 | -118.247 | 0.70800 | Kistler & Ross, 1990 |
| DR-4528  | 35.305 | -118.102 | 0.70813 | Kistler & Ross, 1990 |
| DR-4093  | 35.213 | -118.113 | 0.70818 | Kistler & Ross, 1990 |
| DR-3221  | 34.826 | -118.936 | 0.70846 | Kistler & Ross, 1990 |

|           |        |          |         |                          |
|-----------|--------|----------|---------|--------------------------|
| DR-3005   | 34.882 | -119.297 | 0.70846 | Kistler & Ross, 1990     |
| DR-3756A  | 35.008 | -118.345 | 0.70850 | Kistler & Ross, 1990     |
| DR-3829A  | 34.993 | -118.395 | 0.70855 | Kistler & Ross, 1990     |
| NM-30     | 35.808 | -117.917 | 0.70880 | Kistler & Ross, 1990     |
| NM-31     | 35.808 | -117.917 | 0.70880 | Kistler & Ross, 1990     |
| NM-4A     | 35.814 | -117.934 | 0.70880 | Kistler & Ross, 1990     |
| NM-4B     | 35.814 | -117.934 | 0.70880 | Kistler & Ross, 1990     |
| DR-5071   | 35.591 | -118.417 | 0.70896 | Kistler & Ross, 1990     |
| DR-3427B  | 35.038 | -118.639 | 0.70562 | Kistler & Ross, 1990     |
| DR-4181   | 35.477 | -118.653 | 0.70425 | Kistler & Ross, 1990     |
| DR-4189   | 35.461 | -118.790 | 0.70449 | Kistler & Ross, 1990     |
| TC-15     | 35.217 | -118.528 | 0.70583 | Kistler & Ross, 1990     |
| CM-25     | 35.206 | -118.674 | 0.70591 | Kistler & Ross, 1990     |
| DR-3670   | 35.182 | -118.676 | 0.70601 | Kistler & Ross, 1990     |
| DR-5008   | 35.856 | -118.538 | 0.70618 | Kistler & Ross, 1990     |
| DR-4796-1 | 35.611 | -118.497 | 0.70619 | Kistler & Ross, 1990     |
| DR-5031   | 35.956 | -118.470 | 0.70625 | Kistler & Ross, 1990     |
| DR-4789A  | 35.650 | -118.476 | 0.70626 | Kistler & Ross, 1990     |
| CM-26     | 35.131 | -118.644 | 0.70637 | Kistler & Ross, 1990     |
| DR-4848   | 35.670 | -118.357 | 0.70639 | Kistler & Ross, 1990     |
| DR-5236   | 35.667 | -118.594 | 0.70677 | Kistler & Ross, 1990     |
| DR-3181   | 34.840 | -119.060 | 0.70742 | Kistler & Ross, 1990     |
| DR-4819A  | 35.649 | -118.448 | 0.70767 | Kistler & Ross, 1990     |
| DR-3356   | 34.907 | -118.688 | 0.70786 | Kistler & Ross, 1990     |
| DR-4472   | 35.396 | -118.093 | 0.70852 | Kistler & Ross, 1990     |
| Sr16-73   | 35.355 | -117.909 | 0.70420 | Kistler & Peterman, 1978 |
| Sr6-73    | 35.547 | -118.249 | 0.70582 | Kistler & Peterman, 1978 |
| Sr20-73   | 35.870 | -117.891 | 0.70610 | Kistler & Peterman, 1978 |
| Sr10-73   | 35.326 | -118.109 | 0.70708 | Kistler & Peterman, 1978 |
| Sr8-73    | 35.507 | -118.137 | 0.70751 | Kistler & Peterman, 1978 |
| Sr9-73    | 35.344 | -118.176 | 0.70746 | Kistler & Peterman, 1978 |
| TC42      | 35.217 | -118.513 | 0.70570 | Kistler & Peterman, 1978 |
| Z-54      | 37.855 | -119.484 | 0.70580 | Kistler et al., 1986     |
| 151       | 35.372 | -117.910 | 0.70360 | Kistler & Lee, 1989      |
| 131       | 36.324 | -117.686 | 0.70760 | Kistler & Lee, 1989      |
| 149       | 35.542 | -117.693 | 0.70800 | Kistler & Lee, 1989      |
| 1         | 40.598 | -120.699 | 0.70370 | Masi et al., 1981        |
| 2         | 40.218 | -120.611 | 0.70389 | Masi et al., 1981        |
| 3         | 39.993 | -120.184 | 0.70390 | Masi et al., 1981        |
| 4         | 39.835 | -120.146 | 0.70436 | Masi et al., 1981        |
| 5         | 39.940 | -121.277 | 0.70370 | Masi et al., 1981        |
| 6         | 39.749 | -120.123 | 0.70480 | Masi et al., 1981        |

|    |        |          |         |                   |
|----|--------|----------|---------|-------------------|
| 7  | 39.658 | -120.458 | 0.70445 | Masi et al., 1981 |
| 8  | 39.393 | -121.045 | 0.70410 | Masi et al., 1981 |
| 9  | 39.361 | -120.372 | 0.70610 | Masi et al., 1981 |
| 10 | 39.178 | -120.935 | 0.70430 | Masi et al., 1981 |
| 11 | 39.139 | -119.923 | 0.70450 | Masi et al., 1981 |
| 12 | 39.016 | -119.919 | 0.70450 | Masi et al., 1981 |
| 13 | 38.862 | -120.006 | 0.70583 | Masi et al., 1981 |
| 14 | 38.649 | -119.659 | 0.70549 | Masi et al., 1981 |
| 15 | 38.752 | -120.843 | 0.70370 | Masi et al., 1981 |
| 16 | 38.620 | -120.621 | 0.70470 | Masi et al., 1981 |
| 18 | 38.324 | -119.915 | 0.70620 | Masi et al., 1981 |
| 19 | 38.327 | -119.819 | 0.70560 | Masi et al., 1981 |
| 20 | 37.972 | -120.284 | 0.70460 | Masi et al., 1981 |
| 21 | 37.798 | -119.435 | 0.70600 | Masi et al., 1981 |
| 22 | 37.870 | -119.407 | 0.70650 | Masi et al., 1981 |
| 23 | 37.825 | -119.139 | 0.70620 | Masi et al., 1981 |
| 24 | 37.883 | -119.170 | 0.70620 | Masi et al., 1981 |
| 25 | 37.940 | -119.170 | 0.70620 | Masi et al., 1981 |
| 26 | 37.835 | -118.640 | 0.70520 | Masi et al., 1981 |
| 27 | 37.747 | -119.186 | 0.70480 | Masi et al., 1981 |
| 28 | 37.747 | -119.186 | 0.70480 | Masi et al., 1981 |
| 29 | 37.747 | -119.186 | 0.70480 | Masi et al., 1981 |
| 30 | 37.747 | -119.186 | 0.70480 | Masi et al., 1981 |
| 31 | 37.643 | -119.784 | 0.70650 | Masi et al., 1981 |
| 32 | 37.680 | -119.711 | 0.70650 | Masi et al., 1981 |
| 33 | 37.813 | -119.698 | 0.70650 | Masi et al., 1981 |
| 34 | 37.876 | -119.514 | 0.70650 | Masi et al., 1981 |
| 35 | 37.843 | -119.509 | 0.70650 | Masi et al., 1981 |
| 36 | 37.801 | -119.514 | 0.70650 | Masi et al., 1981 |
| 38 | 37.421 | -117.767 | 0.70679 | Masi et al., 1981 |
| 39 | 37.434 | -119.844 | 0.70470 | Masi et al., 1981 |
| 41 | 37.320 | -119.580 | 0.70589 | Masi et al., 1981 |
| 42 | 37.414 | -119.617 | 0.70448 | Masi et al., 1981 |
| 43 | 37.235 | -119.910 | 0.70450 | Masi et al., 1981 |
| 45 | 37.128 | -119.882 | 0.70480 | Masi et al., 1981 |
| 46 | 37.357 | -119.437 | 0.70750 | Masi et al., 1981 |
| 47 | 37.154 | -120.101 | 0.70320 | Masi et al., 1981 |
| 48 | 36.969 | -118.054 | 0.70660 | Masi et al., 1981 |
| 49 | 36.942 | -119.485 | 0.70419 | Masi et al., 1981 |
| 50 | 36.564 | -118.234 | 0.70680 | Masi et al., 1981 |
| 51 | 36.457 | -119.168 | 0.70380 | Masi et al., 1981 |
| 54 | 36.115 | -118.483 | 0.70640 | Masi et al., 1981 |

|            |        |          |         |                         |
|------------|--------|----------|---------|-------------------------|
| 55         | 36.155 | -117.870 | 0.70410 | Masi et al., 1981       |
| 56         | 36.059 | -117.834 | 0.70600 | Masi et al., 1981       |
| 57         | 35.912 | -117.877 | 0.70600 | Masi et al., 1981       |
| 58         | 35.768 | -118.336 | 0.70810 | Masi et al., 1981       |
| 59         | 35.758 | -118.630 | 0.70610 | Masi et al., 1981       |
| 60         | 35.694 | -118.565 | 0.70530 | Masi et al., 1981       |
| 61         | 35.800 | -118.771 | 0.70430 | Masi et al., 1981       |
| 62         | 35.761 | -118.862 | 0.70380 | Masi et al., 1981       |
| 63         | 35.684 | -118.734 | 0.70320 | Masi et al., 1981       |
| 64         | 35.711 | -118.193 | 0.70820 | Masi et al., 1981       |
| 65         | 35.625 | -118.080 | 0.70490 | Masi et al., 1981       |
| 66         | 35.544 | -118.236 | 0.70580 | Masi et al., 1981       |
| 67         | 35.626 | -117.606 | 0.70410 | Masi et al., 1981       |
| 68         | 35.487 | -118.144 | 0.70750 | Masi et al., 1981       |
| 69         | 35.548 | -117.558 | 0.70810 | Masi et al., 1981       |
| 70         | 35.434 | -118.158 | 0.70800 | Masi et al., 1981       |
| 71         | 35.409 | -117.876 | 0.70420 | Masi et al., 1981       |
| 72         | 35.359 | -118.092 | 0.70700 | Masi et al., 1981       |
| 73         | 35.170 | -118.521 | 0.70550 | Masi et al., 1981       |
| 75         | 34.928 | -119.162 | 0.70380 | Masi et al., 1981       |
| 76         | 34.936 | -119.111 | 0.70310 | Masi et al., 1981       |
| 77         | 34.913 | -118.850 | 0.70780 | Masi et al., 1981       |
| SN-42      | 36.300 | -120.000 | 0.70450 | Masi et al., 1981       |
| SN-66      | 35.200 | -118.700 | 0.70580 | Masi et al., 1981       |
| I-66       | 34.770 | -117.150 | 0.70767 | Miller & Glazner, 1995  |
| SH-4-20-12 | 34.670 | -117.450 | 0.70891 | Miller & Glazner, 1995  |
| EPM-2      | 35.407 | -117.867 | 0.70386 | Miller et al., 1995     |
| EPM-1      | 35.422 | -117.808 | 0.70407 | Miller et al., 1995     |
| Opal-2     | 35.125 | -117.104 | 0.70413 | Miller et al., 1995     |
| EPM-3      | 35.483 | -117.688 | 0.70805 | Miller et al., 1995     |
| CM9        | 35.041 | -118.568 | 0.70721 | Pickett & Saleeby, 1994 |
| GC-8       | 35.004 | -118.759 | 0.70507 | Pickett & Saleeby, 1994 |
| GC-11      | 34.979 | -118.724 | 0.70499 | Pickett & Saleeby, 1994 |
| GC-17      | 34.998 | -118.633 | 0.70537 | Pickett & Saleeby, 1994 |
| GC-53      | 34.912 | -118.859 | 0.70433 | Pickett & Saleeby, 1994 |
| GV-1a      | 34.890 | -118.915 | 0.70501 | Pickett & Saleeby, 1994 |
| GV-3       | 34.909 | -118.921 | 0.70502 | Pickett & Saleeby, 1994 |
| PC175      | 34.925 | -118.785 | 0.70446 | Pickett & Saleeby, 1994 |
| PTC-42     | 34.950 | -118.775 | 0.70504 | Pickett & Saleeby, 1994 |
| TC-45b     | 34.949 | -118.756 | 0.70476 | Pickett & Saleeby, 1994 |
| TC-47      | 34.966 | -118.775 | 0.70482 | Pickett & Saleeby, 1994 |
| TC-49b     | 34.965 | -118.765 | 0.70546 | Pickett & Saleeby, 1994 |

|        |        |          |         |                         |
|--------|--------|----------|---------|-------------------------|
| TC-83  | 34.984 | -118.723 | 0.70491 | Pickett & Saleeby, 1994 |
| GC-1   | 35.122 | -118.726 | 0.70496 | Pickett & Saleeby, 1994 |
| GC-14  | 35.021 | -118.705 | 0.70549 | Pickett & Saleeby, 1994 |
| GC-32  | 34.920 | -118.833 | 0.70517 | Pickett & Saleeby, 1994 |
| GC-55  | 34.925 | -118.801 | 0.70540 | Pickett & Saleeby, 1994 |
| GC-60  | 34.914 | -118.791 | 0.70412 | Pickett & Saleeby, 1994 |
| TC-6   | 34.993 | -118.728 | 0.70639 | Pickett & Saleeby, 1994 |
| TC-34  | 34.985 | -118.769 | 0.70505 | Pickett & Saleeby, 1994 |
| GC-2   | 35.066 | -118.691 | 0.70666 | Pickett & Saleeby, 1994 |
| GV-14  | 34.880 | -118.897 | 0.70850 | Pickett & Saleeby, 1994 |
| TC42   | 35.230 | -118.505 | 0.70612 | Pickett & Saleeby, 1994 |
| CM-9   | 35.034 | -118.590 | 0.70677 | Kistler & Ross, 1990    |
| OC3    | 36.823 | -118.407 | 0.70560 | Saleeby et al., 1990    |
| BM684  | 35.315 | -118.645 | 0.70440 | Kistler & Ross, 1990    |
| BM-684 | 35.315 | -118.645 | 0.70440 | Kistler & Ross, 1990    |
| TC27   | 35.218 | -118.461 | 0.70731 | Saleeby et al., 1987    |
| CM620  | 35.124 | -118.739 | 0.70576 | Saleeby et al., 1987    |
| TC15   | 35.230 | -118.491 | 0.70583 | Saleeby et al., 1987    |
| TC42   | 35.228 | -118.496 | 0.70570 | Saleeby et al., 1987    |
| TC40   | 35.224 | -118.483 | 0.70703 | Saleeby et al., 1987    |
| CM25   | 35.211 | -118.663 | 0.70591 | Saleeby et al., 1987    |
| CM26   | 35.140 | -118.618 | 0.70637 | Saleeby et al., 1987    |
| CM9    | 35.041 | -118.568 | 0.70677 | Saleeby et al., 1987    |
| CM22b  | 35.184 | -118.646 | 0.70605 | Saleeby et al., 1987    |
| TL197  | 34.991 | -118.538 | 0.70496 | Saleeby et al., 1987    |
| WR84a  | 34.983 | -118.721 | 0.70499 | Saleeby et al., 1987    |
| WR86   | 34.974 | -118.729 | 0.70504 | Saleeby et al., 1987    |
| WR190  | 34.978 | -118.762 | 0.70499 | Saleeby et al., 1987    |
| PC227  | 34.971 | -118.778 | 0.70493 | Saleeby et al., 1987    |
| CM630  | 35.125 | -118.723 | 0.70472 | Saleeby et al., 1987    |
| WR643  | 35.024 | -118.707 | 0.70518 | Saleeby et al., 1987    |
| WR171  | 34.992 | -118.729 | 0.70467 | Saleeby et al., 1987    |
| WR30/2 | 34.984 | -118.725 | 0.70478 | Saleeby et al., 1987    |
| WR39   | 34.944 | -118.663 | 0.70499 | Saleeby et al., 1987    |
| PC35   | 34.919 | -118.796 | 0.70776 | Saleeby et al., 1987    |
| PC31   | 34.941 | -118.826 | 0.70519 | Saleeby et al., 1987    |
| PC32   | 34.937 | -118.819 | 0.70510 | Saleeby et al., 1987    |
| PC34   | 34.928 | -118.801 | 0.70469 | Saleeby et al., 1987    |
| PC36   | 34.916 | -118.794 | 0.70500 | Saleeby et al., 1987    |
| PC37   | 34.908 | -118.788 | 0.70469 | Saleeby et al., 1987    |
| PC129  | 34.925 | -118.912 | 0.70594 | Saleeby et al., 1987    |
| WR91a  | 34.958 | -118.719 | 0.70536 | Saleeby et al., 1987    |

|          |        |          |         |                                           |
|----------|--------|----------|---------|-------------------------------------------|
| WR40     | 34.946 | -118.678 | 0.70480 | Saleeby et al., 1987                      |
| TC12a    | 35.228 | -118.488 | 0.70682 | Saleeby et al., 1987                      |
| 6        | 37.072 | -118.370 | 0.70651 | Sawka et al., 1990                        |
| 7        | 37.072 | -118.366 | 0.70651 | Sawka et al., 1990                        |
| 21       | 37.084 | -118.421 | 0.70651 | Sawka et al., 1990                        |
| 22       | 37.084 | -118.419 | 0.70651 | Sawka et al., 1990                        |
| 2        | 37.092 | -118.388 | 0.70651 | Sawka et al., 1990                        |
| 56       | 37.063 | -118.417 | 0.70719 | Sawka et al., 1990                        |
| 58       | 37.067 | -118.418 | 0.70719 | Sawka et al., 1990                        |
| 55       | 37.070 | -118.420 | 0.70719 | Sawka et al., 1990                        |
| 5        | 37.071 | -118.446 | 0.70719 | Sawka et al., 1990                        |
| 57       | 37.075 | -118.423 | 0.70719 | Sawka et al., 1990                        |
| 67       | 37.088 | -118.461 | 0.70719 | Sawka et al., 1990                        |
| 65       | 37.094 | -118.475 | 0.70719 | Sawka et al., 1990                        |
| 70       | 37.094 | -118.473 | 0.70719 | Sawka et al., 1990                        |
| 63       | 37.094 | -118.469 | 0.70719 | Sawka et al., 1990                        |
| 72       | 37.075 | -118.425 | 0.70651 | Sawka et al., 1990; Kistler & Fleck, 1994 |
| 30       | 37.081 | -118.421 | 0.70651 | Sawka et al., 1990; Kistler & Fleck, 1994 |
| 8        | 37.061 | -118.420 | 0.70719 | Sawka et al., 1990; Kistler & Fleck, 1994 |
| 61       | 37.086 | -118.451 | 0.70719 | Sawka et al., 1990; Kistler & Fleck, 1994 |
| DR570    | 36.284 | -120.979 | 0.70880 | Kistler & Champion, 2001                  |
| DR566A   | 36.547 | -121.250 | 0.70830 | Kistler & Champion, 2001                  |
| DR584    | 36.704 | -121.543 | 0.70860 | Kistler & Champion, 2001                  |
| G1A      | 36.270 | -121.060 | 0.70830 | Kistler & Champion, 2001                  |
| DR576    | 36.323 | -121.171 | 0.70860 | Kistler & Champion, 2001                  |
| BR-6-3   | 36.793 | -121.503 | 0.70810 | Kistler & Champion, 2001                  |
| BH6-88   | 38.304 | -123.052 | 0.70671 | Kistler & Champion, 2001                  |
| BH8-88   | 38.311 | -123.061 | 0.70676 | Kistler & Champion, 2001                  |
| BH1-88   | 38.302 | -123.055 | 0.70600 | Kistler & Champion, 2001                  |
| PR7-88   | 38.186 | -122.960 | 0.70662 | Kistler & Champion, 2001                  |
| PR8-88   | 38.191 | -122.959 | 0.70662 | Kistler & Champion, 2001                  |
| PR14-88  | 38.000 | -122.974 | 0.70775 | Kistler & Champion, 2001                  |
| PR1-88   | 38.101 | -122.869 | 0.70863 | Kistler & Champion, 2001                  |
| 3Ketal73 | 37.700 | -122.999 | 0.70613 | Kistler & Champion, 2001                  |
| MON1-87  | 37.492 | -122.380 | 0.70702 | Kistler & Champion, 2001                  |
| MON9-87  | 37.493 | -122.387 | 0.70640 | Kistler & Champion, 2001                  |
| MON11-87 | 37.510 | -122.402 | 0.70640 | Kistler & Champion, 2001                  |
| MON13-87 | 37.517 | -122.479 | 0.70640 | Kistler & Champion, 2001                  |
| 4Ketal73 | 37.518 | -122.425 | 0.70640 | Kistler & Champion, 2001                  |
| MON5-88  | 37.558 | -122.508 | 0.70550 | Kistler & Champion, 2001                  |
| MON12-88 | 37.547 | -122.432 | 0.70580 | Kistler & Champion, 2001                  |
| K2-87    | 37.104 | -122.141 | 0.70565 | Kistler & Champion, 2001                  |

|            |        |          |         |                          |
|------------|--------|----------|---------|--------------------------|
| 5Ketal73   | 37.101 | -122.148 | 0.70565 | Kistler & Champion, 2001 |
| K8-87      | 37.033 | -122.109 | 0.70565 | Kistler & Champion, 2001 |
| BL7-89     | 37.033 | -122.024 | 0.70638 | Kistler & Champion, 2001 |
| BL14-89    | 37.030 | -122.075 | 0.70638 | Kistler & Champion, 2001 |
| BL9-89     | 36.991 | -122.091 | 0.71472 | Kistler & Champion, 2001 |
| SANLU1-90  | 36.499 | -121.936 | 0.70787 | Kistler & Champion, 2001 |
| SANLU14-90 | 36.579 | -121.947 | 0.70787 | Kistler & Champion, 2001 |
| SANLU7-90  | 36.383 | -121.852 | 0.70787 | Kistler & Champion, 2001 |
| SANLU20-90 | 36.433 | -121.789 | 0.70787 | Kistler & Champion, 2001 |
| SANLU25-90 | 36.369 | -121.577 | 0.70824 | Kistler & Champion, 2001 |
| SANLU16-90 | 36.515 | -121.759 | 0.70824 | Kistler & Champion, 2001 |
| SANLU18-90 | 36.467 | -121.711 | 0.70913 | Kistler & Champion, 2001 |
| SANLU10-91 | 36.210 | -121.745 | 0.71010 | Kistler & Champion, 2001 |
| SANLU11-91 | 36.200 | -121.725 | 0.70660 | Kistler & Champion, 2001 |
| SANLU12-91 | 36.187 | -121.707 | 0.70660 | Kistler & Champion, 2001 |
| DR145C     | 35.832 | -120.350 | 0.70760 | Kistler & Champion, 2001 |
| DR109      | 35.602 | -120.267 | 0.70950 | Kistler & Champion, 2001 |
| DR745      | 34.819 | -119.089 | 0.71640 | Kistler & Champion, 2001 |
| 813.1      | 36.049 | -121.492 | 0.70740 | Dickinson et al., 2005   |

§ These data are an extension of an earlier compilation by Nadin (2007).
