# Supplementary material
Source: publisher figshare collection journal article supplement (https://gsapubs.figshare.com/ndownloader/files/22398732)
Supplement: Supplementary file 1 [file 22398732 › SD_T6.pdf]

**Table SD6.** Compilation of pressures calculated from aluminum-in-hornblende barometry and conventional thermobarometry from the Sierra Nevada batholith.<sup>§</sup>

| Sample | Longitude | Latitude | P (kbar) | Reference             |
|--------|-----------|----------|----------|-----------------------|
| 1      | -118.911  | 36.817   | 4.1      | Ague & Brimhall, 1988 |
| 3      | -119.162  | 36.762   | 3.8      | Ague & Brimhall, 1988 |
| 4      | -119.116  | 36.764   | 2.9      | Ague & Brimhall, 1988 |
| 5      | -119.074  | 36.748   | 2.8      | Ague & Brimhall, 1988 |
| 6      | -119.048  | 36.743   | 2.9      | Ague & Brimhall, 1988 |
| 11     | -118.893  | 36.820   | 3.8      | Ague & Brimhall, 1988 |
| 13     | -118.864  | 36.804   | 2.9      | Ague & Brimhall, 1988 |
| 14     | -118.777  | 36.802   | 2.7      | Ague & Brimhall, 1988 |
| 15     | -118.587  | 36.778   | 1.3      | Ague & Brimhall, 1988 |
| 16     | -118.605  | 36.780   | 1.5      | Ague & Brimhall, 1988 |
| 18     | -118.710  | 36.790   | 2.4      | Ague & Brimhall, 1988 |
| 19     | -118.737  | 36.789   | 2.6      | Ague & Brimhall, 1988 |
| 21     | -118.997  | 36.405   | 2.7      | Ague & Brimhall, 1988 |
| 23     | -118.929  | 36.386   | 3.8      | Ague & Brimhall, 1988 |
| 24     | -118.900  | 36.434   | 3.6      | Ague & Brimhall, 1988 |
| 25     | -118.820  | 36.453   | 3.9      | Ague & Brimhall, 1988 |
| 26     | -118.795  | 36.442   | 3.7      | Ague & Brimhall, 1988 |
| 28     | -118.814  | 36.095   | 3.4      | Ague & Brimhall, 1988 |
| 35     | -118.560  | 36.129   | 2.3      | Ague & Brimhall, 1988 |
| 36     | -118.551  | 36.109   | 3.3      | Ague & Brimhall, 1988 |
| 38     | -118.515  | 35.968   | 3.2      | Ague & Brimhall, 1988 |
| 42     | -118.576  | 35.743   | 1.8      | Ague & Brimhall, 1988 |
| 43     | -118.600  | 35.742   | 1.9      | Ague & Brimhall, 1988 |
| 44     | -118.657  | 35.734   | 2.5      | Ague & Brimhall, 1988 |
| 45     | -118.728  | 35.709   | 2.9      | Ague & Brimhall, 1988 |
| 47     | -118.829  | 35.707   | 3.1      | Ague & Brimhall, 1988 |
| 48     | -118.705  | 35.277   | 4        | Ague & Brimhall, 1988 |
| 49     | -118.673  | 35.269   | 5.4      | Ague & Brimhall, 1988 |
| 50     | -118.591  | 35.244   | 5.3      | Ague & Brimhall, 1988 |
| 51     | -118.056  | 35.672   | 5.1      | Ague & Brimhall, 1988 |
| 56     | -119.160  | 37.931   | 0.7      | Ague & Brimhall, 1988 |
| 59     | -119.583  | 37.827   | 2.3      | Ague & Brimhall, 1988 |
| 60     | -119.222  | 37.929   | 0.5      | Ague & Brimhall, 1988 |
| 61     | -119.355  | 37.874   | 2        | Ague & Brimhall, 1988 |
| 62     | -119.373  | 37.878   | 0.4      | Ague & Brimhall, 1988 |
| 63     | -119.393  | 37.854   | 3.3      | Ague & Brimhall, 1988 |
| 64     | -119.465  | 37.828   | 2.5      | Ague & Brimhall, 1988 |
| 65     | -119.596  | 37.841   | 1.9      | Ague & Brimhall, 1988 |

|     |          |        |     |                       |
|-----|----------|--------|-----|-----------------------|
| 66  | -119.713 | 37.817 | 3.3 | Ague & Brimhall, 1988 |
| 67  | -119.767 | 37.765 | 3.8 | Ague & Brimhall, 1988 |
| 68  | -119.875 | 37.766 | 2.5 | Ague & Brimhall, 1988 |
| 69  | -119.998 | 37.833 | 0.7 | Ague & Brimhall, 1988 |
| 73  | -120.585 | 38.771 | 3.7 | Ague & Brimhall, 1988 |
| 74  | -120.570 | 38.782 | 3.7 | Ague & Brimhall, 1988 |
| 76  | -120.462 | 38.779 | 2.7 | Ague & Brimhall, 1988 |
| 77  | -120.462 | 38.779 | 2.6 | Ague & Brimhall, 1988 |
| 78  | -120.438 | 38.789 | 1.1 | Ague & Brimhall, 1988 |
| 79  | -120.407 | 38.787 | 3.7 | Ague & Brimhall, 1988 |
| 80  | -120.317 | 38.793 | 2.5 | Ague & Brimhall, 1988 |
| 81  | -120.192 | 38.795 | 1.7 | Ague & Brimhall, 1988 |
| 82  | -120.148 | 38.821 | 1.8 | Ague & Brimhall, 1988 |
| 83  | -120.071 | 38.827 | 2.9 | Ague & Brimhall, 1988 |
| 84  | -120.020 | 38.810 | 1.8 | Ague & Brimhall, 1988 |
| 85  | -119.939 | 38.791 | 1.8 | Ague & Brimhall, 1988 |
| 89  | -119.553 | 38.653 | 2.1 | Ague & Brimhall, 1988 |
| 97  | -118.250 | 37.558 | 2.1 | Ague & Brimhall, 1988 |
| 99  | -118.250 | 37.558 | 2.2 | Ague & Brimhall, 1988 |
| 103 | -118.046 | 37.338 | 1.6 | Ague & Brimhall, 1988 |
| 105 | -117.928 | 37.420 | 2.9 | Ague & Brimhall, 1988 |
| 108 | -118.349 | 37.102 | 2.5 | Ague & Brimhall, 1988 |
| 109 | -118.312 | 36.776 | 0.2 | Ague & Brimhall, 1988 |
| 111 | -118.208 | 36.573 | 2.3 | Ague & Brimhall, 1988 |
| 112 | -118.230 | 36.572 | 2.7 | Ague & Brimhall, 1988 |
| 116 | -118.614 | 37.206 | 2.7 | Ague & Brimhall, 1988 |
| 117 | -118.621 | 37.194 | 2.7 | Ague & Brimhall, 1988 |
| 118 | -118.564 | 37.159 | 2.8 | Ague & Brimhall, 1988 |
| 120 | -118.568 | 37.149 | 3.2 | Ague & Brimhall, 1988 |
| 123 | -118.547 | 37.321 | 2.3 | Ague & Brimhall, 1988 |
| 124 | -118.530 | 37.321 | 2.3 | Ague & Brimhall, 1988 |
| 128 | -120.332 | 39.345 | 0.6 | Ague & Brimhall, 1988 |
| 129 | -120.427 | 39.351 | 0.1 | Ague & Brimhall, 1988 |
| 130 | -120.625 | 39.342 | 0.9 | Ague & Brimhall, 1988 |
| 132 | -121.126 | 39.421 | 2.2 | Ague & Brimhall, 1988 |
| 133 | -121.007 | 39.510 | 3.4 | Ague & Brimhall, 1988 |
| 138 | -118.071 | 36.415 | 0.2 | Ague & Brimhall, 1988 |
| 139 | -118.110 | 36.432 | 3.5 | Ague & Brimhall, 1988 |
| 142 | -118.472 | 37.750 | 2.5 | Ague & Brimhall, 1988 |
| 145 | -118.632 | 37.856 | 4.2 | Ague & Brimhall, 1988 |
| 147 | -118.816 | 37.884 | 4.4 | Ague & Brimhall, 1988 |
| 149 | -118.882 | 37.891 | 2.5 | Ague & Brimhall, 1988 |

|     |          |        |     |                       |
|-----|----------|--------|-----|-----------------------|
| 151 | -119.197 | 38.038 | 1.2 | Ague & Brimhall, 1988 |
| 154 | -118.056 | 36.819 | 0.5 | Ague & Brimhall, 1988 |
| 155 | -118.115 | 36.845 | 1   | Ague & Brimhall, 1988 |
| 253 | -119.568 | 38.333 | 2   | Ague & Brimhall, 1988 |
| 254 | -119.590 | 38.319 | 2.2 | Ague & Brimhall, 1988 |
| 255 | -119.611 | 38.326 | 1   | Ague & Brimhall, 1988 |
| 256 | -119.686 | 38.336 | 0.2 | Ague & Brimhall, 1988 |
| 257 | -119.764 | 38.338 | 2   | Ague & Brimhall, 1988 |
| 258 | -119.784 | 38.345 | 2.1 | Ague & Brimhall, 1988 |
| 259 | -119.836 | 38.354 | 2.1 | Ague & Brimhall, 1988 |
| 260 | -119.904 | 38.364 | 2.2 | Ague & Brimhall, 1988 |
| 261 | -119.959 | 38.311 | 4.4 | Ague & Brimhall, 1988 |
| 262 | -120.013 | 38.218 | 3.3 | Ague & Brimhall, 1988 |
| 267 | -119.232 | 38.039 | 3.5 | Ague & Brimhall, 1988 |
| 268 | -118.739 | 37.452 | 2.5 | Ague & Brimhall, 1988 |
| 269 | -118.726 | 37.496 | 2.6 | Ague & Brimhall, 1988 |
| 271 | -118.695 | 37.546 | 3.9 | Ague & Brimhall, 1988 |
| 278 | -118.913 | 36.817 | 3.8 | Ague & Brimhall, 1988 |
| 279 | -118.901 | 36.818 | 3.2 | Ague & Brimhall, 1988 |
| 281 | -119.159 | 37.051 | 3.7 | Ague & Brimhall, 1988 |
| 282 | -119.160 | 37.035 | 3.3 | Ague & Brimhall, 1988 |
| 283 | -119.176 | 36.992 | 3.1 | Ague & Brimhall, 1988 |
| 284 | -119.181 | 36.942 | 3.3 | Ague & Brimhall, 1988 |
| 287 | -119.181 | 36.942 | 1.8 | Ague & Brimhall, 1988 |
| 288 | -119.194 | 36.927 | 4.4 | Ague & Brimhall, 1988 |
| 289 | -119.117 | 37.026 | 3.7 | Ague & Brimhall, 1988 |
| 293 | -119.306 | 37.134 | 4.5 | Ague & Brimhall, 1988 |
| 294 | -119.296 | 37.151 | 3.6 | Ague & Brimhall, 1988 |
| 295 | -119.249 | 37.142 | 3   | Ague & Brimhall, 1988 |
| 296 | -119.199 | 37.161 | 2.9 | Ague & Brimhall, 1988 |
| 297 | -119.212 | 37.195 | 3.4 | Ague & Brimhall, 1988 |
| 298 | -119.158 | 37.226 | 3.5 | Ague & Brimhall, 1988 |
| 299 | -119.106 | 37.282 | 3   | Ague & Brimhall, 1988 |
| 300 | -119.075 | 37.309 | 2.7 | Ague & Brimhall, 1988 |
| 301 | -119.109 | 37.311 | 4   | Ague & Brimhall, 1988 |
| 305 | -119.380 | 37.061 | 3.8 | Ague & Brimhall, 1988 |
| 310 | -119.482 | 37.078 | 3.3 | Ague & Brimhall, 1988 |
| 311 | -119.502 | 37.133 | 4.5 | Ague & Brimhall, 1988 |
| 312 | -119.492 | 37.147 | 3.4 | Ague & Brimhall, 1988 |
| 315 | -119.625 | 37.481 | 2.7 | Ague & Brimhall, 1988 |
| 316 | -119.628 | 37.395 | 1.9 | Ague & Brimhall, 1988 |
| 317 | -119.634 | 37.363 | 3.4 | Ague & Brimhall, 1988 |

|     |          |        |     |                       |
|-----|----------|--------|-----|-----------------------|
| 319 | -119.506 | 37.288 | 2.4 | Ague & Brimhall, 1988 |
| 320 | -119.504 | 37.304 | 2.9 | Ague & Brimhall, 1988 |
| 322 | -119.492 | 37.337 | 3   | Ague & Brimhall, 1988 |
| 323 | -119.473 | 37.357 | 2.9 | Ague & Brimhall, 1988 |
| 329 | -119.458 | 37.454 | 3   | Ague & Brimhall, 1988 |
| 330 | -119.440 | 37.469 | 2.1 | Ague & Brimhall, 1988 |
| 331 | -119.427 | 37.481 | 2.6 | Ague & Brimhall, 1988 |
| 332 | -119.415 | 37.484 | 3.3 | Ague & Brimhall, 1988 |
| 337 | -119.351 | 37.211 | 3.2 | Ague & Brimhall, 1988 |
| 338 | -119.338 | 37.218 | 2.5 | Ague & Brimhall, 1988 |
| 339 | -119.357 | 37.238 | 3.6 | Ague & Brimhall, 1988 |
| 340 | -119.351 | 37.250 | 2.7 | Ague & Brimhall, 1988 |
| 341 | -119.349 | 37.264 | 2   | Ague & Brimhall, 1988 |
| 343 | -119.363 | 37.332 | 2.4 | Ague & Brimhall, 1988 |
| 344 | -119.392 | 37.370 | 3.5 | Ague & Brimhall, 1988 |
| 348 | -119.267 | 37.542 | 2.5 | Ague & Brimhall, 1988 |
| 349 | -119.289 | 37.553 | 3.3 | Ague & Brimhall, 1988 |
| 353 | -119.289 | 37.553 | 4.1 | Ague & Brimhall, 1988 |
| 365 | -118.798 | 36.505 | 3.5 | Ague & Brimhall, 1988 |
| 367 | -118.776 | 36.544 | 3.6 | Ague & Brimhall, 1988 |
| 368 | -118.770 | 36.561 | 3.7 | Ague & Brimhall, 1988 |
| 369 | -118.751 | 36.589 | 2.8 | Ague & Brimhall, 1988 |
| 370 | -118.800 | 36.585 | 2.1 | Ague & Brimhall, 1988 |
| 371 | -118.809 | 36.599 | 2.9 | Ague & Brimhall, 1988 |
| 372 | -118.825 | 36.629 | 3.2 | Ague & Brimhall, 1988 |
| 373 | -118.839 | 36.651 | 3.2 | Ague & Brimhall, 1988 |
| 374 | -118.873 | 36.685 | 3   | Ague & Brimhall, 1988 |
| 375 | -118.938 | 36.702 | 2.5 | Ague & Brimhall, 1988 |
| 376 | -118.905 | 36.720 | 2.6 | Ague & Brimhall, 1988 |
| 377 | -118.904 | 36.741 | 2.9 | Ague & Brimhall, 1988 |
| 378 | -118.893 | 36.749 | 2.8 | Ague & Brimhall, 1988 |
| 379 | -118.893 | 36.749 | 3   | Ague & Brimhall, 1988 |
| 380 | -118.902 | 36.791 | 3.4 | Ague & Brimhall, 1988 |
| 381 | -118.899 | 36.240 | 3.7 | Ague & Brimhall, 1988 |
| 384 | -118.795 | 36.175 | 3.4 | Ague & Brimhall, 1988 |
| 385 | -118.755 | 36.191 | 2.8 | Ague & Brimhall, 1988 |
| 386 | -118.729 | 36.189 | 2.7 | Ague & Brimhall, 1988 |
| 387 | -118.685 | 36.191 | 3   | Ague & Brimhall, 1988 |
| 389 | -118.756 | 35.450 | 3.1 | Ague & Brimhall, 1988 |
| 390 | -118.739 | 35.465 | 4.4 | Ague & Brimhall, 1988 |
| 391 | -118.705 | 35.462 | 3.3 | Ague & Brimhall, 1988 |
| 393 | -118.621 | 35.523 | 3.6 | Ague & Brimhall, 1988 |

|          |          |        |     |                                    |
|----------|----------|--------|-----|------------------------------------|
| 394      | -118.584 | 35.539 | 4   | Ague & Brimhall, 1988              |
| 395      | -118.531 | 35.563 | 3.4 | Ague & Brimhall, 1988              |
| 397      | -118.470 | 35.669 | 4.4 | Ague & Brimhall, 1988              |
| 398      | -118.619 | 35.725 | 2   | Ague & Brimhall, 1988              |
| 401      | -118.627 | 35.767 | 0.3 | Ague & Brimhall, 1988              |
| 402      | -118.667 | 35.795 | 2.9 | Ague & Brimhall, 1988              |
| 404      | -118.594 | 35.808 | 3.6 | Ague & Brimhall, 1988              |
| 409      | -118.467 | 35.393 | 4.1 | Ague & Brimhall, 1988              |
| 410      | -118.414 | 35.410 | 5.3 | Ague & Brimhall, 1988              |
| 413      | -118.376 | 35.437 | 6   | Ague & Brimhall, 1988              |
| 420      | -118.241 | 35.354 | 5.7 | Ague & Brimhall, 1988              |
| 422      | -119.115 | 37.598 | 2.7 | Ague & Brimhall, 1988              |
| RB020601 | -118.399 | 35.092 | 4.1 | Brady et al., 2006                 |
| RB030304 | -118.385 | 35.445 | 4.4 | Brady et al., 2006                 |
| 50       | -118.600 | 35.250 | 5.7 | "Brady (Ague redo)" in Nadin, 2007 |
| 49       | -118.675 | 35.267 | 5.8 | "Brady (Ague redo)" in Nadin, 2007 |
| 48       | -118.705 | 35.279 | 4.5 | "Brady (Ague redo)" in Nadin, 2007 |
| 420      | -118.233 | 35.358 | 6.1 | "Brady (Ague redo)" in Nadin, 2007 |
| 409      | -118.470 | 35.396 | 4.6 | "Brady (Ague redo)" in Nadin, 2007 |
| 410      | -118.413 | 35.417 | 5.7 | "Brady (Ague redo)" in Nadin, 2007 |
| 413      | -118.367 | 35.446 | 6.4 | "Brady (Ague redo)" in Nadin, 2007 |
| 389      | -118.767 | 35.450 | 3.7 | "Brady (Ague redo)" in Nadin, 2007 |
| 414      | -118.358 | 35.450 | 5.3 | "Brady (Ague redo)" in Nadin, 2007 |
| 391      | -118.713 | 35.465 | 3.8 | "Brady (Ague redo)" in Nadin, 2007 |
| 390      | -118.750 | 35.467 | 4.9 | "Brady (Ague redo)" in Nadin, 2007 |
| 393      | -118.625 | 35.525 | 4.1 | "Brady (Ague redo)" in Nadin, 2007 |
| 394      | -118.583 | 35.546 | 4.5 | "Brady (Ague redo)" in Nadin, 2007 |
| 395      | -118.529 | 35.567 | 3.9 | "Brady (Ague redo)" in Nadin, 2007 |
| 397      | -118.458 | 35.671 | 4.9 | "Brady (Ague redo)" in Nadin, 2007 |
| 51       | -118.042 | 35.675 | 5.5 | "Brady (Ague redo)" in Nadin, 2007 |
| 47       | -118.829 | 35.708 | 3.7 | "Brady (Ague redo)" in Nadin, 2007 |
| 45       | -118.725 | 35.717 | 3.4 | "Brady (Ague redo)" in Nadin, 2007 |
| 398      | -118.613 | 35.733 | 2.6 | "Brady (Ague redo)" in Nadin, 2007 |
| 44       | -118.650 | 35.742 | 3.1 | "Brady (Ague redo)" in Nadin, 2007 |
| 42       | -118.567 | 35.746 | 2.4 | "Brady (Ague redo)" in Nadin, 2007 |
| 43       | -118.592 | 35.750 | 2.5 | "Brady (Ague redo)" in Nadin, 2007 |
| 401      | -118.617 | 35.767 | 1   | "Brady (Ague redo)" in Nadin, 2007 |
| 402      | -118.658 | 35.800 | 3.4 | "Brady (Ague redo)" in Nadin, 2007 |
| 404      | -118.579 | 35.813 | 4.1 | "Brady (Ague redo)" in Nadin, 2007 |
| 38       | -118.508 | 35.967 | 3.8 | "Brady (Ague redo)" in Nadin, 2007 |
| 28       | -118.817 | 36.104 | 3.9 | "Brady (Ague redo)" in Nadin, 2007 |
| 36       | -118.550 | 36.125 | 3.8 | "Brady (Ague redo)" in Nadin, 2007 |

|     |          |        |     |                                    |
|-----|----------|--------|-----|------------------------------------|
| 35  | -118.558 | 36.146 | 2.8 | "Brady (Ague redo)" in Nadin, 2007 |
| 384 | -118.796 | 36.183 | 3.9 | "Brady (Ague redo)" in Nadin, 2007 |
| 386 | -118.725 | 36.200 | 3.3 | "Brady (Ague redo)" in Nadin, 2007 |
| 385 | -118.758 | 36.204 | 3.4 | "Brady (Ague redo)" in Nadin, 2007 |
| 387 | -118.683 | 36.204 | 3.6 | "Brady (Ague redo)" in Nadin, 2007 |
| 381 | -118.904 | 36.246 | 4.2 | "Brady (Ague redo)" in Nadin, 2007 |
| 23  | -118.933 | 36.392 | 4.3 | "Brady (Ague redo)" in Nadin, 2007 |
| 21  | -119.000 | 36.408 | 3.2 | "Brady (Ague redo)" in Nadin, 2007 |
| 138 | -118.104 | 36.429 | 0.9 | "Brady (Ague redo)" in Nadin, 2007 |
| 24  | -118.896 | 36.442 | 4.1 | "Brady (Ague redo)" in Nadin, 2007 |
| 139 | -118.058 | 36.442 | 4.1 | "Brady (Ague redo)" in Nadin, 2007 |
| 26  | -118.796 | 36.454 | 4.2 | "Brady (Ague redo)" in Nadin, 2007 |
| 25  | -118.817 | 36.458 | 4.4 | "Brady (Ague redo)" in Nadin, 2007 |
| 365 | -118.796 | 36.513 | 4   | "Brady (Ague redo)" in Nadin, 2007 |
| 367 | -118.775 | 36.550 | 4.1 | "Brady (Ague redo)" in Nadin, 2007 |
| 368 | -118.767 | 36.567 | 4.2 | "Brady (Ague redo)" in Nadin, 2007 |
| 111 | -118.208 | 36.592 | 2.9 | "Brady (Ague redo)" in Nadin, 2007 |
| 112 | -118.217 | 36.592 | 3.3 | "Brady (Ague redo)" in Nadin, 2007 |
| 369 | -118.746 | 36.600 | 3.3 | "Brady (Ague redo)" in Nadin, 2007 |
| 370 | -118.804 | 36.600 | 2.7 | "Brady (Ague redo)" in Nadin, 2007 |
| 371 | -118.808 | 36.604 | 3.4 | "Brady (Ague redo)" in Nadin, 2007 |
| 372 | -118.821 | 36.638 | 3.7 | "Brady (Ague redo)" in Nadin, 2007 |
| 373 | -118.838 | 36.658 | 3.8 | "Brady (Ague redo)" in Nadin, 2007 |
| 374 | -118.875 | 36.692 | 3.6 | "Brady (Ague redo)" in Nadin, 2007 |
| 375 | -118.938 | 36.708 | 3.1 | "Brady (Ague redo)" in Nadin, 2007 |
| 1   | -119.350 | 36.717 | 4.6 | "Brady (Ague redo)" in Nadin, 2007 |
| 376 | -118.904 | 36.725 | 3.1 | "Brady (Ague redo)" in Nadin, 2007 |
| 6   | -119.050 | 36.746 | 3.4 | "Brady (Ague redo)" in Nadin, 2007 |
| 5   | -119.075 | 36.750 | 3.3 | "Brady (Ague redo)" in Nadin, 2007 |
| 377 | -118.900 | 36.750 | 3.4 | "Brady (Ague redo)" in Nadin, 2007 |
| 378 | -118.888 | 36.750 | 3.3 | "Brady (Ague redo)" in Nadin, 2007 |
| 379 | -118.888 | 36.750 | 3.5 | "Brady (Ague redo)" in Nadin, 2007 |
| 3   | -119.163 | 36.765 | 4.3 | "Brady (Ague redo)" in Nadin, 2007 |
| 4   | -119.117 | 36.767 | 3.5 | "Brady (Ague redo)" in Nadin, 2007 |
| 109 | -118.308 | 36.788 | 0.9 | "Brady (Ague redo)" in Nadin, 2007 |
| 15  | -118.583 | 36.792 | 1.9 | "Brady (Ague redo)" in Nadin, 2007 |
| 16  | -118.600 | 36.792 | 2.1 | "Brady (Ague redo)" in Nadin, 2007 |
| 18  | -118.708 | 36.800 | 2.9 | "Brady (Ague redo)" in Nadin, 2007 |
| 19  | -118.738 | 36.800 | 3.2 | "Brady (Ague redo)" in Nadin, 2007 |
| 380 | -118.904 | 36.800 | 3.9 | "Brady (Ague redo)" in Nadin, 2007 |
| 14  | -118.775 | 36.808 | 3.3 | "Brady (Ague redo)" in Nadin, 2007 |
| 278 | -118.913 | 36.817 | 4.3 | "Brady (Ague redo)" in Nadin, 2007 |

|     |          |        |     |                                    |
|-----|----------|--------|-----|------------------------------------|
| 13  | -118.875 | 36.825 | 3.5 | "Brady (Ague redo)" in Nadin, 2007 |
| 279 | -118.892 | 36.825 | 3.7 | "Brady (Ague redo)" in Nadin, 2007 |
| 11  | -118.892 | 36.833 | 4.3 | "Brady (Ague redo)" in Nadin, 2007 |
| 154 | -118.054 | 36.838 | 1.1 | "Brady (Ague redo)" in Nadin, 2007 |
| 155 | -118.113 | 36.850 | 1.6 | "Brady (Ague redo)" in Nadin, 2007 |
| 288 | -119.196 | 36.933 | 4.9 | "Brady (Ague redo)" in Nadin, 2007 |
| 284 | -119.183 | 36.942 | 3.8 | "Brady (Ague redo)" in Nadin, 2007 |
| 287 | -119.183 | 36.942 | 2.4 | "Brady (Ague redo)" in Nadin, 2007 |
| 283 | -119.175 | 36.992 | 3.6 | "Brady (Ague redo)" in Nadin, 2007 |
| 289 | -119.121 | 37.042 | 4.2 | "Brady (Ague redo)" in Nadin, 2007 |
| 282 | -119.167 | 37.050 | 3.9 | "Brady (Ague redo)" in Nadin, 2007 |
| 281 | -119.167 | 37.063 | 4.2 | "Brady (Ague redo)" in Nadin, 2007 |
| 305 | -119.388 | 37.063 | 4.3 | "Brady (Ague redo)" in Nadin, 2007 |
| 310 | -119.483 | 37.079 | 3.8 | "Brady (Ague redo)" in Nadin, 2007 |
| 108 | -118.329 | 37.133 | 3.1 | "Brady (Ague redo)" in Nadin, 2007 |
| 311 | -119.508 | 37.138 | 5   | "Brady (Ague redo)" in Nadin, 2007 |
| 293 | -119.304 | 37.146 | 5   | "Brady (Ague redo)" in Nadin, 2007 |
| 312 | -119.500 | 37.146 | 3.9 | "Brady (Ague redo)" in Nadin, 2007 |
| 295 | -119.250 | 37.150 | 3.5 | "Brady (Ague redo)" in Nadin, 2007 |
| 294 | -119.300 | 37.154 | 4.1 | "Brady (Ague redo)" in Nadin, 2007 |
| 296 | -119.204 | 37.171 | 3.5 | "Brady (Ague redo)" in Nadin, 2007 |
| 118 | -118.563 | 37.175 | 3.3 | "Brady (Ague redo)" in Nadin, 2007 |
| 120 | -118.558 | 37.192 | 3.7 | "Brady (Ague redo)" in Nadin, 2007 |
| 297 | -119.213 | 37.204 | 3.9 | "Brady (Ague redo)" in Nadin, 2007 |
| 117 | -118.617 | 37.217 | 3.3 | "Brady (Ague redo)" in Nadin, 2007 |
| 337 | -119.354 | 37.217 | 3.7 | "Brady (Ague redo)" in Nadin, 2007 |
| 338 | -119.350 | 37.221 | 3   | "Brady (Ague redo)" in Nadin, 2007 |
| 116 | -118.608 | 37.225 | 3.2 | "Brady (Ague redo)" in Nadin, 2007 |
| 298 | -119.158 | 37.238 | 4   | "Brady (Ague redo)" in Nadin, 2007 |
| 339 | -119.363 | 37.242 | 4.1 | "Brady (Ague redo)" in Nadin, 2007 |
| 340 | -119.354 | 37.248 | 3.3 | "Brady (Ague redo)" in Nadin, 2007 |
| 341 | -119.354 | 37.263 | 2.6 | "Brady (Ague redo)" in Nadin, 2007 |
| 299 | -119.104 | 37.292 | 3.5 | "Brady (Ague redo)" in Nadin, 2007 |
| 319 | -119.508 | 37.292 | 3   | "Brady (Ague redo)" in Nadin, 2007 |
| 320 | -119.508 | 37.308 | 3.5 | "Brady (Ague redo)" in Nadin, 2007 |
| 301 | -119.108 | 37.317 | 4.5 | "Brady (Ague redo)" in Nadin, 2007 |
| 300 | -119.071 | 37.321 | 3.3 | "Brady (Ague redo)" in Nadin, 2007 |
| 322 | -119.496 | 37.333 | 3.5 | "Brady (Ague redo)" in Nadin, 2007 |
| 343 | -119.367 | 37.333 | 3   | "Brady (Ague redo)" in Nadin, 2007 |
| 123 | -118.538 | 37.342 | 2.9 | "Brady (Ague redo)" in Nadin, 2007 |
| 124 | -118.533 | 37.342 | 2.9 | "Brady (Ague redo)" in Nadin, 2007 |
| 103 | -118.053 | 37.350 | 2.3 | "Brady (Ague redo)" in Nadin, 2007 |

|     |          |        |     |                                    |
|-----|----------|--------|-----|------------------------------------|
| 323 | -119.475 | 37.358 | 3.4 | "Brady (Ague redo)" in Nadin, 2007 |
| 317 | -119.642 | 37.363 | 3.9 | "Brady (Ague redo)" in Nadin, 2007 |
| 344 | -119.392 | 37.371 | 4.1 | "Brady (Ague redo)" in Nadin, 2007 |
| 316 | -119.633 | 37.392 | 2.5 | "Brady (Ague redo)" in Nadin, 2007 |
| 105 | -117.938 | 37.446 | 3.5 | "Brady (Ague redo)" in Nadin, 2007 |
| 329 | -119.458 | 37.454 | 3.6 | "Brady (Ague redo)" in Nadin, 2007 |
| 268 | -118.738 | 37.458 | 3.1 | "Brady (Ague redo)" in Nadin, 2007 |
| 330 | -119.442 | 37.471 | 2.6 | "Brady (Ague redo)" in Nadin, 2007 |
| 315 | -119.633 | 37.479 | 3.2 | "Brady (Ague redo)" in Nadin, 2007 |
| 331 | -119.429 | 37.479 | 3.2 | "Brady (Ague redo)" in Nadin, 2007 |
| 332 | -119.417 | 37.483 | 3.8 | "Brady (Ague redo)" in Nadin, 2007 |
| 269 | -118.738 | 37.504 | 3.1 | "Brady (Ague redo)" in Nadin, 2007 |
| 348 | -119.271 | 37.546 | 3   | "Brady (Ague redo)" in Nadin, 2007 |
| 271 | -118.700 | 37.550 | 4.4 | "Brady (Ague redo)" in Nadin, 2007 |
| 349 | -119.292 | 37.554 | 3.8 | "Brady (Ague redo)" in Nadin, 2007 |
| 351 | -119.292 | 37.554 | 4.3 | "Brady (Ague redo)" in Nadin, 2007 |
| 353 | -119.292 | 37.554 | 4.6 | "Brady (Ague redo)" in Nadin, 2007 |
| 99  | -118.239 | 37.559 | 2.8 | "Brady (Ague redo)" in Nadin, 2007 |
| 97  | -118.240 | 37.561 | 2.7 | "Brady (Ague redo)" in Nadin, 2007 |
| 96  | -118.241 | 37.563 | 3.4 | "Brady (Ague redo)" in Nadin, 2007 |
| 422 | -119.100 | 37.600 | 3.3 | "Brady (Ague redo)" in Nadin, 2007 |
| 67  | -119.771 | 37.758 | 4.3 | "Brady (Ague redo)" in Nadin, 2007 |
| 68  | -119.875 | 37.763 | 3.1 | "Brady (Ague redo)" in Nadin, 2007 |
| 142 | -118.475 | 37.767 | 3.1 | "Brady (Ague redo)" in Nadin, 2007 |
| 63  | -119.550 | 37.800 | 3.8 | "Brady (Ague redo)" in Nadin, 2007 |
| 62  | -119.475 | 37.817 | 1.1 | "Brady (Ague redo)" in Nadin, 2007 |
| 66  | -119.708 | 37.817 | 3.8 | "Brady (Ague redo)" in Nadin, 2007 |
| 61  | -119.467 | 37.825 | 2.6 | "Brady (Ague redo)" in Nadin, 2007 |
| 64  | -119.583 | 37.825 | 3.1 | "Brady (Ague redo)" in Nadin, 2007 |
| 65  | -119.588 | 37.833 | 2.5 | "Brady (Ague redo)" in Nadin, 2007 |
| 69  | -120.000 | 37.833 | 1.3 | "Brady (Ague redo)" in Nadin, 2007 |
| 60  | -119.388 | 37.850 | 1.1 | "Brady (Ague redo)" in Nadin, 2007 |
| 59  | -119.367 | 37.875 | 2.9 | "Brady (Ague redo)" in Nadin, 2007 |
| 145 | -118.633 | 37.875 | 4.6 | "Brady (Ague redo)" in Nadin, 2007 |
| 147 | -118.825 | 37.892 | 4.8 | "Brady (Ague redo)" in Nadin, 2007 |
| 149 | -118.871 | 37.900 | 3   | "Brady (Ague redo)" in Nadin, 2007 |
| 56  | -119.163 | 37.933 | 1.4 | "Brady (Ague redo)" in Nadin, 2007 |
| 267 | -119.258 | 38.029 | 4   | "Brady (Ague redo)" in Nadin, 2007 |
| 151 | -119.186 | 38.042 | 1.8 | "Brady (Ague redo)" in Nadin, 2007 |
| 262 | -120.004 | 38.204 | 3.8 | "Brady (Ague redo)" in Nadin, 2007 |
| 263 | -119.333 | 38.217 | 0.6 | "Brady (Ague redo)" in Nadin, 2007 |
| 261 | -119.950 | 38.300 | 4.9 | "Brady (Ague redo)" in Nadin, 2007 |

|        |          |        |     |                                    |
|--------|----------|--------|-----|------------------------------------|
| 254    | -119.583 | 38.313 | 2.8 | "Brady (Ague redo)" in Nadin, 2007 |
| 255    | -119.600 | 38.317 | 1.6 | "Brady (Ague redo)" in Nadin, 2007 |
| 253    | -119.558 | 38.325 | 2.6 | "Brady (Ague redo)" in Nadin, 2007 |
| 256    | -119.679 | 38.329 | 0.9 | "Brady (Ague redo)" in Nadin, 2007 |
| 257    | -119.753 | 38.329 | 2.6 | "Brady (Ague redo)" in Nadin, 2007 |
| 258    | -119.771 | 38.338 | 2.7 | "Brady (Ague redo)" in Nadin, 2007 |
| 259    | -119.825 | 38.346 | 2.7 | "Brady (Ague redo)" in Nadin, 2007 |
| 260    | -119.892 | 38.354 | 2.7 | "Brady (Ague redo)" in Nadin, 2007 |
| 90     | -119.483 | 38.517 | 0.6 | "Brady (Ague redo)" in Nadin, 2007 |
| 89     | -119.538 | 38.646 | 2.7 | "Brady (Ague redo)" in Nadin, 2007 |
| 73     | -120.550 | 38.763 | 4.2 | "Brady (Ague redo)" in Nadin, 2007 |
| 74     | -120.546 | 38.764 | 4.2 | "Brady (Ague redo)" in Nadin, 2007 |
| 76     | -120.433 | 38.767 | 3.3 | "Brady (Ague redo)" in Nadin, 2007 |
| 77     | -120.433 | 38.767 | 3.1 | "Brady (Ague redo)" in Nadin, 2007 |
| 79     | -120.375 | 38.771 | 4.2 | "Brady (Ague redo)" in Nadin, 2007 |
| 78     | -120.413 | 38.775 | 1.7 | "Brady (Ague redo)" in Nadin, 2007 |
| 80     | -120.292 | 38.779 | 3.1 | "Brady (Ague redo)" in Nadin, 2007 |
| 85     | -119.917 | 38.779 | 2.4 | "Brady (Ague redo)" in Nadin, 2007 |
| 81     | -120.167 | 38.783 | 2.4 | "Brady (Ague redo)" in Nadin, 2007 |
| 84     | -119.992 | 38.800 | 2.4 | "Brady (Ague redo)" in Nadin, 2007 |
| 82     | -120.121 | 38.813 | 2.4 | "Brady (Ague redo)" in Nadin, 2007 |
| 83     | -120.033 | 38.817 | 3.5 | "Brady (Ague redo)" in Nadin, 2007 |
| 128    | -120.317 | 39.321 | 1.3 | "Brady (Ague redo)" in Nadin, 2007 |
| 130    | -120.600 | 39.325 | 1.5 | "Brady (Ague redo)" in Nadin, 2007 |
| 129    | -120.392 | 39.329 | 0.8 | "Brady (Ague redo)" in Nadin, 2007 |
| 133    | -121.079 | 39.400 | 3.9 | "Brady (Ague redo)" in Nadin, 2007 |
| 132    | -120.985 | 39.517 | 2.8 | "Brady (Ague redo)" in Nadin, 2007 |
| 22*    | -118.327 | 35.673 | 5.3 | Dixon, 1995                        |
| 29*    | -118.489 | 35.306 | 3.5 | Dixon, 1995                        |
| 36.5*  | -118.529 | 35.232 | 4.8 | Dixon, 1995                        |
| 45*    | -118.583 | 35.304 | 4   | Dixon, 1995                        |
| 49*    | -118.438 | 35.042 | 5.1 | Dixon, 1995                        |
| 51*    | -118.475 | 35.303 | 5.1 | Dixon, 1995                        |
| 52*    | -118.409 | 35.428 | 4.8 | Dixon, 1995                        |
| 58*    | -118.481 | 35.070 | 7.2 | Dixon, 1995                        |
| Th275* | -118.457 | 35.075 | 6.5 | Dixon, 1995                        |
| 18*    | -118.352 | 35.610 | 5.7 | Dixon, 1995                        |
| 49*    | -118.361 | 35.331 | 6   | Dixon, 1995                        |
| 45*    | -118.583 | 35.304 | 4.3 | Dixon, 1995                        |
| 04SS34 | -118.217 | 35.477 | 6.1 | Nadin, 2007                        |
| 04SS37 | -118.277 | 35.456 | 5.7 | Nadin, 2007                        |
| 04SS39 | -118.361 | 35.453 | 5   | Nadin, 2007                        |

|             |          |        |      |                              |
|-------------|----------|--------|------|------------------------------|
| 04SS42      | -118.419 | 35.424 | 5    | Nadin, 2007                  |
| 03SS1       | -118.081 | 35.740 | 4.1  | Nadin, 2007                  |
| 02SS16      | -118.337 | 35.681 | 4.1  | Nadin, 2007                  |
| 02SS13      | -118.327 | 35.673 | 4.5  | Nadin, 2007                  |
| 03SS5       | -118.464 | 35.676 | 4.6  | Nadin, 2007                  |
| 03SS27      | -118.585 | 35.750 | 2.2  | Nadin, 2007                  |
| 04SS43      | -118.414 | 35.405 | 5.5  | Nadin, 2007                  |
| 04SS45      | -118.445 | 35.304 | 5.1  | Nadin, 2007                  |
| 04SS44      | -118.584 | 35.304 | 3.8  | Nadin, 2007                  |
| 04SS31      | -118.142 | 35.558 | 4.2  | Nadin, 2007                  |
| 04SS27      | -118.644 | 35.223 | 3.7  | Nadin, 2007                  |
| 04SS28      | -118.658 | 35.209 | 4.6  | Nadin, 2007                  |
| BM149       | -118.554 | 35.362 | 3.2  | Pickett & Saleeby, 1993      |
| CM13b       | -118.553 | 35.210 | 6.9  | Pickett & Saleeby, 1993      |
| WR27a       | -118.673 | 34.947 | 8    | Pickett & Saleeby, 1993      |
| TC-12a      | -118.754 | 35.002 | 7.8  | Pickett & Saleeby, 1993      |
| GC-16       | -118.647 | 35.014 | 8.3  | Pickett & Saleeby, 1993      |
| CM657       | -118.748 | 35.008 | 8.8  | Pickett & Saleeby, 1993      |
| GC-33       | -118.826 | 34.920 | 9.3  | Pickett & Saleeby, 1993      |
| 04SE1a      | -119.072 | 34.883 | 8.3  | Chapman et al., 2011         |
| 08SE270     | -119.087 | 34.875 | 8.4  | Chapman et al., 2011         |
| 08SE202     | -118.945 | 34.896 | 7.1  | Chapman et al., 2011         |
| No name     | -118.883 | 34.889 | 7.5  | Chapman et al., 2011         |
| 04SE5       | -119.064 | 34.852 | 3.1  | this study                   |
| 08SE463     | -119.102 | 34.872 | 5.7  | this study                   |
| 08SE429     | -119.129 | 34.865 | 5.8  | this study                   |
| K16b-87     | -121.526 | 36.803 | 5.2  | this study                   |
| 08SE674     | -118.920 | 34.885 | 10.7 | this study                   |
| 08SE451     | -119.111 | 34.874 | 10.2 | this study                   |
| 08TC27a     | -118.446 | 34.971 | 2.8  | this study                   |
| 08TC29      | -118.458 | 34.969 | 2.4  | this study                   |
| 10SE1       | -119.222 | 34.884 | 4    | this study                   |
| 94KK27      | -118.605 | 36.226 | 4.2  | this study                   |
| 10SE41      | -118.943 | 34.869 | 3.7  | this study                   |
| 31001-5     | -121.647 | 36.277 | 3.4  | this study                   |
| 91TH181     | -118.411 | 35.053 | 4.4  | this study                   |
| 93TH417     | -118.440 | 35.040 | 3.8  | this study                   |
| Coast Ridge | -121.479 | 36.023 | 7.5  | Kidder et al., 2003          |
| No name*    | -122.050 | 37.000 | 5    | DeCristoforo & Cameron, 1977 |
| 78-DJ-22*   | -121.516 | 36.747 | 3.6  | John, 1981                   |
| 78-DJ-24*   | -121.519 | 36.747 | 3    | John, 1981                   |
| 78-DJ-26*   | -121.517 | 36.751 | 4.4  | John, 1981                   |

|         |          |        |     |            |
|---------|----------|--------|-----|------------|
| FM-16*  | -121.488 | 36.764 | 3.8 | John, 1981 |
| FM-130* | -121.474 | 36.761 | 2.7 | John, 1981 |

\* Location approximate

§ These data are an extension of an earlier compilation by Nadin (2007).
