# Supplementary material
Source: publisher figshare collection journal article supplement (https://gsapubs.figshare.com/ndownloader/files/22398732)
Supplement: Supplementary file 1 [file 22398732 › SD_T7.pdf]

**Table SD7.** Detailed (U-Th)/He replicates data.

|                      | Concentrations |          |             | Grain dimensions |             | Ages (Ma)                          |         |                       |
|----------------------|----------------|----------|-------------|------------------|-------------|------------------------------------|---------|-----------------------|
| Sample replicate     | U (ppm)        | Th (ppm) | He (nmol/g) | Radius (μm)      | Length (μm) | F <sub>T</sub> factor <sup>§</sup> | Raw age | Corr age <sup>†</sup> |
| <i>Sample 04SS27</i> |                |          |             |                  |             |                                    |         |                       |
| 04SS27-4:fai         | 671            | 238      | 257.9       | 68.28            | 399.92      | 0.86                               | 64.9    | 75.8                  |
| 04SS27-3:fai         | 489            | 127      | 147.9       | 56.325           | 294.95      | 0.82                               | 52.2    | 63.2                  |
| 04SS27-2:las         | 407            | 114      | 160.2       | 82.035           | 313.94      | 0.87                               | 67.5    | 77.5                  |
| 04SS27-5:las         | 149            | 20       | 89.6        | 53.36            | 303.69      | 0.82                               | 106.3   | 129.6                 |
| <i>Sample 04SS28</i> |                |          |             |                  |             |                                    |         |                       |
| 04SS28-1:las         | 431            | 121      | 168.9       | 64.74            | 292.89      | 0.84                               | 67.2    | 79.8                  |
| 04SS28-3:las         | 379            | 102      | 141.9       | 78.815           | 335.74      | 0.87                               | 64.4    | 74.1                  |
| 04SS28-2:fai         | 365            | 131      | 150.0       | 72.27            | 305.22      | 0.86                               | 69.3    | 80.9                  |
| 04SS28-5:las         | 337            | 114      | 170.5       | 71.505           | 359.78      | 0.86                               | 85.4    | 99.3                  |
| <i>Sample 04SS30</i> |                |          |             |                  |             |                                    |         |                       |
| 04SS30-2:las         | 489            | 218      | 146.5       | 43.5             | 194.2       | 0.77                               | 49.6    | 64.5                  |
| 04SS30-4:las         | 288            | 96       | 86.3        | 36.45            | 150.6       | 0.72                               | 50.8    | 69.9                  |
| 04SS30-3:las         | 943            | 296      | 294.3       | 34.99            | 116.58      | 0.70                               | 53.2    | 75.5                  |
| <i>Sample 04SS32</i> |                |          |             |                  |             |                                    |         |                       |
| 04SS32-1:las         | 22             | 6        | 6.9         | 55.835           | 284.51      | 0.82                               | 54.8    | 66.6                  |
| 04SS32-2:las         | 191            | 26       | 79.5        | 46.265           | 250.78      | 0.79                               | 73.5    | 92.9                  |
| 04SS32-4:las         | 218            | 85       | 83.9        | 39.175           | 233.75      | 0.76                               | 64.5    | 85.0                  |
| 04SS32-6:las         | 194            | 57       | 58.2        | 45.72            | 291.82      | 0.79                               | 51.4    | 64.8                  |
| <i>Sample 04SS33</i> |                |          |             |                  |             |                                    |         |                       |
| 04SS33-1:las         | 363            | 193      | 132.2       | 39.5             | 233.7       | 0.76                               | 59.1    | 78.0                  |
| 04SS33-2:las         | 240            | 90       | 83.4        | 50               | 202.2       | 0.79                               | 58.3    | 73.4                  |
| 04SS33-3:las         | 326            | 131      | 128.0       | 49.75            | 262.5       | 0.80                               | 65.7    | 81.9                  |
| 04SS33-4:las         | 250            | 104      | 85.2        | 41.3             | 245.2       | 0.77                               | 56.8    | 73.8                  |
| <i>Sample 04SS35</i> |                |          |             |                  |             |                                    |         |                       |
| 04SS35-1:las         | 355            | 98       | 128.3       | 47.885           | 286.03      | 0.80                               | 62.1    | 77.6                  |
| 04SS35-3:las         | 113            | 29       | 39.0        | 66.95            | 330.75      | 0.85                               | 59.7    | 70.2                  |
| 04SS35-5:las         | 319            | 92       | 133.7       | 59.01            | 291.12      | 0.83                               | 71.7    | 86.3                  |
| 04SS35-6:fai         | 283            | 88       | 143.2       | 51.185           | 256.62      | 0.81                               | 86.0    | 106.5                 |
| 04SS35-7:las         | 228            | 74       | 113.7       | 75.88            | 360.24      | 0.86                               | 84.7    | 97.8                  |
| 04SS35-8:las         | 454            | 140      | 155.3       | 60.34            | 355.83      | 0.84                               | 58.4    | 69.6                  |
| <i>Sample 04SS36</i> |                |          |             |                  |             |                                    |         |                       |
| 04SS36-3:las         | 373            | 97       | 110.8       | 52.5             | 234.9       | 0.81                               | 51.3    | 63.4                  |
| 04SS36-4:las         | 370            | 90       | 123.5       | 48.8             | 216.4       | 0.79                               | 57.7    | 72.6                  |
| 04SS36-1:las         | 585            | 99       | 173.6       | 38.13            | 240.31      | 0.75                               | 52.3    | 69.3                  |
| 04SS36-2:las         | 401            | 77       | 129.6       | 48.475           | 204.24      | 0.79                               | 56.6    | 71.5                  |
| <i>Sample 04SS38</i> |                |          |             |                  |             |                                    |         |                       |
| 04SS38-1:las         | 269            | 59       | 80.1        | 58.35            | 337.6       | 0.83                               | 51.8    | 62.2                  |
| 04SS38-7:las         | 196            | 42       | 83.1        | 47.54            | 268.83      | 0.80                               | 73.9    | 92.6                  |
| 04SS38-5:las         | 473            | 96       | 249.5       | 36.185           | 242.86      | 0.74                               | 91.8    | 123.1                 |
| 04SS38-6:las         | 367            | 111      | 157.1       | 49.495           | 212.11      | 0.79                               | 73.0    | 91.8                  |
| 04SS38-9:las         | 355            | 64       | 112.1       | 61.515           | 286.25      | 0.84                               | 55.4    | 66.3                  |
| <i>Sample 04SS39</i> |                |          |             |                  |             |                                    |         |                       |
| 04SS39-4:las         | 636            | 226      | 227.7       | 49.75            | 320.9       | 0.81                               | 60.4    | 74.8                  |
| 04SS39-2:las         | 520            | 126      | 135.5       | 34.65            | 164         | 0.72                               | 45.2    | 62.7                  |
| 04SS39-5:las         | 275            | 65       | 96.6        | 60.005           | 311.81      | 0.83                               | 60.8    | 72.8                  |
| 04SS39-6:las         | 208            | 61       | 85.3        | 57.885           | 282.41      | 0.83                               | 70.1    | 84.7                  |
| <i>Sample 04SS40</i> |                |          |             |                  |             |                                    |         |                       |
| 04SS40-2:las         | 155            | 28       | 66.2        | 57.35            | 273.9       | 0.82                               | 74.9    | 90.6                  |
| 04SS40-3:las         | 108            | 33       | 33.8        | 72.27            | 305.22      | 0.86                               | 53.3    | 62.2                  |

**Table SD7 (Continued).** Detailed (U-Th)/He replicates data.

| Sample replicate     | Concentrations |          |             | Grain dimensions         |                          | $F_T$ factor <sup>§</sup> | Ages (Ma) |                       |
|----------------------|----------------|----------|-------------|--------------------------|--------------------------|---------------------------|-----------|-----------------------|
|                      | U (ppm)        | Th (ppm) | He (nmol/g) | Radius ( $\mu\text{m}$ ) | Length ( $\mu\text{m}$ ) |                           | Raw age   | Corr age <sup>†</sup> |
| 04SS40-5:las         | 179            | 60       | 70.6        | 58.69                    | 324.55                   | 0.83                      | 66.8      | 80.2                  |
| 04SS40-6:las         | 158            | 43       | 54.3        | 49.055                   | 270.34                   | 0.80                      | 59.2      | 73.8                  |
| <i>Sample 04SS41</i> |                |          |             |                          |                          |                           |           |                       |
| 04SS41-3:las         | 657            | 140      | 215.8       | 51.755                   | 272.06                   | 0.81                      | 57.2      | 70.6                  |
| 04SS41-4:las         | 359            | 65       | 129.9       | 47.885                   | 286.03                   | 0.80                      | 63.4      | 79.2                  |
| 04SS41-2:las         | 379            | 81       | 134.3       | 30.45                    | 154.69                   | 0.69                      | 61.7      | 89.4                  |
| 04SS41-1:las         | 453            | 73       | 194.8       | 56.315                   | 237.88                   | 0.82                      | 75.6      | 92.3                  |
| 04SS41-5:las         | 185            | 52       | 79.3        | 64.74                    | 247.59                   | 0.84                      | 73.6      | 87.7                  |
| <i>Sample 04SS43</i> |                |          |             |                          |                          |                           |           |                       |
| 04SS43-1:las         | 115            | 37       | 47.2        | 66.97                    | 327.48                   | 0.85                      | 69.8      | 82.2                  |
| 04SS43-5:las         | 332            | 114      | 130.3       | 53.635                   | 299.74                   | 0.82                      | 66.4      | 81.1                  |
| 04SS43-6:las         | 50             | 22       | 24.4        | 47.755                   | 298.98                   | 0.80                      | 80.3      | 100.3                 |
| 04SS43-7:las         | 58             | 14       | 32.0        | 84.5                     | 289.86                   | 0.87                      | 95.2      | 109.1                 |
| 04SS43-8:las         | 183            | 35       | 46.0        | 54.135                   | 258.94                   | 0.81                      | 44.2      | 54.2                  |
| 04SS43-9:las         | 310            | 53       | 78.7        | 47.49                    | 259.82                   | 0.80                      | 44.8      | 56.2                  |
| 04SS43-11:la         | 94             | 29       | 36.8        | 45.665                   | 297.53                   | 0.79                      | 66.9      | 84.3                  |
| <i>Sample 04SS44</i> |                |          |             |                          |                          |                           |           |                       |
| 04SS44-1:las         | 441            | 116      | 168.2       | 71.65                    | 340.9                    | 0.86                      | 65.7      | 76.5                  |
| 04SS44-3:las         | 420            | 109      | 133.4       | 66.95                    | 252.8                    | 0.84                      | 54.8      | 65.1                  |
| 04SS44-5:las         | 518            | 152      | 238.7       | 57.145                   | 317.4                    | 0.83                      | 78.7      | 95.0                  |
| 04SS44-7:las         | 347            | 104      | 149.5       | 96.88                    | 426.14                   | 0.89                      | 73.6      | 82.4                  |
| 04SS44-4:las         | 270            | 84       | 183.0       | 51.005                   | 224.05                   | 0.80                      | 114.9     | 143.0                 |
| <i>Sample 04SS45</i> |                |          |             |                          |                          |                           |           |                       |
| 04SS45-2:las         | 233            | 87       | 33.4        | 67.55                    | 322.5                    | 0.85                      | 24.2      | 28.4                  |
| 04SS45-3:las         | 193            | 77       | 23.6        | 75.05                    | 355.8                    | 0.86                      | 20.6      | 23.8                  |
| 04SS45-1:las         | 246            | 80       | 26.0        | 35.215                   | 207.48                   | 0.73                      | 18.1      | 24.7                  |
| 04SS45-5:las         | 402            | 115      | 44.8        | 53.645                   | 335.3                    | 0.82                      | 19.2      | 23.3                  |

§  $\alpha$ -ejection correction factor as described by Farley (2002). Measured age must be divided to by this factor to obtain the  $\alpha$ -ejection-corrected age.

†  $\alpha$ -ejection-corrected age.
