# Supplementary material
Source: publisher figshare collection journal article supplement (https://gsapubs.figshare.com/ndownloader/files/22398732)
Supplement: Supplementary file 1 [file 22398732 › SD_T8.pdf]

**Table SD8.** Representative mineral analyses used in thermobarometric calculations.<sup>s</sup>

| Sample                         | <i>31001-5</i> | <i>08TC29</i> | <i>10SE41</i> |  | <i>31001-5</i> | <i>08TC29</i> | <i>10SE41</i> |
|--------------------------------|----------------|---------------|---------------|--|----------------|---------------|---------------|
| Mineral                        | grt            | grt           | grt           |  | bt             | bt            | bt            |
| SiO <sub>2</sub>               | 37.71          | 37.56         | 37.36         |  | 35.12          | 34.86         | 34.34         |
| TiO <sub>2</sub>               | 0.04           | 0.00          | 0.02          |  | 3.57           | 2.36          | 2.73          |
| Al <sub>2</sub> O <sub>3</sub> | 20.74          | 20.50         | 20.66         |  | 18.52          | 19.96         | 19.25         |
| Cr <sub>2</sub> O <sub>3</sub> | 0.06           | 0.00          | 0.02          |  | 0.00           | 0.02          | 0.00          |
| Fe <sub>2</sub> O <sub>3</sub> | 0.12           | 0.00          | 0.42          |  | 0.00           | 0.00          | 0.00          |
| FeO                            | 31.60          | 33.76         | 35.81         |  | 18.61          | 22.24         | 22.31         |
| MnO                            | 2.87           | 6.56          | 2.71          |  | 0.11           | 0.14          | 0.08          |
| MgO                            | 4.84           | 1.58          | 2.66          |  | 9.04           | 6.57          | 6.90          |
| CaO                            | 1.52           | 1.26          | 1.05          |  | 0.01           | 0.06          | 0.01          |
| Na <sub>2</sub> O              | 0.00           | 0.00          | 0.01          |  | 0.24           | 0.20          | 0.25          |
| K <sub>2</sub> O               | 0.00           | 0.00          | 0.00          |  | 8.98           | 8.56          | 8.84          |
| Total                          | 99.49          | 101.22        | 100.71        |  | 94.20          | 94.97         | 94.71         |

  

|                  | O units |      |      |                  | 8 cations |      |      |
|------------------|---------|------|------|------------------|-----------|------|------|
| Si               | 3.02    | 3.03 | 3.01 | Si               | 2.79      | 2.79 | 2.75 |
|                  |         |      |      | Al <sup>iv</sup> | 1.21      | 1.21 | 1.25 |
| Al               | 1.96    | 1.95 | 1.96 | ΣT               | 4.00      | 4.00 | 4.00 |
| Fe <sup>3+</sup> | 0.01    | 0.00 | 0.03 |                  |           |      |      |
| ΣM2              | 1.96    | 1.95 | 1.99 | Al <sup>vi</sup> | 0.52      | 0.67 | 0.57 |
|                  |         |      |      | Ti               | 0.21      | 0.14 | 0.16 |
| Fe <sup>2+</sup> | 2.12    | 2.28 | 2.41 | Mg               | 1.07      | 0.78 | 0.82 |
| Mn               | 0.19    | 0.45 | 0.18 | Fe <sup>3+</sup> | 0.00      | 0.00 | 0.00 |
| Mg               | 0.58    | 0.19 | 0.32 | Fe <sup>2+</sup> | 1.24      | 1.49 | 1.49 |
| Ca               | 0.13    | 0.11 | 0.09 | Mn               | 0.01      | 0.01 | 0.01 |
| ΣM1              | 3.02    | 3.02 | 3.01 | Ca               | 0.00      | 0.01 | 0.00 |
|                  |         |      |      | ΣM               | 3.05      | 3.10 | 3.06 |
| Total            | 8.00    | 8.00 | 8.00 |                  |           |      |      |
|                  |         |      |      | Na               | 0.04      | 0.03 | 0.04 |
| X <sub>alm</sub> | 0.70    | 0.75 | 0.80 | K                | 0.91      | 0.87 | 0.90 |
| X <sub>grs</sub> | 0.04    | 0.04 | 0.03 | ΣA               | 0.95      | 0.90 | 0.94 |
| X <sub>prp</sub> | 0.19    | 0.06 | 0.11 |                  |           |      |      |
| X <sub>sps</sub> | 0.06    | 0.15 | 0.06 | Total            | 8.00      | 8.00 | 8.00 |

**Table SD8 (Continued).** Representative mineral analyses used in thermobarometric calculations.<sup>§</sup>

| Sample                         | <i>31001-5</i> | <i>08TC29</i> | <i>10SE41</i> | <i>31001-5</i> | <i>08TC29</i> |
|--------------------------------|----------------|---------------|---------------|----------------|---------------|
| Mineral                        | plag           | plag          | plag          | crd            | crd           |
| SiO <sub>2</sub>               | 60.46          | 60.23         | 60.11         | 48.53          | 48.48         |
| TiO <sub>2</sub>               | 0.00           | 0.00          | 0.00          | 0.01           | 0.04          |
| Al <sub>2</sub> O <sub>3</sub> | 24.55          | 25.36         | 24.81         | 32.29          | 33.13         |
| Cr <sub>2</sub> O <sub>3</sub> | 0.00           | 0.00          | 0.00          | 0.00           | 0.00          |
| Fe <sub>2</sub> O <sub>3</sub> | 0.17           | 0.00          | 0.34          | 0.51           | 0.00          |
| FeO                            | 0.00           | 0.00          | 0.00          | 7.61           | 10.67         |
| MnO                            | 0.00           | 0.00          | 0.00          | 0.33           | 0.52          |
| MgO                            | 0.00           | 0.00          | 0.00          | 8.05           | 6.24          |
| CaO                            | 5.78           | 6.86          | 6.56          | 0.02           | 0.02          |
| Na <sub>2</sub> O              | 8.09           | 7.93          | 8.07          | 0.24           | 0.18          |
| K <sub>2</sub> O               | 0.16           | 0.05          | 0.11          | 0.00           | 0.00          |
| Total                          | 99.21          | 100.43        | 100.00        | 97.59          | 99.28         |

|                  | O units |      |      |                  | O units |      |
|------------------|---------|------|------|------------------|---------|------|
| Si               | 2.71    | 2.67 | 2.69 | Si               | 5.01    | 5.00 |
| Al               | 1.30    | 1.33 | 1.31 | Al <sup>iv</sup> | 0.99    | 1.00 |
| Fe <sup>3+</sup> | 0.01    | 0.00 | 0.01 | ΣT               | 6.00    | 6.00 |
| ΣT               | 4.01    | 4.00 | 4.00 |                  |         |      |
|                  |         |      |      | Al <sup>vi</sup> | 2.95    | 3.03 |
| Ca               | 0.28    | 0.33 | 0.31 | Fe <sup>3+</sup> | 0.04    | 0.00 |
| Na               | 0.70    | 0.68 | 0.70 | ΣM2              | 2.99    | 3.03 |
| K                | 0.01    | 0.00 | 0.01 |                  |         |      |
| ΣM               | 0.99    | 1.01 | 1.02 | Fe <sup>2+</sup> | 0.66    | 0.92 |
|                  |         |      |      | Mn               | 0.03    | 0.05 |
| Total            | 5.00    | 5.01 | 5.02 | Mg               | 1.24    | 0.96 |
|                  |         |      |      | ΣM1              | 1.93    | 1.93 |
| X <sub>an</sub>  | 0.28    | 0.32 | 0.31 |                  |         |      |
| X <sub>ab</sub>  | 0.72    | 0.68 | 0.69 | Total            | 9.93    | 9.96 |

§ Garnet normalized to 12O, biotite normalized to eight cations, plagioclase normalized to 8O, cordierite normalized to 18O. Ferric iron calculated using the program AX (Holland and Powell, 1998). Mineral abbreviations: ab, albite; an, anorthite; alm, almandine; bt, biotite; crd, cordierite; grs, grossular; grt, garnet; plag, plagioclase; prp, pyrope; sps, spessartine.
