# Supplementary material
Source: publisher figshare collection journal article supplement (https://gsapubs.figshare.com/ndownloader/files/22398732)
Supplement: Supplementary file 1 [file 22398732 › SD_T9.pdf]

**Table SD9.** Representative hornblende analyses used in aluminum-in-hornblende pressure calculations.

| Sample                           | <i>K16b-87</i>             | <i>91TH181</i>          | <i>93TH417</i>          | <i>94KK27</i>                   | <i>04SE5</i>       | <i>08SE429</i>            |
|----------------------------------|----------------------------|-------------------------|-------------------------|---------------------------------|--------------------|---------------------------|
| Unit                             | South tonalite of Vergeles | Claraville granodiorite | Claraville granodiorite | Granodiorite of Jacobsen Meadow | Lebec granodiorite | Unnamed tonalite          |
| SiO <sub>2</sub>                 | 44.08                      | 43.01                   | 44.83                   | 44.55                           | 46.54              | 43.45                     |
| TiO <sub>2</sub>                 | 1.55                       | 1.59                    | 1.44                    | 1.26                            | 0.35               | 1.04                      |
| Al <sub>2</sub> O <sub>3</sub>   | 9.77                       | 8.55                    | 8.03                    | 8.55                            | 7.23               | 10.36                     |
| Fe <sub>2</sub> O <sub>3</sub> * | 3.43                       | 4.75                    | 3.07                    | 4.22                            | 2.38               | 2.31                      |
| FeO                              | 16.99                      | 19.64                   | 19.03                   | 13.44                           | 17.68              | 16.48                     |
| MnO                              | 0.50                       | 0.68                    | 0.44                    | 0.47                            | 0.57               | 0.42                      |
| MgO                              | 8.36                       | 6.54                    | 7.85                    | 10.79                           | 9.10               | 8.90                      |
| CaO                              | 11.52                      | 11.21                   | 11.62                   | 11.83                           | 11.94              | 11.87                     |
| Na <sub>2</sub> O                | 1.21                       | 1.42                    | 1.08                    | 1.13                            | 0.91               | 1.12                      |
| K <sub>2</sub> O                 | 1.06                       | 1.06                    | 0.95                    | 0.98                            | 0.73               | 1.29                      |
| Total                            | 98.48                      | 98.45                   | 98.33                   | 97.22                           | 97.43              | 97.24                     |
| Si                               | 6.63                       | 6.61                    | 6.80                    | 6.70                            | 7.04               | 6.60                      |
| Al <sup>iv</sup>                 | 1.37                       | 1.39                    | 1.20                    | 1.30                            | 0.96               | 1.40                      |
| ΣT                               | 8.00                       | 8.00                    | 8.00                    | 8.00                            | 8.00               | 8.00                      |
| Al <sup>vi</sup>                 | 0.36                       | 0.16                    | 0.24                    | 0.21                            | 0.33               | 0.45                      |
| Ti                               | 0.18                       | 0.18                    | 0.16                    | 0.14                            | 0.04               | 0.12                      |
| Fe <sup>3+</sup>                 | 0.39                       | 0.55                    | 0.35                    | 0.48                            | 0.27               | 0.26                      |
| Fe <sup>2+</sup>                 | 2.14                       | 2.52                    | 2.41                    | 1.69                            | 2.24               | 2.09                      |
| Mn                               | 0.06                       | 0.09                    | 0.06                    | 0.06                            | 0.07               | 0.05                      |
| Mg                               | 1.87                       | 1.50                    | 1.78                    | 2.42                            | 2.05               | 2.02                      |
| ΣM1-M3                           | 5.00                       | 5.00                    | 5.00                    | 5.00                            | 5.00               | 5.00                      |
| Ca                               | 1.86                       | 1.84                    | 1.89                    | 1.91                            | 1.94               | 1.93                      |
| Na                               | 0.35                       | 0.42                    | 0.32                    | 0.33                            | 0.27               | 0.33                      |
| Na <sup>M4</sup>                 | 0.14                       | 0.16                    | 0.11                    | 0.09                            | 0.06               | 0.07                      |
| ΣM4                              | 2.00                       | 2.00                    | 2.00                    | 2.00                            | 2.00               | 2.00                      |
| Na <sup>A</sup>                  | 0.21                       | 0.27                    | 0.21                    | 0.23                            | 0.20               | 0.26                      |
| K                                | 0.20                       | 0.21                    | 0.18                    | 0.19                            | 0.14               | 0.25                      |
| ΣA                               | 0.41                       | 0.47                    | 0.39                    | 0.42                            | 0.34               | 0.51                      |
| Total                            | 15.41                      | 15.47                   | 15.39                   | 15.42                           | 15.34              | 15.51                     |
| Amphibole name*                  | ferro-hornblende           | ferro-hornblende        | ferro-hornblende        | magnesian-hornblende            | ferro-hornblende   | ferro-edenitic hornblende |

**Table SD9 (Continued).**

| Sample                           | 08SE451                | 08SE463                             | 08SE674                  | 08TC27a                              | 10SE1                     |
|----------------------------------|------------------------|-------------------------------------|--------------------------|--------------------------------------|---------------------------|
| Unit                             | Antimony Peak tonalite | Unnamed tonalite                    | White Oak diorite gneiss | Granodiorite of Gamble Spring Canyon | Granite of Brush Mountain |
| SiO <sub>2</sub>                 | 42.69                  | 42.99                               | 42.45                    | 47.43                                | 47.57                     |
| TiO <sub>2</sub>                 | 0.31                   | 1.33                                | 0.20                     | 0.45                                 | 1.10                      |
| Al <sub>2</sub> O <sub>3</sub>   | 16.13                  | 10.17                               | 16.69                    | 6.94                                 | 8.59                      |
| Fe <sub>2</sub> O <sub>3</sub> * | 7.18                   | 2.76                                | 5.78                     | 3.32                                 | 6.37                      |
| FeO                              | 8.58                   | 16.91                               | 10.41                    | 15.80                                | 8.20                      |
| MnO                              | 0.49                   | 0.41                                | 0.29                     | 0.51                                 | 0.23                      |
| MgO                              | 9.64                   | 8.67                                | 8.69                     | 10.26                                | 13.02                     |
| CaO                              | 10.79                  | 11.90                               | 10.89                    | 11.83                                | 11.17                     |
| Na <sub>2</sub> O                | 1.89                   | 1.14                                | 1.68                     | 1.08                                 | 1.03                      |
| K <sub>2</sub> O                 | 0.25                   | 1.35                                | 0.30                     | 0.61                                 | 0.37                      |
| Total                            | 97.95                  | 97.10                               | 97.10                    | 97.10                                | 97.10                     |
| Si                               | 6.21                   | 6.54                                | 6.23                     | 7.06                                 | 6.89                      |
| Al <sup>iv</sup>                 | 1.79                   | 1.46                                | 1.77                     | 0.94                                 | 1.11                      |
| ΣT                               | 8.00                   | 8.00                                | 8.00                     | 8.00                                 | 8.00                      |
| Al <sup>vi</sup>                 | 0.98                   | 0.36                                | 1.12                     | 0.27                                 | 0.35                      |
| Ti                               | 0.03                   | 0.15                                | 0.02                     | 0.05                                 | 0.12                      |
| Fe <sup>3+</sup>                 | 0.79                   | 0.32                                | 0.64                     | 0.37                                 | 0.69                      |
| Fe <sup>2+</sup>                 | 1.04                   | 2.15                                | 1.28                     | 1.97                                 | 0.99                      |
| Mn                               | 0.06                   | 0.05                                | 0.04                     | 0.06                                 | 0.03                      |
| Mg                               | 2.09                   | 1.97                                | 1.90                     | 2.28                                 | 2.81                      |
| ΣM1-M3                           | 5.00                   | 5.00                                | 5.00                     | 5.00                                 | 5.00                      |
| Ca                               | 1.68                   | 1.94                                | 1.71                     | 1.89                                 | 1.73                      |
| Na                               | 0.53                   | 0.34                                | 0.48                     | 0.31                                 | 0.29                      |
| Na <sup>M4</sup>                 | 0.32                   | 0.06                                | 0.29                     | 0.11                                 | 0.27                      |
| ΣM4                              | 2.00                   | 2.00                                | 2.00                     | 2.00                                 | 2.00                      |
| Na <sup>A</sup>                  | 0.22                   | 0.28                                | 0.19                     | 0.20                                 | 0.02                      |
| K                                | 0.05                   | 0.26                                | 0.06                     | 0.12                                 | 0.07                      |
| ΣA                               | 0.26                   | 0.54                                | 0.25                     | 0.31                                 | 0.09                      |
| Total                            | 15.26                  | 15.54                               | 15.25                    | 15.31                                | 15.09                     |
| Amphibole name*                  | ferrian-tschermakite   | potassian-ferro-edenitic hornblende | alumino-tschermakite     | magnesio-hornblende                  | magnesio-hornblende       |

\* determined using Probe-AMPH (Tindle and Webb, 1994).
