# Supplementary material
Source: publisher figshare collection journal article supplement (https://gsapubs.figshare.com/ndownloader/files/22398732)
Supplement: Supplementary file 1 [file 22398732 › SD_T10.pdf]

**Table SD10.** Representative plagioclase analyses used in hornblende-plagioclase temperature calculations.

| Sample                           | <i>K16b-87</i>             | <i>91TH181</i>          | <i>93TH417</i>          | <i>94KK27</i>                   | <i>04SE5</i>       | <i>08SE429</i>   | <i>08SE451</i>         | <i>08SE463</i>   | <i>08SE674</i>           | <i>08TC27a</i>                       | <i>10SE1</i>              |
|----------------------------------|----------------------------|-------------------------|-------------------------|---------------------------------|--------------------|------------------|------------------------|------------------|--------------------------|--------------------------------------|---------------------------|
| Unit                             | South tonalite of Vergeles | Claraville granodiorite | Claraville granodiorite | Granodiorite of Jacobsen Meadow | Lebec granodiorite | Unnamed tonalite | Antimony Peak tonalite | Unnamed tonalite | White Oak diorite gneiss | Granodiorite of Gamble Spring Canyon | Granite of Brush Mountain |
| SiO <sub>2</sub>                 | 59.98                      | 61.79                   | 62.16                   | 60.26                           | 61.23              | 58.03            | 59.54                  | 59.47            | 61.66                    | 63.20                                | 47.98                     |
| Al <sub>2</sub> O <sub>3</sub>   | 26.22                      | 24.05                   | 24.08                   | 24.80                           | 24.64              | 26.18            | 26.20                  | 25.88            | 24.43                    | 23.16                                | 32.90                     |
| Fe <sub>2</sub> O <sub>3</sub> * | 0.09                       | 0.10                    | 0.02                    | 0.16                            | 0.06               | 0.10             | 0.20                   | 0.15             | 0.07                     | 0.13                                 | 0.12                      |
| FeO                              | 0.00                       | 0.00                    | 0.00                    | 0.00                            | 0.00               | 0.00             | 0.00                   | 0.00             | 0.00                     | 0.00                                 | 0.00                      |
| CaO                              | 7.06                       | 5.50                    | 5.47                    | 6.48                            | 6.14               | 7.70             | 7.26                   | 7.50             | 5.55                     | 4.37                                 | 16.22                     |
| Na <sub>2</sub> O                | 7.76                       | 8.62                    | 8.56                    | 7.98                            | 8.10               | 7.37             | 7.23                   | 7.42             | 8.60                     | 9.40                                 | 2.32                      |
| K <sub>2</sub> O                 | 0.14                       | 0.21                    | 0.20                    | 0.20                            | 0.15               | 0.21             | 0.28                   | 0.24             | 0.09                     | 0.11                                 | 0.03                      |
| Total                            | 101.24                     | 100.26                  | 100.49                  | 99.87                           | 100.32             | 99.59            | 100.71                 | 100.66           | 100.39                   | 100.37                               | 99.59                     |
| Si                               | 2.64                       | 2.74                    | 2.74                    | 2.69                            | 2.71               | 2.61             | 2.64                   | 2.64             | 2.73                     | 2.79                                 | 2.21                      |
| Al                               | 1.36                       | 1.26                    | 1.25                    | 1.30                            | 1.29               | 1.39             | 1.37                   | 1.36             | 1.27                     | 1.21                                 | 1.79                      |
| Fe <sup>3+</sup>                 | 0.00                       | 0.00                    | 0.00                    | 0.01                            | 0.00               | 0.00             | 0.01                   | 0.01             | 0.00                     | 0.00                                 | 0.00                      |
| ΣT                               | 4.01                       | 4.00                    | 4.00                    | 4.00                            | 4.00               | 4.00             | 4.02                   | 4.00             | 4.00                     | 4.00                                 | 4.00                      |
| Ca                               | 0.33                       | 0.26                    | 0.26                    | 0.31                            | 0.29               | 0.37             | 0.35                   | 0.36             | 0.26                     | 0.21                                 | 0.80                      |
| Na                               | 0.66                       | 0.74                    | 0.73                    | 0.69                            | 0.70               | 0.64             | 0.62                   | 0.64             | 0.74                     | 0.80                                 | 0.21                      |
| K                                | 0.01                       | 0.01                    | 0.01                    | 0.01                            | 0.01               | 0.01             | 0.02                   | 0.01             | 0.00                     | 0.01                                 | 0.00                      |
| ΣM                               | 1.00                       | 1.01                    | 1.00                    | 1.01                            | 1.00               | 1.03             | 0.98                   | 1.01             | 1.01                     | 1.02                                 | 1.01                      |
| Total                            | 5.01                       | 5.01                    | 5.00                    | 5.01                            | 5.00               | 5.03             | 5.00                   | 5.01             | 5.01                     | 5.02                                 | 5.01                      |
| X <sub>an</sub>                  | 0.33                       | 0.26                    | 0.26                    | 0.31                            | 0.30               | 0.37             | 0.36                   | 0.36             | 0.26                     | 0.20                                 | 0.79                      |
| X <sub>ab</sub>                  | 0.67                       | 0.74                    | 0.74                    | 0.69                            | 0.70               | 0.63             | 0.64                   | 0.64             | 0.74                     | 0.80                                 | 0.21                      |
| Feldspar name                    | Andesine                   | Oligoclase              | Oligoclase              | Andesine                        | Oligoclase         | Andesine         | Andesine               | Andesine         | Oligoclase               | Oligoclase                           | Bytownite                 |

\* Ferric iron calculated using the program AX (Holland and Powell, 1998).
