# Supplementary material
Source: publisher figshare collection journal article supplement (https://gsapubs.figshare.com/ndownloader/files/22398732)
Supplement: Supplementary file 1 [file 22398732 › SD_T11.pdf]

**Table SD11.** Summary of sample locations, rock units, major and trace element geochemistry, and isotopic data from the western San Emigdio mafic complex and the Bean Canyon pendant.

| Sample                         | <i>09SE21A</i> | <i>09SE21B</i> | <i>09SE32B</i> | <i>07TM9</i> | <i>07TM10</i> |
|--------------------------------|----------------|----------------|----------------|--------------|---------------|
| UTM easting <sup>§</sup>       | 295364         | 295364         | 295451         | 374356       | 374329        |
| UTM northing <sup>§</sup>      | 3869181        | 3869181        | 3869123        | 3872473      | 3872628       |
| Unit <sup>#</sup>              | WSEMC          | WSEMC          | WSEMC          | BC           | BC            |
| Major elements (Wt. %)         |                |                |                |              |               |
| SiO <sub>2</sub>               | 49.45          | 48.71          | 49.70          | 65.29        | 67.08         |
| TiO <sub>2</sub>               | 1.32           | 1.04           | 1.33           | 0.55         | 0.34          |
| Al <sub>2</sub> O <sub>3</sub> | 14.91          | 17.47          | 14.85          | 16.31        | 17.04         |
| FeO*                           | 9.75           | 8.24           | 9.75           | 4.03         | 2.76          |
| MnO                            | 0.20           | 0.14           | 0.16           | 0.11         | 0.06          |
| MgO                            | 7.28           | 6.35           | 7.75           | 1.41         | 0.97          |
| CaO                            | 12.87          | 13.77          | 12.88          | 1.87         | 3.35          |
| Na <sub>2</sub> O              | 2.44           | 2.84           | 2.35           | 5.26         | 5.16          |
| K <sub>2</sub> O               | 0.13           | 0.10           | 0.11           | 3.37         | 1.26          |
| P <sub>2</sub> O <sub>5</sub>  | 0.11           | 0.09           | 0.11           | 0.18         | 0.10          |
| Sum                            | 98.47          | 98.74          | 99.00          | 98.37        | 98.14         |
| LOI                            | 0.76           | 0.81           | 0.93           | 0.55         | 0.81          |
| XRF trace element data (ppm):  |                |                |                |              |               |
| Ni                             | 70             | 79             | 49             | 5            | 3             |
| Cr                             | 325            | 316            | 274            | 6            | 4             |
| Sc                             | 47             | 38             | 46             | 13           | 5             |
| V                              | 284            | 229            | 294            | 59           | 52            |
| Ba                             | 26             | 12             | 27             | 1073         | 479           |
| Rb                             | 1              | 1              | 0              | 133          | 49            |
| Sr                             | 137            | 147            | 141            | 370          | 197           |
| Zr                             | 77             | 61             | 76             | 166          | 140           |
| Y                              | 29             | 23             | 30             | 29           | 14            |
| Nb                             | 3.7            | 3.0            | 3.6            | 13.0         | 10.2          |
| Ga                             | 16             | 16             | 16             | 16           | 15            |
| Cu                             | 69             | 86             | 73             | 18           | 11            |
| Zn                             | 78             | 64             | 77             | 76           | 53            |
| Pb                             | 0              | 1              | 0              | 10           | 8             |
| La                             | 4              | 4              | 3              | 32           | 22            |
| Ce                             | 12             | 7              | 18             | 63           | 39            |
| Th                             | 0              | 0              | 0              | 11           | 9             |
| Nd                             | 10             | 7              | 10             | 28           | 14            |
| U                              | 1              | 1              | 0              | 3            | 3             |

**Table SD11 (Continued).**

| Sample                          | <i>09SE21A</i> | <i>09SE21B</i> | <i>09SE32B</i> | <i>07TM9</i> | <i>07TM10</i> |
|---------------------------------|----------------|----------------|----------------|--------------|---------------|
| ICP-MS trace element data (ppm) |                |                |                |              |               |
| La                              | 3.24           | 2.72           | 3.44           | 32.63        | 21.26         |
| Ce                              | 9.56           | 7.87           | 9.84           | 63.22        | 39.36         |
| Pr                              | 1.61           | 1.32           | 1.65           | 7.43         | 4.27          |
| Nd                              | 8.71           | 6.91           | 8.80           | 27.72        | 14.98         |
| Sm                              | 3.12           | 2.47           | 3.09           | 5.69         | 2.76          |
| Eu                              | 1.22           | 1.00           | 1.18           | 1.49         | 1.05          |
| Gd                              | 4.18           | 3.49           | 4.15           | 5.14         | 2.31          |
| Tb                              | 0.78           | 0.63           | 0.78           | 0.82         | 0.36          |
| Dy                              | 5.21           | 4.06           | 5.20           | 4.95         | 2.22          |
| Ho                              | 1.10           | 0.89           | 1.11           | 1.03         | 0.46          |
| Er                              | 3.06           | 2.40           | 3.06           | 2.88         | 1.38          |
| Tm                              | 0.44           | 0.35           | 0.44           | 0.43         | 0.22          |
| Yb                              | 2.70           | 2.18           | 2.70           | 2.72         | 1.55          |
| Lu                              | 0.43           | 0.34           | 0.43           | 0.44         | 0.26          |
| Ba                              | 29.17          | 11.82          | 24.83          | 1078.65      | 480.83        |
| Th                              | 0.18           | 0.20           | 0.18           | 10.35        | 8.14          |
| Nb                              | 2.24           | 2.36           | 2.52           | 11.99        | 9.46          |
| Y                               | 27.85          | 22.01          | 27.88          | 26.63        | 12.50         |
| Hf                              | 2.13           | 1.72           | 2.12           | 4.36         | 3.47          |
| Ta                              | 0.17           | 0.17           | 0.18           | 0.75         | 0.75          |
| U                               | 0.09           | 0.07           | 0.23           | 3.26         | 2.87          |
| Pb                              | 0.47           | 0.37           | 0.37           | 9.67         | 6.68          |
| Rb                              | 1.17           | 1.00           | 0.98           | 127.82       | 47.20         |
| Cs                              | 0.03           | 0.11           | 0.05           | 2.98         | 4.24          |
| Sr                              | 138.32         | 148.24         | 141.20         | 360.87       | 191.88        |
| Sc                              | 43.23          | 35.79          | 41.99          | 12.11        | 4.92          |
| Zr                              | 76.02          | 59.65          | 74.75          | 164.72       | 139.78        |

\* total Fe as FeO.

§ UTM coordinates are WGS datum, zone 11N.

# WSEMC, Western San Emigdio mafic complex basaltic sheeted dikes and pillows; BC, Bean Canyon pendant silicic metavolcanics.

**Table SD11 (Continued).**

| Sample                                                | <i>09SE21A</i>      | <i>09SE32B</i> |
|-------------------------------------------------------|---------------------|----------------|
|                                                       | TIMS Sr and Nd data |                |
| Sm (ppm)                                              | 2.669               | 2.932          |
| Nd (ppm)                                              | 7.47716             | 8.751          |
| $^{147}\text{Sm}/^{144}\text{Nd}$                     | 0.215831            | 0.202589       |
| $^{143}\text{Nd}/^{144}\text{Nd}(0)$                  | 0.513289            | 0.513064       |
| $\epsilon_{\text{Nd}}(160)^{\dagger}$                 | +13.77              | +9.30          |
| $\epsilon_{\text{Nd}}(484)^{\dagger\dagger}$          | +15.91              | +11.31         |
| Rb (ppm)                                              | 2.811               | 1.49           |
| Sr (ppm)                                              | 170.336             | 133.984        |
| $^{87}\text{Rb}/^{86}\text{Sr}$                       | 0.04775875          | 0.031965       |
| $^{87}\text{Sr}/^{86}\text{Sr}(0)$                    | 0.703635            | 0.703393       |
| $^{87}\text{Sr}/^{86}\text{Sr}(160)^{\dagger}$        | 0.703526            | 0.703320       |
| $^{87}\text{Sr}/^{86}\text{Sr}(484)^{\dagger\dagger}$ | 0.703307            | 0.703173       |

$\dagger$  Age-corrected for 160 Ma, the intrusion age of tonalite and gabbro of the WSEMC (James, 1986a; this study).

$\dagger\dagger$  Age-corrected for 484 Ma, the age of basalt-gabbro blocks of the Kings-Kaweah ophiolite belt (Saleeby, 2011).
