# Supplementary material
Source: publisher figshare collection journal article supplement (https://gsapubs.figshare.com/ndownloader/files/22398732)
Supplement: Supplementary file 1 [file 22398732 › T2.pdf]

| Sample | UTM<br>easting <sup>a</sup> | UTM<br>northing <sup>a</sup> | Elevation<br>(m) | Pseudo-<br>elevation <sup>b</sup> (m) | Mean age<br>(Ma) | Error <sup>c</sup> (Ma) | Number of<br>replicates |
|--------|-----------------------------|------------------------------|------------------|---------------------------------------|------------------|-------------------------|-------------------------|
| 04SS32 | 350708                      | 3940938                      | 1506             | 2327                                  | 77.3             | 8.0                     | 4                       |
| 04SS27 | 350384                      | 3899048                      | 1485             | 2193                                  | 72.2             | 4.5                     | 4                       |
| 04SS28 | 349061                      | 3897426                      | 1818             | 3319                                  | 83.5             | 6.3                     | 4                       |
| 04SS30 | 396529                      | 3933080                      | 1891             | 2416                                  | 70.0             | 3.9                     | 3                       |
| 04SS33 | 391015                      | 3932556                      | 1164             | 2518                                  | 76.8             | 2.3                     | 4                       |
| 04SS35 | 388629                      | 3925972                      | 1515             | 2949                                  | 84.7             | 6.7                     | 6                       |
| 04SS36 | 384771                      | 3924533                      | 1900             | 2701                                  | 69.2             | 2.4                     | 4                       |
| 04SS38 | 380280                      | 3923122                      | 1879             | 3129                                  | 78.2             | 8.1                     | 5                       |
| 04SS39 | 376370                      | 3924106                      | 2242             | 3239                                  | 73.7             | 5.2                     | 4                       |
| 04SS40 | 373067                      | 3921963                      | 2242             | 3347                                  | 76.7             | 5.2                     | 4                       |
| 04SS41 | 371086                      | 3920961                      | 1874             | 3576                                  | 83.8             | 5.9                     | 5                       |
| 04SS43 | 371523                      | 3918853                      | 1515             | 3424                                  | 81.1             | 8.3                     | 7                       |
