# Supplementary material
Source: publisher figshare collection journal article supplement (https://gsapubs.figshare.com/ndownloader/files/22398732)
Supplement: Supplementary file 1 [file 22398732 › T3.pdf]

| Sample  | Location                                                                            | Zone | UTM<br>easting <sup>a</sup> | UTM<br>northing <sup>a</sup> | Mineralogy <sup>b</sup>                                              | T (°C) <sup>c</sup> | P (kbar) <sup>c</sup> | Corr <sup>d</sup> |
|---------|-------------------------------------------------------------------------------------|------|-----------------------------|------------------------------|----------------------------------------------------------------------|---------------------|-----------------------|-------------------|
| 31001-5 | Santa Lucia Mountains<br>adjacent to the Pine Ridge<br>ultramafic body (Bush, 1981) | 10   | 621473                      | 4015561                      | Garnet + cordierite + sillimanite + quartz                           | 695 ± 59            | 3.4 ± 0.5             | 0.835             |
| 08TC29  | Southern Tehachapi<br>Mountains: Tylerhorse<br>Canyon pendant                       | 11   | 366844                      | 3870569                      | Garnet + cordierite + andalusite + quartz +<br>plagioclase + biotite | 557 ± 40            | 2.4 ± 0.5             | 0.851             |
| 10SE41  | San Emigdio Mountains: Salt<br>Creek pendant                                        | 11   | 322430                      | 3860201                      | Garnet + sillimanite + plagioclase + quartz                          | 649 ± 102           | 3.7 ± 1.7             | 0.620             |
