# Supplementary material
Source: publisher figshare collection journal article supplement (https://gsapubs.figshare.com/ndownloader/files/22398732)
Supplement: Supplementary file 1 [file 22398732 › T5.pdf]

| Correlation          | Native site                                             | Displaced site                                                     | Features <sup>a</sup>         | Distance<br>(km) <sup>b</sup> | Azimuth <sup>c</sup> | $\Delta P$ (kbar) <sup>d</sup> | Plunge <sup>e</sup> | Source <sup>f</sup>     |
|----------------------|---------------------------------------------------------|--------------------------------------------------------------------|-------------------------------|-------------------------------|----------------------|--------------------------------|---------------------|-------------------------|
| a-a'                 | Area between Kern Plateau pendants and Isabella pendant | Bean Canyon and Tylerhorse Canyon pendants                         | S, UM, MV, DZ, IA, F, ID, Sri | 100                           | 200°                 | 1.3 - 3.1                      | 4°                  | this study, WS97 (b-b') |
| b-b'                 | Erskine Canyon sequence                                 | Oak Creek Pass complex                                             | S, MV, IA, Sri                | 45                            | 185°                 | 0.1 - 3.3                      | 7°                  | this study, WS97 (e-e') |
| c-c'                 | Monolith and Back Canyon pendants                       | Quinn Ranch and Aqueduct Tunnel pendants                           | S, IA, Sri                    | 75                            | 220°                 | > 1.7                          | 4°                  | this study, WS97 (a-a') |
| d-d'                 | Antelope Canyon group                                   | Salt Creek pendant                                                 | S, DZ, IA, Sri                | 60                            | 250°                 | 2.8 - 3.4                      | 10°                 | this study              |
| e-e'                 | Area southwest of Rand Mountains                        | Gabilan Range, Santa Lucia Range, and southern Ben Lomond Mountain | S, UM, DZ, IA, Sri            | 75                            | 225°                 | ~2.5 (CRB)                     | 6°                  | this study              |
| f-f'                 | Cummings Valley                                         | Montara Mountain, northern Ben Lomond Mountain, and Bodega Head    | IA, Sri                       | 150                           | 250°                 | ~ 3                            | 4°                  | this study. WS97 (j-j') |
| g-g'                 | Southwestern Sierra Nevada foothills                    | Western San Emigdio mafic complex                                  | MV, IA, Sri                   | 60                            | 220°                 | > 2.5                          | 8°                  | this study              |
| h-h'                 | Area between Tylerhorse Canyon and Quinn Ranch pendants | Area north of Kelso Valley                                         | I, IA, Sri                    | 60                            | 210°                 | 2.9 - 3.7                      | 10°                 | WS97 (c-c')             |
| i-i'                 | Granite of Bob Rabbit Canyon                            | Granite of Tejon Lookout                                           | I, IA, Sri                    | 70                            | 195°                 | ~ 3                            | 8°                  | WS97 (d-d')             |
| j-j'                 | Granite of Onyx                                         | Granite of Lone Tree Canyon                                        | I                             | 50                            | 170°                 | ND                             | ND                  | WS97 (f-f')             |
| k-k'                 | Summit gabbro of Walker Pass                            | mafic plutons in the southern Rand Mountains                       | I                             | 70                            | 200°                 | ND                             | ND                  | WS97 (g-g')             |
| l-l'                 | Granite of Long Meadow                                  | Granite of Bishop Ranch                                            | I                             | 55                            | 160°                 | ND                             | ND                  | WS97 (h-h')             |
| m-m'                 | Granite of Onyx                                         | Bishop Ranch leucogranite                                          | I                             | 50                            | 185°                 | ND                             | ND                  | WS97 (i-i')             |
| Average <sup>g</sup> |                                                         |                                                                    |                               | 71 ± 28                       | 205 ± 28°            | 2.5 ± 0.6°                     | 6.5 ± 3.1°          |                         |
