# Supplementary material
Source: publisher figshare collection journal article supplement (https://gsapubs.figshare.com/ndownloader/files/22398732)
Supplement: Supplementary file 1 [file 22398732 › Table1.pdf]

| Sample         | Lithology                              | Zone | UTM easting <sup>a</sup> | UTM northing <sup>a</sup> | U-Pb zircon age (Ma)                    |
|----------------|----------------------------------------|------|--------------------------|---------------------------|-----------------------------------------|
| <b>08SE46</b>  | Antimony Peak tonalite                 | 11   | 319551                   | 3864823                   | Cores: 135.6 ± 2.1<br>Rims: 103.4 ± 2.3 |
| <b>08SE262</b> | Antimony Peak tonalite                 | 11   | 308858                   | 3863886                   | 136.4 ± 0.9                             |
| <b>08SE451</b> | Antimony Peak tonalite                 | 11   | 307028                   | 3861038                   | 135.8 ± 1.0                             |
| <b>08SE582</b> | Antimony Peak tonalite                 | 11   | 305678                   | 3860356                   | 134.5 ± 1.0                             |
| <b>08SE675</b> | Antimony Peak tonalite                 | 11   | 324340                   | 3863296                   | Cores: 136.4 ± 2.1<br>Rims: 98.5 ± 2.8  |
| <b>07SE94</b>  | San Emigdio gneiss                     | 11   | 314647                   | 3863872                   | 105.8 ± 0.6                             |
| <b>08SE450</b> | San Emigdio gneiss                     | 11   | 307107                   | 3860929                   | 105.1 ± 2.4                             |
| <b>08SE674</b> | Digier Canyon/White Oak diorite gneiss | 11   | 324461                   | 3861916                   | 121.3 ± 1.4                             |
| <b>08SE679</b> | Digier Canyon/White Oak diorite gneiss | 11   | 325421                   | 3861840                   | 105.2 ± 2.7                             |
| <b>04SE5</b>   | Lebec granodiorite                     | 11   | 311257                   | 3858324                   | 91.6 ± 0.7                              |
| <b>06SE19a</b> | Lebec granodiorite                     | 11   | 316199                   | 3864484                   | 91.1 ± 1.7                              |
| <b>08SE256</b> | Lebec granodiorite                     | 11   | 312736                   | 3860408                   | 88.4 ± 1.2                              |
| <b>91TH181</b> | Claraville granodiorite                | 11   | 371313                   | 3879868                   | 91.91 ± 0.47                            |
| <b>93TH417</b> | Claraville granodiorite                | 11   | 368657                   | 3878458                   | 91.93 ± 0.56                            |
| <b>10TC5</b>   | Granodiorite of Gato Montes            | 11   | 294640                   | 3863171                   | 92.1 ± 1.0                              |
| <b>08TC27a</b> | Granodiorite of Gamble Spring Canyon   | 11   | 367862                   | 3870810                   | 146.8 ± 0.4                             |
| <b>08SE596</b> | Granite of Brush Mountain              | 11   | 297219                   | 3861811                   | 104.5 ± 0.8                             |
| <b>09SE23</b>  | White Ridge tonalite                   | 11   | 291420                   | 3867183                   | 155.2 ± 3.4                             |
| <b>G11</b>     | Guadalupe pluton                       | 10   | 754858                   | 4147150                   | 151.2 ± 0.8                             |
| <b>91TH140</b> | Oaks metavolcanic                      | 11   | 368664                   | 3881115                   | 102.64 ± 0.97                           |
| <b>07TM10</b>  | Bean Canyon metavolcanic               | 11   | 374359                   | 3872499                   | 273.0 ± 2.4                             |
| <b>11BC1</b>   | Bean Canyon amphibolite                | 11   | 374571                   | 3872044                   | 487.4 ± 3.4                             |
