# Supplementary material
Source: publisher figshare collection journal article supplement (https://gsapubs.figshare.com/ndownloader/files/22398732)
Supplement: Supplementary file 1 [file 22398732 › Table4.pdf]

| Sample         | Unit                                       | Zone | UTM<br>easting <sup>a</sup> | UTM<br>northing <sup>a</sup> | Hbl-Plag T <sup>b</sup><br>(°C) | Error <sup>c</sup> | AS95 P <sup>d</sup><br>(kbar) | Error <sup>c</sup> | HZ86 P <sup>e</sup><br>(kbar) | Error <sup>c</sup> | H87 P <sup>f</sup> (kbar) | Error <sup>c</sup> | JR89 P <sup>g</sup><br>(kbar) | Error <sup>c</sup> | S92 P <sup>h</sup> (kbar) | Error <sup>c</sup> |
|----------------|--------------------------------------------|------|-----------------------------|------------------------------|---------------------------------|--------------------|-------------------------------|--------------------|-------------------------------|--------------------|---------------------------|--------------------|-------------------------------|--------------------|---------------------------|--------------------|
| <b>94KK27</b>  | Granodiorite of<br>Jacobsen Meadow         | 11   | 355753                      | 4010210                      | 712                             | 13 (42)            | 3.8                           | 0.4 (0.7)          | 3.7                           | 0.5 (3.0)          | 3.8                       | 0.6 (1.2)          | 2.9                           | 0.5 (0.7)          | 4.2                       | 0.5 (0.8)          |
| <b>10SE1</b>   | Granite of Brush<br>Mountain               | 11   | 296912                      | 3862460                      | 731                             | 24 (47)            | 3.2                           | 0.7 (0.9)          | 3.5                           | 1.2 (3.2)          | 3.5                       | 1.4 (1.7)          | 2.7                           | 1.0 (1.2)          | 4.0                       | 1.2 (1.3)          |
| <b>K16b-87</b> | South tonalite of<br>Vergeles              | 10   | 634652                      | 4073302                      | 710                             | 8 (41)             | 4.7                           | 0.3 (0.7)          | 4.8                           | 0.3 (3.0)          | 5.0                       | 0.4 (1.1)          | 3.9                           | 0.3 (0.6)          | 5.2                       | 0.3 (0.7)          |
| <b>04SE5</b>   | Lebec granodiorite                         | 11   | 311257                      | 3858324                      | 636                             | 13 (42)            | 3.3                           | 0.9 (1.0)          | 2.6                           | 0.9 (3.1)          | 2.5                       | 1.0 (1.4)          | 2.0                           | 0.7 (0.9)          | 3.1                       | 0.8 (1.0)          |
| <b>93TH417</b> | Claraville<br>granodiorite                 | 11   | 368657                      | 3878458                      | 679                             | 15 (43)            | 3.8                           | 0.3 (0.7)          | 3.3                           | 0.3 (3.0)          | 3.3                       | 0.3 (1.1)          | 2.6                           | 0.3 (0.6)          | 3.8                       | 0.3 (0.7)          |
| <b>91TH181</b> | Claraville<br>granodiorite                 | 11   | 371313                      | 3879868                      | 732                             | 9 (41)             | 3.6                           | 0.3 (0.7)          | 3.9                           | 0.2 (3.0)          | 4.0                       | 0.3 (1.0)          | 3.1                           | 0.2 (0.5)          | 4.4                       | 0.2 (0.6)          |
| <b>08SE463</b> | Tonalite of San<br>Emigdio Creek           | 11   | 307763                      | 3860816                      | 711                             | 15 (43)            | 5.2                           | 0.6 (0.8)          | 5.2                           | 0.5 (3.0)          | 5.5                       | 0.5 (1.1)          | 4.2                           | 0.4 (0.6)          | 5.7                       | 0.4 (0.7)          |
| <b>08SE429</b> | Tonalite of San<br>Emigdio Creek           | 11   | 305382                      | 3860121                      | 687                             | 25 (47)            | 5.6                           | 0.3 (0.7)          | 5.4                           | 0.3 (3.0)          | 5.7                       | 0.3 (1.1)          | 4.4                           | 0.2 (0.6)          | 5.8                       | 0.3 (0.7)          |
| <b>08SE451</b> | Antimony Peak<br>tonalite                  | 11   | 307028                      | 3861038                      | 675                             | 78 (88)            | 9.7                           | 1.5 (1.6)          | 10.0                          | 0.4 (3.0)          | 10.9                      | 0.4 (1.1)          | 8.2                           | 0.3 (0.6)          | 10.2                      | 0.3 (0.7)          |
| <b>08SE674</b> | White Oak diorite<br>gneiss                | 11   | 324461                      | 3861916                      | 657                             | 17 (44)            | 11.0                          | 0.3 (0.7)          | 10.6                          | 0.1 (3.0)          | 11.5                      | 0.1 (1.0)          | 8.8                           | 0.1 (0.5)          | 10.7                      | 0.1 (0.6)          |
| <b>08TC27a</b> | Granodiorite of<br>Gamble Spring<br>Canyon | 11   | 367862                      | 3870810                      | 626                             | 28 (49)            | 3.0                           | 0.6 (0.8)          | 2.2                           | 0.5 (3.0)          | 2.1                       | 0.6 (1.2)          | 1.7                           | 0.5 (0.7)          | 2.8                       | 0.5 (0.8)          |
