# Supplementary material
Source: publisher figshare collection journal article supplement (https://gsapubs.figshare.com/ndownloader/files/22398732)
Supplement: Supplementary file 1 [file 22398732 › Table_A1.pdf]

|                 |                                                  |
|-----------------|--------------------------------------------------|
| Al-in-hbl       | aluminum-in-hornblende igneous barometry         |
| CL              | cathodoluminescence                              |
| E-MORB          | enriched mid-ocean ridge basalt                  |
| K-S             | Kolmogorov-Smirnov                               |
| KWF             | Kern Canyon - proto White Wolf fault             |
| LIP             | large igneous province                           |
| MDS             | multidimensional scaling                         |
| N-MORB          | normal mid-ocean ridge basalt                    |
| PKCF            | proto-Kern Canyon fault                          |
| SCB             | southern California batholith                    |
| SNB             | Sierra Nevada batholith                          |
| Sr <sub>i</sub> | initial <sup>87</sup> Sr/ <sup>86</sup> Sr       |
| SSD             | southern Sierra detachment system                |
| WSEMC           | western San Emigdio Mafic complex                |
| "the schist"    | Rand, San Emigdio, and Sierra de Salinas schists |
