# Supplementary material
Source: publisher figshare collection journal article supplement (https://gsapubs.figshare.com/ndownloader/files/22398732)

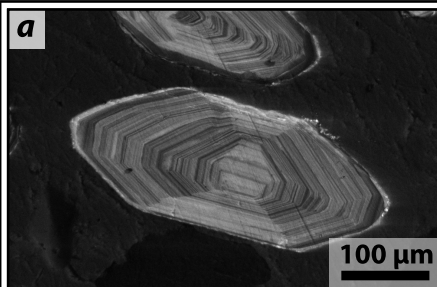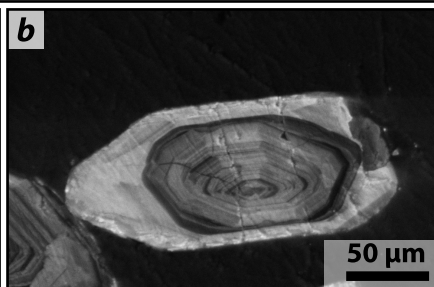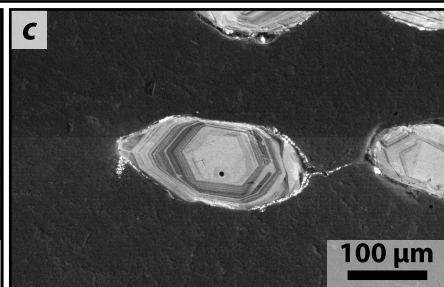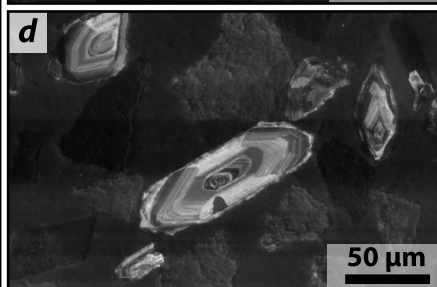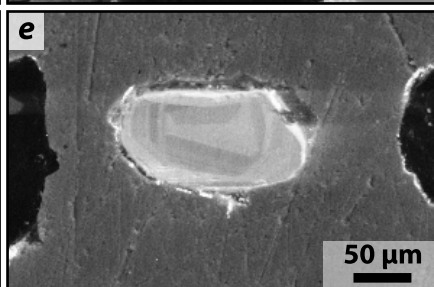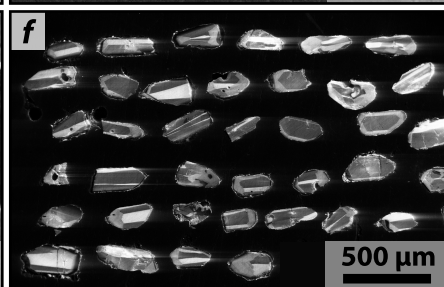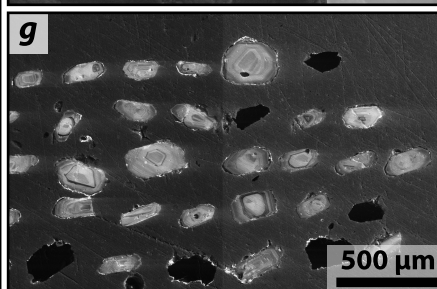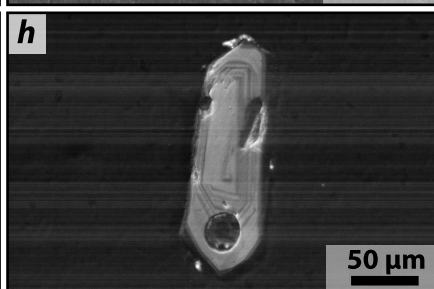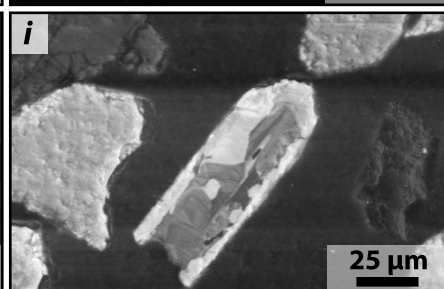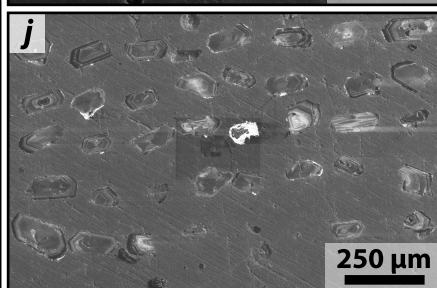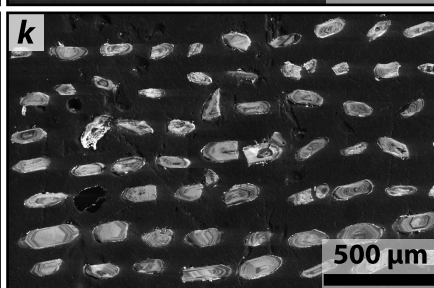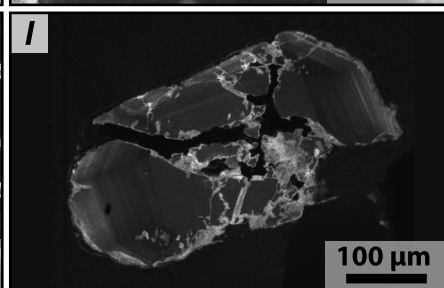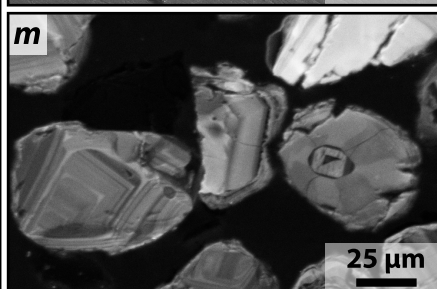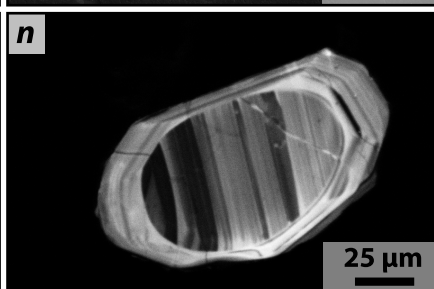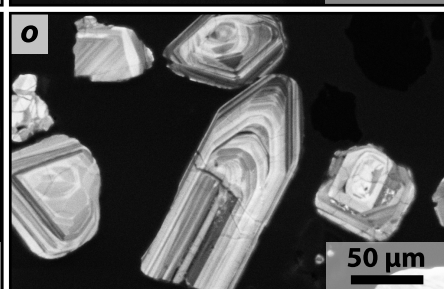

Supplement: Supplementary file 1 [file 22398732 › SD1_CL.pdf]

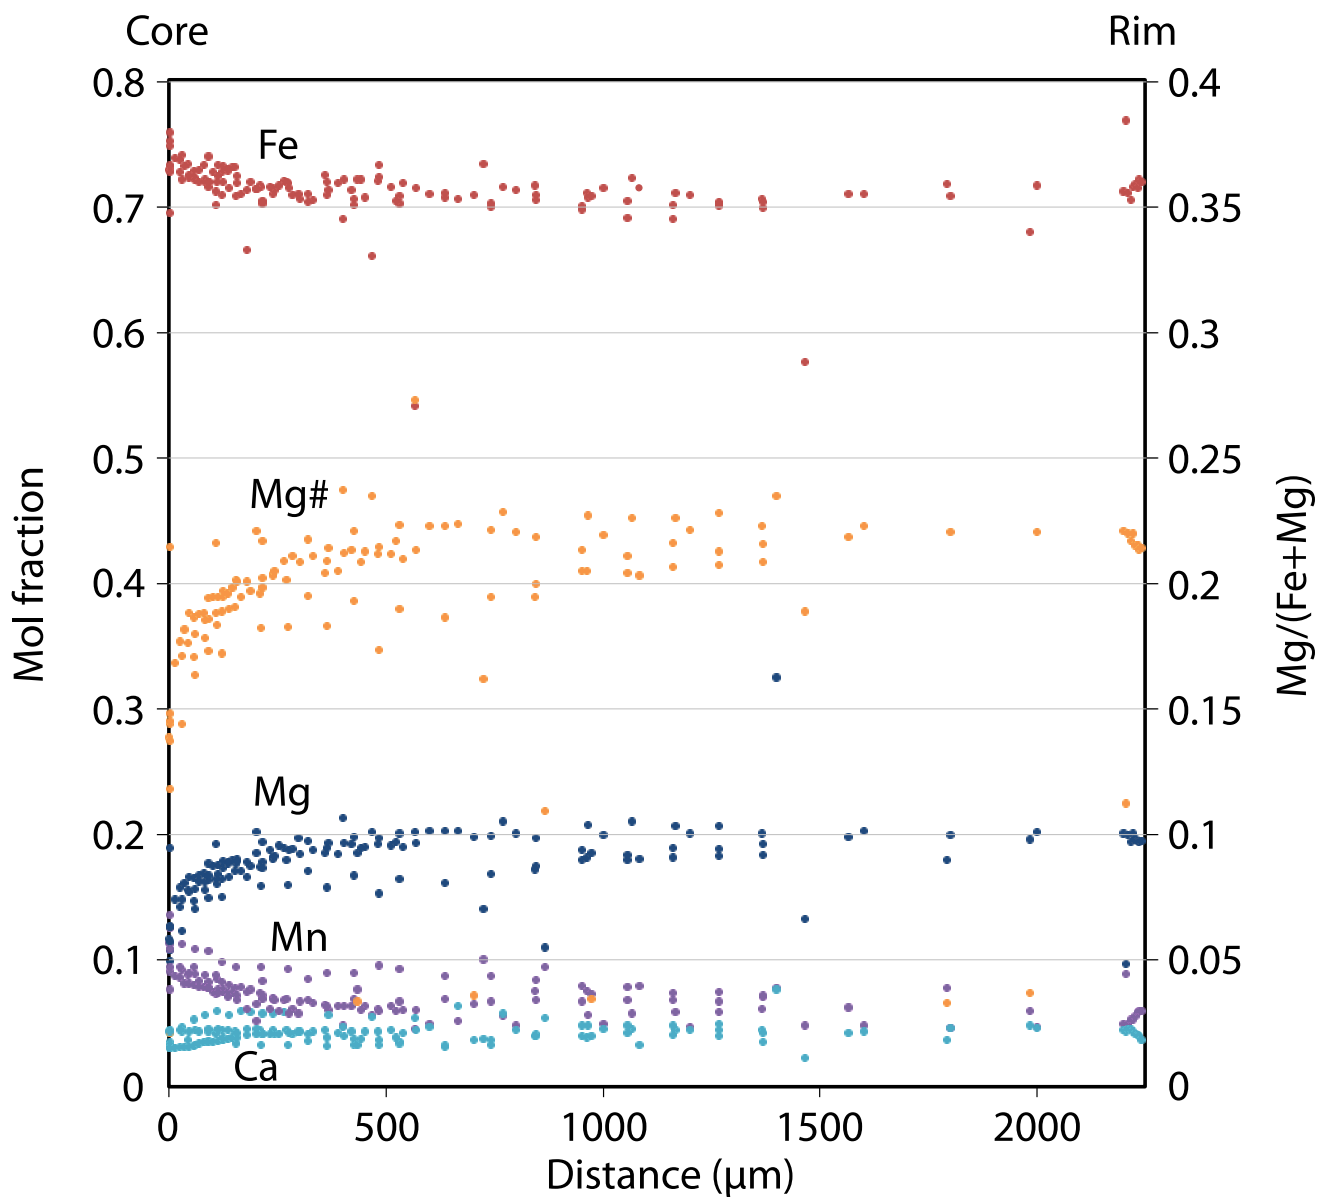

Supplement: Supplementary file 1 [file 22398732 › DR2.pdf]
